# Supplementary material for: Cryopreservation process alters the expression of genes involved in pathways associated with the fertility of bull spermatozoa
Source: Front Genet. 2022 Oct 25;13:1025004. doi: 10.3389/fgene.2022.1025004 (PMC9640914; doi:10.3389/fgene.2022.1025004)
Supplement: Supplementary file 1 [file Table2.XLSX]

## Sheet: Up_GO
Category	Term	Count	%	PValue	Genes	List Total	Pop Hits	Pop Total	Fold Enrichment	Bonferroni	Benjamini	FDR
GOTERM_BP_DIRECT	GO:0000122~negative regulation of transcription from RNA polymerase II promoter	10	8.06452	0.00162559	MAF, SATB2, PHF14, SIX1, DCAF1, RBM15, ZBTB18, PROX1, KMT5A, DNAJB5	91	420	13824	3.61695	0.565954	0.565954	2.32384
GOTERM_BP_DIRECT	GO:0045944~positive regulation of transcription from RNA polymerase II promoter	10	8.06452	0.0130658	MAF, SATB2, SALL1, SIX1, EOMES, SOX4, CITED4, PROX1, BMP5, PIN1	91	580	13824	2.61917	0.998826	0.675182	17.3104
GOTERM_BP_DIRECT	GO:0045664~regulation of neuron differentiation	3	2.41935	0.00221904	SIX1, EOMES, NGF	91	11	13824	41.4306	0.680064	0.434371	3.15962
GOTERM_BP_DIRECT	GO:0031954~positive regulation of protein autophosphorylation	3	2.41935	0.00362518	RAP2B, RAP2A, PDGFA	91	14	13824	32.5526	0.844809	0.46261	5.1134
GOTERM_BP_DIRECT	GO:0060412~ventricular septum morphogenesis	3	2.41935	0.00599292	SOX4, RBM15, PROX1	91	18	13824	25.3187	0.954207	0.537406	8.32061
GOTERM_BP_DIRECT	GO:0048839~inner ear development	3	2.41935	0.0151831	MAF, SIX1, PROX1	91	29	13824	15.715	0.99961	0.674124	19.8375
GOTERM_BP_DIRECT	GO:0007519~skeletal muscle tissue development	3	2.41935	0.0161995	CFL2, SIX1, ZBTB18	91	30	13824	15.1912	0.99977	0.649115	21.0249
GOTERM_BP_DIRECT	GO:0042472~inner ear morphogenesis	3	2.41935	0.0318482	SPRY2, ATOH1, SIX1	91	43	13824	10.5985	1	0.841956	37.3603
GOTERM_BP_DIRECT	GO:0046619~optic placode formation involved in camera-type eye formation	2	1.6129	0.0129789	FRS2, PROX1	91	2	13824	151.912	0.998771	0.738247	17.2051
GOTERM_BP_DIRECT	GO:0050678~regulation of epithelial cell proliferation	2	1.6129	0.0509245	SIX1, FRS2	91	8	13824	37.978	1	0.931525	53.0168
GOTERM_BP_DIRECT	GO:0032486~Rap protein signal transduction	2	1.6129	0.0571069	RAP2B, RAP2A	91	9	13824	33.7582	1	0.93558	57.2514
GOTERM_BP_DIRECT	GO:0001759~organ induction	2	1.6129	0.0632495	SIX1, FRS2	91	10	13824	30.3824	1	0.938776	61.1046
GOTERM_BP_DIRECT	GO:0007405~neuroblast proliferation	2	1.6129	0.0933741	KCNA1, FRS2	91	15	13824	20.2549	1	0.979105	75.7487
GOTERM_BP_DIRECT	GO:0045638~negative regulation of myeloid cell differentiation	2	1.6129	0.099283	MEIS2, RBM15	91	16	13824	18.989	1	0.978324	77.9355
Category	Term	Count	%	PValue	Genes	List Total	Pop Hits	Pop Total	Fold Enrichment	Bonferroni	Benjamini	FDR
GOTERM_CC_DIRECT	GO:0005634~nucleus	29	23.3871	0.0290488	CPEB4, SOX4, BEX3, LUZP1, ZBTB18, CITED4, DMRTA1, DUSP18, SPRY2, ATOH1, MEIS2, TMEM190, HOXC4, BAZ2B, DNAJC2, TWIST2, KMT5A, MAF, SATB2, RBFOX3, EOMES, CDC25C, PROX1, PHF14, CSRNP2, SALL1, SIX1, RBM15, DNAJB5	107	2873	15461	1.45853	0.968224	0.968224	28.5982
GOTERM_CC_DIRECT	GO:0008076~voltage-gated potassium channel complex	3	2.41935	0.0733059	KCNA1, KCNA6, KCNJ2	107	65	15461	6.66902	0.999865	0.988365	58.102
GOTERM_CC_DIRECT	GO:0005829~cytosol	12	9.67742	0.0924004	RAP2B, SYS1, SPRY2, RAP2A, PRICKLE1, STX17, BEX3, DNAJB4, MYH9, DNAJC2, DNAJB5, ARHGDIB	107	1025	15461	1.69165	0.999988	0.977203	66.9728
Category	Term	Count	%	PValue	Genes	List Total	Pop Hits	Pop Total	Fold Enrichment	Bonferroni	Benjamini	FDR
GOTERM_MF_DIRECT	GO:0001046~core promoter sequence-specific DNA binding	3	2.41935	0.0184542	CHD2, SOX4, PROX1	84	33	13095	14.1721	0.906106	0.906106	19.4276
GOTERM_MF_DIRECT	GO:0043565~sequence-specific DNA binding	7	5.64516	0.0235687	MAF, SATB2, CSRNP2, HOXC4, SALL1, SIX1, ZBTB18	84	350	13095	3.11786	0.951639	0.780089	24.1642
GOTERM_MF_DIRECT	GO:0003700~transcription factor activity, sequence-specific DNA binding	7	5.64516	0.0703003	HOXC4, SALL1, SIX1, EOMES, SOX4, DMRTA1, ZNF391	84	458	13095	2.38264	0.999905	0.954308	57.0594
GOTERM_MF_DIRECT	GO:0005242~inward rectifier potassium channel activity	2	1.6129	0.079371	KCNJ16, KCNJ2	84	13	13095	23.9835	0.999973	0.927608	61.6745
GOTERM_MF_DIRECT	GO:0003676~nucleic acid binding	7	5.64516	0.0890448	DDX17, ZBTB34, CPEB4, SP8, RBM15, ZBTB18, ZNF391	84	488	13095	2.23617	0.999993	0.906411	66.0934
GOTERM_MF_DIRECT	GO:0019901~protein kinase binding	3	2.41935	0.0914035	SPRY2, CDC25C, CEP152	84	80	13095	5.84598	0.999995	0.868522	67.0977

## Sheet: Down_GO
Category	Term	Count	%	PValue	Genes	List Total	Pop Hits	Pop Total	Fold Enrichment	Bonferroni	Benjamini	FDR
GOTERM_BP_DIRECT	GO:0006412~translation	47	8.13149	1.57378e-29	RPL18, RPL19, RPL14, RPL13, RPL35, RPL36, RPS15A, RPL37, RPL38, RPS2, RPS3, RPS26, RPS28, RPL6, RPL3, SLC25A3, RPL10, RPL5, RPL11, RPL12, RPL10A, RPS20, RPS23, RPL36AL, RPSA, SLC25A6, RPS9, RPL24, EEF2, RPS6, RPS5, RPL28, RPS8, RPS7, RPS18, RPS19, RPL23, RPS16, RPS17, RPL13A, RPL21, RPS14, RPS15, RPL37A, SLC25A39, RPS11, UBA52	452	172	13824	8.35728	2.81077e-26	2.81077e-26	2.67007e-26
GOTERM_BP_DIRECT	GO:0007283~spermatogenesis	19	3.2872	4.38906e-05	PAIP2, CABS1, YBX3, KIT, SOD1, BCL2L11, TNP2, CYLC1, SPEM1, CYLC2, OAZ3, TBATA, ADIG, ODF2, PRM1, ODF1, PRM2, SPATA6, TSSK3	452	188	13824	3.09094	0.0753965	0.0129801	0.0744386
GOTERM_BP_DIRECT	GO:0007275~multicellular organism development	15	2.59516	0.00102469	TNP1, TNP2, HEMGN, LSM14A, SPEM1, CYLC1, CYLC2, TPI1, TBATA, LBH, ODF2, PRM1, ODF1, PRM2, SPATA6	452	165	13824	2.78037	0.839752	0.141515	1.72434
GOTERM_BP_DIRECT	GO:0030154~cell differentiation	15	2.59516	0.0177937	ELF5, TNP2, FXR1, HEMGN, RPS7, SPEM1, CYLC1, CYLC2, TBATA, TPT1, ODF2, SRD5A1, PRM1, ODF1, SPATA6	452	228	13824	2.01211	1	0.551409	26.2586
GOTERM_BP_DIRECT	GO:0098609~cell-cell adhesion	13	2.24913	1.47774e-06	RACK1, YWHAZ, HNRNPK, EIF3E, PCBP1, RPL24, EEF2, RPS2, EEF1D, TAGLN2, YWHAE, RPL29, TES	452	67	13824	5.93422	0.00263577	0.000879362	0.0025071
GOTERM_BP_DIRECT	GO:0001701~in utero embryonic development	12	2.07612	0.0151703	GPI, NMT1, HAND2, GATA3, VIM, YBX3, POLG2, UBE2B, YBX1, FOXP1, BCL2L11, CTNNB1	452	159	13824	2.30823	1	0.521875	22.8447
GOTERM_BP_DIRECT	GO:0002181~cytoplasmic translation	10	1.7301	4.96296e-08	RPL35A, RPL7, RPL6, RPL31, RPLP0, RPL8, RPLP1, RPL26, RPL36, RPL29	452	25	13824	12.2336	8.86346e-05	4.43183e-05	8.42014e-05
GOTERM_BP_DIRECT	GO:0007411~axon guidance	10	1.7301	0.0022567	WNT5A, EFNA1, DLX5, GATA3, KIF5C, RAC1, NKX2-1, DPYSL2, NR4A3, TGFB2	452	88	13824	3.47546	0.982315	0.211288	3.7605
GOTERM_BP_DIRECT	GO:0008584~male gonad development	9	1.55709	0.000223806	WNT5A, INHBA, GATA3, YBX3, H3F3A, H3F3B, KIT, BCL2L11, CITED2	452	51	13824	5.39719	0.329521	0.0434461	0.379032
GOTERM_BP_DIRECT	GO:0021762~substantia nigra development	8	1.38408	3.98384e-05	ACTB, DYNLL1, RHOA, YWHAQ, CALM3, YWHAE, CALM2, CALM1	452	30	13824	8.15575	0.0686805	0.0141298	0.0675683
GOTERM_BP_DIRECT	GO:0007286~spermatid development	8	1.38408	0.00429533	CAPZA3, UBE2J1, TNP1, H3F3A, PRM1, H3F3B, PRM2, KIT	452	63	13824	3.88369	0.999542	0.274093	7.04284
GOTERM_BP_DIRECT	GO:0006397~mRNA processing	8	1.38408	0.0247443	HNRNPL, PABPN1, SRSF3, EIF4A3, HNRNPK, PABPC1, YBX1, CTNNBL1	452	88	13824	2.78037	1	0.630065	34.6291
GOTERM_BP_DIRECT	GO:0006457~protein folding	8	1.38408	0.0606622	ACTB, HSP90AA1, TXNDC2, PPIA, PDRG1, FKBP1A, DNAJB1, DNAJA4	452	107	13824	2.28666	1	0.854421	65.4144
GOTERM_BP_DIRECT	GO:0000027~ribosomal large subunit assembly	7	1.21107	3.06212e-05	RPL6, RPL3, RPL10, RPL5, RPL11, RPL24, RPL12	452	20	13824	10.7044	0.0532217	0.0135795	0.0519391
Category	Term	Count	%	PValue	Genes	List Total	Pop Hits	Pop Total	Fold Enrichment	Bonferroni	Benjamini	FDR
GOTERM_CC_DIRECT	GO:0005634~nucleus	162	28.0277	2.14063e-14	MORF4L1, HMGN1, RPL13, CHMP5, CAPZA3, PGAM2, TCEAL8, OTUB2, CTNNB1, CTNNBL1, CITED2, ATP2B1, ACTG1, ADIG, GATA3, RPLP0, EIF1, PDHA2, AKIRIN2, IZUMO4, PABPN1, SUCLG2, CSNK1G2, LYRM4, PKIG, EEF2, POLB, PPARGC1A, SIX6, HNRNPU, HSPB9, ADRM1, RPS18, GLUL, MLLT11, SLU7, HSPB1, TEX35, UBA52, HMGB3, HMGB4, SLF1, HDGF, UBE2V1, CHCHD2, DAZAP2, MEIS1, OAZ3, TPI1, OAZ1, VRK3, MTPN, EIF3E, RAC1, NKX2-1, RNF11…	494	2873	15461	1.76478	8.07809e-12	1.34637e-12	2.96319e-11
GOTERM_CC_DIRECT	GO:0005737~cytoplasm	149	25.7785	6.80522e-08	LDHB, CNDP2, EIF5, CTNNB1, GSTM1, ADIG, RPLP0, TPT1, EIF1, PDRG1, CAB39, PABPN1, GSTT4, CSNK1G2, KIF5C, PKIG, FBP1, UBE2J1, EEF2, TMSB10, POLB, LYPLA1, SPA17, PPP1CB, ARPC1A, HSPB9, ADRM1, ACTL7B, SERBP1, SPATA18, MLLT11, SLU7, HSPB1, UBL4B, HAS2, STMN1, OSTF1, HMGB3, NT5C1B, SLF1, HDGF, UBE2V1, CDC34, IGF2BP3, ROPN1, DAZAP2, ACP1, KRT24, OAZ3, PFN1, ARIH1, THTPA, HNRNPK, OAZ1, VRK3, MTPN, RPL5, …	494	3109	15461	1.49995	2.56554e-05	3.20696e-06	9.41013e-05
GOTERM_CC_DIRECT	GO:0070062~extracellular exosome	147	25.4325	3.377e-20	LDHB, RPL14, CHMP5, EFNA1, CNDP2, CAPZA2, PGAM2, CTNNB1, ATP2B1, ACTG1, CISD1, CD44, TMEM52B, RPLP0, RPLP1, RPL11, CAB39, RPL12, PABPN1, NCALD, QDPR, FBP1, EEF2, H2AFJ, SKP1, PPP1CB, ARPC1A, RPS18, GLUL, TRIM36, RPS19, NPC2, RPS16, SERBP1, HSPB1, RAB15, STMN1, RPS11, UBA52, OSTF1, UBE2V1, ARPC4, TAGLN2, RIMS2, ACP1, KRT24, HNRNPL, RPS26, TPI1, UBE2D2, RPS28, HNRNPK, RPL7, ARPC2, MTPN, EIF3E, RAC1…	494	2162	15461	2.128	1.27313e-17	6.36564e-18	4.66965e-17
GOTERM_CC_DIRECT	GO:0016020~membrane	85	14.7059	1.90676e-19	RPL18, RPL14, RPL13, CAPZA3, CAPZA2, SYNCRIP, CNOT7, RPS2, CTNNBL1, CTNNB1, ACTR3, BAG5, BZW1, KIF2C, RAD21, DYNLL1, DYNLL2, PCBP1, RPLP0, PCBP2, RPL11, RPL12, CSNK1G2, IRGC, SPA17, HNRNPU, ATP6V1F, EIF4A3, RPS18, RPS19, RPS16, SERBP1, ACAP2, CFL1, SLU7, EEF1G, RPS11, RPS15A, RPL36, FKBP1A, STARD10, CAPZB, CALU, HNRNPL, PSMF1, RPS26, HNRNPK, RPL7, EIF3E, RPL8, RAC1, PLCD4, RAB11A, RPS20, PABPC1, …	494	902	15461	2.94933	7.18849e-17	2.39616e-17	2.63663e-16
GOTERM_CC_DIRECT	GO:0005829~cytosol	62	10.7266	1.64942e-06	SAT1, CHMP5, ANKRD2, PRDX5, PGAM2, ZNRF1, CTNNB1, GET4, ACTR3, BAG5, PGP, MAP1LC3A, RHOA, HSP90AA1, FBP1, SKP1, RPS18, CA2, CPLX2, FKBP4, VIM, NT5C1B, ACSBG2, HSPA1A, STARD10, ARPC4, FKBP1A, HSPA1L, RACK1, PSMF1, TPI1, OAZ1, EZR, ARPC2, MTPN, LANCL2, RAC1, PAFAH1B1, UCK2, GAPDH, DNAJA4, ACTB, PHACTR1, EEF1A1, MAT2A, ABHD14B, DPYSL2, SOD1, GABARAP, DNAJB8, LAMP1, NMT1, TBATA, ARF1, PPIA, CALM3, RA…	494	1025	15461	1.89312	0.00062164	5.65287e-05	0.00228077
GOTERM_CC_DIRECT	GO:0005925~focal adhesion	46	7.95848	2.36522e-17	RPL18, KIF22, YWHAZ, VIM, HSPA1A, RDX, RPS2, RPS3, CTNNB1, ACTR3, ACTG1, LPXN, EZR, HNRNPK, CD44, RPL7, ARPC2, RPLP0, RPL8, PCBP2, RAC1, RPLP1, RHOA, RPL12, PAK1, PABPC1, RPL10A, TES, ACTB, RPS9, PPP1CB, YWHAE, RPS5, RPS8, RPS7, RPS18, RPS19, RPL23, RPS16, ARF1, PPIA, CFL1, YWHAQ, HSPB1, RPL37A, RPS11	494	318	15461	4.52732	8.9169e-15	2.22922e-15	3.27059e-14
GOTERM_CC_DIRECT	GO:0005730~nucleolus	46	7.95848	1.13284e-07	MRPL40, RPL18, SPIN1, DEDD, PRRX1, RPL36, RPS3, YBX2, RPS26, SUMO1, EZR, OSR1, RPL7, GATA3, RPL8, RTF1, CHD2, RPL3, SLC25A3, RPL5, THAP1, RPL11, RPL12, RPL10A, NOVA1, RPS23, SRPK2, EEF1A1, RPS9, ABHD14B, RPS6, DDX5, PPP1CB, TNP2, RPS7, UBE2N, RPS19, TXNDC2, RPL23, ILF2, SRSF9, DNAJB1, RPS11, EEF1D, MPHOSPH8, ARL4A	494	605	15461	2.37965	4.2707e-05	4.74531e-06	0.000156646
GOTERM_CC_DIRECT	GO:0005739~mitochondrion	40	6.92042	0.026767	LDHB, YWHAZ, CYB5R2, FDX1, FKBP4, COX7B, ACSBG2, PRDX5, CHCHD2, RPS15A, ROMO1, HSPA1A, CLYBL, ARL2BP, RACK1, BAG5, PKM, DYNLL1, SLC25A3, RAB11A, PDHA2, NRDC, BRI3BP, ALDH5A1, SUCLG2, LYRM4, QDPR, CYB5A, DPYSL2, SOD1, YWHAE, BCL2L11, DCAF5, APOPT1, GLUL, TXNDC2, COX3, PYURF, UBB, AKAP1	494	887	15461	1.41139	0.999964	0.253416	31.2829
GOTERM_CC_DIRECT	GO:0022625~cytosolic large ribosomal subunit	29	5.0173	1.27538e-25	RPL18, RPL19, RPL14, RPL13, RPL35, RPL36, RPL37, RPL38, RPL7, RPL31, RPL6, RPLP0, RPLP1, RPL8, RPL3, RPL10, RPL11, RPL5, RPL12, RPL10A, RPL36AL, RPL35A, RPL26, RPL24, RPL28, RPL29, RPL23, RPL13A, RPL37A	494	63	15461	14.4068	4.80818e-23	4.80818e-23	1.76357e-22
GOTERM_CC_DIRECT	GO:0031012~extracellular matrix	21	3.63322	6.64272e-10	LGALS3, SLC25A6, VIM, RPS15A, EEF2, FKBP1A, SOD1, RPS5, RPS3, RPS7, TGFB2, ACTG1, PKM, RPS18, HNRNPK, RPS16, CFL1, RPL11, RPS20, RPS11, TUBB4B	494	116	15461	5.66594	2.5043e-07	3.57758e-08	9.18542e-07
GOTERM_CC_DIRECT	GO:0048471~perinuclear region of cytoplasm	20	3.46021	0.0279552	PRDX5, HSPA1A, RPS6, S100A14, FXR1, CTNNB1, RACK1, BAG5, TAF10, INHBA, LAMP1, EIF4E, EZR, ARF1, MRFAP1L1, MTPN, RAB11A, RAB15, PAFAH1B1, SLC30A7	494	369	15461	1.69635	0.999977	0.256899	32.434
GOTERM_CC_DIRECT	GO:0022627~cytosolic small ribosomal subunit	19	3.2872	4.88315e-17	RPSA, RPS9, RPS15A, RPS2, RPS6, RPS5, RPS8, RPS3, RPS7, RPS26, RPS18, RPS19, RPS28, RPS16, RPS17, RPS15, RPS20, RPS11, RPS23	494	40	15461	14.8663	1.84095e-14	3.6819e-15	6.75233e-14
GOTERM_CC_DIRECT	GO:0005913~cell-cell adherens junction	16	2.76817	1.98621e-07	YWHAZ, EEF2, RPL24, CDH3, TAGLN2, RPS2, YWHAE, CTNNB1, RPL29, RACK1, EZR, HNRNPK, EIF3E, PCBP1, EEF1D, TES	494	92	15461	5.44306	7.48774e-05	7.48799e-06	0.000274649
GOTERM_CC_DIRECT	GO:0043209~myelin sheath	15	2.59516	0.000166398	ACTB, LDHB, HSP90AA1, RDX, DPYSL2, ACTG1, PKM, GPI, GLUL, EZR, SLC25A3, CA2, TUBA1B, UBA52, TUBB4B	494	141	15461	3.32953	0.0608099	0.00391341	0.229847
Category	Term	Count	%	PValue	Genes	List Total	Pop Hits	Pop Total	Fold Enrichment	Bonferroni	Benjamini	FDR
GOTERM_MF_DIRECT	GO:0044822~poly(A) RNA binding	83	14.3599	2.12038e-19	MRPL40, RPL14, RPL13, UTP18, EIF5, SYNCRIP, YBX1, LSM14A, PKM, BZW1, RPLP0, PCBP2, RTF1, RPL11, EIF1, LSM2, RPL12, PABPN1, SRPK2, KHDRBS3, HSP90AA1, EEF2, HNRNPU, UBE2N, RPS18, RPS19, SEC61B, RPS16, JUN, PEBP1, HSPB1, RPS11, AKAP1, YWHAZ, FKBP4, HDGF, RPL36, RPS15A, RDX, SF3B6, HNRNPL, RACK1, TFAM, SUMO1, HNRNPK, RPS28, EZR, RPL7, DUSP14, EIF3E, RPL8, CSDE1, CHD2, RPS20, HNRNPC, PABPC1, RPL10A, R…	436	840	13095	2.96769	9.22367e-17	4.61184e-17	2.99361e-16
GOTERM_MF_DIRECT	GO:0003735~structural constituent of ribosome	54	9.34256	5.67327e-32	RPL18, RPL19, RPL14, RPL13, RPS2, RPS3, RPLP0, RPLP1, SLC25A3, RPL10, RPL11, RPL12, RPL36AL, RPL35A, SLC25A6, RPS18, RPS19, RPS16, RPS17, RPS14, RPS15, SLC25A39, RPS11, UBA52, RPL35, RPS15A, RPL36, RPL37, RPL38, RPS26, RPS28, RPL7, RPL31, RPL6, RPL8, RPL3, RPL5, RPL10A, RPS20, RPS23, RPSA, RPL26, RPS9, RPL24, RPS6, RPS5, RPL28, RPS8, RPS7, RPL29, RPL23, RPL13A, RPL21, RPL37A	436	212	13095	7.65027	2.46787e-29	2.46787e-29	8.00966e-29
GOTERM_MF_DIRECT	GO:0003677~DNA binding	33	5.70934	0.0137472	HMGN1, KIF22, NACA, HMGB4, DEDD, HDGF, YBX2, RPL7, CSDE1, POLG2, BHLHE41, BAZ2B, CHD5, CHD4, SSRP1, HIST1H2BD, TNP1, POLB, H2AFJ, SIX6, PPARGC1A, TNP2, MPG, ATF4, HILS1, TAF12, ILF2, IRF6, GTF2F1, GTF2F2, PRM1, PRM2, NCOR1	436	640	13095	1.54865	0.997574	0.271612	17.7521
GOTERM_MF_DIRECT	GO:0005515~protein binding	24	4.15225	6.97897e-09	ACTB, EEF1A1, CLTA, HSP90AA1, NCALD, FDX1, FKBP4, VIM, HSPA1A, DPYSL2, SOD1, CAPZB, CTNNB1, ACTR3, INHBA, NPC2, ARF1, MTPN, RAC1, PAFAH1B1, UBB, AHCYL2, PABPC1, GAPDH	436	167	13095	4.31632	3.03585e-06	7.58963e-07	9.85307e-06
GOTERM_MF_DIRECT	GO:0031625~ubiquitin protein ligase binding	21	3.63322	9.36555e-10	YWHAZ, UBE2J1, UBE2V1, UBE2F, CDC34, UBE2B, YWHAE, UBE2R2, UBE2N, ACTG1, HSPA1L, BAG5, ARIH1, GPI, SUMO2, TPI1, SUMO1, MAP1LC3A, UBE2M, MPHOSPH8	436	114	13095	5.53265	4.07401e-07	1.358e-07	1.32225e-06
GOTERM_MF_DIRECT	GO:0003723~RNA binding	20	3.46021	0.00110862	RPL18, PABPN1, RPL13, THUMPD1, RPL37, RPL38, CNOT7, PPARGC1A, YBX1, FXR1, SRSF3, EIF4G2, RPS28, ILF2, PCBP1, RPS15, MEX3C, RPL10A, AKAP1, NOVA1	436	260	13095	2.31034	0.382771	0.0338783	1.55384
GOTERM_MF_DIRECT	GO:0000166~nucleotide binding	17	2.94118	0.0263709	PABPN1, TRA2B, NT5C1B, HDGF, SYNCRIP, SF3B6, IGF2BP3, POLR2D, ELAVL4, PPARGC1A, HNRNPL, SRSF3, ATP2B1, SRSF9, PABPC1, HNRNPC, HNRNPH1	436	282	13095	1.81058	0.999991	0.349859	31.4295
GOTERM_MF_DIRECT	GO:0098641~cadherin binding involved in cell-cell adhesion	15	2.59516	2.09719e-08	YWHAZ, EEF2, RPL24, TAGLN2, RPS2, YWHAE, CTNNB1, RPL29, RACK1, EZR, HNRNPK, EIF3E, PCBP1, EEF1D, TES	436	65	13095	6.93102	9.12274e-06	1.82455e-06	2.96086e-05
GOTERM_MF_DIRECT	GO:0003729~mRNA binding	14	2.42215	2.86353e-05	PAIP2, TRA2B, RPL35, RPS2, ELAVL4, RPS5, FXR1, RPS3, RPS26, EIF4A3, RPL7, RPL13A, HNRNPC, NOVA1	436	101	13095	4.16318	0.0123793	0.00155585	0.0404203
GOTERM_MF_DIRECT	GO:0061630~ubiquitin protein ligase activity	13	2.24913	0.00344566	UBE2N, ARIH1, PELI1, LTN1, UBE2M, UBE2J1, UBE2V1, UBE2F, SKP1, CDC34, ZNRF1, UBE2B, UBE2R2	436	146	13095	2.6743	0.777193	0.0895721	4.75623
GOTERM_MF_DIRECT	GO:0008017~microtubule binding	12	2.07612	2.03269e-05	KIF22, EZR, MAP1LC3A, TPT1, POLB, CETN1, PAFAH1B1, DPYSL2, GAPDH, BCL2L11, GABARAP, RPS3	436	71	13095	5.07624	0.0088033	0.00126239	0.0286941
GOTERM_MF_DIRECT	GO:0003713~transcription coactivator activity	10	1.7301	0.0223913	TAF10, NACA, GATA3, JUN, DDX5, LPIN1, PPARGC1A, ARL2BP, CITED2, CTNNB1	436	124	13095	2.42213	0.999947	0.348385	27.3647
GOTERM_MF_DIRECT	GO:0042802~identical protein binding	10	1.7301	0.0360524	ACTG1, INHBA, GLUL, YWHAZ, MRFAP1L1, VIM, FBP1, CLDN2, THAP1, POLG2	436	135	13095	2.22477	1	0.412815	40.4526
GOTERM_MF_DIRECT	GO:0019843~rRNA binding	9	1.55709	7.24778e-06	RPS18, RPL8, RPS9, RPL37, RPL11, RPL12, RPS11, RPS5, NSUN4	436	32	13095	8.44718	0.00314783	0.000525328	0.0102321
