# Supplementary material for: Cryopreservation process alters the expression of genes involved in pathways associated with the fertility of bull spermatozoa
Source: Front Genet. 2022 Oct 25;13:1025004. doi: 10.3389/fgene.2022.1025004 (PMC9640914; doi:10.3389/fgene.2022.1025004)
Supplement: Supplementary file 2 [file Table3.xlsx]

## Sheet: Down_Pathway
Category	Term	Count	%	PValue	Genes	List Total	Pop Hits	Pop Total	Fold Enrichment	Bonferroni	Benjamini	FDR
KEGG_PATHWAY	bta03010:Ribosome	50	8.65052	2.36716e-38	RPL18, RPL19, RPL14, RPL13, RPS2, RPS3, RPLP0, RPLP1, RPL10, RPL11, RPL12, RPL35A, RPS18, RPS19, RPS16, RPS17, RPS14, RPS15, RPS11, UBA52, RPL35, RPS15A, RPL36, RPL37, RPL38, RPS26, RPS28, RPL7, RPL31, RPL6, RPL8, RPL3, RPL5, RPL10A, RPS20, RPS23, RPSA, RPL26, RPS9, RPL24, RPS6, RPS5, RPL28, RPS8, RPS7, RPL29, RPL23, RPL13A, RPL21, RPL37A	262	134	7550	10.7525	4.87635e-36	4.87635e-36	2.98135e-35
KEGG_PATHWAY	bta05016:Huntington's disease	17	2.94118	0.00140419	NDUFA5, CLTA, COX7A2, SLC25A6, COX7B, MGC148714, COX4I1, COX7A2L, POLR2D, SOD1, PPARGC1A, NDUFB2, SDHB, TFAM, COX3, COX1, CREB3L2	262	199	7550	2.46174	0.251337	0.0470991	1.7542
KEGG_PATHWAY	bta03040:Spliceosome	16	2.76817	3.51463e-05	TRA2B, HSPA1A, SF3B6, DDX5, HNRNPU, CTNNBL1, SRSF3, HSPA1L, EIF4A3, HNRNPK, SRSF9, PCBP1, SLU7, LSM2, HNRNPC	262	129	7550	3.57418	0.00721413	0.00361359	0.0442564
KEGG_PATHWAY	bta04144:Endocytosis	16	2.76817	0.0210324	CLTA, CHMP5, CAPZA3, CAPZA2, KIF5C, HSPA1A, ARPC4, CAPZB, HSPA1L, ARPC1A, ARF1, ARPC2, RHOA, RAB11A, GRK4	262	243	7550	1.8974	0.987461	0.205838	23.4878
KEGG_PATHWAY	bta05010:Alzheimer's disease	15	2.59516	0.00336923	NDUFA5, COX7A2, APH1A, COX7B, MGC148714, COX4I1, COX7A2L, NDUFB2, SDHB, COX3, COX1, CALM3, GAPDH, CALM2, CALM1	262	178	7550	2.42838	0.501042	0.083235	4.16151
KEGG_PATHWAY	bta05205:Proteoglycans in cancer	15	2.59516	0.0105569	ACTB, WNT5A, RDX, DDX5, RPS6, PPP1CB, TGFB2, CTNNB1, ACTG1, EZR, CD44, RAC1, CAMK2D, RHOA, PAK1	262	203	7550	2.12932	0.887667	0.14458	12.5119
KEGG_PATHWAY	bta04810:Regulation of actin cytoskeleton	15	2.59516	0.0150011	ACTB, ARPC4, RDX, MYL12A, PPP1CB, ACTG1, ARPC1A, PFN1, EZR, ARPC2, RAC1, CFL1, RHOA, TMSB4X, PAK1	262	212	7550	2.03892	0.955561	0.167361	17.3342
KEGG_PATHWAY	bta04932:Non-alcoholic fatty liver disease (NAFLD)	14	2.42215	0.00353025	NDUFA5, COX7A2, COX7B, MGC148714, COX4I1, COX7A2L, BCL2L11, NDUFB2, SDHB, ATF4, COX3, JUN, COX1, RAC1	262	160	7550	2.52147	0.517376	0.0777568	4.35634
KEGG_PATHWAY	bta01130:Biosynthesis of antibiotics	14	2.42215	0.0261265	LDHB, SUCLG2, AK1, FBP1, PGAM2, PKM, SDHB, GPI, PGP, TPI1, PHGDH, PDHA2, GAPDH, ENO1	262	206	7550	1.95842	0.995719	0.211099	28.3537
KEGG_PATHWAY	bta05012:Parkinson's disease	13	2.24913	0.00626292	SDHB, NDUFA5, COX7A2, COX3, COX1, SLC25A6, MGC148714, COX7B, UBE2J1, COX4I1, UBB, COX7A2L, NDUFB2	262	152	7550	2.46459	0.725888	0.110998	7.60776
KEGG_PATHWAY	bta04141:Protein processing in endoplasmic reticulum	13	2.24913	0.0139816	HSPA1L, ATF4, HSP90AA1, UBE2D2, SEC61B, BAG1, UBE2J1, HSPA1A, SKP1, DNAJB1, UBXN6, SSR2	262	169	7550	2.21668	0.945006	0.165801	16.2501
KEGG_PATHWAY	bta04922:Glucagon signaling pathway	12	2.07612	0.000406015	PKM, LDHB, ATF4, PHKG2, CAMK2D, CREB3L2, PGAM2, CALM3, PDHA2, PPARGC1A, CALM2, CALM1	262	95	7550	3.64002	0.0802525	0.0206969	0.510159
KEGG_PATHWAY	bta01200:Carbon metabolism	12	2.07612	0.00130287	PKM, SDHB, GPI, TPI1, PGP, SUCLG2, PHGDH, FBP1, PGAM2, PDHA2, GAPDH, ENO1	262	109	7550	3.17249	0.235525	0.0522961	1.62858
KEGG_PATHWAY	bta00190:Oxidative phosphorylation	12	2.07612	0.00900593	ATP6V1C1, SDHB, NDUFA5, COX7A2, COX3, COX1, MGC148714, COX7B, COX4I1, COX7A2L, ATP6V1F, NDUFB2	262	140	7550	2.47001	0.844891	0.133554	10.7689

## Sheet: Up_Pathway
Category	Term	Count	%	PValue	Genes	List Total	Pop Hits	Pop Total	Fold Enrichment	Bonferroni	Benjamini	FDR
KEGG_PATHWAY	bta04722:Neurotrophin signaling pathway	4	3.22581	0.0245269	BEX3, FRS2, ARHGDIB, NGF	39	125	7550	6.19487	0.79593	0.79593	22.297
KEGG_PATHWAY	bta05202:Transcriptional misregulation in cancer	4	3.22581	0.054028	MAF, PDGFA, SIX1, AFF1	39	171	7550	4.52842	0.97141	0.830915	43.1217
KEGG_PATHWAY	bta04080:Neuroactive ligand-receptor interaction	5	4.03226	0.0577331	HTR1A, S1PR5, MC4R, AVPR1A, GRIN3B	39	292	7550	3.31489	0.97776	0.718782	45.3447
