# Supplementary material for: Cryopreservation process alters the expression of genes involved in pathways associated with the fertility of bull spermatozoa
Source: Front Genet. 2022 Oct 25;13:1025004. doi: 10.3389/fgene.2022.1025004 (PMC9640914; doi:10.3389/fgene.2022.1025004)
Supplement: Supplementary file 3 [file Table4.xls]

## Sheet: Downregulated
GOTerm	Nr. Genes	Associated Genes Found
intracellular	455	[ABHD14B, ACP1, ACSBG2, ACTB, ACTG1, ACTL7B, ACTR3, ADIG, ADRM1, AGPAT2, AHCYL2, AK1, AKAP1, AKIRIN2, ALDH5A1, ANKRD2, ANKRD66, APH1A, APOPT1, ARF1, ARIH1, ARL2BP, ARL4A, ARPC1A, ARPC2, ARPC4, ATF4, ATL3, ATP2B1, ATP6V1C1, BAG5, BAZ2B, BCL2L11, BHLHE41, BICD2, BRI3BP, BTF3, BTG1, BZW1, C23H6orf106, C26H10orf120, CA2, CAB39, CABS1, CABYR, CALU, CAMK2D, CAPZA2, CAPZA3, CAPZB, CCDC77, CCNY, CD44, CD…
intracellular part	450	[ABHD14B, ACP1, ACSBG2, ACTB, ACTG1, ACTL7B, ACTR3, ADIG, ADRM1, AGPAT2, AHCYL2, AK1, AKAP1, AKIRIN2, ALDH5A1, ANKRD2, APH1A, APOPT1, ARF1, ARIH1, ARL2BP, ARL4A, ARPC1A, ARPC2, ARPC4, ATF4, ATL3, ATP2B1, ATP6V1C1, BAG5, BAZ2B, BCL2L11, BHLHE41, BICD2, BRI3BP, BTF3, BTG1, BZW1, C23H6orf106, C26H10orf120, CA2, CAB39, CABS1, CABYR, CALU, CAMK2D, CAPZA2, CAPZA3, CAPZB, CCDC77, CCNY, CD44, CDC34, CDKA…
intracellular organelle	396	[ABHD14B, ACSBG2, ACTB, ACTG1, ACTL7B, ACTR3, ADIG, ADRM1, AGPAT2, AHCYL2, AK1, AKAP1, AKIRIN2, ALDH5A1, ANKRD2, APH1A, APOPT1, ARF1, ARIH1, ARL2BP, ARL4A, ARPC1A, ARPC2, ARPC4, ATF4, ATL3, ATP2B1, ATP6V1C1, BAG5, BAZ2B, BCL2L11, BHLHE41, BICD2, BRI3BP, BTG1, C23H6orf106, C26H10orf120, CABS1, CABYR, CALU, CAMK2D, CAPZA2, CAPZA3, CAPZB, CCDC77, CCNY, CD44, CDC34, CDKAL1, CEP41, CETN1, CFL1, CHCHD2…
cytoplasm	371	[ABHD14B, ACP1, ACSBG2, ACTB, ACTG1, ACTL7B, ACTR3, ADIG, ADRM1, AGPAT2, AHCYL2, AK1, AKAP1, ALDH5A1, ANKRD2, APH1A, APOPT1, ARF1, ARIH1, ARL2BP, ARL4A, ARPC1A, ARPC2, ARPC4, ATF4, ATL3, ATP6V1C1, BAG5, BCL2L11, BICD2, BRI3BP, BTF3, BTG1, BZW1, C23H6orf106, CA2, CAB39, CABS1, CABYR, CALU, CAMK2D, CAPZA2, CAPZA3, CAPZB, CCNY, CD44, CDC34, CDKAL1, CEP41, CETN1, CFL1, CHCHD2, CHD4, CHD5, CHIC2, CHMP…
cytoplasm	371	[ABHD14B, ACP1, ACSBG2, ACTB, ACTG1, ACTL7B, ACTR3, ADIG, ADRM1, AGPAT2, AHCYL2, AK1, AKAP1, ALDH5A1, ANKRD2, APH1A, APOPT1, ARF1, ARIH1, ARL2BP, ARL4A, ARPC1A, ARPC2, ARPC4, ATF4, ATL3, ATP6V1C1, BAG5, BCL2L11, BICD2, BRI3BP, BTF3, BTG1, BZW1, C23H6orf106, CA2, CAB39, CABS1, CABYR, CALU, CAMK2D, CAPZA2, CAPZA3, CAPZB, CCNY, CD44, CDC34, CDKAL1, CEP41, CETN1, CFL1, CHCHD2, CHD4, CHD5, CHIC2, CHMP…
intracellular membrane-bounded organelle	328	[ABHD14B, ACSBG2, ACTB, ACTG1, ADIG, ADRM1, AGPAT2, AHCYL2, AKAP1, AKIRIN2, ALDH5A1, ANKRD2, APH1A, APOPT1, ARF1, ARIH1, ARL2BP, ARL4A, ATF4, ATL3, ATP2B1, ATP6V1C1, BAG5, BAZ2B, BCL2L11, BHLHE41, BICD2, BRI3BP, BTG1, C23H6orf106, C26H10orf120, CABS1, CABYR, CALU, CAMK2D, CAPZA3, CCNY, CD44, CDC34, CDKAL1, CFL1, CHCHD2, CHD2, CHD4, CHD5, CHIC2, CHMP5, CISD1, CITED2, CLPP, CLTA, CLYBL, CNDP2, CNOT…
cytoplasmic part	296	[ABHD14B, ACP1, ACSBG2, ACTB, ACTG1, ACTR3, ADRM1, AGPAT2, AHCYL2, AK1, AKAP1, ALDH5A1, ANKRD2, APH1A, APOPT1, ARF1, ARL2BP, ARL4A, ARPC2, ARPC4, ATL3, ATP6V1C1, BAG5, BCL2L11, BICD2, BRI3BP, BTF3, C23H6orf106, CA2, CABS1, CABYR, CALU, CAMK2D, CAPZA2, CAPZA3, CAPZB, CCNY, CD44, CDC34, CDKAL1, CEP41, CETN1, CFL1, CHCHD2, CHD5, CHIC2, CHMP5, CISD1, CLPP, CLTA, CLYBL, CNDP2, CNOT7, COQ10B, COX1, COX…
cytoplasmic part	296	[ABHD14B, ACP1, ACSBG2, ACTB, ACTG1, ACTR3, ADRM1, AGPAT2, AHCYL2, AK1, AKAP1, ALDH5A1, ANKRD2, APH1A, APOPT1, ARF1, ARL2BP, ARL4A, ARPC2, ARPC4, ATL3, ATP6V1C1, BAG5, BCL2L11, BICD2, BRI3BP, BTF3, C23H6orf106, CA2, CABS1, CABYR, CALU, CAMK2D, CAPZA2, CAPZA3, CAPZB, CCNY, CD44, CDC34, CDKAL1, CEP41, CETN1, CFL1, CHCHD2, CHD5, CHIC2, CHMP5, CISD1, CLPP, CLTA, CLYBL, CNDP2, CNOT7, COQ10B, COX1, COX…
cellular macromolecule metabolic process	276	[ABHD14B, ACP1, ADRM1, AKIRIN2, ANKRD2, APH1A, APOPT1, ARF1, ARIH1, ARL2BP, ASPDH, ATF4, BAG5, BCL2L11, BHLHE41, BTG1, CAB39, CAMK2D, CCL14, CCNY, CD44, CDC34, CDKAL1, CEP41, CFL1, CHCHD2, CHD5, CHMP5, CITED2, CLPP, CNOT7, CREB3L2, CSDE1, CSNK1G2, CTNNB1, CTNNBL1, DBIL5, DCUN1D1, DCUN1D5, DDX5, DEDD, DLX5, DNAJB1, DPM3, DUSP14, DYNLL1, EEF1A1, EEF1D, EEF1G, EEF2, EFNA1, EIF1, EIF3E, EIF3I, EIF4A3…
intracellular organelle part	272	[ABHD14B, ACTB, ACTG1, ACTR3, ADRM1, AK1, AKIRIN2, ANKRD2, ARIH1, ARL2BP, ARL4A, ARPC1A, ARPC2, ARPC4, ATF4, ATL3, ATP6V1C1, BCL2L11, BICD2, CABS1, CALU, CAMK2D, CAPZA2, CAPZA3, CAPZB, CCDC77, CDC34, CEP41, CETN1, CFL1, CHCHD2, CHD2, CHD4, CHD5, CISD1, CITED2, CLPP, CLTA, CNDP2, CNOT7, COX1, COX4I1, COX7A2, COX7A2L, COX7B, CREB3L2, CSDE1, CTNNB1, CTNNBL1, CWC25, CYB5A, CYLC1, CYLC2, DAZAP2, DCAF1…
intracellular organelle part	272	[ABHD14B, ACTB, ACTG1, ACTR3, ADRM1, AK1, AKIRIN2, ANKRD2, ARIH1, ARL2BP, ARL4A, ARPC1A, ARPC2, ARPC4, ATF4, ATL3, ATP6V1C1, BCL2L11, BICD2, CABS1, CALU, CAMK2D, CAPZA2, CAPZA3, CAPZB, CCDC77, CDC34, CEP41, CETN1, CFL1, CHCHD2, CHD2, CHD4, CHD5, CISD1, CITED2, CLPP, CLTA, CNDP2, CNOT7, COX1, COX4I1, COX7A2, COX7A2L, COX7B, CREB3L2, CSDE1, CTNNB1, CTNNBL1, CWC25, CYB5A, CYLC1, CYLC2, DAZAP2, DCAF1…
nucleus	246	[ABHD14B, ACTB, ACTG1, ADIG, ADRM1, AKIRIN2, ANKRD2, ARIH1, ARL2BP, ARL4A, ATF4, ATP2B1, BAG5, BAZ2B, BHLHE41, BICD2, BTG1, C26H10orf120, CABYR, CAPZA3, CCNY, CDC34, CFL1, CHCHD2, CHD2, CHD4, CHD5, CHMP5, CITED2, CNDP2, CNOT7, COX4I1, COX7A2L, CPNE2, CREB3L2, CSNK1G2, CTNNB1, CTNNBL1, CWC25, CYB5R2, CYLC1, CYLC2, DAZAP2, DDX5, DEDD, DLX5, DNAJB1, DNAJB8, DYNLL1, DYNLL2, EEF1A1, EEF1G, EEF2, EIF3E…
organonitrogen compound metabolic process	230	[ACP1, ADRM1, AHCYL2, AK1, ALDH5A1, ALLC, APH1A, APOPT1, ARIH1, ARL2BP, ASPDH, BAG5, BCL2L11, BTG1, CAB39, CAMK2D, CCL14, CCNY, CD44, CDC34, CDKAL1, CEP41, CFL1, CHD5, CLPP, CNDP2, CNOT7, COX1, COX4I1, COX7A2L, CSNK1G2, CTNNB1, DBIL5, DCUN1D1, DCUN1D5, DDX5, DEDD, DNPEP, DPM3, DUSP14, EEF1A1, EEF1D, EEF1G, EEF2, EFNA1, EIF1, EIF3E, EIF3I, EIF4A3, EIF4E, EIF4G2, EIF5, EIF5A, ENO1, EZR, FAU, FBP1, …
organonitrogen compound metabolic process	230	[ACP1, ADRM1, AHCYL2, AK1, ALDH5A1, ALLC, APH1A, APOPT1, ARIH1, ARL2BP, ASPDH, BAG5, BCL2L11, BTG1, CAB39, CAMK2D, CCL14, CCNY, CD44, CDC34, CDKAL1, CEP41, CFL1, CHD5, CLPP, CNDP2, CNOT7, COX1, COX4I1, COX7A2L, CSNK1G2, CTNNB1, DBIL5, DCUN1D1, DCUN1D5, DDX5, DEDD, DNPEP, DPM3, DUSP14, EEF1A1, EEF1D, EEF1G, EEF2, EFNA1, EIF1, EIF3E, EIF3I, EIF4A3, EIF4E, EIF4G2, EIF5, EIF5A, ENO1, EZR, FAU, FBP1, …
cellular nitrogen compound metabolic process	222	[ABHD14B, ADRM1, AHCYL2, AK1, AKIRIN2, ALDH5A1, ALLC, ANKRD2, APH1A, ARL2BP, ASPDH, ATF4, BHLHE41, CDKAL1, CHCHD2, CHD5, CITED2, CNOT7, COX1, COX4I1, COX7A2L, CREB3L2, CSDE1, CTNNB1, CTNNBL1, DDX5, DEDD, DLX5, DNAJB1, DNPEP, DYNLL1, EEF1A1, EEF1D, EEF1G, EEF2, EFNA1, EIF1, EIF3E, EIF3I, EIF4A3, EIF4E, EIF4G2, EIF5, EIF5A, ELF5, ELMSAN1, ELP5, ENO1, EZR, FAU, FBP1, FDXACB1, FOXP1, FXR1, GAPDH, GAP…
organic substance biosynthetic process	208	[ABHD14B, ADRM1, AGPAT2, AK1, AKIRIN2, ANKRD2, ARL2BP, ASPDH, ATF4, BHLHE41, CDH3, CDKAL1, CHCHD2, CHD5, CITED2, CNOT7, COQ10B, CREB3L2, CSDE1, CTNNB1, DDX5, DEDD, DKKL1, DLX5, DNAJB1, DPM3, DYNLL1, EEF1A1, EEF1D, EEF1G, EEF2, EFNA1, EIF1, EIF3E, EIF3I, EIF4A3, EIF4E, EIF4G2, EIF5, EIF5A, ELF5, ELMSAN1, EZR, FAU, FBP1, FDX1, FDXACB1, FOXP1, FXR1, GAPDH, GATA3, GLS, GLUL, GPAT3, GPI, GPS2, GTF2F1,…
intracellular non-membrane-bounded organelle	203	[ABHD14B, ACTB, ACTG1, ACTL7B, ACTR3, ADIG, AK1, ANKRD2, ARF1, ARL2BP, ARL4A, ARPC1A, ARPC2, ARPC4, ATF4, BCL2L11, BICD2, CAPZA2, CAPZA3, CAPZB, CCDC77, CEP41, CETN1, CFL1, CHD2, CHD4, CITED2, CLTA, CNOT7, COX7A2L, CTNNB1, CYLC1, CYLC2, DCAF12, DDX5, DEDD, DLX5, DNAJB1, DPYSL2, DYNLL1, DYNLL2, EEF1A1, EIF4A3, EIF4E, EZR, FAU, FKBP1A, FKBP4, FXR1, GABARAP, GAPDH, GATA3, GET4, GTF2F2, H2AFJ, H3F3A,…
intracellular non-membrane-bounded organelle	203	[ABHD14B, ACTB, ACTG1, ACTL7B, ACTR3, ADIG, AK1, ANKRD2, ARF1, ARL2BP, ARL4A, ARPC1A, ARPC2, ARPC4, ATF4, BCL2L11, BICD2, CAPZA2, CAPZA3, CAPZB, CCDC77, CEP41, CETN1, CFL1, CHD2, CHD4, CITED2, CLTA, CNOT7, COX7A2L, CTNNB1, CYLC1, CYLC2, DCAF12, DDX5, DEDD, DLX5, DNAJB1, DPYSL2, DYNLL1, DYNLL2, EEF1A1, EIF4A3, EIF4E, EZR, FAU, FKBP1A, FKBP4, FXR1, GABARAP, GAPDH, GATA3, GET4, GTF2F2, H2AFJ, H3F3A,…
protein metabolic process	203	[ACP1, ADRM1, APH1A, APOPT1, ARIH1, ARL2BP, ASPDH, BAG5, BCL2L11, BTG1, CAB39, CAMK2D, CCL14, CCNY, CD44, CDC34, CDKAL1, CEP41, CFL1, CHD5, CLPP, CNDP2, CNOT7, CSNK1G2, CTNNB1, DBIL5, DCUN1D1, DCUN1D5, DDX5, DEDD, DNPEP, DPM3, DUSP14, EEF1A1, EEF1D, EEF1G, EEF2, EFNA1, EIF1, EIF3E, EIF3I, EIF4A3, EIF4E, EIF4G2, EIF5, EIF5A, EZR, FAU, FBXO8, FDXACB1, FKBP1A, FKBP4, FXR1, GAPDH, GATA3, GET4, GPS2, …
intracellular non-membrane-bounded organelle	203	[ABHD14B, ACTB, ACTG1, ACTL7B, ACTR3, ADIG, AK1, ANKRD2, ARF1, ARL2BP, ARL4A, ARPC1A, ARPC2, ARPC4, ATF4, BCL2L11, BICD2, CAPZA2, CAPZA3, CAPZB, CCDC77, CEP41, CETN1, CFL1, CHD2, CHD4, CITED2, CLTA, CNOT7, COX7A2L, CTNNB1, CYLC1, CYLC2, DCAF12, DDX5, DEDD, DLX5, DNAJB1, DPYSL2, DYNLL1, DYNLL2, EEF1A1, EIF4A3, EIF4E, EZR, FAU, FKBP1A, FKBP4, FXR1, GABARAP, GAPDH, GATA3, GET4, GTF2F2, H2AFJ, H3F3A,…
protein metabolic process	203	[ACP1, ADRM1, APH1A, APOPT1, ARIH1, ARL2BP, ASPDH, BAG5, BCL2L11, BTG1, CAB39, CAMK2D, CCL14, CCNY, CD44, CDC34, CDKAL1, CEP41, CFL1, CHD5, CLPP, CNDP2, CNOT7, CSNK1G2, CTNNB1, DBIL5, DCUN1D1, DCUN1D5, DDX5, DEDD, DNPEP, DPM3, DUSP14, EEF1A1, EEF1D, EEF1G, EEF2, EFNA1, EIF1, EIF3E, EIF3I, EIF4A3, EIF4E, EIF4G2, EIF5, EIF5A, EZR, FAU, FBXO8, FDXACB1, FKBP1A, FKBP4, FXR1, GAPDH, GATA3, GET4, GPS2, …
intracellular non-membrane-bounded organelle	203	[ABHD14B, ACTB, ACTG1, ACTL7B, ACTR3, ADIG, AK1, ANKRD2, ARF1, ARL2BP, ARL4A, ARPC1A, ARPC2, ARPC4, ATF4, BCL2L11, BICD2, CAPZA2, CAPZA3, CAPZB, CCDC77, CEP41, CETN1, CFL1, CHD2, CHD4, CITED2, CLTA, CNOT7, COX7A2L, CTNNB1, CYLC1, CYLC2, DCAF12, DDX5, DEDD, DLX5, DNAJB1, DPYSL2, DYNLL1, DYNLL2, EEF1A1, EIF4A3, EIF4E, EZR, FAU, FKBP1A, FKBP4, FXR1, GABARAP, GAPDH, GATA3, GET4, GTF2F2, H2AFJ, H3F3A,…
cellular biosynthetic process	202	[ABHD14B, ADRM1, AGPAT2, AK1, AKIRIN2, ANKRD2, ARL2BP, ASPDH, ATF4, BHLHE41, CDH3, CDKAL1, CHCHD2, CHD5, CITED2, CNOT7, COQ10B, CREB3L2, CSDE1, CTNNB1, DDX5, DEDD, DKKL1, DLX5, DNAJB1, DPM3, DYNLL1, EEF1A1, EEF1D, EEF1G, EEF2, EFNA1, EIF1, EIF3E, EIF3I, EIF4A3, EIF4E, EIF4G2, EIF5, EIF5A, ELF5, ELMSAN1, EZR, FAU, FBP1, FDXACB1, FOXP1, FXR1, GAPDH, GATA3, GLS, GLUL, GPAT3, GPS2, GTF2F1, GTF2F2, H2…
cellular protein metabolic process	193	[ACP1, ADRM1, APH1A, APOPT1, ARIH1, ARL2BP, ASPDH, BAG5, BCL2L11, BTG1, CAB39, CAMK2D, CCL14, CCNY, CD44, CDC34, CDKAL1, CEP41, CFL1, CHD5, CLPP, CNOT7, CSNK1G2, CTNNB1, DBIL5, DCUN1D1, DCUN1D5, DDX5, DPM3, DUSP14, EEF1A1, EEF1D, EEF1G, EEF2, EFNA1, EIF1, EIF3E, EIF3I, EIF4A3, EIF4E, EIF4G2, EIF5, EIF5A, EZR, FAU, FBXO8, FDXACB1, FKBP1A, FKBP4, FXR1, GAPDH, GATA3, GET4, GPS2, GRK4, HABP4, HAND2, …
gene expression	193	[ABHD14B, ADRM1, AKIRIN2, ANKRD2, APH1A, ATF4, BHLHE41, CDH3, CDKAL1, CHCHD2, CHD5, CITED2, CNOT7, CREB3L2, CSDE1, CTNNB1, CTNNBL1, DDX5, DEDD, DLX5, DNAJB1, DYNLL1, EEF1A1, EEF1D, EEF1G, EEF2, EFNA1, EIF1, EIF3E, EIF3I, EIF4A3, EIF4E, EIF4G2, EIF5, EIF5A, ELF5, ELMSAN1, ELP5, EZR, FAU, FBP1, FDXACB1, FOXP1, FXR1, GAPDH, GATA3, GPS2, GTF2F1, GTF2F2, H2AFJ, HABP4, HAND2, HDGF, HMGB1, HMGB3, HNRNPH…
cellular protein metabolic process	193	[ACP1, ADRM1, APH1A, APOPT1, ARIH1, ARL2BP, ASPDH, BAG5, BCL2L11, BTG1, CAB39, CAMK2D, CCL14, CCNY, CD44, CDC34, CDKAL1, CEP41, CFL1, CHD5, CLPP, CNOT7, CSNK1G2, CTNNB1, DBIL5, DCUN1D1, DCUN1D5, DDX5, DPM3, DUSP14, EEF1A1, EEF1D, EEF1G, EEF2, EFNA1, EIF1, EIF3E, EIF3I, EIF4A3, EIF4E, EIF4G2, EIF5, EIF5A, EZR, FAU, FBXO8, FDXACB1, FKBP1A, FKBP4, FXR1, GAPDH, GATA3, GET4, GPS2, GRK4, HABP4, HAND2, …
macromolecule biosynthetic process	182	[ABHD14B, ADRM1, AKIRIN2, ANKRD2, ARL2BP, ATF4, BHLHE41, CDKAL1, CHCHD2, CHD5, CITED2, CNOT7, CREB3L2, CSDE1, CTNNB1, DDX5, DEDD, DLX5, DNAJB1, DPM3, DYNLL1, EEF1A1, EEF1D, EEF1G, EEF2, EFNA1, EIF1, EIF3E, EIF3I, EIF4A3, EIF4E, EIF4G2, EIF5, EIF5A, ELF5, ELMSAN1, EZR, FAU, FBP1, FDXACB1, FOXP1, FXR1, GAPDH, GATA3, GPS2, GTF2F1, GTF2F2, H2AFJ, HABP4, HAND2, HAS2, HDGF, HMGB1, HMGB3, HNRNPK, HNRNPU…
nucleic acid binding	178	[ACTB, AKAP1, ARF1, ATF4, BAZ2B, BHLHE41, BTF3, BZW1, CHCHD2, CHD2, CHD4, CNOT7, CREB3L2, CSDE1, CTNNB1, DDX5, DEDD, DLX5, DUSP14, EEF1A1, EEF1D, EEF1G, EEF2, EIF1, EIF3E, EIF3I, EIF4A3, EIF4E, EIF4G2, EIF5, EIF5A, ELAVL4, ELF5, ELMSAN1, EZR, FAU, FKBP4, FOXP1, FXR1, GATA3, GTF2F1, GTF2F2, H2AFJ, H3F3A, HAND2, HDGF, HILS1, HIST1H2BD, HMGB1, HMGB3, HMGB4, HMGN1, HNRNPC, HNRNPH1, HNRNPK, HNRNPL, HN…
nucleic acid binding	178	[ACTB, AKAP1, ARF1, ATF4, BAZ2B, BHLHE41, BTF3, BZW1, CHCHD2, CHD2, CHD4, CNOT7, CREB3L2, CSDE1, CTNNB1, DDX5, DEDD, DLX5, DUSP14, EEF1A1, EEF1D, EEF1G, EEF2, EIF1, EIF3E, EIF3I, EIF4A3, EIF4E, EIF4G2, EIF5, EIF5A, ELAVL4, ELF5, ELMSAN1, EZR, FAU, FKBP4, FOXP1, FXR1, GATA3, GTF2F1, GTF2F2, H2AFJ, H3F3A, HAND2, HDGF, HILS1, HIST1H2BD, HMGB1, HMGB3, HMGB4, HMGN1, HNRNPC, HNRNPH1, HNRNPK, HNRNPL, HN…
cellular nitrogen compound biosynthetic process	178	[ABHD14B, ADRM1, AK1, AKIRIN2, ANKRD2, ARL2BP, ASPDH, ATF4, BHLHE41, CDKAL1, CHCHD2, CHD5, CITED2, CNOT7, CREB3L2, CSDE1, CTNNB1, DDX5, DEDD, DLX5, DNAJB1, DYNLL1, EEF1A1, EEF1D, EEF1G, EEF2, EFNA1, EIF1, EIF3E, EIF3I, EIF4A3, EIF4E, EIF4G2, EIF5, EIF5A, ELF5, ELMSAN1, EZR, FAU, FBP1, FDXACB1, FOXP1, FXR1, GAPDH, GATA3, GPS2, GTF2F1, GTF2F2, H2AFJ, HABP4, HAND2, HDGF, HMGB1, HMGB3, HNRNPK, HNRNPU…
cellular macromolecule biosynthetic process	178	[ABHD14B, ADRM1, AKIRIN2, ANKRD2, ATF4, BHLHE41, CDKAL1, CHCHD2, CHD5, CITED2, CNOT7, CREB3L2, CSDE1, CTNNB1, DDX5, DEDD, DLX5, DNAJB1, DPM3, DYNLL1, EEF1A1, EEF1D, EEF1G, EEF2, EFNA1, EIF1, EIF3E, EIF3I, EIF4A3, EIF4E, EIF4G2, EIF5, EIF5A, ELF5, ELMSAN1, EZR, FAU, FBP1, FDXACB1, FOXP1, FXR1, GAPDH, GATA3, GPS2, GTF2F1, GTF2F2, H2AFJ, HABP4, HAND2, HAS2, HDGF, HMGB1, HMGB3, HNRNPK, HNRNPU, HSP90A…
cytosol	165	[ABHD14B, ACP1, ACSBG2, ACTB, ACTR3, ADRM1, AHCYL2, AK1, ANKRD2, ARF1, ARL4A, ARPC2, ARPC4, BAG5, BICD2, BTF3, CA2, CABYR, CD44, CDC34, CHD5, CHMP5, CNDP2, CPLX2, CSDE1, CTNNB1, CYB5A, DNAJA4, DNAJB8, DNPEP, DPYSL2, EIF3E, EIF4E, EIF5, ELP5, ENO1, EZR, FAU, FBP1, FKBP1A, FKBP4, FXR1, GABARAP, GAPDH, GET4, GLUL, GPI, GSDME, HABP4, HIST1H2BD, HNRNPH1, HSP90AA1, HSPA1L, IGF2BP3, IRF6, KIF22, KIF2C, …
vesicle	147	[ABHD14B, ACP1, ACTB, ACTG1, ACTR3, ARF1, ARPC1A, ARPC2, ARPC4, ATP2B1, ATP6V1C1, BICD2, CA2, CAB39, CALU, CAPZA2, CAPZA3, CAPZB, CCNY, CD44, CFL1, CHD2, CHIC2, CHMP5, CISD1, CLDN2, CLTA, CNDP2, COX4I1, CPNE2, CTNNB1, CYB5A, CYLC1, DDX5, DKKL1, DYNLL1, EEF1G, EFNA1, EIF3E, EIF3I, EIF4E, EIF5A, EZR, FBP1, FKBP1A, FKBP4, GABARAP, GLUL, GPI, GSTO2, H2AFJ, H3F3A, HIST1H2BD, HMGB1, HNRNPK, HNRNPL, HSP…
extracellular space	140	[ABHD14B, ACP1, ACTB, ACTG1, ACTR3, ARF1, ARPC1A, ARPC2, ARPC4, ATP2B1, ATP6V1C1, CA2, CAB39, CAPZA2, CCL14, CCNY, CD44, CFL1, CHD2, CHMP5, CISD1, CLDN2, CNDP2, COX4I1, CPNE2, CTNNB1, CYB5A, DDX5, DYNLL1, EEF1G, EFNA1, EIF3E, EIF3I, EIF4E, EIF5A, EZR, FAU, FBP1, FKBP1A, FKBP4, GLUL, GPI, GSTO2, H2AFJ, H3F3A, HDGF, HIST1H2BD, HMGB1, HNRNPK, HNRNPL, HSP90AA1, HSPA1L, HSPB1, INHBA, IRF6, KIT, KRT24,…
organelle organization	131	[ACTB, ACTG1, ACTR3, APOPT1, ARF1, ARPC1A, ARPC2, ARPC4, ATL3, BAG5, BCL2L11, BICD2, CAPZA2, CAPZA3, CAPZB, CEP41, CFL1, CHCHD2, CHD4, CHD5, CHMP5, CNOT7, COX7A2L, CTNNB1, CYLC1, CYLC2, DPYSL2, DYNLL1, DYNLL2, EZR, FKBP4, FOXP1, FUNDC2, GABARAP, GAPDH, GATA3, GET4, H2AFJ, H3F3A, HILS1, HIST1H2BD, HMGB1, HMGB3, HNRNPU, HSP90AA1, HSPA1A, HSPA1L, KIF22, KIF2C, KIT, LIMCH1, LSM14A, MAP1LC3A, MAP7, ML…
nuclear part	131	[ABHD14B, ACTB, ADRM1, AKIRIN2, ANKRD2, ARIH1, ARL4A, ATF4, BICD2, CDC34, CFL1, CHD2, CHD4, CHD5, CITED2, CNDP2, CNOT7, COX7A2L, CREB3L2, CTNNB1, CTNNBL1, CWC25, DAZAP2, DDX5, DEDD, DLX5, DNAJB1, DYNLL1, EEF1A1, EIF3E, EIF4A3, EIF5A, ELMSAN1, EZR, FKBP4, FOXP1, GATA3, GET4, GPATCH2, GPI, GTF2F2, H2AFJ, H3F3A, HABP4, HAND2, HDGF, HEMGN, HIST1H2BD, HMGB1, HNRNPH1, HNRNPK, HNRNPL, HNRNPU, HSPA1L, IL…
organelle organization	131	[ACTB, ACTG1, ACTR3, APOPT1, ARF1, ARPC1A, ARPC2, ARPC4, ATL3, BAG5, BCL2L11, BICD2, CAPZA2, CAPZA3, CAPZB, CEP41, CFL1, CHCHD2, CHD4, CHD5, CHMP5, CNOT7, COX7A2L, CTNNB1, CYLC1, CYLC2, DPYSL2, DYNLL1, DYNLL2, EZR, FKBP4, FOXP1, FUNDC2, GABARAP, GAPDH, GATA3, GET4, H2AFJ, H3F3A, HILS1, HIST1H2BD, HMGB1, HMGB3, HNRNPU, HSP90AA1, HSPA1A, HSPA1L, KIF22, KIF2C, KIT, LIMCH1, LSM14A, MAP1LC3A, MAP7, ML…
extracellular organelle	127	[ABHD14B, ACP1, ACTB, ACTG1, ACTR3, ARF1, ARPC1A, ARPC2, ARPC4, ATP2B1, ATP6V1C1, CA2, CAB39, CAPZA2, CCNY, CD44, CFL1, CHD2, CHMP5, CISD1, CLDN2, CNDP2, COX4I1, CPNE2, CTNNB1, CYB5A, DDX5, DYNLL1, EEF1G, EFNA1, EIF3E, EIF3I, EIF4E, EIF5A, EZR, FBP1, FKBP1A, FKBP4, GLUL, GPI, GSTO2, H2AFJ, H3F3A, HIST1H2BD, HNRNPK, HNRNPL, HSP90AA1, HSPB1, IRF6, KRT24, LAMP1, LDHB, LGALS3, MPHOSPH8, MTPN, NCALD, …
extracellular vesicle	127	[ABHD14B, ACP1, ACTB, ACTG1, ACTR3, ARF1, ARPC1A, ARPC2, ARPC4, ATP2B1, ATP6V1C1, CA2, CAB39, CAPZA2, CCNY, CD44, CFL1, CHD2, CHMP5, CISD1, CLDN2, CNDP2, COX4I1, CPNE2, CTNNB1, CYB5A, DDX5, DYNLL1, EEF1G, EFNA1, EIF3E, EIF3I, EIF4E, EIF5A, EZR, FBP1, FKBP1A, FKBP4, GLUL, GPI, GSTO2, H2AFJ, H3F3A, HIST1H2BD, HNRNPK, HNRNPL, HSP90AA1, HSPB1, IRF6, KRT24, LAMP1, LDHB, LGALS3, MPHOSPH8, MTPN, NCALD, …
extracellular exosome	127	[ABHD14B, ACP1, ACTB, ACTG1, ACTR3, ARF1, ARPC1A, ARPC2, ARPC4, ATP2B1, ATP6V1C1, CA2, CAB39, CAPZA2, CCNY, CD44, CFL1, CHD2, CHMP5, CISD1, CLDN2, CNDP2, COX4I1, CPNE2, CTNNB1, CYB5A, DDX5, DYNLL1, EEF1G, EFNA1, EIF3E, EIF3I, EIF4E, EIF5A, EZR, FBP1, FKBP1A, FKBP4, GLUL, GPI, GSTO2, H2AFJ, H3F3A, HIST1H2BD, HNRNPK, HNRNPL, HSP90AA1, HSPB1, IRF6, KRT24, LAMP1, LDHB, LGALS3, MPHOSPH8, MTPN, NCALD, …
RNA binding	123	[AKAP1, ARF1, BTF3, BZW1, CHD2, CNOT7, CSDE1, DDX5, DUSP14, EEF1A1, EEF1D, EEF1G, EEF2, EIF1, EIF3E, EIF3I, EIF4A3, EIF4E, EIF4G2, EIF5, EIF5A, ELAVL4, EZR, FAU, FKBP4, FXR1, HDGF, HMGB1, HNRNPC, HNRNPH1, HNRNPK, HNRNPL, HNRNPU, HSP90AA1, HSPB1, IGF2BP3, ILF2, JUN, KHDRBS3, LGALS3, LOC100299503, LSM14A, LSM2, MEX3C, MRPL40, NOP10, NOVA1, NSUN4, PABPC1, PABPN1, PAIP2, PCBP1, PCBP2, PEBP1, POLR2D, …
nuclear lumen	116	[ABHD14B, ACTB, ADRM1, AKIRIN2, ANKRD2, ARIH1, ARL4A, ATF4, CDC34, CFL1, CHD2, CHD4, CHD5, CITED2, CNDP2, CNOT7, COX7A2L, CREB3L2, CTNNB1, CTNNBL1, CWC25, DAZAP2, DDX5, DEDD, DLX5, DNAJB1, EEF1A1, EIF3E, EIF4A3, ELMSAN1, EZR, FKBP4, FOXP1, GATA3, GET4, GPATCH2, GPI, GTF2F2, H2AFJ, H3F3A, HABP4, HAND2, HDGF, HEMGN, HIST1H2BD, HMGB1, HNRNPH1, HNRNPK, HNRNPL, HNRNPU, ILF2, JPT1, JUN, KHDRBS3, KIF22,…
nuclear lumen	116	[ABHD14B, ACTB, ADRM1, AKIRIN2, ANKRD2, ARIH1, ARL4A, ATF4, CDC34, CFL1, CHD2, CHD4, CHD5, CITED2, CNDP2, CNOT7, COX7A2L, CREB3L2, CTNNB1, CTNNBL1, CWC25, DAZAP2, DDX5, DEDD, DLX5, DNAJB1, EEF1A1, EIF3E, EIF4A3, ELMSAN1, EZR, FKBP4, FOXP1, GATA3, GET4, GPATCH2, GPI, GTF2F2, H2AFJ, H3F3A, HABP4, HAND2, HDGF, HEMGN, HIST1H2BD, HMGB1, HNRNPH1, HNRNPK, HNRNPL, HNRNPU, ILF2, JPT1, JUN, KHDRBS3, KIF22,…
cellular component assembly	105	[ACTG1, ACTR3, ADRM1, ALDH5A1, ARF1, ARPC1A, ARPC2, ARPC4, ATL3, BAG5, BCL2L11, CAPZA2, CAPZA3, CAPZB, CEP41, CHMP5, CLTA, CNOT7, COX3, COX7A2L, CTNNB1, DNAJA4, DNAJB8, DYNLL1, DYNLL2, EZR, FBP1, FKBP1A, FKBP4, FOXP1, GABARAP, GAP43, GLS, GTF2F2, H3F3A, HAS2, HILS1, HIST1H2BD, HMGB1, HNRNPU, HSP90AA1, HSPA1A, JUN, KCNA4, KHDRBS3, KIT, LMO4, LSM14A, MAP1LC3A, MAT2A, MTPN, NCOR1, NDUFA5, NDUFB2, NS…
cellular component assembly	105	[ACTG1, ACTR3, ADRM1, ALDH5A1, ARF1, ARPC1A, ARPC2, ARPC4, ATL3, BAG5, BCL2L11, CAPZA2, CAPZA3, CAPZB, CEP41, CHMP5, CLTA, CNOT7, COX3, COX7A2L, CTNNB1, DNAJA4, DNAJB8, DYNLL1, DYNLL2, EZR, FBP1, FKBP1A, FKBP4, FOXP1, GABARAP, GAP43, GLS, GTF2F2, H3F3A, HAS2, HILS1, HIST1H2BD, HMGB1, HNRNPU, HSP90AA1, HSPA1A, JUN, KCNA4, KHDRBS3, KIT, LMO4, LSM14A, MAP1LC3A, MAT2A, MTPN, NCOR1, NDUFA5, NDUFB2, NS…
organonitrogen compound biosynthetic process	102	[ASPDH, CDKAL1, CNOT7, CTNNB1, DDX5, DPM3, EEF1A1, EEF1D, EEF1G, EEF2, EIF1, EIF3E, EIF3I, EIF4A3, EIF4E, EIF4G2, EIF5, EIF5A, FAU, FDXACB1, FXR1, GAPDH, GATA3, GLS, GLUL, HABP4, HAND2, HAS2, HNRNPK, INHBA, LSM14A, NCOR1, NMT1, NSUN4, OAZ1, PAIP2, PHGDH, POLG2, POLR2D, PPARGC1A, PYURF, QDPR, RACK1, RPL10, RPL10A, RPL11, RPL12, RPL13, RPL13A, RPL14, RPL18, RPL19, RPL21, RPL22, RPL23, RPL24, RPL26,…
positive regulation of macromolecule metabolic process	100	[ABHD14B, ADRM1, AKIRIN2, APOPT1, ARIH1, ARL2BP, ATF4, BCL2L11, CAB39, CCL14, CCNY, CD44, CDH3, CHCHD2, CITED2, CNOT7, CREB3L2, CTNNB1, DCUN1D1, DCUN1D5, DDX5, DLX5, EFNA1, EIF3E, EIF4A3, EIF5A, ELF5, EZR, FKBP1A, FOXP1, GATA3, GTF2F1, GTF2F2, HABP4, HAND2, HMGB1, HNRNPK, HNRNPU, HSP90AA1, HSPB1, ILF2, INHBA, INSIG2, IRF6, JUN, KIT, LBH, LMO4, LPIN1, MEIS1, MLLT11, MTPN, NCOR1, NKX2-1, NR4A3, NSU…
positive regulation of macromolecule metabolic process	100	[ABHD14B, ADRM1, AKIRIN2, APOPT1, ARIH1, ARL2BP, ATF4, BCL2L11, CAB39, CCL14, CCNY, CD44, CDH3, CHCHD2, CITED2, CNOT7, CREB3L2, CTNNB1, DCUN1D1, DCUN1D5, DDX5, DLX5, EFNA1, EIF3E, EIF4A3, EIF5A, ELF5, EZR, FKBP1A, FOXP1, GATA3, GTF2F1, GTF2F2, HABP4, HAND2, HMGB1, HNRNPK, HNRNPU, HSP90AA1, HSPB1, ILF2, INHBA, INSIG2, IRF6, JUN, KIT, LBH, LMO4, LPIN1, MEIS1, MLLT11, MTPN, NCOR1, NKX2-1, NR4A3, NSU…
positive regulation of macromolecule metabolic process	100	[ABHD14B, ADRM1, AKIRIN2, APOPT1, ARIH1, ARL2BP, ATF4, BCL2L11, CAB39, CCL14, CCNY, CD44, CDH3, CHCHD2, CITED2, CNOT7, CREB3L2, CTNNB1, DCUN1D1, DCUN1D5, DDX5, DLX5, EFNA1, EIF3E, EIF4A3, EIF5A, ELF5, EZR, FKBP1A, FOXP1, GATA3, GTF2F1, GTF2F2, HABP4, HAND2, HMGB1, HNRNPK, HNRNPU, HSP90AA1, HSPB1, ILF2, INHBA, INSIG2, IRF6, JUN, KIT, LBH, LMO4, LPIN1, MEIS1, MLLT11, MTPN, NCOR1, NKX2-1, NR4A3, NSU…
positive regulation of nitrogen compound metabolic process	95	[ABHD14B, ADRM1, AKIRIN2, APOPT1, ARIH1, ARL2BP, ATF4, BCL2L11, CAB39, CCL14, CCNY, CD44, CHCHD2, CITED2, CNOT7, CREB3L2, CTNNB1, DCUN1D1, DCUN1D5, DDX5, DLX5, EFNA1, EIF3E, EIF4A3, EIF5A, ELF5, EZR, FKBP1A, FOXP1, GATA3, GTF2F1, GTF2F2, HABP4, HAND2, HMGB1, HNRNPK, HNRNPU, HSP90AA1, HSPB1, ILF2, INHBA, INSIG2, IRF6, JUN, KIT, LBH, LMO4, LPIN1, MEIS1, MLLT11, MTPN, NCOR1, NKX2-1, NR4A3, NSUN4, OA…
positive regulation of nitrogen compound metabolic process	95	[ABHD14B, ADRM1, AKIRIN2, APOPT1, ARIH1, ARL2BP, ATF4, BCL2L11, CAB39, CCL14, CCNY, CD44, CHCHD2, CITED2, CNOT7, CREB3L2, CTNNB1, DCUN1D1, DCUN1D5, DDX5, DLX5, EFNA1, EIF3E, EIF4A3, EIF5A, ELF5, EZR, FKBP1A, FOXP1, GATA3, GTF2F1, GTF2F2, HABP4, HAND2, HMGB1, HNRNPK, HNRNPU, HSP90AA1, HSPB1, ILF2, INHBA, INSIG2, IRF6, JUN, KIT, LBH, LMO4, LPIN1, MEIS1, MLLT11, MTPN, NCOR1, NKX2-1, NR4A3, NSUN4, OA…
regulation of protein metabolic process	90	[ADRM1, APOPT1, ARIH1, ARL2BP, BAG5, BCL2L11, CAB39, CCL14, CCNY, CD44, CNOT7, CTNNB1, DBIL5, DCUN1D1, DCUN1D5, DDX5, DEDD, DUSP14, EFNA1, EIF3E, EIF4A3, EIF4E, EIF4G2, EIF5, EIF5A, EZR, FKBP1A, FXR1, GAPDH, GATA3, GPS2, HABP4, HAND2, HMGB1, HNRNPK, HSP90AA1, HSPB1, INHBA, JUN, KIT, LSM14A, MGC137055, MTPN, NCOR1, NSUN4, OAZ1, OAZ3, PAFAH1B1, PAIP2, PAK1, PEBP1, PELI1, PKIG, POLR2D, PPP1R2, PRDX5…
regulation of protein metabolic process	90	[ADRM1, APOPT1, ARIH1, ARL2BP, BAG5, BCL2L11, CAB39, CCL14, CCNY, CD44, CNOT7, CTNNB1, DBIL5, DCUN1D1, DCUN1D5, DDX5, DEDD, DUSP14, EFNA1, EIF3E, EIF4A3, EIF4E, EIF4G2, EIF5, EIF5A, EZR, FKBP1A, FXR1, GAPDH, GATA3, GPS2, HABP4, HAND2, HMGB1, HNRNPK, HSP90AA1, HSPB1, INHBA, JUN, KIT, LSM14A, MGC137055, MTPN, NCOR1, NSUN4, OAZ1, OAZ3, PAFAH1B1, PAIP2, PAK1, PEBP1, PELI1, PKIG, POLR2D, PPP1R2, PRDX5…
regulation of protein metabolic process	90	[ADRM1, APOPT1, ARIH1, ARL2BP, BAG5, BCL2L11, CAB39, CCL14, CCNY, CD44, CNOT7, CTNNB1, DBIL5, DCUN1D1, DCUN1D5, DDX5, DEDD, DUSP14, EFNA1, EIF3E, EIF4A3, EIF4E, EIF4G2, EIF5, EIF5A, EZR, FKBP1A, FXR1, GAPDH, GATA3, GPS2, HABP4, HAND2, HMGB1, HNRNPK, HSP90AA1, HSPB1, INHBA, JUN, KIT, LSM14A, MGC137055, MTPN, NCOR1, NSUN4, OAZ1, OAZ3, PAFAH1B1, PAIP2, PAK1, PEBP1, PELI1, PKIG, POLR2D, PPP1R2, PRDX5…
cellular amide metabolic process	89	[ALDH5A1, ALLC, APH1A, CDKAL1, CNOT7, DDX5, DNPEP, EEF1A1, EEF1D, EEF1G, EEF2, EFNA1, EIF1, EIF3E, EIF3I, EIF4A3, EIF4E, EIF4G2, EIF5, EIF5A, FAU, FDXACB1, FXR1, GAPDH, GSTO2, HABP4, LSM14A, NCOR1, NSUN4, PAIP2, PGAM2, POLG2, POLR2D, RACK1, RPL10, RPL10A, RPL11, RPL12, RPL13, RPL13A, RPL14, RPL18, RPL19, RPL21, RPL22, RPL23, RPL24, RPL26, RPL28, RPL29, RPL3, RPL31, RPL35, RPL35A, RPL36, RPL36AL, …
cellular amide metabolic process	89	[ALDH5A1, ALLC, APH1A, CDKAL1, CNOT7, DDX5, DNPEP, EEF1A1, EEF1D, EEF1G, EEF2, EFNA1, EIF1, EIF3E, EIF3I, EIF4A3, EIF4E, EIF4G2, EIF5, EIF5A, FAU, FDXACB1, FXR1, GAPDH, GSTO2, HABP4, LSM14A, NCOR1, NSUN4, PAIP2, PGAM2, POLG2, POLR2D, RACK1, RPL10, RPL10A, RPL11, RPL12, RPL13, RPL13A, RPL14, RPL18, RPL19, RPL21, RPL22, RPL23, RPL24, RPL26, RPL28, RPL29, RPL3, RPL31, RPL35, RPL35A, RPL36, RPL36AL, …
intracellular ribonucleoprotein complex	88	[ACTB, CNOT7, CTNNBL1, DDX5, EIF4A3, EIF4E, FAU, FXR1, HABP4, HNRNPC, HNRNPH1, HNRNPK, HNRNPL, HNRNPU, ILF2, LSM14A, LSM2, MCRIP1, MRPL40, NOP10, NSUN4, PABPC1, PABPN1, PCBP1, POLR2D, RAC1, RACK1, RPL10, RPL10A, RPL11, RPL12, RPL13, RPL13A, RPL14, RPL18, RPL19, RPL21, RPL22, RPL23, RPL24, RPL26, RPL28, RPL29, RPL3, RPL31, RPL35, RPL35A, RPL36, RPL36AL, RPL37, RPL37A, RPL38, RPL5, RPL6, RPL7, RPL8…
intracellular ribonucleoprotein complex	88	[ACTB, CNOT7, CTNNBL1, DDX5, EIF4A3, EIF4E, FAU, FXR1, HABP4, HNRNPC, HNRNPH1, HNRNPK, HNRNPL, HNRNPU, ILF2, LSM14A, LSM2, MCRIP1, MRPL40, NOP10, NSUN4, PABPC1, PABPN1, PCBP1, POLR2D, RAC1, RACK1, RPL10, RPL10A, RPL11, RPL12, RPL13, RPL13A, RPL14, RPL18, RPL19, RPL21, RPL22, RPL23, RPL24, RPL26, RPL28, RPL29, RPL3, RPL31, RPL35, RPL35A, RPL36, RPL36AL, RPL37, RPL37A, RPL38, RPL5, RPL6, RPL7, RPL8…
intracellular ribonucleoprotein complex	88	[ACTB, CNOT7, CTNNBL1, DDX5, EIF4A3, EIF4E, FAU, FXR1, HABP4, HNRNPC, HNRNPH1, HNRNPK, HNRNPL, HNRNPU, ILF2, LSM14A, LSM2, MCRIP1, MRPL40, NOP10, NSUN4, PABPC1, PABPN1, PCBP1, POLR2D, RAC1, RACK1, RPL10, RPL10A, RPL11, RPL12, RPL13, RPL13A, RPL14, RPL18, RPL19, RPL21, RPL22, RPL23, RPL24, RPL26, RPL28, RPL29, RPL3, RPL31, RPL35, RPL35A, RPL36, RPL36AL, RPL37, RPL37A, RPL38, RPL5, RPL6, RPL7, RPL8…
peptide metabolic process	86	[ALDH5A1, APH1A, CDKAL1, CNOT7, DDX5, DNPEP, EEF1A1, EEF1D, EEF1G, EEF2, EFNA1, EIF1, EIF3E, EIF3I, EIF4A3, EIF4E, EIF4G2, EIF5, EIF5A, FAU, FDXACB1, FXR1, GAPDH, GSTO2, HABP4, LSM14A, NCOR1, NSUN4, PAIP2, POLG2, POLR2D, RACK1, RPL10, RPL10A, RPL11, RPL12, RPL13, RPL13A, RPL14, RPL18, RPL19, RPL21, RPL22, RPL23, RPL24, RPL26, RPL28, RPL29, RPL3, RPL31, RPL35, RPL35A, RPL36, RPL36AL, RPL37, RPL37A…
peptide metabolic process	86	[ALDH5A1, APH1A, CDKAL1, CNOT7, DDX5, DNPEP, EEF1A1, EEF1D, EEF1G, EEF2, EFNA1, EIF1, EIF3E, EIF3I, EIF4A3, EIF4E, EIF4G2, EIF5, EIF5A, FAU, FDXACB1, FXR1, GAPDH, GSTO2, HABP4, LSM14A, NCOR1, NSUN4, PAIP2, POLG2, POLR2D, RACK1, RPL10, RPL10A, RPL11, RPL12, RPL13, RPL13A, RPL14, RPL18, RPL19, RPL21, RPL22, RPL23, RPL24, RPL26, RPL28, RPL29, RPL3, RPL31, RPL35, RPL35A, RPL36, RPL36AL, RPL37, RPL37A…
regulation of cellular protein metabolic process	84	[ADRM1, APOPT1, ARIH1, ARL2BP, BAG5, BCL2L11, CAB39, CCL14, CCNY, CD44, CNOT7, CTNNB1, DBIL5, DCUN1D1, DCUN1D5, DDX5, DUSP14, EFNA1, EIF3E, EIF4A3, EIF4E, EIF4G2, EIF5, EIF5A, EZR, FKBP1A, FXR1, GAPDH, GATA3, GPS2, HABP4, HAND2, HMGB1, HSP90AA1, HSPB1, INHBA, JUN, KIT, LSM14A, MGC137055, NCOR1, NSUN4, PAFAH1B1, PAIP2, PAK1, PEBP1, PELI1, PKIG, POLR2D, PPP1R2, PRDX5, PSME1, PSMF1, RAC1, RACK1, RAP…
regulation of cellular protein metabolic process	84	[ADRM1, APOPT1, ARIH1, ARL2BP, BAG5, BCL2L11, CAB39, CCL14, CCNY, CD44, CNOT7, CTNNB1, DBIL5, DCUN1D1, DCUN1D5, DDX5, DUSP14, EFNA1, EIF3E, EIF4A3, EIF4E, EIF4G2, EIF5, EIF5A, EZR, FKBP1A, FXR1, GAPDH, GATA3, GPS2, HABP4, HAND2, HMGB1, HSP90AA1, HSPB1, INHBA, JUN, KIT, LSM14A, MGC137055, NCOR1, NSUN4, PAFAH1B1, PAIP2, PAK1, PEBP1, PELI1, PKIG, POLR2D, PPP1R2, PRDX5, PSME1, PSMF1, RAC1, RACK1, RAP…
regulation of cellular protein metabolic process	84	[ADRM1, APOPT1, ARIH1, ARL2BP, BAG5, BCL2L11, CAB39, CCL14, CCNY, CD44, CNOT7, CTNNB1, DBIL5, DCUN1D1, DCUN1D5, DDX5, DUSP14, EFNA1, EIF3E, EIF4A3, EIF4E, EIF4G2, EIF5, EIF5A, EZR, FKBP1A, FXR1, GAPDH, GATA3, GPS2, HABP4, HAND2, HMGB1, HSP90AA1, HSPB1, INHBA, JUN, KIT, LSM14A, MGC137055, NCOR1, NSUN4, PAFAH1B1, PAIP2, PAK1, PEBP1, PELI1, PKIG, POLR2D, PPP1R2, PRDX5, PSME1, PSMF1, RAC1, RACK1, RAP…
regulation of cellular protein metabolic process	84	[ADRM1, APOPT1, ARIH1, ARL2BP, BAG5, BCL2L11, CAB39, CCL14, CCNY, CD44, CNOT7, CTNNB1, DBIL5, DCUN1D1, DCUN1D5, DDX5, DUSP14, EFNA1, EIF3E, EIF4A3, EIF4E, EIF4G2, EIF5, EIF5A, EZR, FKBP1A, FXR1, GAPDH, GATA3, GPS2, HABP4, HAND2, HMGB1, HSP90AA1, HSPB1, INHBA, JUN, KIT, LSM14A, MGC137055, NCOR1, NSUN4, PAFAH1B1, PAIP2, PAK1, PEBP1, PELI1, PKIG, POLR2D, PPP1R2, PRDX5, PSME1, PSMF1, RAC1, RACK1, RAP…
macromolecular complex subunit organization	83	[ACTR3, ADRM1, ALDH5A1, ARF1, ARPC1A, ARPC2, ARPC4, ATL3, BCL2L11, CAPZA2, CAPZA3, CAPZB, CFL1, CLTA, CNOT7, COX3, COX7A2L, CTNNB1, EIF5A, FBP1, FKBP1A, FKBP4, GLS, GTF2F2, H3F3A, HILS1, HIST1H2BD, HMGB1, HSP90AA1, HSPA1A, JUN, KCNA4, KHDRBS3, KIF2C, LMO4, LSM14A, MAP1LC3A, MAT2A, MTPN, NDUFA5, NDUFB2, NSUN4, PAK1, PFN1, POLR2D, PTGES3, RAC1, RACK1, RDX, RPL10, RPL11, RPL12, RPL13A, RPL24, RPL3, …
macromolecular complex subunit organization	83	[ACTR3, ADRM1, ALDH5A1, ARF1, ARPC1A, ARPC2, ARPC4, ATL3, BCL2L11, CAPZA2, CAPZA3, CAPZB, CFL1, CLTA, CNOT7, COX3, COX7A2L, CTNNB1, EIF5A, FBP1, FKBP1A, FKBP4, GLS, GTF2F2, H3F3A, HILS1, HIST1H2BD, HMGB1, HSP90AA1, HSPA1A, JUN, KCNA4, KHDRBS3, KIF2C, LMO4, LSM14A, MAP1LC3A, MAT2A, MTPN, NDUFA5, NDUFB2, NSUN4, PAK1, PFN1, POLR2D, PTGES3, RAC1, RACK1, RDX, RPL10, RPL11, RPL12, RPL13A, RPL24, RPL3, …
enzyme binding	82	[ACAP2, ACTB, ACTG1, ADRM1, AKIRIN2, ANKRD2, ARIH1, ARPC4, ATF4, BAG5, BHLHE41, BICD2, BTG1, CAB39, CCNY, CDC34, CHD4, CTNNB1, CTNNBL1, CYB5A, DCUN1D1, DCUN1D5, DPYSL2, EIF4E, EZR, FBXO8, GABARAP, GPI, GSG1, HMGB1, HNRNPU, HSP90AA1, HSPA1L, HSPB1, JUN, KIT, LAMP1, LAMTOR4, LSM2, MAP1LC3A, MPHOSPH8, NCOR1, NKX2-1, NPC2, NR4A3, OSR1, PABPN1, PAFAH1B1, PAK1, PEBP1, PHACTR1, POLB, PPARGC1A, PPP1CB, P…
amide biosynthetic process	81	[CDKAL1, CNOT7, DDX5, EEF1A1, EEF1D, EEF1G, EEF2, EIF1, EIF3E, EIF3I, EIF4A3, EIF4E, EIF4G2, EIF5, EIF5A, FAU, FDXACB1, FXR1, GAPDH, HABP4, LSM14A, NCOR1, NSUN4, PAIP2, POLG2, POLR2D, RACK1, RPL10, RPL10A, RPL11, RPL12, RPL13, RPL13A, RPL14, RPL18, RPL19, RPL21, RPL22, RPL23, RPL24, RPL26, RPL28, RPL29, RPL3, RPL31, RPL35, RPL35A, RPL36, RPL36AL, RPL37, RPL37A, RPL38, RPL5, RPL6, RPL7, RPL8, RPLP…
amide biosynthetic process	81	[CDKAL1, CNOT7, DDX5, EEF1A1, EEF1D, EEF1G, EEF2, EIF1, EIF3E, EIF3I, EIF4A3, EIF4E, EIF4G2, EIF5, EIF5A, FAU, FDXACB1, FXR1, GAPDH, HABP4, LSM14A, NCOR1, NSUN4, PAIP2, POLG2, POLR2D, RACK1, RPL10, RPL10A, RPL11, RPL12, RPL13, RPL13A, RPL14, RPL18, RPL19, RPL21, RPL22, RPL23, RPL24, RPL26, RPL28, RPL29, RPL3, RPL31, RPL35, RPL35A, RPL36, RPL36AL, RPL37, RPL37A, RPL38, RPL5, RPL6, RPL7, RPL8, RPLP…
peptide biosynthetic process	80	[CDKAL1, CNOT7, DDX5, EEF1A1, EEF1D, EEF1G, EEF2, EIF1, EIF3E, EIF3I, EIF4A3, EIF4E, EIF4G2, EIF5, EIF5A, FAU, FDXACB1, FXR1, GAPDH, HABP4, LSM14A, NCOR1, NSUN4, PAIP2, POLG2, POLR2D, RACK1, RPL10, RPL10A, RPL11, RPL12, RPL13, RPL13A, RPL14, RPL18, RPL19, RPL21, RPL22, RPL23, RPL24, RPL26, RPL28, RPL29, RPL3, RPL31, RPL35, RPL35A, RPL36, RPL36AL, RPL37, RPL37A, RPL38, RPL5, RPL6, RPL7, RPL8, RPLP…
translation	80	[CDKAL1, CNOT7, DDX5, EEF1A1, EEF1D, EEF1G, EEF2, EIF1, EIF3E, EIF3I, EIF4A3, EIF4E, EIF4G2, EIF5, EIF5A, FAU, FDXACB1, FXR1, GAPDH, HABP4, LSM14A, NCOR1, NSUN4, PAIP2, POLG2, POLR2D, RACK1, RPL10, RPL10A, RPL11, RPL12, RPL13, RPL13A, RPL14, RPL18, RPL19, RPL21, RPL22, RPL23, RPL24, RPL26, RPL28, RPL29, RPL3, RPL31, RPL35, RPL35A, RPL36, RPL36AL, RPL37, RPL37A, RPL38, RPL5, RPL6, RPL7, RPL8, RPLP…
peptide biosynthetic process	80	[CDKAL1, CNOT7, DDX5, EEF1A1, EEF1D, EEF1G, EEF2, EIF1, EIF3E, EIF3I, EIF4A3, EIF4E, EIF4G2, EIF5, EIF5A, FAU, FDXACB1, FXR1, GAPDH, HABP4, LSM14A, NCOR1, NSUN4, PAIP2, POLG2, POLR2D, RACK1, RPL10, RPL10A, RPL11, RPL12, RPL13, RPL13A, RPL14, RPL18, RPL19, RPL21, RPL22, RPL23, RPL24, RPL26, RPL28, RPL29, RPL3, RPL31, RPL35, RPL35A, RPL36, RPL36AL, RPL37, RPL37A, RPL38, RPL5, RPL6, RPL7, RPL8, RPLP…
translation	80	[CDKAL1, CNOT7, DDX5, EEF1A1, EEF1D, EEF1G, EEF2, EIF1, EIF3E, EIF3I, EIF4A3, EIF4E, EIF4G2, EIF5, EIF5A, FAU, FDXACB1, FXR1, GAPDH, HABP4, LSM14A, NCOR1, NSUN4, PAIP2, POLG2, POLR2D, RACK1, RPL10, RPL10A, RPL11, RPL12, RPL13, RPL13A, RPL14, RPL18, RPL19, RPL21, RPL22, RPL23, RPL24, RPL26, RPL28, RPL29, RPL3, RPL31, RPL35, RPL35A, RPL36, RPL36AL, RPL37, RPL37A, RPL38, RPL5, RPL6, RPL7, RPL8, RPLP…
cytoskeleton	76	[ACTB, ACTG1, ACTL7B, ACTR3, AK1, ARL2BP, ARPC1A, ARPC2, ARPC4, ATF4, BCL2L11, BICD2, CAPZA2, CAPZA3, CAPZB, CCDC77, CEP41, CETN1, CFL1, CHD4, CLTA, CTNNB1, CYLC1, CYLC2, DCAF12, DPYSL2, DYNLL1, DYNLL2, EZR, FKBP4, GABARAP, GAPDH, GTF2F2, HNRNPK, HNRNPU, HSPA1A, HSPB1, KIF22, KIF2C, KIF5C, KRT24, LANCL2, LMNB2, LPXN, MAP1LC3A, MAP7, MLLT11, MTPN, MYL12A, NCOR1, ODF1, ODF2, PAFAH1B1, PCNT, PFN1, P…
cytoskeleton	76	[ACTB, ACTG1, ACTL7B, ACTR3, AK1, ARL2BP, ARPC1A, ARPC2, ARPC4, ATF4, BCL2L11, BICD2, CAPZA2, CAPZA3, CAPZB, CCDC77, CEP41, CETN1, CFL1, CHD4, CLTA, CTNNB1, CYLC1, CYLC2, DCAF12, DPYSL2, DYNLL1, DYNLL2, EZR, FKBP4, GABARAP, GAPDH, GTF2F2, HNRNPK, HNRNPU, HSPA1A, HSPB1, KIF22, KIF2C, KIF5C, KRT24, LANCL2, LMNB2, LPXN, MAP1LC3A, MAP7, MLLT11, MTPN, MYL12A, NCOR1, ODF1, ODF2, PAFAH1B1, PCNT, PFN1, P…
macromolecular complex assembly	76	[ACTR3, ADRM1, ALDH5A1, ARF1, ARPC1A, ARPC2, ARPC4, ATL3, BCL2L11, CAPZA2, CAPZA3, CAPZB, CLTA, CNOT7, COX3, COX7A2L, CTNNB1, FBP1, FKBP1A, FKBP4, GLS, GTF2F2, H3F3A, HILS1, HIST1H2BD, HMGB1, HSP90AA1, HSPA1A, JUN, KCNA4, KHDRBS3, LMO4, LSM14A, MAT2A, MTPN, NDUFA5, NDUFB2, NSUN4, PAK1, PFN1, POLR2D, PTGES3, RAC1, RACK1, RDX, RPL10, RPL11, RPL12, RPL13A, RPL24, RPL3, RPL38, RPL5, RPL6, RPS15, RPS1…
macromolecular complex assembly	76	[ACTR3, ADRM1, ALDH5A1, ARF1, ARPC1A, ARPC2, ARPC4, ATL3, BCL2L11, CAPZA2, CAPZA3, CAPZB, CLTA, CNOT7, COX3, COX7A2L, CTNNB1, FBP1, FKBP1A, FKBP4, GLS, GTF2F2, H3F3A, HILS1, HIST1H2BD, HMGB1, HSP90AA1, HSPA1A, JUN, KCNA4, KHDRBS3, LMO4, LSM14A, MAT2A, MTPN, NDUFA5, NDUFB2, NSUN4, PAK1, PFN1, POLR2D, PTGES3, RAC1, RACK1, RDX, RPL10, RPL11, RPL12, RPL13A, RPL24, RPL3, RPL38, RPL5, RPL6, RPS15, RPS1…
cytoskeleton	76	[ACTB, ACTG1, ACTL7B, ACTR3, AK1, ARL2BP, ARPC1A, ARPC2, ARPC4, ATF4, BCL2L11, BICD2, CAPZA2, CAPZA3, CAPZB, CCDC77, CEP41, CETN1, CFL1, CHD4, CLTA, CTNNB1, CYLC1, CYLC2, DCAF12, DPYSL2, DYNLL1, DYNLL2, EZR, FKBP4, GABARAP, GAPDH, GTF2F2, HNRNPK, HNRNPU, HSPA1A, HSPB1, KIF22, KIF2C, KIF5C, KRT24, LANCL2, LMNB2, LPXN, MAP1LC3A, MAP7, MLLT11, MTPN, MYL12A, NCOR1, ODF1, ODF2, PAFAH1B1, PCNT, PFN1, P…
regulation of cellular component organization	75	[ACTR3, APOPT1, ARF1, ARPC1A, ARPC2, ARPC4, ATL3, BAG5, BCL2L11, BICD2, CAPZA2, CAPZA3, CAPZB, CD44, CFL1, CHMP5, CSNK1G2, CTNNB1, DNAJA4, DNAJB8, DPYSL2, EFNA1, EIF5A, EZR, FBP1, FKBP1A, FKBP4, GAP43, GATA3, GTF2F2, H3F3A, HMGB1, HNRNPK, HNRNPU, HSPA1A, HSPA1L, INHBA, JUN, KIT, LGALS3, LMO4, MLLT11, MTPN, NPM2, PAFAH1B1, PAK1, PFN1, PHPT1, PPARGC1A, PRRX1, RAB11A, RAC1, RACK1, RAD21, RAP1B, RDX,…
regulation of cellular component organization	75	[ACTR3, APOPT1, ARF1, ARPC1A, ARPC2, ARPC4, ATL3, BAG5, BCL2L11, BICD2, CAPZA2, CAPZA3, CAPZB, CD44, CFL1, CHMP5, CSNK1G2, CTNNB1, DNAJA4, DNAJB8, DPYSL2, EFNA1, EIF5A, EZR, FBP1, FKBP1A, FKBP4, GAP43, GATA3, GTF2F2, H3F3A, HMGB1, HNRNPK, HNRNPU, HSPA1A, HSPA1L, INHBA, JUN, KIT, LGALS3, LMO4, MLLT11, MTPN, NPM2, PAFAH1B1, PAK1, PFN1, PHPT1, PPARGC1A, PRRX1, RAB11A, RAC1, RACK1, RAD21, RAP1B, RDX,…
regulation of cellular component organization	75	[ACTR3, APOPT1, ARF1, ARPC1A, ARPC2, ARPC4, ATL3, BAG5, BCL2L11, BICD2, CAPZA2, CAPZA3, CAPZB, CD44, CFL1, CHMP5, CSNK1G2, CTNNB1, DNAJA4, DNAJB8, DPYSL2, EFNA1, EIF5A, EZR, FBP1, FKBP1A, FKBP4, GAP43, GATA3, GTF2F2, H3F3A, HMGB1, HNRNPK, HNRNPU, HSPA1A, HSPA1L, INHBA, JUN, KIT, LGALS3, LMO4, MLLT11, MTPN, NPM2, PAFAH1B1, PAK1, PFN1, PHPT1, PPARGC1A, PRRX1, RAB11A, RAC1, RACK1, RAD21, RAP1B, RDX,…
DNA binding	69	[ACTB, ATF4, BAZ2B, BHLHE41, CHCHD2, CHD2, CHD4, CREB3L2, CSDE1, CTNNB1, DEDD, DLX5, ELF5, ELMSAN1, FOXP1, GATA3, GTF2F1, GTF2F2, H2AFJ, H3F3A, HAND2, HDGF, HILS1, HIST1H2BD, HMGB1, HMGB3, HMGB4, HMGN1, HNRNPK, HNRNPL, HNRNPU, ILF2, IRF6, JUN, KIF22, LMO4, LSM14A, MEIS1, MPG, NACA, NCOR1, NKX2-1, NR4A3, PCBP1, POLB, POLG2, POLR2D, PPARGC1A, PRDX5, PRM1, PRM2, PRRX1, RPL7, RPS3, RTF1, SIX6, SLC2A4…
DNA binding	69	[ACTB, ATF4, BAZ2B, BHLHE41, CHCHD2, CHD2, CHD4, CREB3L2, CSDE1, CTNNB1, DEDD, DLX5, ELF5, ELMSAN1, FOXP1, GATA3, GTF2F1, GTF2F2, H2AFJ, H3F3A, HAND2, HDGF, HILS1, HIST1H2BD, HMGB1, HMGB3, HMGB4, HMGN1, HNRNPK, HNRNPL, HNRNPU, ILF2, IRF6, JUN, KIF22, LMO4, LSM14A, MEIS1, MPG, NACA, NCOR1, NKX2-1, NR4A3, PCBP1, POLB, POLG2, POLR2D, PPARGC1A, PRDX5, PRM1, PRM2, PRRX1, RPL7, RPS3, RTF1, SIX6, SLC2A4…
organic substance catabolic process	69	[ADRM1, ALDH5A1, ALLC, ARIH1, ASPDH, BAG5, CD44, CDC34, CLPP, CNOT7, CSDE1, DDX5, DEDD, EFNA1, EIF3E, EIF4A3, ENO1, EZR, FBP1, FBXO8, GAPDH, GAPDHS, GET4, GLS, GPI, HMGB1, HNRNPU, LPIN1, LYPLA1, MGC137055, NCOR1, OAZ1, OAZ3, PABPC1, PAFAH1B1, PGAM2, PKM, PLCD4, POLR2D, PSME1, PSMF1, RACK1, RDX, RNASEH1, RNF11, RPL11, RPS7, SAT1, SEC61B, SKP1, SOD1, SORD, SPATA18, SUMO1, SYNCRIP, TPI1, UBA52, UBB,…
cellular response to stress	66	[ANKRD2, ATF4, BAG5, BCL2L11, CD44, CETN1, CHCHD2, CHD2, CREB3L2, CTNNB1, DDX5, DNAJB1, EZR, FKBP1A, GABARAP, GET4, GLUL, GPS2, HAND2, HAS2, HMGB1, HNRNPK, HSPA1A, HSPB1, INSIG2, JUN, KIF22, MAP1LC3A, MPG, NCOR1, NR4A3, OSR1, PAFAH1B1, PAK1, POLB, POLG2, POLR2D, PPARGC1A, PRDX5, PRRX1, RACK1, RAD21, ROMO1, RPL26, RPS3, RUVBL1, SEC61B, SERP1, SLF1, SLU7, SOD1, SPATA18, SSRP1, SUMO1, SWI5, TGFB2, T…
cytoskeletal part	65	[ACTG1, ACTR3, AK1, ARL2BP, ARPC1A, ARPC2, ARPC4, ATF4, BCL2L11, BICD2, CAPZA2, CAPZA3, CAPZB, CCDC77, CEP41, CETN1, CFL1, CHD4, CLTA, CTNNB1, CYLC1, CYLC2, DCAF12, DPYSL2, DYNLL1, DYNLL2, EZR, FKBP4, GABARAP, HNRNPK, HNRNPU, HSPA1A, HSPB1, KIF22, KIF2C, KIF5C, KRT24, LANCL2, LMNB2, LPXN, MAP1LC3A, MLLT11, MTPN, MYL12A, NCOR1, ODF1, ODF2, PAFAH1B1, PCNT, POLB, RAB11A, RAC1, RDX, RPS3, RPS7, SERP1…
cytoskeletal part	65	[ACTG1, ACTR3, AK1, ARL2BP, ARPC1A, ARPC2, ARPC4, ATF4, BCL2L11, BICD2, CAPZA2, CAPZA3, CAPZB, CCDC77, CEP41, CETN1, CFL1, CHD4, CLTA, CTNNB1, CYLC1, CYLC2, DCAF12, DPYSL2, DYNLL1, DYNLL2, EZR, FKBP4, GABARAP, HNRNPK, HNRNPU, HSPA1A, HSPB1, KIF22, KIF2C, KIF5C, KRT24, LANCL2, LMNB2, LPXN, MAP1LC3A, MLLT11, MTPN, MYL12A, NCOR1, ODF1, ODF2, PAFAH1B1, PCNT, POLB, RAB11A, RAC1, RDX, RPS3, RPS7, SERP1…
cytoskeletal part	65	[ACTG1, ACTR3, AK1, ARL2BP, ARPC1A, ARPC2, ARPC4, ATF4, BCL2L11, BICD2, CAPZA2, CAPZA3, CAPZB, CCDC77, CEP41, CETN1, CFL1, CHD4, CLTA, CTNNB1, CYLC1, CYLC2, DCAF12, DPYSL2, DYNLL1, DYNLL2, EZR, FKBP4, GABARAP, HNRNPK, HNRNPU, HSPA1A, HSPB1, KIF22, KIF2C, KIF5C, KRT24, LANCL2, LMNB2, LPXN, MAP1LC3A, MLLT11, MTPN, MYL12A, NCOR1, ODF1, ODF2, PAFAH1B1, PCNT, POLB, RAB11A, RAC1, RDX, RPS3, RPS7, SERP1…
cytoskeletal part	65	[ACTG1, ACTR3, AK1, ARL2BP, ARPC1A, ARPC2, ARPC4, ATF4, BCL2L11, BICD2, CAPZA2, CAPZA3, CAPZB, CCDC77, CEP41, CETN1, CFL1, CHD4, CLTA, CTNNB1, CYLC1, CYLC2, DCAF12, DPYSL2, DYNLL1, DYNLL2, EZR, FKBP4, GABARAP, HNRNPK, HNRNPU, HSPA1A, HSPB1, KIF22, KIF2C, KIF5C, KRT24, LANCL2, LMNB2, LPXN, MAP1LC3A, MLLT11, MTPN, MYL12A, NCOR1, ODF1, ODF2, PAFAH1B1, PCNT, POLB, RAB11A, RAC1, RDX, RPS3, RPS7, SERP1…
positive regulation of gene expression	64	[ABHD14B, AKIRIN2, ATF4, CDH3, CHCHD2, CITED2, CNOT7, CREB3L2, CTNNB1, DDX5, DLX5, EIF3E, EIF4A3, EIF5A, ELF5, EZR, FOXP1, GATA3, GTF2F1, GTF2F2, HABP4, HAND2, HMGB1, HNRNPK, HNRNPU, ILF2, INHBA, INSIG2, IRF6, JUN, KIT, LBH, LMO4, LPIN1, MEIS1, MLLT11, NCOR1, NKX2-1, NR4A3, NSUN4, OSR1, PABPC1, PCBP1, POLR2D, PPARGC1A, PRRX1, RAD21, RDX, RPL11, RPL26, RPS3, RPS7, RPS9, RTF1, SERP1, SIX6, SYNCRIP,…
positive regulation of gene expression	64	[ABHD14B, AKIRIN2, ATF4, CDH3, CHCHD2, CITED2, CNOT7, CREB3L2, CTNNB1, DDX5, DLX5, EIF3E, EIF4A3, EIF5A, ELF5, EZR, FOXP1, GATA3, GTF2F1, GTF2F2, HABP4, HAND2, HMGB1, HNRNPK, HNRNPU, ILF2, INHBA, INSIG2, IRF6, JUN, KIT, LBH, LMO4, LPIN1, MEIS1, MLLT11, NCOR1, NKX2-1, NR4A3, NSUN4, OSR1, PABPC1, PCBP1, POLR2D, PPARGC1A, PRRX1, RAD21, RDX, RPL11, RPL26, RPS3, RPS7, RPS9, RTF1, SERP1, SIX6, SYNCRIP,…
mitochondrion	63	[ACSBG2, AKAP1, ALDH5A1, APOPT1, ARL2BP, BAG5, BCL2L11, BRI3BP, CABS1, CHCHD2, CISD1, CLPP, CLYBL, COQ10B, COX1, COX3, COX4I1, COX7A2, COX7A2L, COX7B, CSDE1, CYB5A, CYB5R2, DCAF5, DPYSL2, DYNLL1, FDX1, FKBP4, FUNDC2, GLS, GLUL, LDHB, LGALS3, LPIN1, LYRM4, MRPL40, NDUFA5, NDUFB2, NSUN4, PDHA2, POLG2, PRDX5, PRELID2, PYURF, QDPR, RAB11A, RACK1, ROMO1, RPS3, SDHAF3, SDHB, SLC25A3, SLC25A39, SLC25A6,…
cell development	62	[ACTG1, ARPC2, BAG5, CAPZA3, CAPZB, CFL1, CITED2, CTNNB1, DLX5, DPYSL2, EFNA1, EIF4E, ELAVL4, EZR, FKBP1A, FKBP4, FOXP1, GAP43, GATA3, H3F3A, HAND2, HNRNPU, INHBA, IRF6, JUN, KIF5C, KIT, MEIS1, MEX3C, NKX2-1, NPM2, NR4A3, NRN1, OSR1, PAFAH1B1, PAK1, PHGDH, PRM2, PRRX1, RAB11A, RAC1, RAP1B, RDX, RHOA, RIMS2, ROPN1, RPL24, S100A10, SOD1, SPEM1, STMN1, TGFB2, TNFRSF21, TNP1, TNP2, TSSK6, UBA52, UBB,…
cell development	62	[ACTG1, ARPC2, BAG5, CAPZA3, CAPZB, CFL1, CITED2, CTNNB1, DLX5, DPYSL2, EFNA1, EIF4E, ELAVL4, EZR, FKBP1A, FKBP4, FOXP1, GAP43, GATA3, H3F3A, HAND2, HNRNPU, INHBA, IRF6, JUN, KIF5C, KIT, MEIS1, MEX3C, NKX2-1, NPM2, NR4A3, NRN1, OSR1, PAFAH1B1, PAK1, PHGDH, PRM2, PRRX1, RAB11A, RAC1, RAP1B, RDX, RHOA, RIMS2, ROPN1, RPL24, S100A10, SOD1, SPEM1, STMN1, TGFB2, TNFRSF21, TNP1, TNP2, TSSK6, UBA52, UBB,…
cellular catabolic process	62	[ADRM1, ALDH5A1, ALLC, ARIH1, ASPDH, BAG5, C23H6orf106, CD44, CDC34, CLPP, CNOT7, CSDE1, DDX5, EFNA1, EIF3E, EIF4A3, EZR, FBXO8, FUNDC2, GABARAP, GET4, GLS, GSTO2, HMGB1, HNRNPU, LPIN1, MAP1LC3A, MGC137055, PABPC1, PGAM2, POLR2D, PSME1, PSMF1, RACK1, RDX, RETREG1, RNASEH1, RNF11, RPL11, RPS7, RUVBL1, SAT1, SEC61B, SKP1, SOD1, SORD, SPATA18, SUMO1, SYNCRIP, TPI1, UBA52, UBB, UBE2B, UBE2J1, UBE2N, …
cell development	62	[ACTG1, ARPC2, BAG5, CAPZA3, CAPZB, CFL1, CITED2, CTNNB1, DLX5, DPYSL2, EFNA1, EIF4E, ELAVL4, EZR, FKBP1A, FKBP4, FOXP1, GAP43, GATA3, H3F3A, HAND2, HNRNPU, INHBA, IRF6, JUN, KIF5C, KIT, MEIS1, MEX3C, NKX2-1, NPM2, NR4A3, NRN1, OSR1, PAFAH1B1, PAK1, PHGDH, PRM2, PRRX1, RAB11A, RAC1, RAP1B, RDX, RHOA, RIMS2, ROPN1, RPL24, S100A10, SOD1, SPEM1, STMN1, TGFB2, TNFRSF21, TNP1, TNP2, TSSK6, UBA52, UBB,…
cell development	62	[ACTG1, ARPC2, BAG5, CAPZA3, CAPZB, CFL1, CITED2, CTNNB1, DLX5, DPYSL2, EFNA1, EIF4E, ELAVL4, EZR, FKBP1A, FKBP4, FOXP1, GAP43, GATA3, H3F3A, HAND2, HNRNPU, INHBA, IRF6, JUN, KIF5C, KIT, MEIS1, MEX3C, NKX2-1, NPM2, NR4A3, NRN1, OSR1, PAFAH1B1, PAK1, PHGDH, PRM2, PRRX1, RAB11A, RAC1, RAP1B, RDX, RHOA, RIMS2, ROPN1, RPL24, S100A10, SOD1, SPEM1, STMN1, TGFB2, TNFRSF21, TNP1, TNP2, TSSK6, UBA52, UBB,…
cellular macromolecular complex assembly	59	[ACTR3, ADRM1, ARF1, ARPC1A, ARPC2, ARPC4, CAPZA2, CAPZA3, CAPZB, CLTA, CNOT7, COX3, COX7A2L, FKBP1A, FKBP4, H3F3A, HILS1, HIST1H2BD, HMGB1, HSP90AA1, HSPA1A, LSM14A, MTPN, NDUFA5, NDUFB2, NSUN4, PAK1, PFN1, POLR2D, PTGES3, RAC1, RDX, RPL10, RPL11, RPL12, RPL13A, RPL24, RPL3, RPL38, RPL5, RPL6, RPS15, RPS17, RPS19, RPS23, RPS28, RPS3, RPS5, RPSA, RUVBL1, SDHAF3, SLU7, SRPK2, STMN1, SWI5, TAF10, T…
cellular macromolecular complex assembly	59	[ACTR3, ADRM1, ARF1, ARPC1A, ARPC2, ARPC4, CAPZA2, CAPZA3, CAPZB, CLTA, CNOT7, COX3, COX7A2L, FKBP1A, FKBP4, H3F3A, HILS1, HIST1H2BD, HMGB1, HSP90AA1, HSPA1A, LSM14A, MTPN, NDUFA5, NDUFB2, NSUN4, PAK1, PFN1, POLR2D, PTGES3, RAC1, RDX, RPL10, RPL11, RPL12, RPL13A, RPL24, RPL3, RPL38, RPL5, RPL6, RPS15, RPS17, RPS19, RPS23, RPS28, RPS3, RPS5, RPSA, RUVBL1, SDHAF3, SLU7, SRPK2, STMN1, SWI5, TAF10, T…
cell projection	58	[ACTR3, AHCYL2, AK1, ARF1, ARL2BP, ARPC1A, ARPC2, ARPC4, ATF4, CABS1, CABYR, CAMK2D, CAPZB, CD44, CEP41, CETN1, CFL1, CTNNB1, DPYSL2, EZR, FKBP4, FXR1, GABARAP, GAP43, GLUL, GPI, HMGB1, HNRNPK, HSP90AA1, HSPB1, KCNA4, KIF5C, MTPN, ODF1, ODF2, PAFAH1B1, PAK1, RAB11A, RAB15, RAC1, RACK1, RDX, REEP6, RHOA, ROPN1, RPS3, SOD1, SORD, SPA17, SPATA6, STARD10, STMN1, TCP11, TEKT1, TNFRSF21, UBA52, UBB, VI…
cell projection	58	[ACTR3, AHCYL2, AK1, ARF1, ARL2BP, ARPC1A, ARPC2, ARPC4, ATF4, CABS1, CABYR, CAMK2D, CAPZB, CD44, CEP41, CETN1, CFL1, CTNNB1, DPYSL2, EZR, FKBP4, FXR1, GABARAP, GAP43, GLUL, GPI, HMGB1, HNRNPK, HSP90AA1, HSPB1, KCNA4, KIF5C, MTPN, ODF1, ODF2, PAFAH1B1, PAK1, RAB11A, RAB15, RAC1, RACK1, RDX, REEP6, RHOA, ROPN1, RPS3, SOD1, SORD, SPA17, SPATA6, STARD10, STMN1, TCP11, TEKT1, TNFRSF21, UBA52, UBB, VI…
cell projection	58	[ACTR3, AHCYL2, AK1, ARF1, ARL2BP, ARPC1A, ARPC2, ARPC4, ATF4, CABS1, CABYR, CAMK2D, CAPZB, CD44, CEP41, CETN1, CFL1, CTNNB1, DPYSL2, EZR, FKBP4, FXR1, GABARAP, GAP43, GLUL, GPI, HMGB1, HNRNPK, HSP90AA1, HSPB1, KCNA4, KIF5C, MTPN, ODF1, ODF2, PAFAH1B1, PAK1, RAB11A, RAB15, RAC1, RACK1, RDX, REEP6, RHOA, ROPN1, RPS3, SOD1, SORD, SPA17, SPATA6, STARD10, STMN1, TCP11, TEKT1, TNFRSF21, UBA52, UBB, VI…
positive regulation of macromolecule biosynthetic process	57	[ABHD14B, AKIRIN2, ATF4, CHCHD2, CITED2, CNOT7, CREB3L2, CTNNB1, DDX5, DLX5, EIF3E, EIF4A3, EIF5A, ELF5, FOXP1, GATA3, GTF2F1, GTF2F2, HABP4, HAND2, HMGB1, HNRNPK, HNRNPU, HSP90AA1, HSPB1, ILF2, INHBA, INSIG2, IRF6, JUN, LBH, LMO4, LPIN1, MEIS1, MLLT11, MTPN, NCOR1, NKX2-1, NR4A3, NSUN4, OSR1, PCBP1, POLR2D, PPARGC1A, PRRX1, PTGES3, RAD21, RPL26, RPS9, RTF1, SERP1, SIX6, SOD1, TFAM, TGFB2, WNT5A,…
positive regulation of protein metabolic process	57	[ADRM1, APOPT1, ARIH1, ARL2BP, BCL2L11, CAB39, CCL14, CCNY, CD44, CTNNB1, DCUN1D1, DCUN1D5, EFNA1, EIF3E, EIF4A3, EIF5A, EZR, FKBP1A, GATA3, HABP4, HAND2, HMGB1, HNRNPK, HSPB1, INHBA, JUN, KIT, MTPN, NCOR1, NSUN4, OAZ1, OAZ3, PAK1, PELI1, POLR2D, PSME1, RAC1, RACK1, RAP1B, RDX, RHOA, RPL26, RPLP1, RPS3, RPS9, RTF1, SERP1, SOD1, SUMO1, TGFB2, TNP1, TNP2, UBA52, UBB, UBE2N, VRK3, WNT5A]
positive regulation of macromolecule biosynthetic process	57	[ABHD14B, AKIRIN2, ATF4, CHCHD2, CITED2, CNOT7, CREB3L2, CTNNB1, DDX5, DLX5, EIF3E, EIF4A3, EIF5A, ELF5, FOXP1, GATA3, GTF2F1, GTF2F2, HABP4, HAND2, HMGB1, HNRNPK, HNRNPU, HSP90AA1, HSPB1, ILF2, INHBA, INSIG2, IRF6, JUN, LBH, LMO4, LPIN1, MEIS1, MLLT11, MTPN, NCOR1, NKX2-1, NR4A3, NSUN4, OSR1, PCBP1, POLR2D, PPARGC1A, PRRX1, PTGES3, RAD21, RPL26, RPS9, RTF1, SERP1, SIX6, SOD1, TFAM, TGFB2, WNT5A,…
positive regulation of protein metabolic process	57	[ADRM1, APOPT1, ARIH1, ARL2BP, BCL2L11, CAB39, CCL14, CCNY, CD44, CTNNB1, DCUN1D1, DCUN1D5, EFNA1, EIF3E, EIF4A3, EIF5A, EZR, FKBP1A, GATA3, HABP4, HAND2, HMGB1, HNRNPK, HSPB1, INHBA, JUN, KIT, MTPN, NCOR1, NSUN4, OAZ1, OAZ3, PAK1, PELI1, POLR2D, PSME1, RAC1, RACK1, RAP1B, RDX, RHOA, RPL26, RPLP1, RPS3, RPS9, RTF1, SERP1, SOD1, SUMO1, TGFB2, TNP1, TNP2, UBA52, UBB, UBE2N, VRK3, WNT5A]
positive regulation of protein metabolic process	57	[ADRM1, APOPT1, ARIH1, ARL2BP, BCL2L11, CAB39, CCL14, CCNY, CD44, CTNNB1, DCUN1D1, DCUN1D5, EFNA1, EIF3E, EIF4A3, EIF5A, EZR, FKBP1A, GATA3, HABP4, HAND2, HMGB1, HNRNPK, HSPB1, INHBA, JUN, KIT, MTPN, NCOR1, NSUN4, OAZ1, OAZ3, PAK1, PELI1, POLR2D, PSME1, RAC1, RACK1, RAP1B, RDX, RHOA, RPL26, RPLP1, RPS3, RPS9, RTF1, SERP1, SOD1, SUMO1, TGFB2, TNP1, TNP2, UBA52, UBB, UBE2N, VRK3, WNT5A]
ribosome	56	[FAU, MRPL40, NSUN4, RACK1, RPL10, RPL10A, RPL11, RPL12, RPL13, RPL13A, RPL14, RPL18, RPL19, RPL21, RPL22, RPL23, RPL24, RPL26, RPL28, RPL29, RPL3, RPL31, RPL35, RPL35A, RPL36, RPL36AL, RPL37, RPL37A, RPL38, RPL5, RPL6, RPL7, RPL8, RPLP0, RPLP1, RPS11, RPS14, RPS15, RPS15A, RPS16, RPS17, RPS18, RPS19, RPS2, RPS20, RPS23, RPS26, RPS28, RPS3, RPS5, RPS6, RPS7, RPS8, RPS9, RPSA, UBA52]
plasma membrane bounded cell projection	56	[ACTR3, AHCYL2, AK1, ARF1, ARL2BP, ARPC1A, ARPC2, ATF4, CABS1, CABYR, CAMK2D, CAPZB, CD44, CEP41, CETN1, CFL1, CTNNB1, DPYSL2, EZR, FKBP4, FXR1, GABARAP, GAP43, GLUL, GPI, HMGB1, HSP90AA1, HSPB1, KCNA4, KIF5C, MTPN, ODF1, ODF2, PAFAH1B1, PAK1, RAB11A, RAB15, RAC1, RACK1, RDX, REEP6, RHOA, ROPN1, RPS3, SOD1, SORD, SPA17, SPATA6, STARD10, STMN1, TCP11, TEKT1, TNFRSF21, UBA52, UBB, VIM]
ribosome	56	[FAU, MRPL40, NSUN4, RACK1, RPL10, RPL10A, RPL11, RPL12, RPL13, RPL13A, RPL14, RPL18, RPL19, RPL21, RPL22, RPL23, RPL24, RPL26, RPL28, RPL29, RPL3, RPL31, RPL35, RPL35A, RPL36, RPL36AL, RPL37, RPL37A, RPL38, RPL5, RPL6, RPL7, RPL8, RPLP0, RPLP1, RPS11, RPS14, RPS15, RPS15A, RPS16, RPS17, RPS18, RPS19, RPS2, RPS20, RPS23, RPS26, RPS28, RPS3, RPS5, RPS6, RPS7, RPS8, RPS9, RPSA, UBA52]
plasma membrane bounded cell projection	56	[ACTR3, AHCYL2, AK1, ARF1, ARL2BP, ARPC1A, ARPC2, ATF4, CABS1, CABYR, CAMK2D, CAPZB, CD44, CEP41, CETN1, CFL1, CTNNB1, DPYSL2, EZR, FKBP4, FXR1, GABARAP, GAP43, GLUL, GPI, HMGB1, HSP90AA1, HSPB1, KCNA4, KIF5C, MTPN, ODF1, ODF2, PAFAH1B1, PAK1, RAB11A, RAB15, RAC1, RACK1, RDX, REEP6, RHOA, ROPN1, RPS3, SOD1, SORD, SPA17, SPATA6, STARD10, STMN1, TCP11, TEKT1, TNFRSF21, UBA52, UBB, VIM]
plasma membrane bounded cell projection	56	[ACTR3, AHCYL2, AK1, ARF1, ARL2BP, ARPC1A, ARPC2, ATF4, CABS1, CABYR, CAMK2D, CAPZB, CD44, CEP41, CETN1, CFL1, CTNNB1, DPYSL2, EZR, FKBP4, FXR1, GABARAP, GAP43, GLUL, GPI, HMGB1, HSP90AA1, HSPB1, KCNA4, KIF5C, MTPN, ODF1, ODF2, PAFAH1B1, PAK1, RAB11A, RAB15, RAC1, RACK1, RDX, REEP6, RHOA, ROPN1, RPS3, SOD1, SORD, SPA17, SPATA6, STARD10, STMN1, TCP11, TEKT1, TNFRSF21, UBA52, UBB, VIM]
programmed cell death	55	[ANKRD2, APOPT1, ATF4, BAG5, BCL2L11, BTG1, CD44, CITED2, CTNNB1, CTNNBL1, DDX5, DEDD, DKKL1, DYNLL1, EFNA1, EIF5A, GABARAP, GAPDH, GATA3, GSDME, HAND2, HMGB1, HNRNPK, HSPB1, INHBA, JUN, KIT, LAMP1, LGALS3, MLLT11, NR4A3, OSR1, PABPN1, PAK1, POLB, PPARGC1A, PRDX5, RACK1, RAD21, RETREG1, RPL11, RPL26, RPS3, RPS7, S100A14, SLC25A6, SOD1, TAF10, TGFB2, TNFRSF21, UBA52, UBB, UBE2B, WNT5A, YBX3]
programmed cell death	55	[ANKRD2, APOPT1, ATF4, BAG5, BCL2L11, BTG1, CD44, CITED2, CTNNB1, CTNNBL1, DDX5, DEDD, DKKL1, DYNLL1, EFNA1, EIF5A, GABARAP, GAPDH, GATA3, GSDME, HAND2, HMGB1, HNRNPK, HSPB1, INHBA, JUN, KIT, LAMP1, LGALS3, MLLT11, NR4A3, OSR1, PABPN1, PAK1, POLB, PPARGC1A, PRDX5, RACK1, RAD21, RETREG1, RPL11, RPL26, RPS3, RPS7, S100A14, SLC25A6, SOD1, TAF10, TGFB2, TNFRSF21, UBA52, UBB, UBE2B, WNT5A, YBX3]
apoptotic process	54	[ANKRD2, APOPT1, ATF4, BAG5, BCL2L11, BTG1, CD44, CITED2, CTNNB1, CTNNBL1, DDX5, DEDD, DKKL1, DYNLL1, EFNA1, EIF5A, GABARAP, GAPDH, GATA3, GSDME, HAND2, HMGB1, HNRNPK, HSPB1, INHBA, JUN, LAMP1, LGALS3, MLLT11, NR4A3, OSR1, PABPN1, PAK1, POLB, PPARGC1A, PRDX5, RACK1, RAD21, RETREG1, RPL11, RPL26, RPS3, RPS7, S100A14, SLC25A6, SOD1, TAF10, TGFB2, TNFRSF21, UBA52, UBB, UBE2B, WNT5A, YBX3]
cytoskeleton organization	54	[ACTB, ACTG1, ACTR3, ARF1, ARPC1A, ARPC2, ARPC4, BICD2, CAPZA2, CAPZA3, CAPZB, CFL1, CHMP5, CTNNB1, CYLC1, CYLC2, DPYSL2, EZR, FKBP4, FOXP1, GABARAP, GAPDH, HNRNPU, HSPA1A, KIF2C, KIT, LIMCH1, MAP7, MTPN, MYL12A, NCOR1, ODF2, PAFAH1B1, PAK1, PCNT, PFN1, PHACTR1, PHPT1, RAB11A, RAC1, RDX, RHOA, RPS3, S100A10, SOD1, SPAG4, STMN1, TMSB10, TMSB4X, TPM3, TRIM36, TUBB4B, UBE2B, VIM]
negative regulation of gene expression	54	[ANKRD2, BHLHE41, CNOT7, CSDE1, CTNNB1, DDX5, DEDD, DNAJB1, EFNA1, EIF3E, EIF4A3, EIF4E, EZR, FBP1, FOXP1, FXR1, GATA3, GPS2, H2AFJ, HAND2, HDGF, HMGB1, HNRNPK, HNRNPU, HSPA1A, JUN, LANCL2, MORF4L1, MPHOSPH8, NCOR1, NKX2-1, NR4A3, OSR1, PABPC1, PAIP2, PKIG, POLR2D, PRDX5, PRRX1, RACK1, RPL13A, RPS3, RTF1, SRSF9, SUMO1, SYNCRIP, THAP1, TNP1, TRA2B, UBE2B, WNT5A, YBX1, YBX3, YWHAQ]
cytoskeleton organization	54	[ACTB, ACTG1, ACTR3, ARF1, ARPC1A, ARPC2, ARPC4, BICD2, CAPZA2, CAPZA3, CAPZB, CFL1, CHMP5, CTNNB1, CYLC1, CYLC2, DPYSL2, EZR, FKBP4, FOXP1, GABARAP, GAPDH, HNRNPU, HSPA1A, KIF2C, KIT, LIMCH1, MAP7, MTPN, MYL12A, NCOR1, ODF2, PAFAH1B1, PAK1, PCNT, PFN1, PHACTR1, PHPT1, RAB11A, RAC1, RDX, RHOA, RPS3, S100A10, SOD1, SPAG4, STMN1, TMSB10, TMSB4X, TPM3, TRIM36, TUBB4B, UBE2B, VIM]
apoptotic process	54	[ANKRD2, APOPT1, ATF4, BAG5, BCL2L11, BTG1, CD44, CITED2, CTNNB1, CTNNBL1, DDX5, DEDD, DKKL1, DYNLL1, EFNA1, EIF5A, GABARAP, GAPDH, GATA3, GSDME, HAND2, HMGB1, HNRNPK, HSPB1, INHBA, JUN, LAMP1, LGALS3, MLLT11, NR4A3, OSR1, PABPN1, PAK1, POLB, PPARGC1A, PRDX5, RACK1, RAD21, RETREG1, RPL11, RPL26, RPS3, RPS7, S100A14, SLC25A6, SOD1, TAF10, TGFB2, TNFRSF21, UBA52, UBB, UBE2B, WNT5A, YBX3]
cytoskeleton organization	54	[ACTB, ACTG1, ACTR3, ARF1, ARPC1A, ARPC2, ARPC4, BICD2, CAPZA2, CAPZA3, CAPZB, CFL1, CHMP5, CTNNB1, CYLC1, CYLC2, DPYSL2, EZR, FKBP4, FOXP1, GABARAP, GAPDH, HNRNPU, HSPA1A, KIF2C, KIT, LIMCH1, MAP7, MTPN, MYL12A, NCOR1, ODF2, PAFAH1B1, PAK1, PCNT, PFN1, PHACTR1, PHPT1, RAB11A, RAC1, RDX, RHOA, RPS3, S100A10, SOD1, SPAG4, STMN1, TMSB10, TMSB4X, TPM3, TRIM36, TUBB4B, UBE2B, VIM]
Ribosome	53	[FAU, RPL10, RPL10A, RPL11, RPL12, RPL13, RPL13A, RPL14, RPL18, RPL19, RPL21, RPL22, RPL23, RPL24, RPL26, RPL28, RPL29, RPL3, RPL31, RPL35, RPL35A, RPL36, RPL36AL, RPL37, RPL37A, RPL38, RPL5, RPL6, RPL7, RPL8, RPLP0, RPLP1, RPS11, RPS14, RPS15, RPS15A, RPS16, RPS17, RPS18, RPS19, RPS2, RPS20, RPS23, RPS26, RPS28, RPS3, RPS5, RPS6, RPS7, RPS8, RPS9, RPSA, UBA52]
Ribosome	53	[FAU, RPL10, RPL10A, RPL11, RPL12, RPL13, RPL13A, RPL14, RPL18, RPL19, RPL21, RPL22, RPL23, RPL24, RPL26, RPL28, RPL29, RPL3, RPL31, RPL35, RPL35A, RPL36, RPL36AL, RPL37, RPL37A, RPL38, RPL5, RPL6, RPL7, RPL8, RPLP0, RPLP1, RPS11, RPS14, RPS15, RPS15A, RPS16, RPS17, RPS18, RPS19, RPS2, RPS20, RPS23, RPS26, RPS28, RPS3, RPS5, RPS6, RPS7, RPS8, RPS9, RPSA, UBA52]
positive regulation of cellular protein metabolic process	52	[ADRM1, APOPT1, ARIH1, ARL2BP, BCL2L11, CAB39, CCL14, CCNY, CD44, CTNNB1, DCUN1D1, DCUN1D5, EFNA1, EIF3E, EIF4A3, EIF5A, EZR, FKBP1A, GATA3, HABP4, HAND2, HMGB1, INHBA, JUN, KIT, NCOR1, NSUN4, PAK1, PELI1, POLR2D, PSME1, RAC1, RACK1, RAP1B, RDX, RHOA, RPL26, RPLP1, RPS3, RPS9, RTF1, SERP1, SOD1, SUMO1, TGFB2, TNP1, TNP2, UBA52, UBB, UBE2N, VRK3, WNT5A]
ribosomal subunit	52	[FAU, MRPL40, NSUN4, RPL10, RPL10A, RPL11, RPL12, RPL13, RPL13A, RPL14, RPL18, RPL19, RPL22, RPL23, RPL24, RPL26, RPL28, RPL29, RPL3, RPL31, RPL35, RPL35A, RPL36, RPL37, RPL37A, RPL38, RPL5, RPL6, RPL7, RPL8, RPLP0, RPLP1, RPS11, RPS15, RPS15A, RPS16, RPS17, RPS18, RPS19, RPS2, RPS20, RPS23, RPS26, RPS28, RPS3, RPS5, RPS6, RPS7, RPS8, RPS9, RPSA, UBA52]
cytosolic part	52	[ENO1, FAU, GET4, RPL10, RPL10A, RPL11, RPL12, RPL13, RPL13A, RPL14, RPL18, RPL19, RPL22, RPL23, RPL24, RPL26, RPL28, RPL29, RPL3, RPL31, RPL35, RPL35A, RPL36, RPL37, RPL37A, RPL38, RPL5, RPL6, RPL7, RPL8, RPLP0, RPLP1, RPS11, RPS15, RPS15A, RPS16, RPS17, RPS18, RPS19, RPS2, RPS20, RPS23, RPS26, RPS28, RPS3, RPS5, RPS6, RPS7, RPS8, RPS9, RPSA, UBA52]
positive regulation of cellular protein metabolic process	52	[ADRM1, APOPT1, ARIH1, ARL2BP, BCL2L11, CAB39, CCL14, CCNY, CD44, CTNNB1, DCUN1D1, DCUN1D5, EFNA1, EIF3E, EIF4A3, EIF5A, EZR, FKBP1A, GATA3, HABP4, HAND2, HMGB1, INHBA, JUN, KIT, NCOR1, NSUN4, PAK1, PELI1, POLR2D, PSME1, RAC1, RACK1, RAP1B, RDX, RHOA, RPL26, RPLP1, RPS3, RPS9, RTF1, SERP1, SOD1, SUMO1, TGFB2, TNP1, TNP2, UBA52, UBB, UBE2N, VRK3, WNT5A]
positive regulation of cellular protein metabolic process	52	[ADRM1, APOPT1, ARIH1, ARL2BP, BCL2L11, CAB39, CCL14, CCNY, CD44, CTNNB1, DCUN1D1, DCUN1D5, EFNA1, EIF3E, EIF4A3, EIF5A, EZR, FKBP1A, GATA3, HABP4, HAND2, HMGB1, INHBA, JUN, KIT, NCOR1, NSUN4, PAK1, PELI1, POLR2D, PSME1, RAC1, RACK1, RAP1B, RDX, RHOA, RPL26, RPLP1, RPS3, RPS9, RTF1, SERP1, SOD1, SUMO1, TGFB2, TNP1, TNP2, UBA52, UBB, UBE2N, VRK3, WNT5A]
ribosomal subunit	52	[FAU, MRPL40, NSUN4, RPL10, RPL10A, RPL11, RPL12, RPL13, RPL13A, RPL14, RPL18, RPL19, RPL22, RPL23, RPL24, RPL26, RPL28, RPL29, RPL3, RPL31, RPL35, RPL35A, RPL36, RPL37, RPL37A, RPL38, RPL5, RPL6, RPL7, RPL8, RPLP0, RPLP1, RPS11, RPS15, RPS15A, RPS16, RPS17, RPS18, RPS19, RPS2, RPS20, RPS23, RPS26, RPS28, RPS3, RPS5, RPS6, RPS7, RPS8, RPS9, RPSA, UBA52]
cytosolic part	52	[ENO1, FAU, GET4, RPL10, RPL10A, RPL11, RPL12, RPL13, RPL13A, RPL14, RPL18, RPL19, RPL22, RPL23, RPL24, RPL26, RPL28, RPL29, RPL3, RPL31, RPL35, RPL35A, RPL36, RPL37, RPL37A, RPL38, RPL5, RPL6, RPL7, RPL8, RPLP0, RPLP1, RPS11, RPS15, RPS15A, RPS16, RPS17, RPS18, RPS19, RPS2, RPS20, RPS23, RPS26, RPS28, RPS3, RPS5, RPS6, RPS7, RPS8, RPS9, RPSA, UBA52]
positive regulation of cellular protein metabolic process	52	[ADRM1, APOPT1, ARIH1, ARL2BP, BCL2L11, CAB39, CCL14, CCNY, CD44, CTNNB1, DCUN1D1, DCUN1D5, EFNA1, EIF3E, EIF4A3, EIF5A, EZR, FKBP1A, GATA3, HABP4, HAND2, HMGB1, INHBA, JUN, KIT, NCOR1, NSUN4, PAK1, PELI1, POLR2D, PSME1, RAC1, RACK1, RAP1B, RDX, RHOA, RPL26, RPLP1, RPS3, RPS9, RTF1, SERP1, SOD1, SUMO1, TGFB2, TNP1, TNP2, UBA52, UBB, UBE2N, VRK3, WNT5A]
protein complex subunit organization	52	[ACTR3, ADRM1, ALDH5A1, ARF1, ARPC1A, ARPC2, ARPC4, ATL3, BCL2L11, CAPZA2, CAPZA3, CAPZB, CFL1, CLTA, COX3, COX7A2L, CTNNB1, EIF5A, FBP1, FKBP1A, FKBP4, GLS, GTF2F2, HMGB1, HSP90AA1, HSPA1A, JUN, KCNA4, KHDRBS3, KIF2C, LMO4, MAP1LC3A, MAT2A, MTPN, NDUFA5, NDUFB2, PAK1, PFN1, RAC1, RACK1, RDX, RPS3, S100A10, SDHAF3, SLF1, STMN1, SUMO1, TAF10, TFAM, TGFB2, TRA2B, VPS41]
macromolecule catabolic process	51	[ADRM1, ARIH1, BAG5, CD44, CDC34, CLPP, CNOT7, CSDE1, DDX5, DEDD, EFNA1, EIF3E, EIF4A3, EZR, FBXO8, GET4, HMGB1, HNRNPU, LYPLA1, MGC137055, OAZ1, OAZ3, PABPC1, POLR2D, PSME1, PSMF1, RACK1, RDX, RNASEH1, RNF11, RPL11, RPS7, SEC61B, SKP1, SOD1, SPATA18, SUMO1, SYNCRIP, UBA52, UBB, UBE2B, UBE2J1, UBE2N, UBE2R2, UBXN11, UBXN4, UBXN6, WNT5A, YBX1, ZNRF1, ZNRF4]
cytosolic ribosome	50	[FAU, RPL10, RPL10A, RPL11, RPL12, RPL13, RPL13A, RPL14, RPL18, RPL19, RPL22, RPL23, RPL24, RPL26, RPL28, RPL29, RPL3, RPL31, RPL35, RPL35A, RPL36, RPL37, RPL37A, RPL38, RPL5, RPL6, RPL7, RPL8, RPLP0, RPLP1, RPS11, RPS15, RPS15A, RPS16, RPS17, RPS18, RPS19, RPS2, RPS20, RPS23, RPS26, RPS28, RPS3, RPS5, RPS6, RPS7, RPS8, RPS9, RPSA, UBA52]
negative regulation of biosynthetic process	50	[ANKRD2, BHLHE41, CITED2, CNOT7, CTNNB1, DDX5, DEDD, DKKL1, DNAJB1, EFNA1, EIF4A3, EIF4E, EZR, FBP1, FOXP1, FXR1, GATA3, GPS2, H2AFJ, HDGF, HMGB1, HNRNPU, HSPA1A, INSIG2, JUN, LANCL2, MORF4L1, MPHOSPH8, NCOR1, NKX2-1, NR4A3, OSR1, PAIP2, PGP, PKIG, PRDX5, PRRX1, RPL13A, RPS3, RTF1, SOD1, SUMO1, SYNCRIP, THAP1, TNP1, UBE2B, WNT5A, YBX1, YBX3, YWHAQ]
cytosolic ribosome	50	[FAU, RPL10, RPL10A, RPL11, RPL12, RPL13, RPL13A, RPL14, RPL18, RPL19, RPL22, RPL23, RPL24, RPL26, RPL28, RPL29, RPL3, RPL31, RPL35, RPL35A, RPL36, RPL37, RPL37A, RPL38, RPL5, RPL6, RPL7, RPL8, RPLP0, RPLP1, RPS11, RPS15, RPS15A, RPS16, RPS17, RPS18, RPS19, RPS2, RPS20, RPS23, RPS26, RPS28, RPS3, RPS5, RPS6, RPS7, RPS8, RPS9, RPSA, UBA52]
negative regulation of cellular biosynthetic process	49	[ANKRD2, BHLHE41, CITED2, CNOT7, CTNNB1, DDX5, DEDD, DKKL1, DNAJB1, EFNA1, EIF4A3, EIF4E, EZR, FBP1, FOXP1, FXR1, GATA3, GPS2, H2AFJ, HDGF, HMGB1, HNRNPU, HSPA1A, INSIG2, JUN, LANCL2, MORF4L1, MPHOSPH8, NCOR1, NKX2-1, NR4A3, OSR1, PAIP2, PGP, PKIG, PRDX5, PRRX1, RPL13A, RPS3, RTF1, SUMO1, SYNCRIP, THAP1, TNP1, UBE2B, WNT5A, YBX1, YBX3, YWHAQ]
cell projection organization	47	[ACTR3, ARF1, ARPC2, BAG5, CAPZB, CD44, CEP41, CFL1, CTNNB1, DLX5, DPYSL2, DYNLL1, DYNLL2, EFNA1, ELAVL4, EZR, FKBP1A, FKBP4, FOXP1, GAP43, GATA3, JUN, KIF5C, KIT, NKX2-1, NR4A3, NRN1, PAFAH1B1, PAK1, PCNT, PHGDH, PRRX1, RAB11A, RAC1, RDX, RIMS2, ROPN1, RPL24, SOD1, SPATA6, STMN1, TEKT1, UBA52, UBB, UBE2B, VIM, WNT5A]
plasma membrane bounded cell projection organization	47	[ACTR3, ARF1, ARPC2, BAG5, CAPZB, CD44, CEP41, CFL1, CTNNB1, DLX5, DPYSL2, DYNLL1, DYNLL2, EFNA1, ELAVL4, EZR, FKBP1A, FKBP4, FOXP1, GAP43, GATA3, JUN, KIF5C, KIT, NKX2-1, NR4A3, NRN1, PAFAH1B1, PAK1, PCNT, PHGDH, PRRX1, RAB11A, RAC1, RDX, RIMS2, ROPN1, RPL24, SOD1, SPATA6, STMN1, TEKT1, UBA52, UBB, UBE2B, VIM, WNT5A]
cell projection organization	47	[ACTR3, ARF1, ARPC2, BAG5, CAPZB, CD44, CEP41, CFL1, CTNNB1, DLX5, DPYSL2, DYNLL1, DYNLL2, EFNA1, ELAVL4, EZR, FKBP1A, FKBP4, FOXP1, GAP43, GATA3, JUN, KIF5C, KIT, NKX2-1, NR4A3, NRN1, PAFAH1B1, PAK1, PCNT, PHGDH, PRRX1, RAB11A, RAC1, RDX, RIMS2, ROPN1, RPL24, SOD1, SPATA6, STMN1, TEKT1, UBA52, UBB, UBE2B, VIM, WNT5A]
plasma membrane bounded cell projection organization	47	[ACTR3, ARF1, ARPC2, BAG5, CAPZB, CD44, CEP41, CFL1, CTNNB1, DLX5, DPYSL2, DYNLL1, DYNLL2, EFNA1, ELAVL4, EZR, FKBP1A, FKBP4, FOXP1, GAP43, GATA3, JUN, KIF5C, KIT, NKX2-1, NR4A3, NRN1, PAFAH1B1, PAK1, PCNT, PHGDH, PRRX1, RAB11A, RAC1, RDX, RIMS2, ROPN1, RPL24, SOD1, SPATA6, STMN1, TEKT1, UBA52, UBB, UBE2B, VIM, WNT5A]
positive regulation of signaling	47	[APOPT1, ARL2BP, BCL2L11, CA2, CCL14, CD44, CDH3, CITED2, CTNNB1, DDX5, DLX5, EFNA1, FKBP1A, GATA3, GSDME, HAND2, HMGB1, INHBA, JUN, KIT, LAMTOR4, LANCL2, LSM14A, MLLT11, PAFAH1B1, PAIP2, PAK1, PELI1, PRRX1, PTP4A2, RACK1, RAP1B, RHOA, RPL11, RPL26, RPS3, RPS7, SERP1, SOD1, SPIN1, STARD10, TGFB2, UBA52, UBB, UBE2N, UBE2V1, WNT5A]
positive regulation of cell communication	47	[APOPT1, ARL2BP, BCL2L11, CA2, CCL14, CD44, CDH3, CITED2, CTNNB1, DDX5, DLX5, EFNA1, FKBP1A, GATA3, GSDME, HAND2, HMGB1, INHBA, JUN, KIT, LAMTOR4, LANCL2, LSM14A, MLLT11, PAFAH1B1, PAIP2, PAK1, PELI1, PRRX1, PTP4A2, RACK1, RAP1B, RHOA, RPL11, RPL26, RPS3, RPS7, SERP1, SOD1, SPIN1, STARD10, TGFB2, UBA52, UBB, UBE2N, UBE2V1, WNT5A]
positive regulation of signaling	47	[APOPT1, ARL2BP, BCL2L11, CA2, CCL14, CD44, CDH3, CITED2, CTNNB1, DDX5, DLX5, EFNA1, FKBP1A, GATA3, GSDME, HAND2, HMGB1, INHBA, JUN, KIT, LAMTOR4, LANCL2, LSM14A, MLLT11, PAFAH1B1, PAIP2, PAK1, PELI1, PRRX1, PTP4A2, RACK1, RAP1B, RHOA, RPL11, RPL26, RPS3, RPS7, SERP1, SOD1, SPIN1, STARD10, TGFB2, UBA52, UBB, UBE2N, UBE2V1, WNT5A]
positive regulation of cell communication	47	[APOPT1, ARL2BP, BCL2L11, CA2, CCL14, CD44, CDH3, CITED2, CTNNB1, DDX5, DLX5, EFNA1, FKBP1A, GATA3, GSDME, HAND2, HMGB1, INHBA, JUN, KIT, LAMTOR4, LANCL2, LSM14A, MLLT11, PAFAH1B1, PAIP2, PAK1, PELI1, PRRX1, PTP4A2, RACK1, RAP1B, RHOA, RPL11, RPL26, RPS3, RPS7, SERP1, SOD1, SPIN1, STARD10, TGFB2, UBA52, UBB, UBE2N, UBE2V1, WNT5A]
positive regulation of signaling	47	[APOPT1, ARL2BP, BCL2L11, CA2, CCL14, CD44, CDH3, CITED2, CTNNB1, DDX5, DLX5, EFNA1, FKBP1A, GATA3, GSDME, HAND2, HMGB1, INHBA, JUN, KIT, LAMTOR4, LANCL2, LSM14A, MLLT11, PAFAH1B1, PAIP2, PAK1, PELI1, PRRX1, PTP4A2, RACK1, RAP1B, RHOA, RPL11, RPL26, RPS3, RPS7, SERP1, SOD1, SPIN1, STARD10, TGFB2, UBA52, UBB, UBE2N, UBE2V1, WNT5A]
positive regulation of cell communication	47	[APOPT1, ARL2BP, BCL2L11, CA2, CCL14, CD44, CDH3, CITED2, CTNNB1, DDX5, DLX5, EFNA1, FKBP1A, GATA3, GSDME, HAND2, HMGB1, INHBA, JUN, KIT, LAMTOR4, LANCL2, LSM14A, MLLT11, PAFAH1B1, PAIP2, PAK1, PELI1, PRRX1, PTP4A2, RACK1, RAP1B, RHOA, RPL11, RPL26, RPS3, RPS7, SERP1, SOD1, SPIN1, STARD10, TGFB2, UBA52, UBB, UBE2N, UBE2V1, WNT5A]
cell projection organization	47	[ACTR3, ARF1, ARPC2, BAG5, CAPZB, CD44, CEP41, CFL1, CTNNB1, DLX5, DPYSL2, DYNLL1, DYNLL2, EFNA1, ELAVL4, EZR, FKBP1A, FKBP4, FOXP1, GAP43, GATA3, JUN, KIF5C, KIT, NKX2-1, NR4A3, NRN1, PAFAH1B1, PAK1, PCNT, PHGDH, PRRX1, RAB11A, RAC1, RDX, RIMS2, ROPN1, RPL24, SOD1, SPATA6, STMN1, TEKT1, UBA52, UBB, UBE2B, VIM, WNT5A]
plasma membrane bounded cell projection organization	47	[ACTR3, ARF1, ARPC2, BAG5, CAPZB, CD44, CEP41, CFL1, CTNNB1, DLX5, DPYSL2, DYNLL1, DYNLL2, EFNA1, ELAVL4, EZR, FKBP1A, FKBP4, FOXP1, GAP43, GATA3, JUN, KIF5C, KIT, NKX2-1, NR4A3, NRN1, PAFAH1B1, PAK1, PCNT, PHGDH, PRRX1, RAB11A, RAC1, RDX, RIMS2, ROPN1, RPL24, SOD1, SPATA6, STMN1, TEKT1, UBA52, UBB, UBE2B, VIM, WNT5A]
protein complex biogenesis	47	[ACTR3, ADRM1, ALDH5A1, ARF1, ARPC1A, ARPC2, ARPC4, ATL3, BCL2L11, CAPZA2, CAPZA3, CAPZB, CLTA, COX3, COX7A2L, CTNNB1, FBP1, FKBP1A, FKBP4, GLS, GTF2F2, HMGB1, HSP90AA1, HSPA1A, JUN, KCNA4, KHDRBS3, LMO4, MAT2A, MTPN, NDUFA5, NDUFB2, PAK1, PFN1, RAC1, RACK1, RDX, RPS3, S100A10, SDHAF3, SLF1, STMN1, SUMO1, TAF10, TFAM, TRA2B, VPS41]
protein complex assembly	47	[ACTR3, ADRM1, ALDH5A1, ARF1, ARPC1A, ARPC2, ARPC4, ATL3, BCL2L11, CAPZA2, CAPZA3, CAPZB, CLTA, COX3, COX7A2L, CTNNB1, FBP1, FKBP1A, FKBP4, GLS, GTF2F2, HMGB1, HSP90AA1, HSPA1A, JUN, KCNA4, KHDRBS3, LMO4, MAT2A, MTPN, NDUFA5, NDUFB2, PAK1, PFN1, RAC1, RACK1, RDX, RPS3, S100A10, SDHAF3, SLF1, STMN1, SUMO1, TAF10, TFAM, TRA2B, VPS41]
negative regulation of macromolecule biosynthetic process	46	[ANKRD2, BHLHE41, CITED2, CNOT7, CTNNB1, DDX5, DEDD, DNAJB1, EFNA1, EIF4A3, EIF4E, EZR, FBP1, FOXP1, FXR1, GATA3, GPS2, H2AFJ, HDGF, HMGB1, HNRNPU, HSPA1A, JUN, LANCL2, MORF4L1, MPHOSPH8, NCOR1, NKX2-1, NR4A3, OSR1, PAIP2, PKIG, PRDX5, PRRX1, RPL13A, RPS3, RTF1, SUMO1, SYNCRIP, THAP1, TNP1, UBE2B, WNT5A, YBX1, YBX3, YWHAQ]
regulation of organelle organization	46	[ACTR3, APOPT1, ARF1, ARPC1A, ARPC2, ARPC4, ATL3, BCL2L11, BICD2, CAPZA2, CAPZA3, CAPZB, CFL1, CHMP5, CTNNB1, EZR, FKBP4, GATA3, H3F3A, HNRNPU, HSPA1A, HSPA1L, MLLT11, MTPN, NPM2, PAFAH1B1, PAK1, PFN1, PHPT1, PPARGC1A, RAC1, RAD21, RDX, RHOA, RPS3, RTF1, RUVBL1, S100A10, SLF1, STMN1, TRIM36, UBE2B, UBE2N, UBL4B, VPS41, WNT5A]
regulation of organelle organization	46	[ACTR3, APOPT1, ARF1, ARPC1A, ARPC2, ARPC4, ATL3, BCL2L11, BICD2, CAPZA2, CAPZA3, CAPZB, CFL1, CHMP5, CTNNB1, EZR, FKBP4, GATA3, H3F3A, HNRNPU, HSPA1A, HSPA1L, MLLT11, MTPN, NPM2, PAFAH1B1, PAK1, PFN1, PHPT1, PPARGC1A, RAC1, RAD21, RDX, RHOA, RPS3, RTF1, RUVBL1, S100A10, SLF1, STMN1, TRIM36, UBE2B, UBE2N, UBL4B, VPS41, WNT5A]
microtubule cytoskeleton	45	[ARL2BP, ATF4, BCL2L11, BICD2, CCDC77, CEP41, CETN1, CHD4, CLTA, CTNNB1, DCAF12, DPYSL2, DYNLL1, DYNLL2, EZR, FKBP4, GABARAP, GAPDH, GTF2F2, HNRNPU, HSPA1A, HSPB1, KIF22, KIF2C, KIF5C, MAP1LC3A, MAP7, MLLT11, NCOR1, ODF2, PAFAH1B1, PCNT, POLB, RAB11A, RPS3, RPS7, SERP1, SLF1, SPIN1, STMN1, TEKT1, TEX35, TUBB4B, UBXN6, VPS41]
microtubule cytoskeleton	45	[ARL2BP, ATF4, BCL2L11, BICD2, CCDC77, CEP41, CETN1, CHD4, CLTA, CTNNB1, DCAF12, DPYSL2, DYNLL1, DYNLL2, EZR, FKBP4, GABARAP, GAPDH, GTF2F2, HNRNPU, HSPA1A, HSPB1, KIF22, KIF2C, KIF5C, MAP1LC3A, MAP7, MLLT11, NCOR1, ODF2, PAFAH1B1, PCNT, POLB, RAB11A, RPS3, RPS7, SERP1, SLF1, SPIN1, STMN1, TEKT1, TEX35, TUBB4B, UBXN6, VPS41]
nucleolus	45	[ABHD14B, ARL4A, CHD2, COX7A2L, DDX5, DEDD, DNAJB1, EEF1A1, EIF4A3, EZR, GET4, HABP4, ILF2, JPT1, KLHDC3, MORF4L1, MPHOSPH8, NOP10, NOVA1, OSR1, PDHA2, PPP1CB, PRRX1, RPL11, RPL18, RPL26, RPL3, RPL36, RPL5, RPL7, RPS11, RPS3, RPS7, RPS9, RTF1, SPIN1, SRPK2, SRSF9, SUMO1, THAP1, UBA52, UBE2N, UTP18, VRK3, YBX2]
regulation of programmed cell death	45	[ANKRD2, APOPT1, ATF4, BAG5, BCL2L11, BTG1, CD44, CITED2, CTNNB1, CTNNBL1, DEDD, DKKL1, EFNA1, EIF5A, GATA3, GSDME, HAND2, HMGB1, HNRNPK, HSPB1, INHBA, JUN, KIT, LGALS3, MLLT11, NR4A3, OSR1, PABPN1, PAK1, PPARGC1A, PRDX5, RACK1, RETREG1, RPL11, RPL26, RPS3, RPS7, SOD1, TGFB2, TNFRSF21, UBA52, UBB, UBE2B, WNT5A, YBX3]
regulation of programmed cell death	45	[ANKRD2, APOPT1, ATF4, BAG5, BCL2L11, BTG1, CD44, CITED2, CTNNB1, CTNNBL1, DEDD, DKKL1, EFNA1, EIF5A, GATA3, GSDME, HAND2, HMGB1, HNRNPK, HSPB1, INHBA, JUN, KIT, LGALS3, MLLT11, NR4A3, OSR1, PABPN1, PAK1, PPARGC1A, PRDX5, RACK1, RETREG1, RPL11, RPL26, RPS3, RPS7, SOD1, TGFB2, TNFRSF21, UBA52, UBB, UBE2B, WNT5A, YBX3]
microtubule cytoskeleton	45	[ARL2BP, ATF4, BCL2L11, BICD2, CCDC77, CEP41, CETN1, CHD4, CLTA, CTNNB1, DCAF12, DPYSL2, DYNLL1, DYNLL2, EZR, FKBP4, GABARAP, GAPDH, GTF2F2, HNRNPU, HSPA1A, HSPB1, KIF22, KIF2C, KIF5C, MAP1LC3A, MAP7, MLLT11, NCOR1, ODF2, PAFAH1B1, PCNT, POLB, RAB11A, RPS3, RPS7, SERP1, SLF1, SPIN1, STMN1, TEKT1, TEX35, TUBB4B, UBXN6, VPS41]
negative regulation of nucleobase-containing compound metabolic process	45	[ANKRD2, BHLHE41, CITED2, CNOT7, CTNNB1, DDX5, DEDD, DNAJB1, EFNA1, EZR, FBP1, FOXP1, GATA3, GPS2, H2AFJ, HDGF, HMGB1, HNRNPK, HNRNPU, HSPA1A, JUN, LANCL2, MORF4L1, MPHOSPH8, NCOR1, NKX2-1, NR4A3, OSR1, PABPC1, PKIG, PRDX5, PRRX1, RPS3, RTF1, SRSF9, SUMO1, SYNCRIP, THAP1, TNP1, TRA2B, UBE2B, WNT5A, YBX1, YBX3, YWHAQ]
negative regulation of cellular macromolecule biosynthetic process	45	[ANKRD2, BHLHE41, CNOT7, CTNNB1, DDX5, DEDD, DNAJB1, EFNA1, EIF4A3, EIF4E, EZR, FBP1, FOXP1, FXR1, GATA3, GPS2, H2AFJ, HDGF, HMGB1, HNRNPU, HSPA1A, JUN, LANCL2, MORF4L1, MPHOSPH8, NCOR1, NKX2-1, NR4A3, OSR1, PAIP2, PKIG, PRDX5, PRRX1, RPL13A, RPS3, RTF1, SUMO1, SYNCRIP, THAP1, TNP1, UBE2B, WNT5A, YBX1, YBX3, YWHAQ]
microtubule cytoskeleton	45	[ARL2BP, ATF4, BCL2L11, BICD2, CCDC77, CEP41, CETN1, CHD4, CLTA, CTNNB1, DCAF12, DPYSL2, DYNLL1, DYNLL2, EZR, FKBP4, GABARAP, GAPDH, GTF2F2, HNRNPU, HSPA1A, HSPB1, KIF22, KIF2C, KIF5C, MAP1LC3A, MAP7, MLLT11, NCOR1, ODF2, PAFAH1B1, PCNT, POLB, RAB11A, RPS3, RPS7, SERP1, SLF1, SPIN1, STMN1, TEKT1, TEX35, TUBB4B, UBXN6, VPS41]
regulation of programmed cell death	45	[ANKRD2, APOPT1, ATF4, BAG5, BCL2L11, BTG1, CD44, CITED2, CTNNB1, CTNNBL1, DEDD, DKKL1, EFNA1, EIF5A, GATA3, GSDME, HAND2, HMGB1, HNRNPK, HSPB1, INHBA, JUN, KIT, LGALS3, MLLT11, NR4A3, OSR1, PABPN1, PAK1, PPARGC1A, PRDX5, RACK1, RETREG1, RPL11, RPL26, RPS3, RPS7, SOD1, TGFB2, TNFRSF21, UBA52, UBB, UBE2B, WNT5A, YBX3]
microtubule cytoskeleton	45	[ARL2BP, ATF4, BCL2L11, BICD2, CCDC77, CEP41, CETN1, CHD4, CLTA, CTNNB1, DCAF12, DPYSL2, DYNLL1, DYNLL2, EZR, FKBP4, GABARAP, GAPDH, GTF2F2, HNRNPU, HSPA1A, HSPB1, KIF22, KIF2C, KIF5C, MAP1LC3A, MAP7, MLLT11, NCOR1, ODF2, PAFAH1B1, PCNT, POLB, RAB11A, RPS3, RPS7, SERP1, SLF1, SPIN1, STMN1, TEKT1, TEX35, TUBB4B, UBXN6, VPS41]
regulation of programmed cell death	45	[ANKRD2, APOPT1, ATF4, BAG5, BCL2L11, BTG1, CD44, CITED2, CTNNB1, CTNNBL1, DEDD, DKKL1, EFNA1, EIF5A, GATA3, GSDME, HAND2, HMGB1, HNRNPK, HSPB1, INHBA, JUN, KIT, LGALS3, MLLT11, NR4A3, OSR1, PABPN1, PAK1, PPARGC1A, PRDX5, RACK1, RETREG1, RPL11, RPL26, RPS3, RPS7, SOD1, TGFB2, TNFRSF21, UBA52, UBB, UBE2B, WNT5A, YBX3]
intracellular transport	44	[BICD2, CDH3, CHMP5, CLTA, CPLX2, CREB3L2, CTNNB1, DYNLL1, DYNLL2, EIF5A, EZR, HSP90AA1, HSPA1L, HSPB1, KIF5C, KIT, LAMP1, LOC100299503, NPC2, NR4A3, OAZ1, PAFAH1B1, PCNT, POLR2D, RAB11A, RAP1B, RDX, REEP6, RIMS2, RPL11, RPSA, RUVBL1, SEC61B, SLU7, SSR2, UBA52, UBB, UBE2J1, UBL4B, UBXN6, VPS41, YWHAE, YWHAQ, YWHAZ]
intracellular transport	44	[BICD2, CDH3, CHMP5, CLTA, CPLX2, CREB3L2, CTNNB1, DYNLL1, DYNLL2, EIF5A, EZR, HSP90AA1, HSPA1L, HSPB1, KIF5C, KIT, LAMP1, LOC100299503, NPC2, NR4A3, OAZ1, PAFAH1B1, PCNT, POLR2D, RAB11A, RAP1B, RDX, REEP6, RIMS2, RPL11, RPSA, RUVBL1, SEC61B, SLU7, SSR2, UBA52, UBB, UBE2J1, UBL4B, UBXN6, VPS41, YWHAE, YWHAQ, YWHAZ]
intracellular transport	44	[BICD2, CDH3, CHMP5, CLTA, CPLX2, CREB3L2, CTNNB1, DYNLL1, DYNLL2, EIF5A, EZR, HSP90AA1, HSPA1L, HSPB1, KIF5C, KIT, LAMP1, LOC100299503, NPC2, NR4A3, OAZ1, PAFAH1B1, PCNT, POLR2D, RAB11A, RAP1B, RDX, REEP6, RIMS2, RPL11, RPSA, RUVBL1, SEC61B, SLU7, SSR2, UBA52, UBB, UBE2J1, UBL4B, UBXN6, VPS41, YWHAE, YWHAQ, YWHAZ]
regulation of apoptotic process	44	[ANKRD2, APOPT1, ATF4, BAG5, BCL2L11, BTG1, CD44, CITED2, CTNNB1, CTNNBL1, DEDD, DKKL1, EFNA1, EIF5A, GATA3, GSDME, HAND2, HMGB1, HNRNPK, HSPB1, INHBA, JUN, LGALS3, MLLT11, NR4A3, OSR1, PABPN1, PAK1, PPARGC1A, PRDX5, RACK1, RETREG1, RPL11, RPL26, RPS3, RPS7, SOD1, TGFB2, TNFRSF21, UBA52, UBB, UBE2B, WNT5A, YBX3]
regulation of apoptotic process	44	[ANKRD2, APOPT1, ATF4, BAG5, BCL2L11, BTG1, CD44, CITED2, CTNNB1, CTNNBL1, DEDD, DKKL1, EFNA1, EIF5A, GATA3, GSDME, HAND2, HMGB1, HNRNPK, HSPB1, INHBA, JUN, LGALS3, MLLT11, NR4A3, OSR1, PABPN1, PAK1, PPARGC1A, PRDX5, RACK1, RETREG1, RPL11, RPL26, RPS3, RPS7, SOD1, TGFB2, TNFRSF21, UBA52, UBB, UBE2B, WNT5A, YBX3]
positive regulation of signal transduction	44	[APOPT1, ARL2BP, BCL2L11, CCL14, CD44, CDH3, CITED2, CTNNB1, DDX5, DLX5, EFNA1, FKBP1A, GATA3, GSDME, HAND2, HMGB1, INHBA, JUN, KIT, LAMTOR4, LANCL2, LSM14A, MLLT11, PAFAH1B1, PAK1, PELI1, PRRX1, PTP4A2, RACK1, RAP1B, RHOA, RPL11, RPL26, RPS3, RPS7, SOD1, SPIN1, STARD10, TGFB2, UBA52, UBB, UBE2N, UBE2V1, WNT5A]
negative regulation of RNA metabolic process	44	[ANKRD2, BHLHE41, CITED2, CNOT7, CTNNB1, DDX5, DEDD, DNAJB1, EFNA1, EZR, FBP1, FOXP1, GATA3, GPS2, H2AFJ, HDGF, HMGB1, HNRNPK, HNRNPU, HSPA1A, JUN, LANCL2, MORF4L1, MPHOSPH8, NCOR1, NKX2-1, NR4A3, OSR1, PABPC1, PKIG, PRDX5, PRRX1, RTF1, SRSF9, SUMO1, SYNCRIP, THAP1, TNP1, TRA2B, UBE2B, WNT5A, YBX1, YBX3, YWHAQ]
positive regulation of signal transduction	44	[APOPT1, ARL2BP, BCL2L11, CCL14, CD44, CDH3, CITED2, CTNNB1, DDX5, DLX5, EFNA1, FKBP1A, GATA3, GSDME, HAND2, HMGB1, INHBA, JUN, KIT, LAMTOR4, LANCL2, LSM14A, MLLT11, PAFAH1B1, PAK1, PELI1, PRRX1, PTP4A2, RACK1, RAP1B, RHOA, RPL11, RPL26, RPS3, RPS7, SOD1, SPIN1, STARD10, TGFB2, UBA52, UBB, UBE2N, UBE2V1, WNT5A]
cellular macromolecule catabolic process	44	[ADRM1, ARIH1, BAG5, CDC34, CLPP, CNOT7, CSDE1, DDX5, EFNA1, EIF3E, EIF4A3, EZR, FBXO8, GET4, HNRNPU, MGC137055, PABPC1, POLR2D, PSME1, PSMF1, RACK1, RDX, RNASEH1, RNF11, RPL11, RPS7, SEC61B, SKP1, SOD1, SPATA18, SUMO1, SYNCRIP, UBA52, UBB, UBE2B, UBE2J1, UBE2N, UBE2R2, UBXN11, UBXN4, UBXN6, YBX1, ZNRF1, ZNRF4]
organonitrogen compound catabolic process	44	[ADRM1, ALDH5A1, ALLC, ARIH1, ASPDH, BAG5, CD44, CDC34, CLPP, DEDD, EFNA1, EZR, FBXO8, GET4, GLS, LYPLA1, MGC137055, OAZ1, OAZ3, PSME1, PSMF1, RACK1, RDX, RNF11, RPL11, RPS7, SAT1, SEC61B, SKP1, SOD1, SPATA18, SUMO1, UBA52, UBB, UBE2B, UBE2J1, UBE2N, UBE2R2, UBXN11, UBXN4, UBXN6, WNT5A, ZNRF1, ZNRF4]
cellular macromolecule catabolic process	44	[ADRM1, ARIH1, BAG5, CDC34, CLPP, CNOT7, CSDE1, DDX5, EFNA1, EIF3E, EIF4A3, EZR, FBXO8, GET4, HNRNPU, MGC137055, PABPC1, POLR2D, PSME1, PSMF1, RACK1, RDX, RNASEH1, RNF11, RPL11, RPS7, SEC61B, SKP1, SOD1, SPATA18, SUMO1, SYNCRIP, UBA52, UBB, UBE2B, UBE2J1, UBE2N, UBE2R2, UBXN11, UBXN4, UBXN6, YBX1, ZNRF1, ZNRF4]
regulation of apoptotic process	44	[ANKRD2, APOPT1, ATF4, BAG5, BCL2L11, BTG1, CD44, CITED2, CTNNB1, CTNNBL1, DEDD, DKKL1, EFNA1, EIF5A, GATA3, GSDME, HAND2, HMGB1, HNRNPK, HSPB1, INHBA, JUN, LGALS3, MLLT11, NR4A3, OSR1, PABPN1, PAK1, PPARGC1A, PRDX5, RACK1, RETREG1, RPL11, RPL26, RPS3, RPS7, SOD1, TGFB2, TNFRSF21, UBA52, UBB, UBE2B, WNT5A, YBX3]
positive regulation of signal transduction	44	[APOPT1, ARL2BP, BCL2L11, CCL14, CD44, CDH3, CITED2, CTNNB1, DDX5, DLX5, EFNA1, FKBP1A, GATA3, GSDME, HAND2, HMGB1, INHBA, JUN, KIT, LAMTOR4, LANCL2, LSM14A, MLLT11, PAFAH1B1, PAK1, PELI1, PRRX1, PTP4A2, RACK1, RAP1B, RHOA, RPL11, RPL26, RPS3, RPS7, SOD1, SPIN1, STARD10, TGFB2, UBA52, UBB, UBE2N, UBE2V1, WNT5A]
regulation of apoptotic process	44	[ANKRD2, APOPT1, ATF4, BAG5, BCL2L11, BTG1, CD44, CITED2, CTNNB1, CTNNBL1, DEDD, DKKL1, EFNA1, EIF5A, GATA3, GSDME, HAND2, HMGB1, HNRNPK, HSPB1, INHBA, JUN, LGALS3, MLLT11, NR4A3, OSR1, PABPN1, PAK1, PPARGC1A, PRDX5, RACK1, RETREG1, RPL11, RPL26, RPS3, RPS7, SOD1, TGFB2, TNFRSF21, UBA52, UBB, UBE2B, WNT5A, YBX3]
positive regulation of signal transduction	44	[APOPT1, ARL2BP, BCL2L11, CCL14, CD44, CDH3, CITED2, CTNNB1, DDX5, DLX5, EFNA1, FKBP1A, GATA3, GSDME, HAND2, HMGB1, INHBA, JUN, KIT, LAMTOR4, LANCL2, LSM14A, MLLT11, PAFAH1B1, PAK1, PELI1, PRRX1, PTP4A2, RACK1, RAP1B, RHOA, RPL11, RPL26, RPS3, RPS7, SOD1, SPIN1, STARD10, TGFB2, UBA52, UBB, UBE2N, UBE2V1, WNT5A]
RNA processing	43	[CDKAL1, CTNNBL1, DDX5, EIF4A3, ELP5, HABP4, HNRNPH1, HNRNPK, HNRNPL, HNRNPU, KHDRBS3, KLHDC3, LSM2, NCOR1, NOP10, NOVA1, NSUN4, PABPC1, PABPN1, POLR2D, RPL10A, RPL11, RPL14, RPL26, RPL35, RPL36, RPL7, RPS16, RPS17, RPS28, RPS6, RPS7, RPS8, RPSA, SF3B6, SLU7, SRPK2, SRSF3, SRSF9, THUMPD1, TRA2B, UTP18, YBX1]
RNA processing	43	[CDKAL1, CTNNBL1, DDX5, EIF4A3, ELP5, HABP4, HNRNPH1, HNRNPK, HNRNPL, HNRNPU, KHDRBS3, KLHDC3, LSM2, NCOR1, NOP10, NOVA1, NSUN4, PABPC1, PABPN1, POLR2D, RPL10A, RPL11, RPL14, RPL26, RPL35, RPL36, RPL7, RPS16, RPS17, RPS28, RPS6, RPS7, RPS8, RPSA, SF3B6, SLU7, SRPK2, SRSF3, SRSF9, THUMPD1, TRA2B, UTP18, YBX1]
multi-organism reproductive process	43	[ADIG, BCL2L11, CABS1, CAPZA3, CITED2, CTNNB1, CYLC1, CYLC2, DEDD, DKKL1, FKBP4, H3F3A, HSPA1A, HSPA1L, INHBA, KIT, NPM2, OAZ3, ODF1, ODF2, PAFAH1B1, PAIP2, PLCD4, PRM1, PRM2, PRSS37, ROPN1, SOD1, SPA17, SPATA6, SPEM1, SPIN1, TBATA, TNP1, TNP2, TRIM36, TSSK3, TSSK6, UBE2B, UBE2J1, UBE2Q1, WBP2NL, YBX3]
RNA processing	43	[CDKAL1, CTNNBL1, DDX5, EIF4A3, ELP5, HABP4, HNRNPH1, HNRNPK, HNRNPL, HNRNPU, KHDRBS3, KLHDC3, LSM2, NCOR1, NOP10, NOVA1, NSUN4, PABPC1, PABPN1, POLR2D, RPL10A, RPL11, RPL14, RPL26, RPL35, RPL36, RPL7, RPS16, RPS17, RPS28, RPS6, RPS7, RPS8, RPSA, SF3B6, SLU7, SRPK2, SRSF3, SRSF9, THUMPD1, TRA2B, UTP18, YBX1]
RNA processing	43	[CDKAL1, CTNNBL1, DDX5, EIF4A3, ELP5, HABP4, HNRNPH1, HNRNPK, HNRNPL, HNRNPU, KHDRBS3, KLHDC3, LSM2, NCOR1, NOP10, NOVA1, NSUN4, PABPC1, PABPN1, POLR2D, RPL10A, RPL11, RPL14, RPL26, RPL35, RPL36, RPL7, RPS16, RPS17, RPS28, RPS6, RPS7, RPS8, RPSA, SF3B6, SLU7, SRPK2, SRSF3, SRSF9, THUMPD1, TRA2B, UTP18, YBX1]
cytoskeletal protein binding	42	[ACTB, ACTR3, ANKRD2, ARPC1A, ARPC2, ARPC4, BCL2L11, BICD2, CAPZA2, CAPZA3, CAPZB, CETN1, CFL1, DPYSL2, DYNLL1, DYNLL2, EZR, GABARAP, GAPDH, HNRNPU, KIF22, KIF2C, KIF5C, LIMCH1, MYL12A, NCALD, PAFAH1B1, PFN1, PHACTR1, POLB, RAB11A, RDX, RHOA, RPS3, SPATA6, STMN1, TMSB10, TMSB4X, TPM3, TPT1, TRIM36, VPS41]
ribonucleoprotein complex biogenesis	42	[CNOT7, EIF4A3, HSP90AA1, KLHDC3, LSM14A, NOP10, NSUN4, POLR2D, PTGES3, RPL10, RPL10A, RPL11, RPL12, RPL13A, RPL14, RPL24, RPL26, RPL3, RPL35, RPL35A, RPL36, RPL38, RPL5, RPL6, RPL7, RPLP0, RPS15, RPS16, RPS17, RPS18, RPS19, RPS23, RPS28, RPS5, RPS6, RPS7, RPS8, RPSA, RUVBL1, SLU7, SRPK2, UTP18]
ribonucleoprotein complex biogenesis	42	[CNOT7, EIF4A3, HSP90AA1, KLHDC3, LSM14A, NOP10, NSUN4, POLR2D, PTGES3, RPL10, RPL10A, RPL11, RPL12, RPL13A, RPL14, RPL24, RPL26, RPL3, RPL35, RPL35A, RPL36, RPL38, RPL5, RPL6, RPL7, RPLP0, RPS15, RPS16, RPS17, RPS18, RPS19, RPS23, RPS28, RPS5, RPS6, RPS7, RPS8, RPSA, RUVBL1, SLU7, SRPK2, UTP18]
cytoskeletal protein binding	42	[ACTB, ACTR3, ANKRD2, ARPC1A, ARPC2, ARPC4, BCL2L11, BICD2, CAPZA2, CAPZA3, CAPZB, CETN1, CFL1, DPYSL2, DYNLL1, DYNLL2, EZR, GABARAP, GAPDH, HNRNPU, KIF22, KIF2C, KIF5C, LIMCH1, MYL12A, NCALD, PAFAH1B1, PFN1, PHACTR1, POLB, RAB11A, RDX, RHOA, RPS3, SPATA6, STMN1, TMSB10, TMSB4X, TPM3, TPT1, TRIM36, VPS41]
ribonucleoprotein complex biogenesis	42	[CNOT7, EIF4A3, HSP90AA1, KLHDC3, LSM14A, NOP10, NSUN4, POLR2D, PTGES3, RPL10, RPL10A, RPL11, RPL12, RPL13A, RPL14, RPL24, RPL26, RPL3, RPL35, RPL35A, RPL36, RPL38, RPL5, RPL6, RPL7, RPLP0, RPS15, RPS16, RPS17, RPS18, RPS19, RPS23, RPS28, RPS5, RPS6, RPS7, RPS8, RPSA, RUVBL1, SLU7, SRPK2, UTP18]
cytoskeletal protein binding	42	[ACTB, ACTR3, ANKRD2, ARPC1A, ARPC2, ARPC4, BCL2L11, BICD2, CAPZA2, CAPZA3, CAPZB, CETN1, CFL1, DPYSL2, DYNLL1, DYNLL2, EZR, GABARAP, GAPDH, HNRNPU, KIF22, KIF2C, KIF5C, LIMCH1, MYL12A, NCALD, PAFAH1B1, PFN1, PHACTR1, POLB, RAB11A, RDX, RHOA, RPS3, SPATA6, STMN1, TMSB10, TMSB4X, TPM3, TPT1, TRIM36, VPS41]
ribonucleoprotein complex biogenesis	42	[CNOT7, EIF4A3, HSP90AA1, KLHDC3, LSM14A, NOP10, NSUN4, POLR2D, PTGES3, RPL10, RPL10A, RPL11, RPL12, RPL13A, RPL14, RPL24, RPL26, RPL3, RPL35, RPL35A, RPL36, RPL38, RPL5, RPL6, RPL7, RPLP0, RPS15, RPS16, RPS17, RPS18, RPS19, RPS23, RPS28, RPS5, RPS6, RPS7, RPS8, RPSA, RUVBL1, SLU7, SRPK2, UTP18]
positive regulation of cellular component organization	42	[ACTR3, APOPT1, ARF1, ARPC1A, ARPC2, ARPC4, ATL3, BCL2L11, CFL1, CTNNB1, EIF5A, FKBP1A, GATA3, GTF2F2, HNRNPK, HNRNPU, HSPA1A, HSPA1L, JUN, MLLT11, NPM2, PAFAH1B1, PAK1, PFN1, PPARGC1A, RAB11A, RAC1, RACK1, RAD21, RHOA, RIMS2, RPS3, RTF1, RUVBL1, S100A10, SLF1, SUMO1, TGFB2, UBE2B, UBE2N, UBL4B, WNT5A]
organelle assembly	41	[ACTG1, ACTR3, CEP41, CHMP5, CNOT7, DYNLL1, DYNLL2, EZR, FOXP1, GABARAP, HNRNPU, HSPA1A, LSM14A, MAP1LC3A, NCOR1, NSUN4, PAFAH1B1, PCNT, RAB11A, RDX, RHOA, RPL10, RPL11, RPL12, RPL24, RPL3, RPL38, RPL5, RPL6, RPS15, RPS17, RPS19, RPS23, RPS28, RPS3, RPS5, RPSA, SPATA6, TEKT1, UBE2B, WBP2NL]
organelle assembly	41	[ACTG1, ACTR3, CEP41, CHMP5, CNOT7, DYNLL1, DYNLL2, EZR, FOXP1, GABARAP, HNRNPU, HSPA1A, LSM14A, MAP1LC3A, NCOR1, NSUN4, PAFAH1B1, PCNT, RAB11A, RDX, RHOA, RPL10, RPL11, RPL12, RPL24, RPL3, RPL38, RPL5, RPL6, RPS15, RPS17, RPS19, RPS23, RPS28, RPS3, RPS5, RPSA, SPATA6, TEKT1, UBE2B, WBP2NL]
organelle assembly	41	[ACTG1, ACTR3, CEP41, CHMP5, CNOT7, DYNLL1, DYNLL2, EZR, FOXP1, GABARAP, HNRNPU, HSPA1A, LSM14A, MAP1LC3A, NCOR1, NSUN4, PAFAH1B1, PCNT, RAB11A, RDX, RHOA, RPL10, RPL11, RPL12, RPL24, RPL3, RPL38, RPL5, RPL6, RPS15, RPS17, RPS19, RPS23, RPS28, RPS3, RPS5, RPSA, SPATA6, TEKT1, UBE2B, WBP2NL]
generation of neurons	40	[BAG5, CAPZB, CFL1, CTNNB1, DLX5, DPYSL2, EFNA1, EIF4E, ELAVL4, FKBP1A, FKBP4, FOXP1, GAP43, GATA3, GSDME, HAND2, INHBA, JUN, KIF5C, LMO4, MEIS1, NKX2-1, NR4A3, NRN1, PAFAH1B1, PAK1, PHGDH, PRRX1, RAB11A, RHOA, RIMS2, RPL24, SOD1, STMN1, TNFRSF21, UBA52, UBB, VIM, WNT5A, YWHAE]
generation of neurons	40	[BAG5, CAPZB, CFL1, CTNNB1, DLX5, DPYSL2, EFNA1, EIF4E, ELAVL4, FKBP1A, FKBP4, FOXP1, GAP43, GATA3, GSDME, HAND2, INHBA, JUN, KIF5C, LMO4, MEIS1, NKX2-1, NR4A3, NRN1, PAFAH1B1, PAK1, PHGDH, PRRX1, RAB11A, RHOA, RIMS2, RPL24, SOD1, STMN1, TNFRSF21, UBA52, UBB, VIM, WNT5A, YWHAE]
sexual reproduction	40	[ADIG, BCL2L11, CABS1, CAPZA3, CTNNB1, CYLC1, CYLC2, DKKL1, H3F3A, HSPA1A, HSPA1L, INHBA, KIT, NPM2, OAZ3, ODF1, ODF2, PAFAH1B1, PAIP2, PLCD4, PRM1, PRM2, PRSS37, ROPN1, SOD1, SPA17, SPATA6, SPEM1, SPIN1, TBATA, TNP1, TNP2, TRIM36, TSSK3, TSSK6, UBE2B, UBE2J1, UBE2Q1, WBP2NL, YBX3]
generation of neurons	40	[BAG5, CAPZB, CFL1, CTNNB1, DLX5, DPYSL2, EFNA1, EIF4E, ELAVL4, FKBP1A, FKBP4, FOXP1, GAP43, GATA3, GSDME, HAND2, INHBA, JUN, KIF5C, LMO4, MEIS1, NKX2-1, NR4A3, NRN1, PAFAH1B1, PAK1, PHGDH, PRRX1, RAB11A, RHOA, RIMS2, RPL24, SOD1, STMN1, TNFRSF21, UBA52, UBB, VIM, WNT5A, YWHAE]
generation of neurons	40	[BAG5, CAPZB, CFL1, CTNNB1, DLX5, DPYSL2, EFNA1, EIF4E, ELAVL4, FKBP1A, FKBP4, FOXP1, GAP43, GATA3, GSDME, HAND2, INHBA, JUN, KIF5C, LMO4, MEIS1, NKX2-1, NR4A3, NRN1, PAFAH1B1, PAK1, PHGDH, PRRX1, RAB11A, RHOA, RIMS2, RPL24, SOD1, STMN1, TNFRSF21, UBA52, UBB, VIM, WNT5A, YWHAE]
regulation of cellular component biogenesis	39	[ACTR3, ARF1, ARPC1A, ARPC2, ARPC4, BAG5, BCL2L11, CAPZA2, CAPZA3, CAPZB, CHMP5, CTNNB1, DNAJA4, DNAJB8, EZR, GAP43, GTF2F2, H3F3A, HMGB1, HNRNPU, HSPA1A, JUN, LMO4, MTPN, PAK1, PFN1, RAC1, RACK1, RAP1B, RDX, RHOA, RPL13A, RPS3, S100A10, SLF1, STMN1, SUMO1, VPS41, WNT5A]
chromosome	39	[ACTB, ANKRD2, CHD4, CITED2, CTNNB1, DLX5, DYNLL1, GATA3, H2AFJ, H3F3A, HAND2, HILS1, HIST1H2BD, HMGB1, HMGB3, HMGB4, HMGN1, HNRNPK, HNRNPU, JUN, KIF22, KIF2C, KLHDC3, MPHOSPH8, NCOR1, NPM2, PAFAH1B1, PPP1CB, PRM1, PRM2, RAD21, RUVBL1, SLF1, SSRP1, SUMO1, SWI5, TNP1, TNP2, UBE2B]
embryo development	39	[AKIRIN2, BCL2L11, BTF3, CFL1, CITED2, CTNNB1, DLX5, EFNA1, EIF4A3, ELF5, FOXP1, GATA3, GPI, HAND2, INHBA, INSIG2, KIT, LMO4, NMT1, NPM2, NR4A3, OSR1, PAFAH1B1, PHGDH, POLG2, PRRX1, RACK1, RPL10, RPL38, RTF1, SF3B6, SOD1, TGFB2, TRA2B, UBE2B, VIM, WNT5A, YBX1, YBX3]
embryo development	39	[AKIRIN2, BCL2L11, BTF3, CFL1, CITED2, CTNNB1, DLX5, EFNA1, EIF4A3, ELF5, FOXP1, GATA3, GPI, HAND2, INHBA, INSIG2, KIT, LMO4, NMT1, NPM2, NR4A3, OSR1, PAFAH1B1, PHGDH, POLG2, PRRX1, RACK1, RPL10, RPL38, RTF1, SF3B6, SOD1, TGFB2, TRA2B, UBE2B, VIM, WNT5A, YBX1, YBX3]
embryo development	39	[AKIRIN2, BCL2L11, BTF3, CFL1, CITED2, CTNNB1, DLX5, EFNA1, EIF4A3, ELF5, FOXP1, GATA3, GPI, HAND2, INHBA, INSIG2, KIT, LMO4, NMT1, NPM2, NR4A3, OSR1, PAFAH1B1, PHGDH, POLG2, PRRX1, RACK1, RPL10, RPL38, RTF1, SF3B6, SOD1, TGFB2, TRA2B, UBE2B, VIM, WNT5A, YBX1, YBX3]
negative regulation of RNA biosynthetic process	39	[ANKRD2, BHLHE41, CITED2, CNOT7, CTNNB1, DDX5, DEDD, DNAJB1, EFNA1, EZR, FBP1, FOXP1, GATA3, GPS2, H2AFJ, HDGF, HMGB1, HNRNPU, HSPA1A, JUN, LANCL2, MORF4L1, MPHOSPH8, NCOR1, NKX2-1, NR4A3, OSR1, PKIG, PRDX5, PRRX1, RTF1, SUMO1, THAP1, TNP1, UBE2B, WNT5A, YBX1, YBX3, YWHAQ]
negative regulation of nucleic acid-templated transcription	39	[ANKRD2, BHLHE41, CITED2, CNOT7, CTNNB1, DDX5, DEDD, DNAJB1, EFNA1, EZR, FBP1, FOXP1, GATA3, GPS2, H2AFJ, HDGF, HMGB1, HNRNPU, HSPA1A, JUN, LANCL2, MORF4L1, MPHOSPH8, NCOR1, NKX2-1, NR4A3, OSR1, PKIG, PRDX5, PRRX1, RTF1, SUMO1, THAP1, TNP1, UBE2B, WNT5A, YBX1, YBX3, YWHAQ]
embryo development	39	[AKIRIN2, BCL2L11, BTF3, CFL1, CITED2, CTNNB1, DLX5, EFNA1, EIF4A3, ELF5, FOXP1, GATA3, GPI, HAND2, INHBA, INSIG2, KIT, LMO4, NMT1, NPM2, NR4A3, OSR1, PAFAH1B1, PHGDH, POLG2, PRRX1, RACK1, RPL10, RPL38, RTF1, SF3B6, SOD1, TGFB2, TRA2B, UBE2B, VIM, WNT5A, YBX1, YBX3]
regulation of cellular component biogenesis	39	[ACTR3, ARF1, ARPC1A, ARPC2, ARPC4, BAG5, BCL2L11, CAPZA2, CAPZA3, CAPZB, CHMP5, CTNNB1, DNAJA4, DNAJB8, EZR, GAP43, GTF2F2, H3F3A, HMGB1, HNRNPU, HSPA1A, JUN, LMO4, MTPN, PAK1, PFN1, RAC1, RACK1, RAP1B, RDX, RHOA, RPL13A, RPS3, S100A10, SLF1, STMN1, SUMO1, VPS41, WNT5A]
embryo development	39	[AKIRIN2, BCL2L11, BTF3, CFL1, CITED2, CTNNB1, DLX5, EFNA1, EIF4A3, ELF5, FOXP1, GATA3, GPI, HAND2, INHBA, INSIG2, KIT, LMO4, NMT1, NPM2, NR4A3, OSR1, PAFAH1B1, PHGDH, POLG2, PRRX1, RACK1, RPL10, RPL38, RTF1, SF3B6, SOD1, TGFB2, TRA2B, UBE2B, VIM, WNT5A, YBX1, YBX3]
nucleoplasm part	38	[ACTB, ANKRD2, ARIH1, CDC34, CHD4, CHD5, CNOT7, CWC25, DAZAP2, EIF3E, EIF4A3, ELMSAN1, GPATCH2, GTF2F2, HABP4, HNRNPU, KIF22, LPXN, MORF4L1, NCOR1, NOP10, PABPN1, PCBP1, PHF7, POLR2D, PPARGC1A, RETREG1, RTF1, RUVBL1, S100A14, SLC2A4RG, SLU7, SRSF3, SUMO1, SUMO2, TAF10, TAF12, THAP1]
envelope	38	[ARL2BP, BICD2, CABS1, CHCHD2, CISD1, COX1, COX4I1, COX7A2, COX7A2L, COX7B, CSDE1, EIF5A, FUNDC2, JPT1, LGALS3, LMNB2, LPIN1, NDUFA5, NDUFB2, PAFAH1B1, PLCD4, PRELID2, ROMO1, RPS3, SDHAF3, SDHB, SLC25A3, SLC25A39, SLC25A6, SORD, SPAG4, SPATA18, SPIN1, SUMO1, TRA2B, UBXN4, UTP18, YBX1]
organelle envelope	38	[ARL2BP, BICD2, CABS1, CHCHD2, CISD1, COX1, COX4I1, COX7A2, COX7A2L, COX7B, CSDE1, EIF5A, FUNDC2, JPT1, LGALS3, LMNB2, LPIN1, NDUFA5, NDUFB2, PAFAH1B1, PLCD4, PRELID2, ROMO1, RPS3, SDHAF3, SDHB, SLC25A3, SLC25A39, SLC25A6, SORD, SPAG4, SPATA18, SPIN1, SUMO1, TRA2B, UBXN4, UTP18, YBX1]
negative regulation of transcription, DNA-templated	38	[ANKRD2, BHLHE41, CNOT7, CTNNB1, DDX5, DEDD, DNAJB1, EFNA1, EZR, FBP1, FOXP1, GATA3, GPS2, H2AFJ, HDGF, HMGB1, HNRNPU, HSPA1A, JUN, LANCL2, MORF4L1, MPHOSPH8, NCOR1, NKX2-1, NR4A3, OSR1, PKIG, PRDX5, PRRX1, RTF1, SUMO1, THAP1, TNP1, UBE2B, WNT5A, YBX1, YBX3, YWHAQ]
supramolecular fiber	38	[ACTG1, AK1, ANKRD2, ARF1, CAPZB, CTNNB1, DPYSL2, DYNLL1, DYNLL2, EZR, FKBP1A, FKBP4, FXR1, GABARAP, HABP4, HNRNPU, HSPB1, JPH1, KIF22, KIF2C, KIF5C, KRT24, LMNB2, MAP1LC3A, MYL12A, NCOR1, ODF1, ODF2, PAFAH1B1, POLB, RAB11A, RAC1, SERP1, STMN1, TEKT1, TPM3, TUBB4B, VIM]
positive regulation of transcription from RNA polymerase II promoter	38	[ABHD14B, AKIRIN2, ATF4, CHCHD2, CITED2, CNOT7, CREB3L2, CTNNB1, DLX5, EIF4A3, ELF5, FOXP1, GATA3, GTF2F1, GTF2F2, HAND2, HMGB1, HNRNPK, HNRNPU, INHBA, INSIG2, IRF6, JUN, LMO4, LPIN1, MEIS1, NKX2-1, NR4A3, OSR1, PCBP1, PPARGC1A, PRRX1, RAD21, RTF1, SIX6, TFAM, WNT5A, YBX1]
nucleoplasm part	38	[ACTB, ANKRD2, ARIH1, CDC34, CHD4, CHD5, CNOT7, CWC25, DAZAP2, EIF3E, EIF4A3, ELMSAN1, GPATCH2, GTF2F2, HABP4, HNRNPU, KIF22, LPXN, MORF4L1, NCOR1, NOP10, PABPN1, PCBP1, PHF7, POLR2D, PPARGC1A, RETREG1, RTF1, RUVBL1, S100A14, SLC2A4RG, SLU7, SRSF3, SUMO1, SUMO2, TAF10, TAF12, THAP1]
neuron differentiation	38	[BAG5, CAPZB, CFL1, CTNNB1, DLX5, DPYSL2, EFNA1, EIF4E, ELAVL4, FKBP1A, FKBP4, FOXP1, GAP43, GATA3, GSDME, HAND2, INHBA, JUN, KIF5C, LMO4, MEIS1, NKX2-1, NR4A3, NRN1, PAFAH1B1, PAK1, PHGDH, PRRX1, RAB11A, RHOA, RIMS2, RPL24, SOD1, STMN1, UBA52, UBB, VIM, WNT5A]
positive regulation of transcription from RNA polymerase II promoter	38	[ABHD14B, AKIRIN2, ATF4, CHCHD2, CITED2, CNOT7, CREB3L2, CTNNB1, DLX5, EIF4A3, ELF5, FOXP1, GATA3, GTF2F1, GTF2F2, HAND2, HMGB1, HNRNPK, HNRNPU, INHBA, INSIG2, IRF6, JUN, LMO4, LPIN1, MEIS1, NKX2-1, NR4A3, OSR1, PCBP1, PPARGC1A, PRRX1, RAD21, RTF1, SIX6, TFAM, WNT5A, YBX1]
supramolecular fiber	38	[ACTG1, AK1, ANKRD2, ARF1, CAPZB, CTNNB1, DPYSL2, DYNLL1, DYNLL2, EZR, FKBP1A, FKBP4, FXR1, GABARAP, HABP4, HNRNPU, HSPB1, JPH1, KIF22, KIF2C, KIF5C, KRT24, LMNB2, MAP1LC3A, MYL12A, NCOR1, ODF1, ODF2, PAFAH1B1, POLB, RAB11A, RAC1, SERP1, STMN1, TEKT1, TPM3, TUBB4B, VIM]
negative regulation of transcription, DNA-templated	38	[ANKRD2, BHLHE41, CNOT7, CTNNB1, DDX5, DEDD, DNAJB1, EFNA1, EZR, FBP1, FOXP1, GATA3, GPS2, H2AFJ, HDGF, HMGB1, HNRNPU, HSPA1A, JUN, LANCL2, MORF4L1, MPHOSPH8, NCOR1, NKX2-1, NR4A3, OSR1, PKIG, PRDX5, PRRX1, RTF1, SUMO1, THAP1, TNP1, UBE2B, WNT5A, YBX1, YBX3, YWHAQ]
supramolecular fiber	38	[ACTG1, AK1, ANKRD2, ARF1, CAPZB, CTNNB1, DPYSL2, DYNLL1, DYNLL2, EZR, FKBP1A, FKBP4, FXR1, GABARAP, HABP4, HNRNPU, HSPB1, JPH1, KIF22, KIF2C, KIF5C, KRT24, LMNB2, MAP1LC3A, MYL12A, NCOR1, ODF1, ODF2, PAFAH1B1, POLB, RAB11A, RAC1, SERP1, STMN1, TEKT1, TPM3, TUBB4B, VIM]
positive regulation of transcription from RNA polymerase II promoter	38	[ABHD14B, AKIRIN2, ATF4, CHCHD2, CITED2, CNOT7, CREB3L2, CTNNB1, DLX5, EIF4A3, ELF5, FOXP1, GATA3, GTF2F1, GTF2F2, HAND2, HMGB1, HNRNPK, HNRNPU, INHBA, INSIG2, IRF6, JUN, LMO4, LPIN1, MEIS1, NKX2-1, NR4A3, OSR1, PCBP1, PPARGC1A, PRRX1, RAD21, RTF1, SIX6, TFAM, WNT5A, YBX1]
protein catabolic process	38	[ADRM1, ARIH1, BAG5, CDC34, CLPP, DEDD, EFNA1, EZR, FBXO8, GET4, LYPLA1, MGC137055, OAZ1, OAZ3, PSME1, PSMF1, RACK1, RDX, RNF11, RPL11, RPS7, SEC61B, SKP1, SOD1, SPATA18, SUMO1, UBA52, UBB, UBE2B, UBE2J1, UBE2N, UBE2R2, UBXN11, UBXN4, UBXN6, WNT5A, ZNRF1, ZNRF4]
neuron differentiation	38	[BAG5, CAPZB, CFL1, CTNNB1, DLX5, DPYSL2, EFNA1, EIF4E, ELAVL4, FKBP1A, FKBP4, FOXP1, GAP43, GATA3, GSDME, HAND2, INHBA, JUN, KIF5C, LMO4, MEIS1, NKX2-1, NR4A3, NRN1, PAFAH1B1, PAK1, PHGDH, PRRX1, RAB11A, RHOA, RIMS2, RPL24, SOD1, STMN1, UBA52, UBB, VIM, WNT5A]
adherens junction	38	[ACTB, ACTG1, ACTR3, ARF1, ARPC2, CD44, CDH3, CFL1, CTNNB1, EZR, HNRNPK, HSPB1, LPXN, PAK1, PPP1CB, RAC1, RDX, RHOA, RPL10A, RPL12, RPL18, RPL37A, RPL7, RPLP0, RPLP1, RPS11, RPS17, RPS18, RPS3, RPS5, RPS7, RPS8, RPS9, TES, VIM, YWHAE, YWHAQ, YWHAZ]
neuron differentiation	38	[BAG5, CAPZB, CFL1, CTNNB1, DLX5, DPYSL2, EFNA1, EIF4E, ELAVL4, FKBP1A, FKBP4, FOXP1, GAP43, GATA3, GSDME, HAND2, INHBA, JUN, KIF5C, LMO4, MEIS1, NKX2-1, NR4A3, NRN1, PAFAH1B1, PAK1, PHGDH, PRRX1, RAB11A, RHOA, RIMS2, RPL24, SOD1, STMN1, UBA52, UBB, VIM, WNT5A]
positive regulation of transcription from RNA polymerase II promoter	38	[ABHD14B, AKIRIN2, ATF4, CHCHD2, CITED2, CNOT7, CREB3L2, CTNNB1, DLX5, EIF4A3, ELF5, FOXP1, GATA3, GTF2F1, GTF2F2, HAND2, HMGB1, HNRNPK, HNRNPU, INHBA, INSIG2, IRF6, JUN, LMO4, LPIN1, MEIS1, NKX2-1, NR4A3, OSR1, PCBP1, PPARGC1A, PRRX1, RAD21, RTF1, SIX6, TFAM, WNT5A, YBX1]
protein modification by small protein conjugation or removal	37	[ARIH1, ASPDH, BAG5, CDC34, CTNNB1, DCUN1D1, DCUN1D5, FKBP1A, HSP90AA1, LTN1, MPHOSPH8, OTUB2, PELI1, RACK1, RNF11, RPL11, RPS3, RPS7, SKP1, SOD1, SUMO1, SUMO2, TAF10, TRIM36, UBA52, UBB, UBE2B, UBE2D2, UBE2F, UBE2J1, UBE2M, UBE2N, UBE2Q1, UBE2R2, UBE2V1, ZNRF1, ZNRF4]
protein modification by small protein conjugation or removal	37	[ARIH1, ASPDH, BAG5, CDC34, CTNNB1, DCUN1D1, DCUN1D5, FKBP1A, HSP90AA1, LTN1, MPHOSPH8, OTUB2, PELI1, RACK1, RNF11, RPL11, RPS3, RPS7, SKP1, SOD1, SUMO1, SUMO2, TAF10, TRIM36, UBA52, UBB, UBE2B, UBE2D2, UBE2F, UBE2J1, UBE2M, UBE2N, UBE2Q1, UBE2R2, UBE2V1, ZNRF1, ZNRF4]
protein modification by small protein conjugation or removal	37	[ARIH1, ASPDH, BAG5, CDC34, CTNNB1, DCUN1D1, DCUN1D5, FKBP1A, HSP90AA1, LTN1, MPHOSPH8, OTUB2, PELI1, RACK1, RNF11, RPL11, RPS3, RPS7, SKP1, SOD1, SUMO1, SUMO2, TAF10, TRIM36, UBA52, UBB, UBE2B, UBE2D2, UBE2F, UBE2J1, UBE2M, UBE2N, UBE2Q1, UBE2R2, UBE2V1, ZNRF1, ZNRF4]
cell-substrate adherens junction	37	[ACTB, ACTG1, ACTR3, ARF1, ARPC2, CD44, CFL1, CTNNB1, EZR, HNRNPK, HSPB1, LPXN, PAK1, PPP1CB, RAC1, RDX, RHOA, RPL10A, RPL12, RPL18, RPL37A, RPL7, RPLP0, RPLP1, RPS11, RPS17, RPS18, RPS3, RPS5, RPS7, RPS8, RPS9, TES, VIM, YWHAE, YWHAQ, YWHAZ]
focal adhesion	37	[ACTB, ACTG1, ACTR3, ARF1, ARPC2, CD44, CFL1, CTNNB1, EZR, HNRNPK, HSPB1, LPXN, PAK1, PPP1CB, RAC1, RDX, RHOA, RPL10A, RPL12, RPL18, RPL37A, RPL7, RPLP0, RPLP1, RPS11, RPS17, RPS18, RPS3, RPS5, RPS7, RPS8, RPS9, TES, VIM, YWHAE, YWHAQ, YWHAZ]
cellular component morphogenesis	36	[ACTG1, ARPC2, CAPZB, CD44, CFL1, CSNK1G2, CTNNB1, DLX5, DPYSL2, EFNA1, ELAVL4, EZR, FOXP1, GAP43, GATA3, KIF5C, KIT, NKX2-1, NR4A3, NRN1, PAFAH1B1, PAK1, POLG2, RAB11A, RAC1, RDX, RIMS2, RPL24, S100A10, SOD1, STMN1, TGFB2, UBA52, UBB, VRK3, WNT5A]
multicellular organismal reproductive process	36	[ADIG, BCL2L11, CABS1, CAPZA3, CITED2, CTNNB1, CYLC1, CYLC2, DEDD, DKKL1, H3F3A, HSPA1A, INHBA, KIT, NPM2, OAZ3, ODF1, ODF2, PAFAH1B1, PAIP2, PRM1, PRM2, ROPN1, SOD1, SPATA6, SPEM1, SPIN1, TBATA, TNP1, TNP2, TSSK3, TSSK6, UBE2B, UBE2J1, UBE2Q1, YBX3]
cell cycle process	36	[ACTR3, AK1, ARF1, CCNY, CFL1, CHMP5, CTNNB1, EIF4E, EZR, HNRNPU, HSPA1A, INHBA, IRF6, KIF22, KIF2C, NCOR1, NPM2, ODF2, PAFAH1B1, PCNT, PHGDH, PSME1, RAB11A, RAD21, RDX, RHOA, RPL24, RPL26, RPS3, SLF1, STMN1, TAF10, TGFB2, TRIM36, UBE2B, WNT5A]
cellular component morphogenesis	36	[ACTG1, ARPC2, CAPZB, CD44, CFL1, CSNK1G2, CTNNB1, DLX5, DPYSL2, EFNA1, ELAVL4, EZR, FOXP1, GAP43, GATA3, KIF5C, KIT, NKX2-1, NR4A3, NRN1, PAFAH1B1, PAK1, POLG2, RAB11A, RAC1, RDX, RIMS2, RPL24, S100A10, SOD1, STMN1, TGFB2, UBA52, UBB, VRK3, WNT5A]
cell cycle process	36	[ACTR3, AK1, ARF1, CCNY, CFL1, CHMP5, CTNNB1, EIF4E, EZR, HNRNPU, HSPA1A, INHBA, IRF6, KIF22, KIF2C, NCOR1, NPM2, ODF2, PAFAH1B1, PCNT, PHGDH, PSME1, RAB11A, RAD21, RDX, RHOA, RPL24, RPL26, RPS3, SLF1, STMN1, TAF10, TGFB2, TRIM36, UBE2B, WNT5A]
chromosomal part	35	[ACTB, ANKRD2, CHD4, CITED2, CTNNB1, DLX5, DYNLL1, GATA3, H2AFJ, H3F3A, HAND2, HILS1, HIST1H2BD, HMGB1, HMGN1, HNRNPK, HNRNPU, JUN, KIF22, KIF2C, KLHDC3, MPHOSPH8, NCOR1, NPM2, PAFAH1B1, PPP1CB, PRM1, PRM2, RAD21, RUVBL1, SLF1, SWI5, TNP1, TNP2, UBE2B]
chromosomal part	35	[ACTB, ANKRD2, CHD4, CITED2, CTNNB1, DLX5, DYNLL1, GATA3, H2AFJ, H3F3A, HAND2, HILS1, HIST1H2BD, HMGB1, HMGN1, HNRNPK, HNRNPU, JUN, KIF22, KIF2C, KLHDC3, MPHOSPH8, NCOR1, NPM2, PAFAH1B1, PPP1CB, PRM1, PRM2, RAD21, RUVBL1, SLF1, SWI5, TNP1, TNP2, UBE2B]
chromosomal part	35	[ACTB, ANKRD2, CHD4, CITED2, CTNNB1, DLX5, DYNLL1, GATA3, H2AFJ, H3F3A, HAND2, HILS1, HIST1H2BD, HMGB1, HMGN1, HNRNPK, HNRNPU, JUN, KIF22, KIF2C, KLHDC3, MPHOSPH8, NCOR1, NPM2, PAFAH1B1, PPP1CB, PRM1, PRM2, RAD21, RUVBL1, SLF1, SWI5, TNP1, TNP2, UBE2B]
epithelium development	34	[BTG1, CA2, CD44, CDH3, CFL1, CITED2, CTNNB1, DLX5, ELF5, EZR, FOXP1, GATA3, HAND2, INHBA, IRF6, JUN, LBH, LELP1, LGALS3, LMO4, NKX2-1, OSR1, PAFAH1B1, PAK1, PHGDH, RAP1B, RDX, RHOA, SOD1, TAF10, TAGLN2, TGFB2, VIM, WNT5A]
protein modification by small protein conjugation	34	[ARIH1, BAG5, CDC34, CTNNB1, DCUN1D1, DCUN1D5, FKBP1A, HSP90AA1, LTN1, MPHOSPH8, PELI1, RACK1, RNF11, RPL11, RPS3, RPS7, SKP1, SOD1, SUMO1, SUMO2, TRIM36, UBA52, UBB, UBE2B, UBE2D2, UBE2F, UBE2J1, UBE2M, UBE2N, UBE2Q1, UBE2R2, UBE2V1, ZNRF1, ZNRF4]
epithelium development	34	[BTG1, CA2, CD44, CDH3, CFL1, CITED2, CTNNB1, DLX5, ELF5, EZR, FOXP1, GATA3, HAND2, INHBA, IRF6, JUN, LBH, LELP1, LGALS3, LMO4, NKX2-1, OSR1, PAFAH1B1, PAK1, PHGDH, RAP1B, RDX, RHOA, SOD1, TAF10, TAGLN2, TGFB2, VIM, WNT5A]
epithelium development	34	[BTG1, CA2, CD44, CDH3, CFL1, CITED2, CTNNB1, DLX5, ELF5, EZR, FOXP1, GATA3, HAND2, INHBA, IRF6, JUN, LBH, LELP1, LGALS3, LMO4, NKX2-1, OSR1, PAFAH1B1, PAK1, PHGDH, RAP1B, RDX, RHOA, SOD1, TAF10, TAGLN2, TGFB2, VIM, WNT5A]
protein modification by small protein conjugation	34	[ARIH1, BAG5, CDC34, CTNNB1, DCUN1D1, DCUN1D5, FKBP1A, HSP90AA1, LTN1, MPHOSPH8, PELI1, RACK1, RNF11, RPL11, RPS3, RPS7, SKP1, SOD1, SUMO1, SUMO2, TRIM36, UBA52, UBB, UBE2B, UBE2D2, UBE2F, UBE2J1, UBE2M, UBE2N, UBE2Q1, UBE2R2, UBE2V1, ZNRF1, ZNRF4]
epithelium development	34	[BTG1, CA2, CD44, CDH3, CFL1, CITED2, CTNNB1, DLX5, ELF5, EZR, FOXP1, GATA3, HAND2, INHBA, IRF6, JUN, LBH, LELP1, LGALS3, LMO4, NKX2-1, OSR1, PAFAH1B1, PAK1, PHGDH, RAP1B, RDX, RHOA, SOD1, TAF10, TAGLN2, TGFB2, VIM, WNT5A]
cell morphogenesis	34	[ARPC2, CAPZB, CD44, CFL1, CSNK1G2, CTNNB1, DLX5, DPYSL2, EFNA1, ELAVL4, EZR, FOXP1, GAP43, GATA3, KIF5C, KIT, NKX2-1, NR4A3, NRN1, PAFAH1B1, PAK1, RAB11A, RAC1, RDX, RIMS2, RPL24, S100A10, SOD1, STMN1, TGFB2, UBA52, UBB, VRK3, WNT5A]
epithelium development	34	[BTG1, CA2, CD44, CDH3, CFL1, CITED2, CTNNB1, DLX5, ELF5, EZR, FOXP1, GATA3, HAND2, INHBA, IRF6, JUN, LBH, LELP1, LGALS3, LMO4, NKX2-1, OSR1, PAFAH1B1, PAK1, PHGDH, RAP1B, RDX, RHOA, SOD1, TAF10, TAGLN2, TGFB2, VIM, WNT5A]
protein modification by small protein conjugation	34	[ARIH1, BAG5, CDC34, CTNNB1, DCUN1D1, DCUN1D5, FKBP1A, HSP90AA1, LTN1, MPHOSPH8, PELI1, RACK1, RNF11, RPL11, RPS3, RPS7, SKP1, SOD1, SUMO1, SUMO2, TRIM36, UBA52, UBB, UBE2B, UBE2D2, UBE2F, UBE2J1, UBE2M, UBE2N, UBE2Q1, UBE2R2, UBE2V1, ZNRF1, ZNRF4]
protein modification by small protein conjugation	34	[ARIH1, BAG5, CDC34, CTNNB1, DCUN1D1, DCUN1D5, FKBP1A, HSP90AA1, LTN1, MPHOSPH8, PELI1, RACK1, RNF11, RPL11, RPS3, RPS7, SKP1, SOD1, SUMO1, SUMO2, TRIM36, UBA52, UBB, UBE2B, UBE2D2, UBE2F, UBE2J1, UBE2M, UBE2N, UBE2Q1, UBE2R2, UBE2V1, ZNRF1, ZNRF4]
epithelium development	34	[BTG1, CA2, CD44, CDH3, CFL1, CITED2, CTNNB1, DLX5, ELF5, EZR, FOXP1, GATA3, HAND2, INHBA, IRF6, JUN, LBH, LELP1, LGALS3, LMO4, NKX2-1, OSR1, PAFAH1B1, PAK1, PHGDH, RAP1B, RDX, RHOA, SOD1, TAF10, TAGLN2, TGFB2, VIM, WNT5A]
cell morphogenesis	34	[ARPC2, CAPZB, CD44, CFL1, CSNK1G2, CTNNB1, DLX5, DPYSL2, EFNA1, ELAVL4, EZR, FOXP1, GAP43, GATA3, KIF5C, KIT, NKX2-1, NR4A3, NRN1, PAFAH1B1, PAK1, RAB11A, RAC1, RDX, RIMS2, RPL24, S100A10, SOD1, STMN1, TGFB2, UBA52, UBB, VRK3, WNT5A]
epithelium development	34	[BTG1, CA2, CD44, CDH3, CFL1, CITED2, CTNNB1, DLX5, ELF5, EZR, FOXP1, GATA3, HAND2, INHBA, IRF6, JUN, LBH, LELP1, LGALS3, LMO4, NKX2-1, OSR1, PAFAH1B1, PAK1, PHGDH, RAP1B, RDX, RHOA, SOD1, TAF10, TAGLN2, TGFB2, VIM, WNT5A]
cellular protein catabolic process	33	[ADRM1, ARIH1, BAG5, CDC34, CLPP, EFNA1, EZR, FBXO8, GET4, MGC137055, PSME1, PSMF1, RACK1, RDX, RNF11, RPL11, RPS7, SEC61B, SKP1, SOD1, SPATA18, SUMO1, UBA52, UBB, UBE2B, UBE2J1, UBE2N, UBE2R2, UBXN11, UBXN4, UBXN6, ZNRF1, ZNRF4]
mitochondrial part	32	[ARL2BP, CABS1, CHCHD2, CISD1, CLPP, COX1, COX4I1, COX7A2, COX7A2L, COX7B, CSDE1, FDX1, FUNDC2, GLS, LGALS3, LPIN1, MRPL40, NDUFA5, NDUFB2, NSUN4, POLG2, PRELID2, ROMO1, RPS3, SDHAF3, SDHB, SLC25A3, SLC25A39, SLC25A6, SORD, SPATA18, TFAM]
ribosome biogenesis	32	[EIF4A3, KLHDC3, NOP10, NSUN4, RPL10, RPL10A, RPL11, RPL12, RPL14, RPL24, RPL26, RPL3, RPL35, RPL35A, RPL36, RPL38, RPL5, RPL6, RPL7, RPLP0, RPS15, RPS16, RPS17, RPS18, RPS19, RPS28, RPS5, RPS6, RPS7, RPS8, RPSA, UTP18]
ribosome biogenesis	32	[EIF4A3, KLHDC3, NOP10, NSUN4, RPL10, RPL10A, RPL11, RPL12, RPL14, RPL24, RPL26, RPL3, RPL35, RPL35A, RPL36, RPL38, RPL5, RPL6, RPL7, RPLP0, RPS15, RPS16, RPS17, RPS18, RPS19, RPS28, RPS5, RPS6, RPS7, RPS8, RPSA, UTP18]
mitochondrial part	32	[ARL2BP, CABS1, CHCHD2, CISD1, CLPP, COX1, COX4I1, COX7A2, COX7A2L, COX7B, CSDE1, FDX1, FUNDC2, GLS, LGALS3, LPIN1, MRPL40, NDUFA5, NDUFB2, NSUN4, POLG2, PRELID2, ROMO1, RPS3, SDHAF3, SDHB, SLC25A3, SLC25A39, SLC25A6, SORD, SPATA18, TFAM]
gamete generation	32	[ADIG, BCL2L11, CABS1, CAPZA3, CTNNB1, CYLC1, CYLC2, H3F3A, HSPA1A, INHBA, KIT, NPM2, OAZ3, ODF1, ODF2, PAFAH1B1, PAIP2, PRM1, PRM2, ROPN1, SOD1, SPATA6, SPEM1, SPIN1, TBATA, TNP1, TNP2, TSSK3, TSSK6, UBE2B, UBE2J1, YBX3]
ribosome biogenesis	32	[EIF4A3, KLHDC3, NOP10, NSUN4, RPL10, RPL10A, RPL11, RPL12, RPL14, RPL24, RPL26, RPL3, RPL35, RPL35A, RPL36, RPL38, RPL5, RPL6, RPL7, RPLP0, RPS15, RPS16, RPS17, RPS18, RPS19, RPS28, RPS5, RPS6, RPS7, RPS8, RPSA, UTP18]
neuron development	32	[BAG5, CAPZB, CFL1, CTNNB1, DLX5, DPYSL2, EFNA1, ELAVL4, FKBP1A, FKBP4, FOXP1, GAP43, GATA3, HAND2, JUN, KIF5C, NKX2-1, NR4A3, NRN1, PAFAH1B1, PAK1, PHGDH, PRRX1, RAB11A, RIMS2, RPL24, SOD1, STMN1, UBA52, UBB, VIM, WNT5A]
supramolecular fiber organization	32	[ACTG1, ACTR3, ARF1, ARPC1A, ARPC2, ARPC4, CAPZA2, CAPZA3, CAPZB, CFL1, EZR, FKBP1A, FOXP1, HSPA1A, KIF2C, MTPN, PAFAH1B1, PAK1, PFN1, PHACTR1, RAB11A, RAC1, RDX, RHOA, RPS3, S100A10, STMN1, TGFB2, TMSB10, TMSB4X, TPM3, VIM]
neuron development	32	[BAG5, CAPZB, CFL1, CTNNB1, DLX5, DPYSL2, EFNA1, ELAVL4, FKBP1A, FKBP4, FOXP1, GAP43, GATA3, HAND2, JUN, KIF5C, NKX2-1, NR4A3, NRN1, PAFAH1B1, PAK1, PHGDH, PRRX1, RAB11A, RIMS2, RPL24, SOD1, STMN1, UBA52, UBB, VIM, WNT5A]
positive regulation of intracellular signal transduction	31	[ARL2BP, CCL14, CD44, CTNNB1, DDX5, EFNA1, FKBP1A, GATA3, GSDME, HAND2, HMGB1, JUN, KIT, LAMTOR4, PAK1, PELI1, PTP4A2, RACK1, RAP1B, RHOA, RPL11, RPL26, RPS3, RPS7, SOD1, TGFB2, UBA52, UBB, UBE2N, UBE2V1, WNT5A]
protein ubiquitination	31	[ARIH1, BAG5, CDC34, DCUN1D1, DCUN1D5, FKBP1A, HSP90AA1, LTN1, MPHOSPH8, PELI1, RACK1, RNF11, RPL11, RPS3, RPS7, SKP1, SOD1, TRIM36, UBA52, UBB, UBE2B, UBE2D2, UBE2F, UBE2J1, UBE2M, UBE2N, UBE2Q1, UBE2R2, UBE2V1, ZNRF1, ZNRF4]
transcription factor binding	31	[ACTB, ANKRD2, ATF4, BHLHE41, CHCHD2, CHD4, CITED2, CNOT7, CTNNB1, DDX5, EIF4E, ELMSAN1, FKBP4, GATA3, HAND2, HDGF, HMGB1, HNRNPU, JUN, LMO4, NACA, NCOR1, NR4A3, PPARGC1A, PTMA, RPS3, RUVBL1, SUMO1, TAF10, TAF12, YWHAZ]
positive regulation of intracellular signal transduction	31	[ARL2BP, CCL14, CD44, CTNNB1, DDX5, EFNA1, FKBP1A, GATA3, GSDME, HAND2, HMGB1, JUN, KIT, LAMTOR4, PAK1, PELI1, PTP4A2, RACK1, RAP1B, RHOA, RPL11, RPL26, RPS3, RPS7, SOD1, TGFB2, UBA52, UBB, UBE2N, UBE2V1, WNT5A]
cell projection part	31	[AK1, ARPC1A, ARPC2, CABYR, CD44, CEP41, CETN1, CFL1, CTNNB1, DPYSL2, EZR, FKBP4, FXR1, GABARAP, GAP43, GPI, HSP90AA1, HSPB1, KIF5C, ODF1, ODF2, PAFAH1B1, PAK1, RAC1, RACK1, RHOA, ROPN1, RPS3, SOD1, SPA17, SPATA6]
plasma membrane bounded cell projection part	31	[AK1, ARPC1A, ARPC2, CABYR, CD44, CEP41, CETN1, CFL1, CTNNB1, DPYSL2, EZR, FKBP4, FXR1, GABARAP, GAP43, GPI, HSP90AA1, HSPB1, KIF5C, ODF1, ODF2, PAFAH1B1, PAK1, RAC1, RACK1, RHOA, ROPN1, RPS3, SOD1, SPA17, SPATA6]
cell projection part	31	[AK1, ARPC1A, ARPC2, CABYR, CD44, CEP41, CETN1, CFL1, CTNNB1, DPYSL2, EZR, FKBP4, FXR1, GABARAP, GAP43, GPI, HSP90AA1, HSPB1, KIF5C, ODF1, ODF2, PAFAH1B1, PAK1, RAC1, RACK1, RHOA, ROPN1, RPS3, SOD1, SPA17, SPATA6]
plasma membrane bounded cell projection part	31	[AK1, ARPC1A, ARPC2, CABYR, CD44, CEP41, CETN1, CFL1, CTNNB1, DPYSL2, EZR, FKBP4, FXR1, GABARAP, GAP43, GPI, HSP90AA1, HSPB1, KIF5C, ODF1, ODF2, PAFAH1B1, PAK1, RAC1, RACK1, RHOA, ROPN1, RPS3, SOD1, SPA17, SPATA6]
positive regulation of intracellular signal transduction	31	[ARL2BP, CCL14, CD44, CTNNB1, DDX5, EFNA1, FKBP1A, GATA3, GSDME, HAND2, HMGB1, JUN, KIT, LAMTOR4, PAK1, PELI1, PTP4A2, RACK1, RAP1B, RHOA, RPL11, RPL26, RPS3, RPS7, SOD1, TGFB2, UBA52, UBB, UBE2N, UBE2V1, WNT5A]
generation of precursor metabolites and energy	31	[ALDH5A1, CISD1, COQ10B, COX1, COX3, COX4I1, COX7A2, COX7A2L, COX7B, ENO1, FBP1, FDX1, GAPDH, GAPDHS, GPI, HMGB1, NCOR1, NDUFA5, NR4A3, PGAM2, PHKG2, PKM, POLG2, PPARGC1A, PPP1CB, PPP1R2, PTGES3, SDHB, SH3BGRL3, SUCLG2, TPI1]
protein ubiquitination	31	[ARIH1, BAG5, CDC34, DCUN1D1, DCUN1D5, FKBP1A, HSP90AA1, LTN1, MPHOSPH8, PELI1, RACK1, RNF11, RPL11, RPS3, RPS7, SKP1, SOD1, TRIM36, UBA52, UBB, UBE2B, UBE2D2, UBE2F, UBE2J1, UBE2M, UBE2N, UBE2Q1, UBE2R2, UBE2V1, ZNRF1, ZNRF4]
transcription factor binding	31	[ACTB, ANKRD2, ATF4, BHLHE41, CHCHD2, CHD4, CITED2, CNOT7, CTNNB1, DDX5, EIF4E, ELMSAN1, FKBP4, GATA3, HAND2, HDGF, HMGB1, HNRNPU, JUN, LMO4, NACA, NCOR1, NR4A3, PPARGC1A, PTMA, RPS3, RUVBL1, SUMO1, TAF10, TAF12, YWHAZ]
transcription factor binding	31	[ACTB, ANKRD2, ATF4, BHLHE41, CHCHD2, CHD4, CITED2, CNOT7, CTNNB1, DDX5, EIF4E, ELMSAN1, FKBP4, GATA3, HAND2, HDGF, HMGB1, HNRNPU, JUN, LMO4, NACA, NCOR1, NR4A3, PPARGC1A, PTMA, RPS3, RUVBL1, SUMO1, TAF10, TAF12, YWHAZ]
regulatory region nucleic acid binding	31	[ACTB, ATF4, BHLHE41, CHD2, CHD4, CREB3L2, CTNNB1, DLX5, ELF5, ELMSAN1, FOXP1, GATA3, H3F3A, HAND2, HNRNPK, HNRNPL, HNRNPU, JUN, LMO4, MEIS1, NKX2-1, NR4A3, PRDX5, PRRX1, RPS3, SLC2A4RG, TFAM, THAP1, WNT5A, YBX1, YBX3]
transcription regulatory region DNA binding	31	[ACTB, ATF4, BHLHE41, CHD2, CHD4, CREB3L2, CTNNB1, DLX5, ELF5, ELMSAN1, FOXP1, GATA3, H3F3A, HAND2, HNRNPK, HNRNPL, HNRNPU, JUN, LMO4, MEIS1, NKX2-1, NR4A3, PRDX5, PRRX1, RPS3, SLC2A4RG, TFAM, THAP1, WNT5A, YBX1, YBX3]
generation of precursor metabolites and energy	31	[ALDH5A1, CISD1, COQ10B, COX1, COX3, COX4I1, COX7A2, COX7A2L, COX7B, ENO1, FBP1, FDX1, GAPDH, GAPDHS, GPI, HMGB1, NCOR1, NDUFA5, NR4A3, PGAM2, PHKG2, PKM, POLG2, PPARGC1A, PPP1CB, PPP1R2, PTGES3, SDHB, SH3BGRL3, SUCLG2, TPI1]
positive regulation of intracellular signal transduction	31	[ARL2BP, CCL14, CD44, CTNNB1, DDX5, EFNA1, FKBP1A, GATA3, GSDME, HAND2, HMGB1, JUN, KIT, LAMTOR4, PAK1, PELI1, PTP4A2, RACK1, RAP1B, RHOA, RPL11, RPL26, RPS3, RPS7, SOD1, TGFB2, UBA52, UBB, UBE2N, UBE2V1, WNT5A]
large ribosomal subunit	31	[MRPL40, NSUN4, RPL10, RPL10A, RPL11, RPL12, RPL13, RPL13A, RPL14, RPL18, RPL19, RPL22, RPL23, RPL24, RPL26, RPL28, RPL29, RPL3, RPL31, RPL35, RPL35A, RPL36, RPL37, RPL37A, RPL38, RPL5, RPL6, RPL7, RPL8, RPLP0, RPLP1]
protein ubiquitination	31	[ARIH1, BAG5, CDC34, DCUN1D1, DCUN1D5, FKBP1A, HSP90AA1, LTN1, MPHOSPH8, PELI1, RACK1, RNF11, RPL11, RPS3, RPS7, SKP1, SOD1, TRIM36, UBA52, UBB, UBE2B, UBE2D2, UBE2F, UBE2J1, UBE2M, UBE2N, UBE2Q1, UBE2R2, UBE2V1, ZNRF1, ZNRF4]
regulation of cell cycle	31	[AK1, BCL2L11, CCNI, CCNY, CHMP5, CITED2, CTNNB1, EIF4E, GATA3, HNRNPU, HSPA1A, INHBA, IRF6, JUN, NPM2, NR4A3, PAK1, PSME1, RAB11A, RACK1, RAD21, RDX, RHOA, RPL24, RPL26, SLF1, TGFB2, THAP1, TRIM36, UBE2B, WNT5A]
positive regulation of intracellular signal transduction	31	[ARL2BP, CCL14, CD44, CTNNB1, DDX5, EFNA1, FKBP1A, GATA3, GSDME, HAND2, HMGB1, JUN, KIT, LAMTOR4, PAK1, PELI1, PTP4A2, RACK1, RAP1B, RHOA, RPL11, RPL26, RPS3, RPS7, SOD1, TGFB2, UBA52, UBB, UBE2N, UBE2V1, WNT5A]
protein ubiquitination	31	[ARIH1, BAG5, CDC34, DCUN1D1, DCUN1D5, FKBP1A, HSP90AA1, LTN1, MPHOSPH8, PELI1, RACK1, RNF11, RPL11, RPS3, RPS7, SKP1, SOD1, TRIM36, UBA52, UBB, UBE2B, UBE2D2, UBE2F, UBE2J1, UBE2M, UBE2N, UBE2Q1, UBE2R2, UBE2V1, ZNRF1, ZNRF4]
neuron projection development	31	[BAG5, CAPZB, CFL1, CTNNB1, DLX5, DPYSL2, EFNA1, ELAVL4, FKBP1A, FKBP4, FOXP1, GAP43, GATA3, JUN, KIF5C, NKX2-1, NR4A3, NRN1, PAFAH1B1, PAK1, PHGDH, PRRX1, RAB11A, RIMS2, RPL24, SOD1, STMN1, UBA52, UBB, VIM, WNT5A]
organic acid metabolic process	31	[ACSBG2, AHCYL2, ALDH5A1, CD44, ENO1, FBP1, FDXACB1, GAPDH, GAPDHS, GLS, GLUL, GPI, GSTO2, HAS2, INSIG2, LDHB, LPIN1, LYPLA1, NCOR1, NR4A3, PDHA2, PGAM2, PHGDH, PKM, POLG2, PPARGC1A, PTGES3, SDHAF3, SDHB, SUCLG2, TPI1]
generation of precursor metabolites and energy	31	[ALDH5A1, CISD1, COQ10B, COX1, COX3, COX4I1, COX7A2, COX7A2L, COX7B, ENO1, FBP1, FDX1, GAPDH, GAPDHS, GPI, HMGB1, NCOR1, NDUFA5, NR4A3, PGAM2, PHKG2, PKM, POLG2, PPARGC1A, PPP1CB, PPP1R2, PTGES3, SDHB, SH3BGRL3, SUCLG2, TPI1]
oxoacid metabolic process	31	[ACSBG2, AHCYL2, ALDH5A1, CD44, ENO1, FBP1, FDXACB1, GAPDH, GAPDHS, GLS, GLUL, GPI, GSTO2, HAS2, INSIG2, LDHB, LPIN1, LYPLA1, NCOR1, NR4A3, PDHA2, PGAM2, PHGDH, PKM, POLG2, PPARGC1A, PTGES3, SDHAF3, SDHB, SUCLG2, TPI1]
carboxylic acid metabolic process	31	[ACSBG2, AHCYL2, ALDH5A1, CD44, ENO1, FBP1, FDXACB1, GAPDH, GAPDHS, GLS, GLUL, GPI, GSTO2, HAS2, INSIG2, LDHB, LPIN1, LYPLA1, NCOR1, NR4A3, PDHA2, PGAM2, PHGDH, PKM, POLG2, PPARGC1A, PTGES3, SDHAF3, SDHB, SUCLG2, TPI1]
cell projection part	31	[AK1, ARPC1A, ARPC2, CABYR, CD44, CEP41, CETN1, CFL1, CTNNB1, DPYSL2, EZR, FKBP4, FXR1, GABARAP, GAP43, GPI, HSP90AA1, HSPB1, KIF5C, ODF1, ODF2, PAFAH1B1, PAK1, RAC1, RACK1, RHOA, ROPN1, RPS3, SOD1, SPA17, SPATA6]
plasma membrane bounded cell projection part	31	[AK1, ARPC1A, ARPC2, CABYR, CD44, CEP41, CETN1, CFL1, CTNNB1, DPYSL2, EZR, FKBP4, FXR1, GABARAP, GAP43, GPI, HSP90AA1, HSPB1, KIF5C, ODF1, ODF2, PAFAH1B1, PAK1, RAC1, RACK1, RHOA, ROPN1, RPS3, SOD1, SPA17, SPATA6]
positive regulation of organelle organization	31	[ACTR3, APOPT1, ARF1, ARPC1A, ARPC2, ARPC4, ATL3, BCL2L11, CFL1, CTNNB1, GATA3, HNRNPU, HSPA1A, HSPA1L, MLLT11, NPM2, PAK1, PFN1, PPARGC1A, RAC1, RAD21, RHOA, RPS3, RTF1, RUVBL1, S100A10, SLF1, UBE2B, UBE2N, UBL4B, WNT5A]
positive regulation of intracellular signal transduction	31	[ARL2BP, CCL14, CD44, CTNNB1, DDX5, EFNA1, FKBP1A, GATA3, GSDME, HAND2, HMGB1, JUN, KIT, LAMTOR4, PAK1, PELI1, PTP4A2, RACK1, RAP1B, RHOA, RPL11, RPL26, RPS3, RPS7, SOD1, TGFB2, UBA52, UBB, UBE2N, UBE2V1, WNT5A]
chromatin	30	[ACTB, ANKRD2, CHD4, CITED2, CTNNB1, DLX5, GATA3, H2AFJ, H3F3A, HAND2, HILS1, HIST1H2BD, HMGB1, HMGN1, HNRNPK, JUN, KIF22, KLHDC3, MPHOSPH8, NCOR1, NPM2, PRM1, PRM2, RAD21, RUVBL1, SLF1, SWI5, TNP1, TNP2, UBE2B]
chromatin	30	[ACTB, ANKRD2, CHD4, CITED2, CTNNB1, DLX5, GATA3, H2AFJ, H3F3A, HAND2, HILS1, HIST1H2BD, HMGB1, HMGN1, HNRNPK, JUN, KIF22, KLHDC3, MPHOSPH8, NCOR1, NPM2, PRM1, PRM2, RAD21, RUVBL1, SLF1, SWI5, TNP1, TNP2, UBE2B]
double-stranded DNA binding	30	[ACTB, ATF4, BHLHE41, CHD2, CHD4, CREB3L2, CTNNB1, DLX5, ELF5, FOXP1, GATA3, H3F3A, HAND2, HMGB1, HMGB3, HNRNPK, HNRNPU, JUN, LMO4, LSM14A, MEIS1, NKX2-1, NR4A3, PRRX1, RPS3, SLC2A4RG, TFAM, THAP1, YBX1, YBX3]
double-stranded DNA binding	30	[ACTB, ATF4, BHLHE41, CHD2, CHD4, CREB3L2, CTNNB1, DLX5, ELF5, FOXP1, GATA3, H3F3A, HAND2, HMGB1, HMGB3, HNRNPK, HNRNPU, JUN, LMO4, LSM14A, MEIS1, NKX2-1, NR4A3, PRRX1, RPS3, SLC2A4RG, TFAM, THAP1, YBX1, YBX3]
chromatin	30	[ACTB, ANKRD2, CHD4, CITED2, CTNNB1, DLX5, GATA3, H2AFJ, H3F3A, HAND2, HILS1, HIST1H2BD, HMGB1, HMGN1, HNRNPK, JUN, KIF22, KLHDC3, MPHOSPH8, NCOR1, NPM2, PRM1, PRM2, RAD21, RUVBL1, SLF1, SWI5, TNP1, TNP2, UBE2B]
proteolysis involved in cellular protein catabolic process	30	[ADRM1, ARIH1, BAG5, CDC34, CLPP, EFNA1, FBXO8, GET4, MGC137055, PSME1, PSMF1, RACK1, RNF11, RPL11, RPS7, SEC61B, SKP1, SOD1, SUMO1, UBA52, UBB, UBE2B, UBE2J1, UBE2N, UBE2R2, UBXN11, UBXN4, UBXN6, ZNRF1, ZNRF4]
double-stranded DNA binding	30	[ACTB, ATF4, BHLHE41, CHD2, CHD4, CREB3L2, CTNNB1, DLX5, ELF5, FOXP1, GATA3, H3F3A, HAND2, HMGB1, HMGB3, HNRNPK, HNRNPU, JUN, LMO4, LSM14A, MEIS1, NKX2-1, NR4A3, PRRX1, RPS3, SLC2A4RG, TFAM, THAP1, YBX1, YBX3]
actin cytoskeleton organization	30	[ACTB, ACTG1, ACTR3, ARF1, ARPC1A, ARPC2, ARPC4, CAPZA2, CAPZA3, CAPZB, CFL1, EZR, FOXP1, KIT, LIMCH1, MTPN, MYL12A, PAFAH1B1, PAK1, PFN1, PHACTR1, PHPT1, RAC1, RDX, RHOA, S100A10, STMN1, TMSB10, TMSB4X, TPM3]
protein domain specific binding	29	[ARF1, ATF4, ATP2B1, CABYR, CTNNB1, DAZAP2, DDX5, DLX5, EZR, GAPDH, GATA3, HNRNPK, HSP90AA1, HSPA1A, KHDRBS3, LAMP1, OSTF1, PABPN1, PRRX1, RACK1, RDX, SRSF9, TCEAL8, TRA2B, WBP2NL, WNT5A, YWHAE, YWHAQ, YWHAZ]
cytosolic large ribosomal subunit	29	[RPL10, RPL10A, RPL11, RPL12, RPL13, RPL13A, RPL14, RPL18, RPL19, RPL22, RPL23, RPL24, RPL26, RPL28, RPL29, RPL3, RPL31, RPL35, RPL35A, RPL36, RPL37, RPL37A, RPL38, RPL5, RPL6, RPL7, RPL8, RPLP0, RPLP1]
polymeric cytoskeletal fiber	29	[ACTG1, AK1, CAPZB, DPYSL2, DYNLL1, DYNLL2, EZR, FKBP4, GABARAP, HNRNPU, KIF22, KIF2C, KIF5C, KRT24, LMNB2, MAP1LC3A, NCOR1, ODF1, ODF2, PAFAH1B1, POLB, RAB11A, RAC1, SERP1, STMN1, TEKT1, TPM3, TUBB4B, VIM]
regulation of catabolic process	29	[ARIH1, BAG5, CNOT7, DEDD, EFNA1, EZR, FBP1, HMGB1, HNRNPU, MGC137055, NCOR1, OAZ1, OAZ3, PABPC1, PGAM2, PSME1, PSMF1, RACK1, RDX, RPL11, RPS7, RUVBL1, SUMO1, SYNCRIP, UBA52, UBB, UBE2J1, WNT5A, YBX1]
polymeric cytoskeletal fiber	29	[ACTG1, AK1, CAPZB, DPYSL2, DYNLL1, DYNLL2, EZR, FKBP4, GABARAP, HNRNPU, KIF22, KIF2C, KIF5C, KRT24, LMNB2, MAP1LC3A, NCOR1, ODF1, ODF2, PAFAH1B1, POLB, RAB11A, RAC1, SERP1, STMN1, TEKT1, TPM3, TUBB4B, VIM]
regulation of catabolic process	29	[ARIH1, BAG5, CNOT7, DEDD, EFNA1, EZR, FBP1, HMGB1, HNRNPU, MGC137055, NCOR1, OAZ1, OAZ3, PABPC1, PGAM2, PSME1, PSMF1, RACK1, RDX, RPL11, RPS7, RUVBL1, SUMO1, SYNCRIP, UBA52, UBB, UBE2J1, WNT5A, YBX1]
polymeric cytoskeletal fiber	29	[ACTG1, AK1, CAPZB, DPYSL2, DYNLL1, DYNLL2, EZR, FKBP4, GABARAP, HNRNPU, KIF22, KIF2C, KIF5C, KRT24, LMNB2, MAP1LC3A, NCOR1, ODF1, ODF2, PAFAH1B1, POLB, RAB11A, RAC1, SERP1, STMN1, TEKT1, TPM3, TUBB4B, VIM]
cytosolic large ribosomal subunit	29	[RPL10, RPL10A, RPL11, RPL12, RPL13, RPL13A, RPL14, RPL18, RPL19, RPL22, RPL23, RPL24, RPL26, RPL28, RPL29, RPL3, RPL31, RPL35, RPL35A, RPL36, RPL37, RPL37A, RPL38, RPL5, RPL6, RPL7, RPL8, RPLP0, RPLP1]
regulation of catabolic process	29	[ARIH1, BAG5, CNOT7, DEDD, EFNA1, EZR, FBP1, HMGB1, HNRNPU, MGC137055, NCOR1, OAZ1, OAZ3, PABPC1, PGAM2, PSME1, PSMF1, RACK1, RDX, RPL11, RPS7, RUVBL1, SUMO1, SYNCRIP, UBA52, UBB, UBE2J1, WNT5A, YBX1]
polymeric cytoskeletal fiber	29	[ACTG1, AK1, CAPZB, DPYSL2, DYNLL1, DYNLL2, EZR, FKBP4, GABARAP, HNRNPU, KIF22, KIF2C, KIF5C, KRT24, LMNB2, MAP1LC3A, NCOR1, ODF1, ODF2, PAFAH1B1, POLB, RAB11A, RAC1, SERP1, STMN1, TEKT1, TPM3, TUBB4B, VIM]
cellular protein complex assembly	29	[ACTR3, ADRM1, ARF1, ARPC1A, ARPC2, ARPC4, CAPZA2, CAPZA3, CAPZB, CLTA, COX3, COX7A2L, FKBP1A, FKBP4, HSP90AA1, HSPA1A, MTPN, NDUFA5, NDUFB2, PAK1, PFN1, RAC1, RDX, RPS3, SDHAF3, STMN1, TAF10, TFAM, VPS41]
protein complex binding	28	[ACTR3, ADRM1, ARPC1A, ARPC2, ARPC4, BCL2L11, BICD2, CAPZB, CETN1, CFL1, EZR, FKBP1A, HNRNPU, HSP90AA1, LGALS3, MYL12A, PAFAH1B1, PAK1, PSMF1, RAD21, RAP1B, RPS3, RTF1, SLC25A3, SLF1, TPM3, VIM, YWHAE]
nuclear body	28	[ANKRD2, ARIH1, CDC34, CHD5, CNOT7, CWC25, DAZAP2, EIF3E, EIF4A3, GPATCH2, HABP4, HNRNPU, KIF22, LPXN, NOP10, PABPN1, PCBP1, PHF7, POLR2D, PPARGC1A, RETREG1, S100A14, SLC2A4RG, SLU7, SRSF3, SUMO1, SUMO2, THAP1]
transferase complex	28	[ACTB, ARIH1, C26H10orf120, CCNY, DCAF12, DCAF5, DCUN1D1, DCUN1D5, DPM3, FBXO8, GTF2F2, MAT2A, MORF4L1, MPHOSPH8, PHKG2, POLR2D, PYURF, RNF11, RTF1, RUVBL1, SKP1, TAF10, TAF12, TMEM258, UBE2B, UBE2D2, UBE2N, UBE2V1]
regulation of anatomical structure morphogenesis	28	[ARPC2, BTG1, CAPZB, CD44, CFL1, CITED2, CSNK1G2, CTNNB1, DPYSL2, EFNA1, EZR, GATA3, HAND2, HMGB1, HSPB1, KIT, OSR1, PAFAH1B1, PAK1, RAB11A, RAC1, RACK1, RDX, RHOA, RIMS2, S100A10, VRK3, WNT5A]
apoptotic signaling pathway	28	[ANKRD2, APOPT1, ATF4, BAG5, BCL2L11, CD44, CTNNB1, DDX5, DEDD, GABARAP, GSDME, HNRNPK, HSPB1, INHBA, LAMP1, LGALS3, MLLT11, POLB, RACK1, RPL11, RPL26, RPS3, RPS7, TGFB2, TNFRSF21, UBA52, UBB, YBX3]
neuron projection	28	[AHCYL2, ARF1, ARPC2, ATF4, CAMK2D, CETN1, DPYSL2, FKBP4, FXR1, GAP43, HMGB1, HSPB1, KCNA4, KIF5C, MTPN, PAFAH1B1, RAB11A, RAC1, RACK1, RDX, REEP6, RHOA, SOD1, STMN1, TNFRSF21, UBA52, UBB, VIM]
regulation of anatomical structure morphogenesis	28	[ARPC2, BTG1, CAPZB, CD44, CFL1, CITED2, CSNK1G2, CTNNB1, DPYSL2, EFNA1, EZR, GATA3, HAND2, HMGB1, HSPB1, KIT, OSR1, PAFAH1B1, PAK1, RAB11A, RAC1, RACK1, RDX, RHOA, RIMS2, S100A10, VRK3, WNT5A]
regulation of anatomical structure morphogenesis	28	[ARPC2, BTG1, CAPZB, CD44, CFL1, CITED2, CSNK1G2, CTNNB1, DPYSL2, EFNA1, EZR, GATA3, HAND2, HMGB1, HSPB1, KIT, OSR1, PAFAH1B1, PAK1, RAB11A, RAC1, RACK1, RDX, RHOA, RIMS2, S100A10, VRK3, WNT5A]
regulation of anatomical structure morphogenesis	28	[ARPC2, BTG1, CAPZB, CD44, CFL1, CITED2, CSNK1G2, CTNNB1, DPYSL2, EFNA1, EZR, GATA3, HAND2, HMGB1, HSPB1, KIT, OSR1, PAFAH1B1, PAK1, RAB11A, RAC1, RACK1, RDX, RHOA, RIMS2, S100A10, VRK3, WNT5A]
male gamete generation	28	[ADIG, BCL2L11, CABS1, CAPZA3, CYLC1, CYLC2, H3F3A, HSPA1A, KIT, OAZ3, ODF1, ODF2, PAFAH1B1, PAIP2, PRM1, PRM2, ROPN1, SOD1, SPATA6, SPEM1, TBATA, TNP1, TNP2, TSSK3, TSSK6, UBE2B, UBE2J1, YBX3]
spermatogenesis	28	[ADIG, BCL2L11, CABS1, CAPZA3, CYLC1, CYLC2, H3F3A, HSPA1A, KIT, OAZ3, ODF1, ODF2, PAFAH1B1, PAIP2, PRM1, PRM2, ROPN1, SOD1, SPATA6, SPEM1, TBATA, TNP1, TNP2, TSSK3, TSSK6, UBE2B, UBE2J1, YBX3]
apoptotic signaling pathway	28	[ANKRD2, APOPT1, ATF4, BAG5, BCL2L11, CD44, CTNNB1, DDX5, DEDD, GABARAP, GSDME, HNRNPK, HSPB1, INHBA, LAMP1, LGALS3, MLLT11, POLB, RACK1, RPL11, RPL26, RPS3, RPS7, TGFB2, TNFRSF21, UBA52, UBB, YBX3]
regulation of anatomical structure morphogenesis	28	[ARPC2, BTG1, CAPZB, CD44, CFL1, CITED2, CSNK1G2, CTNNB1, DPYSL2, EFNA1, EZR, GATA3, HAND2, HMGB1, HSPB1, KIT, OSR1, PAFAH1B1, PAK1, RAB11A, RAC1, RACK1, RDX, RHOA, RIMS2, S100A10, VRK3, WNT5A]
regulation of anatomical structure morphogenesis	28	[ARPC2, BTG1, CAPZB, CD44, CFL1, CITED2, CSNK1G2, CTNNB1, DPYSL2, EFNA1, EZR, GATA3, HAND2, HMGB1, HSPB1, KIT, OSR1, PAFAH1B1, PAK1, RAB11A, RAC1, RACK1, RDX, RHOA, RIMS2, S100A10, VRK3, WNT5A]
protein complex binding	28	[ACTR3, ADRM1, ARPC1A, ARPC2, ARPC4, BCL2L11, BICD2, CAPZB, CETN1, CFL1, EZR, FKBP1A, HNRNPU, HSP90AA1, LGALS3, MYL12A, PAFAH1B1, PAK1, PSMF1, RAD21, RAP1B, RPS3, RTF1, SLC25A3, SLF1, TPM3, VIM, YWHAE]
regulation of anatomical structure morphogenesis	28	[ARPC2, BTG1, CAPZB, CD44, CFL1, CITED2, CSNK1G2, CTNNB1, DPYSL2, EFNA1, EZR, GATA3, HAND2, HMGB1, HSPB1, KIT, OSR1, PAFAH1B1, PAK1, RAB11A, RAC1, RACK1, RDX, RHOA, RIMS2, S100A10, VRK3, WNT5A]
regulation of anatomical structure morphogenesis	28	[ARPC2, BTG1, CAPZB, CD44, CFL1, CITED2, CSNK1G2, CTNNB1, DPYSL2, EFNA1, EZR, GATA3, HAND2, HMGB1, HSPB1, KIT, OSR1, PAFAH1B1, PAK1, RAB11A, RAC1, RACK1, RDX, RHOA, RIMS2, S100A10, VRK3, WNT5A]
regulation of cellular amide metabolic process	27	[CNOT7, DDX5, EFNA1, EIF3E, EIF4A3, EIF4E, EIF4G2, EIF5, EIF5A, FXR1, GAPDH, HABP4, LSM14A, NCOR1, NSUN4, PAIP2, PGAM2, POLR2D, RACK1, RPL10, RPL13A, RPL26, RPL38, RPS3, RPS9, SERP1, SYNCRIP]
posttranscriptional regulation of gene expression	27	[CNOT7, DDX5, EIF3E, EIF4A3, EIF4E, EIF4G2, EIF5, EIF5A, FXR1, GAPDH, HABP4, HNRNPU, LSM14A, NCOR1, NSUN4, PAIP2, POLR2D, RACK1, RPL10, RPL13A, RPL26, RPL38, RPS3, RPS9, SERP1, SYNCRIP, YBX1]
negative regulation of developmental process	27	[ANKRD2, BAG5, BHLHE41, CDH3, CTNNB1, EFNA1, EIF4E, ELF5, FKBP4, FOXP1, GATA3, GPS2, HAND2, HMGB1, HNRNPU, INHBA, LBH, MEIS1, NKX2-1, OSR1, RHOA, TCTA, TNFRSF21, VIM, WNT5A, YBX1, YBX3]
regulation of cellular response to stress	27	[ATF4, BAG5, CD44, CHCHD2, CTNNB1, DDX5, EZR, FKBP1A, GPS2, HAND2, HMGB1, HNRNPK, HSPB1, NCOR1, NR4A3, PAFAH1B1, PAK1, PRRX1, RACK1, RPL26, RPS3, SLF1, TGFB2, UBE2J1, UBE2N, WNT5A, YBX3]
negative regulation of developmental process	27	[ANKRD2, BAG5, BHLHE41, CDH3, CTNNB1, EFNA1, EIF4E, ELF5, FKBP4, FOXP1, GATA3, GPS2, HAND2, HMGB1, HNRNPU, INHBA, LBH, MEIS1, NKX2-1, OSR1, RHOA, TCTA, TNFRSF21, VIM, WNT5A, YBX1, YBX3]
negative regulation of transcription from RNA polymerase II promoter	27	[ANKRD2, BHLHE41, CNOT7, CTNNB1, DDX5, DNAJB1, EFNA1, EZR, FBP1, FOXP1, GATA3, GPS2, HDGF, HMGB1, HNRNPU, HSPA1A, JUN, NCOR1, NKX2-1, NR4A3, OSR1, PKIG, PRRX1, RTF1, THAP1, YBX1, YBX3]
regulation of cellular response to stress	27	[ATF4, BAG5, CD44, CHCHD2, CTNNB1, DDX5, EZR, FKBP1A, GPS2, HAND2, HMGB1, HNRNPK, HSPB1, NCOR1, NR4A3, PAFAH1B1, PAK1, PRRX1, RACK1, RPL26, RPS3, SLF1, TGFB2, UBE2J1, UBE2N, WNT5A, YBX3]
negative regulation of transcription from RNA polymerase II promoter	27	[ANKRD2, BHLHE41, CNOT7, CTNNB1, DDX5, DNAJB1, EFNA1, EZR, FBP1, FOXP1, GATA3, GPS2, HDGF, HMGB1, HNRNPU, HSPA1A, JUN, NCOR1, NKX2-1, NR4A3, OSR1, PKIG, PRRX1, RTF1, THAP1, YBX1, YBX3]
regulation of cellular amide metabolic process	27	[CNOT7, DDX5, EFNA1, EIF3E, EIF4A3, EIF4E, EIF4G2, EIF5, EIF5A, FXR1, GAPDH, HABP4, LSM14A, NCOR1, NSUN4, PAIP2, PGAM2, POLR2D, RACK1, RPL10, RPL13A, RPL26, RPL38, RPS3, RPS9, SERP1, SYNCRIP]
posttranscriptional regulation of gene expression	27	[CNOT7, DDX5, EIF3E, EIF4A3, EIF4E, EIF4G2, EIF5, EIF5A, FXR1, GAPDH, HABP4, HNRNPU, LSM14A, NCOR1, NSUN4, PAIP2, POLR2D, RACK1, RPL10, RPL13A, RPL26, RPL38, RPS3, RPS9, SERP1, SYNCRIP, YBX1]
regulation of cellular amide metabolic process	27	[CNOT7, DDX5, EFNA1, EIF3E, EIF4A3, EIF4E, EIF4G2, EIF5, EIF5A, FXR1, GAPDH, HABP4, LSM14A, NCOR1, NSUN4, PAIP2, PGAM2, POLR2D, RACK1, RPL10, RPL13A, RPL26, RPL38, RPS3, RPS9, SERP1, SYNCRIP]
posttranscriptional regulation of gene expression	27	[CNOT7, DDX5, EIF3E, EIF4A3, EIF4E, EIF4G2, EIF5, EIF5A, FXR1, GAPDH, HABP4, HNRNPU, LSM14A, NCOR1, NSUN4, PAIP2, POLR2D, RACK1, RPL10, RPL13A, RPL26, RPL38, RPS3, RPS9, SERP1, SYNCRIP, YBX1]
regulation of cellular amide metabolic process	27	[CNOT7, DDX5, EFNA1, EIF3E, EIF4A3, EIF4E, EIF4G2, EIF5, EIF5A, FXR1, GAPDH, HABP4, LSM14A, NCOR1, NSUN4, PAIP2, PGAM2, POLR2D, RACK1, RPL10, RPL13A, RPL26, RPL38, RPS3, RPS9, SERP1, SYNCRIP]
posttranscriptional regulation of gene expression	27	[CNOT7, DDX5, EIF3E, EIF4A3, EIF4E, EIF4G2, EIF5, EIF5A, FXR1, GAPDH, HABP4, HNRNPU, LSM14A, NCOR1, NSUN4, PAIP2, POLR2D, RACK1, RPL10, RPL13A, RPL26, RPL38, RPS3, RPS9, SERP1, SYNCRIP, YBX1]
negative regulation of developmental process	27	[ANKRD2, BAG5, BHLHE41, CDH3, CTNNB1, EFNA1, EIF4E, ELF5, FKBP4, FOXP1, GATA3, GPS2, HAND2, HMGB1, HNRNPU, INHBA, LBH, MEIS1, NKX2-1, OSR1, RHOA, TCTA, TNFRSF21, VIM, WNT5A, YBX1, YBX3]
sequence-specific double-stranded DNA binding	27	[ACTB, ATF4, BHLHE41, CHD2, CHD4, CREB3L2, CTNNB1, DLX5, ELF5, FOXP1, GATA3, H3F3A, HAND2, HNRNPK, HNRNPU, JUN, LMO4, MEIS1, NKX2-1, NR4A3, PRRX1, RPS3, SLC2A4RG, TFAM, THAP1, YBX1, YBX3]
negative regulation of transcription from RNA polymerase II promoter	27	[ANKRD2, BHLHE41, CNOT7, CTNNB1, DDX5, DNAJB1, EFNA1, EZR, FBP1, FOXP1, GATA3, GPS2, HDGF, HMGB1, HNRNPU, HSPA1A, JUN, NCOR1, NKX2-1, NR4A3, OSR1, PKIG, PRRX1, RTF1, THAP1, YBX1, YBX3]
sequence-specific double-stranded DNA binding	27	[ACTB, ATF4, BHLHE41, CHD2, CHD4, CREB3L2, CTNNB1, DLX5, ELF5, FOXP1, GATA3, H3F3A, HAND2, HNRNPK, HNRNPU, JUN, LMO4, MEIS1, NKX2-1, NR4A3, PRRX1, RPS3, SLC2A4RG, TFAM, THAP1, YBX1, YBX3]
negative regulation of transcription from RNA polymerase II promoter	27	[ANKRD2, BHLHE41, CNOT7, CTNNB1, DDX5, DNAJB1, EFNA1, EZR, FBP1, FOXP1, GATA3, GPS2, HDGF, HMGB1, HNRNPU, HSPA1A, JUN, NCOR1, NKX2-1, NR4A3, OSR1, PKIG, PRRX1, RTF1, THAP1, YBX1, YBX3]
negative regulation of developmental process	27	[ANKRD2, BAG5, BHLHE41, CDH3, CTNNB1, EFNA1, EIF4E, ELF5, FKBP4, FOXP1, GATA3, GPS2, HAND2, HMGB1, HNRNPU, INHBA, LBH, MEIS1, NKX2-1, OSR1, RHOA, TCTA, TNFRSF21, VIM, WNT5A, YBX1, YBX3]
regulation of cellular response to stress	27	[ATF4, BAG5, CD44, CHCHD2, CTNNB1, DDX5, EZR, FKBP1A, GPS2, HAND2, HMGB1, HNRNPK, HSPB1, NCOR1, NR4A3, PAFAH1B1, PAK1, PRRX1, RACK1, RPL26, RPS3, SLF1, TGFB2, UBE2J1, UBE2N, WNT5A, YBX3]
regulation of cellular amide metabolic process	27	[CNOT7, DDX5, EFNA1, EIF3E, EIF4A3, EIF4E, EIF4G2, EIF5, EIF5A, FXR1, GAPDH, HABP4, LSM14A, NCOR1, NSUN4, PAIP2, PGAM2, POLR2D, RACK1, RPL10, RPL13A, RPL26, RPL38, RPS3, RPS9, SERP1, SYNCRIP]
posttranscriptional regulation of gene expression	27	[CNOT7, DDX5, EIF3E, EIF4A3, EIF4E, EIF4G2, EIF5, EIF5A, FXR1, GAPDH, HABP4, HNRNPU, LSM14A, NCOR1, NSUN4, PAIP2, POLR2D, RACK1, RPL10, RPL13A, RPL26, RPL38, RPS3, RPS9, SERP1, SYNCRIP, YBX1]
posttranscriptional regulation of gene expression	27	[CNOT7, DDX5, EIF3E, EIF4A3, EIF4E, EIF4G2, EIF5, EIF5A, FXR1, GAPDH, HABP4, HNRNPU, LSM14A, NCOR1, NSUN4, PAIP2, POLR2D, RACK1, RPL10, RPL13A, RPL26, RPL38, RPS3, RPS9, SERP1, SYNCRIP, YBX1]
sequence-specific double-stranded DNA binding	27	[ACTB, ATF4, BHLHE41, CHD2, CHD4, CREB3L2, CTNNB1, DLX5, ELF5, FOXP1, GATA3, H3F3A, HAND2, HNRNPK, HNRNPU, JUN, LMO4, MEIS1, NKX2-1, NR4A3, PRRX1, RPS3, SLC2A4RG, TFAM, THAP1, YBX1, YBX3]
mitotic cell cycle	27	[ARF1, CCNY, CFL1, CHMP5, CTNNB1, EIF4E, HNRNPU, HSPA1A, INHBA, KIF22, KIF2C, NPM2, PAFAH1B1, PAK1, PCNT, PSME1, RAB11A, RAD21, RDX, RHOA, RPL24, RPL26, SLF1, STMN1, TAF10, THAP1, TRIM36]
regulation of cytoskeleton organization	27	[ACTR3, ARF1, ARPC1A, ARPC2, ARPC4, BICD2, CAPZA2, CAPZA3, CAPZB, CFL1, CHMP5, CTNNB1, FKBP4, HNRNPU, HSPA1A, MTPN, PAFAH1B1, PAK1, PFN1, PHPT1, RAC1, RDX, RHOA, RPS3, S100A10, STMN1, TRIM36]
regulation of cellular response to stress	27	[ATF4, BAG5, CD44, CHCHD2, CTNNB1, DDX5, EZR, FKBP1A, GPS2, HAND2, HMGB1, HNRNPK, HSPB1, NCOR1, NR4A3, PAFAH1B1, PAK1, PRRX1, RACK1, RPL26, RPS3, SLF1, TGFB2, UBE2J1, UBE2N, WNT5A, YBX3]
negative regulation of developmental process	27	[ANKRD2, BAG5, BHLHE41, CDH3, CTNNB1, EFNA1, EIF4E, ELF5, FKBP4, FOXP1, GATA3, GPS2, HAND2, HMGB1, HNRNPU, INHBA, LBH, MEIS1, NKX2-1, OSR1, RHOA, TCTA, TNFRSF21, VIM, WNT5A, YBX1, YBX3]
drug metabolic process	27	[AHCYL2, AK1, ALDH5A1, ALLC, COX1, COX4I1, COX7A2L, ENO1, FBP1, GAPDH, GAPDHS, GPI, HSP90AA1, MAT2A, NCOR1, PAFAH1B1, PGAM2, PHGDH, PKM, PPARGC1A, QDPR, SAT1, SDHAF3, SOD1, SRD5A1, THTPA, TPI1]
mitotic cell cycle	27	[ARF1, CCNY, CFL1, CHMP5, CTNNB1, EIF4E, HNRNPU, HSPA1A, INHBA, KIF22, KIF2C, NPM2, PAFAH1B1, PAK1, PCNT, PSME1, RAB11A, RAD21, RDX, RHOA, RPL24, RPL26, SLF1, STMN1, TAF10, THAP1, TRIM36]
regulation of cytoskeleton organization	27	[ACTR3, ARF1, ARPC1A, ARPC2, ARPC4, BICD2, CAPZA2, CAPZA3, CAPZB, CFL1, CHMP5, CTNNB1, FKBP4, HNRNPU, HSPA1A, MTPN, PAFAH1B1, PAK1, PFN1, PHPT1, RAC1, RDX, RHOA, RPS3, S100A10, STMN1, TRIM36]
transcription regulatory region sequence-specific DNA binding	26	[ACTB, ATF4, BHLHE41, CHD2, CHD4, CREB3L2, CTNNB1, DLX5, ELF5, FOXP1, GATA3, H3F3A, HAND2, HNRNPK, JUN, LMO4, MEIS1, NKX2-1, NR4A3, PRRX1, RPS3, SLC2A4RG, TFAM, THAP1, YBX1, YBX3]
ncRNA metabolic process	26	[CDKAL1, DEDD, EIF4A3, ELP5, FDXACB1, KLHDC3, NOP10, NSUN4, POLG2, RPL10A, RPL11, RPL14, RPL26, RPL35, RPL36, RPL7, RPS16, RPS17, RPS28, RPS6, RPS7, RPS8, RPSA, SPIN1, THUMPD1, UTP18]
ncRNA metabolic process	26	[CDKAL1, DEDD, EIF4A3, ELP5, FDXACB1, KLHDC3, NOP10, NSUN4, POLG2, RPL10A, RPL11, RPL14, RPL26, RPL35, RPL36, RPL7, RPS16, RPS17, RPS28, RPS6, RPS7, RPS8, RPSA, SPIN1, THUMPD1, UTP18]
transcription regulatory region sequence-specific DNA binding	26	[ACTB, ATF4, BHLHE41, CHD2, CHD4, CREB3L2, CTNNB1, DLX5, ELF5, FOXP1, GATA3, H3F3A, HAND2, HNRNPK, JUN, LMO4, MEIS1, NKX2-1, NR4A3, PRRX1, RPS3, SLC2A4RG, TFAM, THAP1, YBX1, YBX3]
developmental process involved in reproduction	26	[BCL2L11, CAPZA3, CITED2, CTNNB1, DEDD, FKBP4, GATA3, H3F3A, INHBA, KIT, NKX2-1, NPM2, OSR1, PAFAH1B1, PRM2, ROPN1, SOD1, SPEM1, SRD5A1, TNP1, TNP2, TSSK6, UBE2B, UBE2J1, WNT5A, YBX3]
ncRNA metabolic process	26	[CDKAL1, DEDD, EIF4A3, ELP5, FDXACB1, KLHDC3, NOP10, NSUN4, POLG2, RPL10A, RPL11, RPL14, RPL26, RPL35, RPL36, RPL7, RPS16, RPS17, RPS28, RPS6, RPS7, RPS8, RPSA, SPIN1, THUMPD1, UTP18]
developmental process involved in reproduction	26	[BCL2L11, CAPZA3, CITED2, CTNNB1, DEDD, FKBP4, GATA3, H3F3A, INHBA, KIT, NKX2-1, NPM2, OSR1, PAFAH1B1, PRM2, ROPN1, SOD1, SPEM1, SRD5A1, TNP1, TNP2, TSSK6, UBE2B, UBE2J1, WNT5A, YBX3]
regulation of protein complex assembly	26	[ACTR3, ARF1, ARPC1A, ARPC2, ARPC4, BCL2L11, CAPZA2, CAPZA3, CAPZB, CTNNB1, GTF2F2, HMGB1, HSPA1A, JUN, LMO4, MTPN, PAK1, PFN1, RAC1, RACK1, RDX, RPS3, SLF1, STMN1, SUMO1, VPS41]
developmental process involved in reproduction	26	[BCL2L11, CAPZA3, CITED2, CTNNB1, DEDD, FKBP4, GATA3, H3F3A, INHBA, KIT, NKX2-1, NPM2, OSR1, PAFAH1B1, PRM2, ROPN1, SOD1, SPEM1, SRD5A1, TNP1, TNP2, TSSK6, UBE2B, UBE2J1, WNT5A, YBX3]
signal transduction by protein phosphorylation	25	[CAB39, CCL14, CD44, CTNNB1, DUSP14, EFNA1, EZR, GPS2, HAND2, HMGB1, INHBA, JUN, KIT, NCOR1, OSR1, PABPN1, PAFAH1B1, PAK1, RAP1B, RPS3, SOD1, TGFB2, VRK3, WNT5A, YWHAE]
ribonucleoprotein complex subunit organization	25	[CNOT7, HSP90AA1, LSM14A, NSUN4, POLR2D, PTGES3, RPL10, RPL11, RPL12, RPL13A, RPL24, RPL3, RPL38, RPL5, RPL6, RPS15, RPS17, RPS19, RPS23, RPS28, RPS5, RPSA, RUVBL1, SLU7, SRPK2]
ribonucleoprotein complex assembly	25	[CNOT7, HSP90AA1, LSM14A, NSUN4, POLR2D, PTGES3, RPL10, RPL11, RPL12, RPL13A, RPL24, RPL3, RPL38, RPL5, RPL6, RPS15, RPS17, RPS19, RPS23, RPS28, RPS5, RPSA, RUVBL1, SLU7, SRPK2]
ribonucleoprotein complex subunit organization	25	[CNOT7, HSP90AA1, LSM14A, NSUN4, POLR2D, PTGES3, RPL10, RPL11, RPL12, RPL13A, RPL24, RPL3, RPL38, RPL5, RPL6, RPS15, RPS17, RPS19, RPS23, RPS28, RPS5, RPSA, RUVBL1, SLU7, SRPK2]
ribonucleoprotein complex assembly	25	[CNOT7, HSP90AA1, LSM14A, NSUN4, POLR2D, PTGES3, RPL10, RPL11, RPL12, RPL13A, RPL24, RPL3, RPL38, RPL5, RPL6, RPS15, RPS17, RPS19, RPS23, RPS28, RPS5, RPSA, RUVBL1, SLU7, SRPK2]
ribonucleoprotein complex subunit organization	25	[CNOT7, HSP90AA1, LSM14A, NSUN4, POLR2D, PTGES3, RPL10, RPL11, RPL12, RPL13A, RPL24, RPL3, RPL38, RPL5, RPL6, RPS15, RPS17, RPS19, RPS23, RPS28, RPS5, RPSA, RUVBL1, SLU7, SRPK2]
ribonucleoprotein complex assembly	25	[CNOT7, HSP90AA1, LSM14A, NSUN4, POLR2D, PTGES3, RPL10, RPL11, RPL12, RPL13A, RPL24, RPL3, RPL38, RPL5, RPL6, RPS15, RPS17, RPS19, RPS23, RPS28, RPS5, RPSA, RUVBL1, SLU7, SRPK2]
regulation of translation	25	[CNOT7, DDX5, EIF3E, EIF4A3, EIF4E, EIF4G2, EIF5, EIF5A, FXR1, GAPDH, HABP4, LSM14A, NCOR1, NSUN4, PAIP2, POLR2D, RACK1, RPL10, RPL13A, RPL26, RPL38, RPS3, RPS9, SERP1, SYNCRIP]
signal transduction by protein phosphorylation	25	[CAB39, CCL14, CD44, CTNNB1, DUSP14, EFNA1, EZR, GPS2, HAND2, HMGB1, INHBA, JUN, KIT, NCOR1, OSR1, PABPN1, PAFAH1B1, PAK1, RAP1B, RPS3, SOD1, TGFB2, VRK3, WNT5A, YWHAE]
mitochondrial envelope	25	[ARL2BP, CABS1, CHCHD2, CISD1, COX1, COX4I1, COX7A2, COX7A2L, COX7B, CSDE1, FUNDC2, LGALS3, LPIN1, NDUFA5, NDUFB2, PRELID2, ROMO1, RPS3, SDHAF3, SDHB, SLC25A3, SLC25A39, SLC25A6, SORD, SPATA18]
signal transduction by protein phosphorylation	25	[CAB39, CCL14, CD44, CTNNB1, DUSP14, EFNA1, EZR, GPS2, HAND2, HMGB1, INHBA, JUN, KIT, NCOR1, OSR1, PABPN1, PAFAH1B1, PAK1, RAP1B, RPS3, SOD1, TGFB2, VRK3, WNT5A, YWHAE]
regulation of proteolysis	25	[ADRM1, APOPT1, ARIH1, BAG5, BCL2L11, CD44, DBIL5, EFNA1, HMGB1, MGC137055, PEBP1, PRDX5, PRSS37, PSME1, PSMF1, RACK1, RPL11, RPS3, RPS7, SUMO1, TNP1, TNP2, UBA52, UBB, UBE2J1]
signal transduction by protein phosphorylation	25	[CAB39, CCL14, CD44, CTNNB1, DUSP14, EFNA1, EZR, GPS2, HAND2, HMGB1, INHBA, JUN, KIT, NCOR1, OSR1, PABPN1, PAFAH1B1, PAK1, RAP1B, RPS3, SOD1, TGFB2, VRK3, WNT5A, YWHAE]
regulation of translation	25	[CNOT7, DDX5, EIF3E, EIF4A3, EIF4E, EIF4G2, EIF5, EIF5A, FXR1, GAPDH, HABP4, LSM14A, NCOR1, NSUN4, PAIP2, POLR2D, RACK1, RPL10, RPL13A, RPL26, RPL38, RPS3, RPS9, SERP1, SYNCRIP]
signal transduction by protein phosphorylation	25	[CAB39, CCL14, CD44, CTNNB1, DUSP14, EFNA1, EZR, GPS2, HAND2, HMGB1, INHBA, JUN, KIT, NCOR1, OSR1, PABPN1, PAFAH1B1, PAK1, RAP1B, RPS3, SOD1, TGFB2, VRK3, WNT5A, YWHAE]
regulation of translation	25	[CNOT7, DDX5, EIF3E, EIF4A3, EIF4E, EIF4G2, EIF5, EIF5A, FXR1, GAPDH, HABP4, LSM14A, NCOR1, NSUN4, PAIP2, POLR2D, RACK1, RPL10, RPL13A, RPL26, RPL38, RPS3, RPS9, SERP1, SYNCRIP]
regulation of translation	25	[CNOT7, DDX5, EIF3E, EIF4A3, EIF4E, EIF4G2, EIF5, EIF5A, FXR1, GAPDH, HABP4, LSM14A, NCOR1, NSUN4, PAIP2, POLR2D, RACK1, RPL10, RPL13A, RPL26, RPL38, RPS3, RPS9, SERP1, SYNCRIP]
mitochondrial envelope	25	[ARL2BP, CABS1, CHCHD2, CISD1, COX1, COX4I1, COX7A2, COX7A2L, COX7B, CSDE1, FUNDC2, LGALS3, LPIN1, NDUFA5, NDUFB2, PRELID2, ROMO1, RPS3, SDHAF3, SDHB, SLC25A3, SLC25A39, SLC25A6, SORD, SPATA18]
signal transduction by protein phosphorylation	25	[CAB39, CCL14, CD44, CTNNB1, DUSP14, EFNA1, EZR, GPS2, HAND2, HMGB1, INHBA, JUN, KIT, NCOR1, OSR1, PABPN1, PAFAH1B1, PAK1, RAP1B, RPS3, SOD1, TGFB2, VRK3, WNT5A, YWHAE]
ribonucleoprotein complex subunit organization	25	[CNOT7, HSP90AA1, LSM14A, NSUN4, POLR2D, PTGES3, RPL10, RPL11, RPL12, RPL13A, RPL24, RPL3, RPL38, RPL5, RPL6, RPS15, RPS17, RPS19, RPS23, RPS28, RPS5, RPSA, RUVBL1, SLU7, SRPK2]
ribonucleoprotein complex assembly	25	[CNOT7, HSP90AA1, LSM14A, NSUN4, POLR2D, PTGES3, RPL10, RPL11, RPL12, RPL13A, RPL24, RPL3, RPL38, RPL5, RPL6, RPS15, RPS17, RPS19, RPS23, RPS28, RPS5, RPSA, RUVBL1, SLU7, SRPK2]
regulation of translation	25	[CNOT7, DDX5, EIF3E, EIF4A3, EIF4E, EIF4G2, EIF5, EIF5A, FXR1, GAPDH, HABP4, LSM14A, NCOR1, NSUN4, PAIP2, POLR2D, RACK1, RPL10, RPL13A, RPL26, RPL38, RPS3, RPS9, SERP1, SYNCRIP]
regulation of proteolysis	25	[ADRM1, APOPT1, ARIH1, BAG5, BCL2L11, CD44, DBIL5, EFNA1, HMGB1, MGC137055, PEBP1, PRDX5, PRSS37, PSME1, PSMF1, RACK1, RPL11, RPS3, RPS7, SUMO1, TNP1, TNP2, UBA52, UBB, UBE2J1]
signal transduction by protein phosphorylation	25	[CAB39, CCL14, CD44, CTNNB1, DUSP14, EFNA1, EZR, GPS2, HAND2, HMGB1, INHBA, JUN, KIT, NCOR1, OSR1, PABPN1, PAFAH1B1, PAK1, RAP1B, RPS3, SOD1, TGFB2, VRK3, WNT5A, YWHAE]
regulation of proteolysis	25	[ADRM1, APOPT1, ARIH1, BAG5, BCL2L11, CD44, DBIL5, EFNA1, HMGB1, MGC137055, PEBP1, PRDX5, PRSS37, PSME1, PSMF1, RACK1, RPL11, RPS3, RPS7, SUMO1, TNP1, TNP2, UBA52, UBB, UBE2J1]
signal transduction by protein phosphorylation	25	[CAB39, CCL14, CD44, CTNNB1, DUSP14, EFNA1, EZR, GPS2, HAND2, HMGB1, INHBA, JUN, KIT, NCOR1, OSR1, PABPN1, PAFAH1B1, PAK1, RAP1B, RPS3, SOD1, TGFB2, VRK3, WNT5A, YWHAE]
ribonucleoprotein complex subunit organization	25	[CNOT7, HSP90AA1, LSM14A, NSUN4, POLR2D, PTGES3, RPL10, RPL11, RPL12, RPL13A, RPL24, RPL3, RPL38, RPL5, RPL6, RPS15, RPS17, RPS19, RPS23, RPS28, RPS5, RPSA, RUVBL1, SLU7, SRPK2]
ribonucleoprotein complex assembly	25	[CNOT7, HSP90AA1, LSM14A, NSUN4, POLR2D, PTGES3, RPL10, RPL11, RPL12, RPL13A, RPL24, RPL3, RPL38, RPL5, RPL6, RPS15, RPS17, RPS19, RPS23, RPS28, RPS5, RPSA, RUVBL1, SLU7, SRPK2]
extracellular matrix	24	[ACTG1, CFL1, DDX5, HDGF, HNRNPK, HNRNPU, HSPB1, LGALS3, RAC1, RPL11, RPL12, RPS11, RPS17, RPS18, RPS20, RPS3, RPS5, RPS7, SLC25A6, SOD1, TGFB2, TUBB4B, VIM, WNT5A]
nuclear outer membrane-endoplasmic reticulum membrane network	24	[ATL3, BICD2, CALU, CAMK2D, CYB5A, DPM3, EIF5A, FKBP1A, GPAT3, GSG1, INSIG2, JPH1, PYURF, REEP6, RETREG1, SEC61B, SERP1, SGMS2, SRD5A1, SSR2, TMED6, TMEM258, UBXN4, ZNRF4]
microtubule cytoskeleton organization	24	[BICD2, CAPZB, CHMP5, CTNNB1, EZR, FKBP4, GABARAP, GAPDH, HNRNPU, HSPA1A, KIF2C, MAP7, NCOR1, ODF2, PAFAH1B1, PAK1, PCNT, RAB11A, RAC1, RHOA, RPS3, STMN1, TRIM36, UBE2B]
epithelial cell differentiation	24	[BTG1, CDH3, CTNNB1, DLX5, ELF5, EZR, FOXP1, GATA3, IRF6, JUN, LBH, LELP1, LGALS3, NKX2-1, OSR1, PAFAH1B1, RAP1B, RDX, RHOA, SOD1, TAF10, TAGLN2, VIM, WNT5A]
ubiquitin-like protein ligase binding	24	[ACTG1, ARIH1, BAG5, CDC34, GABARAP, GPI, HSPA1L, JUN, MAP1LC3A, MPHOSPH8, PPARGC1A, RPL11, SLF1, SUMO1, SUMO2, TPI1, UBE2B, UBE2F, UBE2J1, UBE2N, UBE2R2, UBE2V1, YWHAE, YWHAZ]
ubiquitin protein ligase binding	24	[ACTG1, ARIH1, BAG5, CDC34, GABARAP, GPI, HSPA1L, JUN, MAP1LC3A, MPHOSPH8, PPARGC1A, RPL11, SLF1, SUMO1, SUMO2, TPI1, UBE2B, UBE2F, UBE2J1, UBE2N, UBE2R2, UBE2V1, YWHAE, YWHAZ]
nuclear chromosome	24	[ACTB, CHD4, CITED2, CTNNB1, DLX5, GATA3, H2AFJ, H3F3A, HAND2, HMGB1, HNRNPK, HNRNPU, JUN, KLHDC3, MPHOSPH8, NCOR1, NPM2, PPP1CB, RAD21, RUVBL1, SWI5, TNP1, TNP2, UBE2B]
epithelial cell differentiation	24	[BTG1, CDH3, CTNNB1, DLX5, ELF5, EZR, FOXP1, GATA3, IRF6, JUN, LBH, LELP1, LGALS3, NKX2-1, OSR1, PAFAH1B1, RAP1B, RDX, RHOA, SOD1, TAF10, TAGLN2, VIM, WNT5A]
nuclear chromosome	24	[ACTB, CHD4, CITED2, CTNNB1, DLX5, GATA3, H2AFJ, H3F3A, HAND2, HMGB1, HNRNPK, HNRNPU, JUN, KLHDC3, MPHOSPH8, NCOR1, NPM2, PPP1CB, RAD21, RUVBL1, SWI5, TNP1, TNP2, UBE2B]
epithelial cell differentiation	24	[BTG1, CDH3, CTNNB1, DLX5, ELF5, EZR, FOXP1, GATA3, IRF6, JUN, LBH, LELP1, LGALS3, NKX2-1, OSR1, PAFAH1B1, RAP1B, RDX, RHOA, SOD1, TAF10, TAGLN2, VIM, WNT5A]
mRNA metabolic process	24	[ATF4, CNOT7, CSDE1, CTNNBL1, DDX5, EIF3E, EIF4A3, HNRNPK, HNRNPL, HNRNPU, KHDRBS3, LSM2, NOVA1, PABPC1, PABPN1, POLR2D, SF3B6, SLU7, SRPK2, SRSF3, SRSF9, SYNCRIP, TRA2B, YBX1]
nuclear chromosome	24	[ACTB, CHD4, CITED2, CTNNB1, DLX5, GATA3, H2AFJ, H3F3A, HAND2, HMGB1, HNRNPK, HNRNPU, JUN, KLHDC3, MPHOSPH8, NCOR1, NPM2, PPP1CB, RAD21, RUVBL1, SWI5, TNP1, TNP2, UBE2B]
epithelial cell differentiation	24	[BTG1, CDH3, CTNNB1, DLX5, ELF5, EZR, FOXP1, GATA3, IRF6, JUN, LBH, LELP1, LGALS3, NKX2-1, OSR1, PAFAH1B1, RAP1B, RDX, RHOA, SOD1, TAF10, TAGLN2, VIM, WNT5A]
microtubule cytoskeleton organization	24	[BICD2, CAPZB, CHMP5, CTNNB1, EZR, FKBP4, GABARAP, GAPDH, HNRNPU, HSPA1A, KIF2C, MAP7, NCOR1, ODF2, PAFAH1B1, PAK1, PCNT, RAB11A, RAC1, RHOA, RPS3, STMN1, TRIM36, UBE2B]
epithelial cell differentiation	24	[BTG1, CDH3, CTNNB1, DLX5, ELF5, EZR, FOXP1, GATA3, IRF6, JUN, LBH, LELP1, LGALS3, NKX2-1, OSR1, PAFAH1B1, RAP1B, RDX, RHOA, SOD1, TAF10, TAGLN2, VIM, WNT5A]
mRNA metabolic process	24	[ATF4, CNOT7, CSDE1, CTNNBL1, DDX5, EIF3E, EIF4A3, HNRNPK, HNRNPL, HNRNPU, KHDRBS3, LSM2, NOVA1, PABPC1, PABPN1, POLR2D, SF3B6, SLU7, SRPK2, SRSF3, SRSF9, SYNCRIP, TRA2B, YBX1]
ubiquitin-like protein ligase binding	24	[ACTG1, ARIH1, BAG5, CDC34, GABARAP, GPI, HSPA1L, JUN, MAP1LC3A, MPHOSPH8, PPARGC1A, RPL11, SLF1, SUMO1, SUMO2, TPI1, UBE2B, UBE2F, UBE2J1, UBE2N, UBE2R2, UBE2V1, YWHAE, YWHAZ]
ubiquitin protein ligase binding	24	[ACTG1, ARIH1, BAG5, CDC34, GABARAP, GPI, HSPA1L, JUN, MAP1LC3A, MPHOSPH8, PPARGC1A, RPL11, SLF1, SUMO1, SUMO2, TPI1, UBE2B, UBE2F, UBE2J1, UBE2N, UBE2R2, UBE2V1, YWHAE, YWHAZ]
mitotic cell cycle process	24	[ARF1, CCNY, CFL1, CHMP5, EIF4E, HNRNPU, HSPA1A, INHBA, KIF22, KIF2C, NPM2, PAFAH1B1, PCNT, PSME1, RAB11A, RAD21, RDX, RHOA, RPL24, RPL26, SLF1, STMN1, TAF10, TRIM36]
microtubule cytoskeleton organization	24	[BICD2, CAPZB, CHMP5, CTNNB1, EZR, FKBP4, GABARAP, GAPDH, HNRNPU, HSPA1A, KIF2C, MAP7, NCOR1, ODF2, PAFAH1B1, PAK1, PCNT, RAB11A, RAC1, RHOA, RPS3, STMN1, TRIM36, UBE2B]
cell part morphogenesis	24	[CD44, CFL1, CTNNB1, DLX5, DPYSL2, EFNA1, ELAVL4, FOXP1, GAP43, GATA3, KIF5C, NKX2-1, NR4A3, NRN1, PAFAH1B1, PAK1, POLG2, RAB11A, RIMS2, RPL24, STMN1, UBA52, UBB, WNT5A]
carbohydrate metabolic process	24	[ALDH5A1, ATF4, ENO1, FBP1, GAPDH, GAPDHS, GPI, GSTO2, HAS2, HMGB1, LDHB, NCOR1, PGAM2, PGP, PHKG2, PKM, PPP1CB, PPP1R2, PTGES3, SDHAF3, SERP1, SORD, ST6GALNAC2, TPI1]
microtubule cytoskeleton organization	24	[BICD2, CAPZB, CHMP5, CTNNB1, EZR, FKBP4, GABARAP, GAPDH, HNRNPU, HSPA1A, KIF2C, MAP7, NCOR1, ODF2, PAFAH1B1, PAK1, PCNT, RAB11A, RAC1, RHOA, RPS3, STMN1, TRIM36, UBE2B]
epithelial cell differentiation	24	[BTG1, CDH3, CTNNB1, DLX5, ELF5, EZR, FOXP1, GATA3, IRF6, JUN, LBH, LELP1, LGALS3, NKX2-1, OSR1, PAFAH1B1, RAP1B, RDX, RHOA, SOD1, TAF10, TAGLN2, VIM, WNT5A]
perinuclear region of cytoplasm	23	[ARF1, BAG5, CAPZB, CTNNB1, CYLC1, CYLC2, EIF4E, EZR, FXR1, INHBA, LAMP1, MTPN, PAFAH1B1, PRDX5, PSMF1, RAB11A, RAB15, RACK1, RPS6, S100A14, SLC30A7, TAF10, WBP2NL]
mRNA binding	23	[DDX5, EIF4A3, ELAVL4, FXR1, HNRNPC, HNRNPU, IGF2BP3, LOC100299503, NOVA1, PAIP2, PCBP1, RPL13A, RPL26, RPL35, RPL36, RPL7, RPS26, RPS3, RPS5, RPS7, SERBP1, TRA2B, YBX3]
endoplasmic reticulum membrane	23	[ATL3, CALU, CAMK2D, CYB5A, DPM3, EIF5A, FKBP1A, GPAT3, GSG1, INSIG2, JPH1, PYURF, REEP6, RETREG1, SEC61B, SERP1, SGMS2, SRD5A1, SSR2, TMED6, TMEM258, UBXN4, ZNRF4]
endoplasmic reticulum subcompartment	23	[ATL3, CALU, CAMK2D, CYB5A, DPM3, EIF5A, FKBP1A, GPAT3, GSG1, INSIG2, JPH1, PYURF, REEP6, RETREG1, SEC61B, SERP1, SGMS2, SRD5A1, SSR2, TMED6, TMEM258, UBXN4, ZNRF4]
microtubule organizing center	23	[ARL2BP, ATF4, BICD2, CCDC77, CEP41, CETN1, CHD4, CTNNB1, DCAF12, DYNLL1, DYNLL2, EZR, HNRNPU, HSPA1A, KIF2C, MLLT11, ODF2, PAFAH1B1, PCNT, RAB11A, RPS7, SLF1, UBXN6]
nuclear chromosome part	23	[ACTB, CHD4, CITED2, CTNNB1, DLX5, GATA3, H2AFJ, H3F3A, HAND2, HMGB1, HNRNPK, JUN, KLHDC3, MPHOSPH8, NCOR1, NPM2, PPP1CB, RAD21, RUVBL1, SWI5, TNP1, TNP2, UBE2B]
sensory organ development	23	[BCL2L11, CITED2, CTNNB1, DLX5, GATA3, GSDME, HAND2, HMGB1, INHBA, INSIG2, JUN, MEIS1, NR4A3, OSR1, PAFAH1B1, PRRX1, RPL24, RPL38, SIX6, SOD1, TGFB2, VIM, WNT5A]
embryo development ending in birth or egg hatching	23	[BCL2L11, BTF3, CFL1, CITED2, CTNNB1, EIF4A3, FOXP1, GATA3, GPI, HAND2, LMO4, NMT1, OSR1, PHGDH, POLG2, PRRX1, RTF1, SF3B6, UBE2B, VIM, WNT5A, YBX1, YBX3]
sensory organ development	23	[BCL2L11, CITED2, CTNNB1, DLX5, GATA3, GSDME, HAND2, HMGB1, INHBA, INSIG2, JUN, MEIS1, NR4A3, OSR1, PAFAH1B1, PRRX1, RPL24, RPL38, SIX6, SOD1, TGFB2, VIM, WNT5A]
chordate embryonic development	23	[BCL2L11, BTF3, CFL1, CITED2, CTNNB1, EIF4A3, FOXP1, GATA3, GPI, HAND2, LMO4, NMT1, OSR1, PHGDH, POLG2, PRRX1, RTF1, SF3B6, UBE2B, VIM, WNT5A, YBX1, YBX3]
sensory organ development	23	[BCL2L11, CITED2, CTNNB1, DLX5, GATA3, GSDME, HAND2, HMGB1, INHBA, INSIG2, JUN, MEIS1, NR4A3, OSR1, PAFAH1B1, PRRX1, RPL24, RPL38, SIX6, SOD1, TGFB2, VIM, WNT5A]
embryo development ending in birth or egg hatching	23	[BCL2L11, BTF3, CFL1, CITED2, CTNNB1, EIF4A3, FOXP1, GATA3, GPI, HAND2, LMO4, NMT1, OSR1, PHGDH, POLG2, PRRX1, RTF1, SF3B6, UBE2B, VIM, WNT5A, YBX1, YBX3]
chordate embryonic development	23	[BCL2L11, BTF3, CFL1, CITED2, CTNNB1, EIF4A3, FOXP1, GATA3, GPI, HAND2, LMO4, NMT1, OSR1, PHGDH, POLG2, PRRX1, RTF1, SF3B6, UBE2B, VIM, WNT5A, YBX1, YBX3]
positive regulation of cell death	23	[APOPT1, ATF4, BCL2L11, BTG1, CTNNB1, CTNNBL1, DKKL1, EIF5A, GSDME, HMGB1, INHBA, JUN, MLLT11, NR4A3, RACK1, RPL11, RPL26, RPS3, RPS7, TGFB2, UBA52, UBB, WNT5A]
positive regulation of programmed cell death	23	[APOPT1, ATF4, BCL2L11, BTG1, CTNNB1, CTNNBL1, DKKL1, EIF5A, GSDME, HMGB1, INHBA, JUN, MLLT11, NR4A3, RACK1, RPL11, RPL26, RPS3, RPS7, TGFB2, UBA52, UBB, WNT5A]
positive regulation of apoptotic process	23	[APOPT1, ATF4, BCL2L11, BTG1, CTNNB1, CTNNBL1, DKKL1, EIF5A, GSDME, HMGB1, INHBA, JUN, MLLT11, NR4A3, RACK1, RPL11, RPL26, RPS3, RPS7, TGFB2, UBA52, UBB, WNT5A]
nuclear chromosome part	23	[ACTB, CHD4, CITED2, CTNNB1, DLX5, GATA3, H2AFJ, H3F3A, HAND2, HMGB1, HNRNPK, JUN, KLHDC3, MPHOSPH8, NCOR1, NPM2, PPP1CB, RAD21, RUVBL1, SWI5, TNP1, TNP2, UBE2B]
cell projection morphogenesis	23	[CD44, CFL1, CTNNB1, DLX5, DPYSL2, EFNA1, ELAVL4, FOXP1, GAP43, GATA3, KIF5C, NKX2-1, NR4A3, NRN1, PAFAH1B1, PAK1, RAB11A, RIMS2, RPL24, STMN1, UBA52, UBB, WNT5A]
plasma membrane bounded cell projection morphogenesis	23	[CD44, CFL1, CTNNB1, DLX5, DPYSL2, EFNA1, ELAVL4, FOXP1, GAP43, GATA3, KIF5C, NKX2-1, NR4A3, NRN1, PAFAH1B1, PAK1, RAB11A, RIMS2, RPL24, STMN1, UBA52, UBB, WNT5A]
microtubule organizing center	23	[ARL2BP, ATF4, BICD2, CCDC77, CEP41, CETN1, CHD4, CTNNB1, DCAF12, DYNLL1, DYNLL2, EZR, HNRNPU, HSPA1A, KIF2C, MLLT11, ODF2, PAFAH1B1, PCNT, RAB11A, RPS7, SLF1, UBXN6]
regulation of cellular catabolic process	23	[ARIH1, BAG5, CNOT7, EFNA1, EZR, HMGB1, HNRNPU, MGC137055, PABPC1, PGAM2, PSME1, PSMF1, RACK1, RDX, RPL11, RPS7, RUVBL1, SUMO1, SYNCRIP, UBA52, UBB, UBE2J1, YBX1]
RNA polymerase II regulatory region DNA binding	23	[ACTB, ATF4, BHLHE41, CHD4, CREB3L2, CTNNB1, DLX5, ELF5, FOXP1, GATA3, H3F3A, HAND2, HNRNPK, JUN, MEIS1, NKX2-1, NR4A3, PRRX1, RPS3, TFAM, THAP1, YBX1, YBX3]
RNA polymerase II regulatory region sequence-specific DNA binding	23	[ACTB, ATF4, BHLHE41, CHD4, CREB3L2, CTNNB1, DLX5, ELF5, FOXP1, GATA3, H3F3A, HAND2, HNRNPK, JUN, MEIS1, NKX2-1, NR4A3, PRRX1, RPS3, TFAM, THAP1, YBX1, YBX3]
sensory organ development	23	[BCL2L11, CITED2, CTNNB1, DLX5, GATA3, GSDME, HAND2, HMGB1, INHBA, INSIG2, JUN, MEIS1, NR4A3, OSR1, PAFAH1B1, PRRX1, RPL24, RPL38, SIX6, SOD1, TGFB2, VIM, WNT5A]
RNA polymerase II regulatory region DNA binding	23	[ACTB, ATF4, BHLHE41, CHD4, CREB3L2, CTNNB1, DLX5, ELF5, FOXP1, GATA3, H3F3A, HAND2, HNRNPK, JUN, MEIS1, NKX2-1, NR4A3, PRRX1, RPS3, TFAM, THAP1, YBX1, YBX3]
RNA polymerase II regulatory region sequence-specific DNA binding	23	[ACTB, ATF4, BHLHE41, CHD4, CREB3L2, CTNNB1, DLX5, ELF5, FOXP1, GATA3, H3F3A, HAND2, HNRNPK, JUN, MEIS1, NKX2-1, NR4A3, PRRX1, RPS3, TFAM, THAP1, YBX1, YBX3]
cell projection morphogenesis	23	[CD44, CFL1, CTNNB1, DLX5, DPYSL2, EFNA1, ELAVL4, FOXP1, GAP43, GATA3, KIF5C, NKX2-1, NR4A3, NRN1, PAFAH1B1, PAK1, RAB11A, RIMS2, RPL24, STMN1, UBA52, UBB, WNT5A]
plasma membrane bounded cell projection morphogenesis	23	[CD44, CFL1, CTNNB1, DLX5, DPYSL2, EFNA1, ELAVL4, FOXP1, GAP43, GATA3, KIF5C, NKX2-1, NR4A3, NRN1, PAFAH1B1, PAK1, RAB11A, RIMS2, RPL24, STMN1, UBA52, UBB, WNT5A]
regulation of cellular catabolic process	23	[ARIH1, BAG5, CNOT7, EFNA1, EZR, HMGB1, HNRNPU, MGC137055, PABPC1, PGAM2, PSME1, PSMF1, RACK1, RDX, RPL11, RPS7, RUVBL1, SUMO1, SYNCRIP, UBA52, UBB, UBE2J1, YBX1]
modification-dependent macromolecule catabolic process	23	[ADRM1, ARIH1, BAG5, CDC34, FBXO8, MGC137055, PSMF1, RACK1, RNF11, RPL11, RPS7, SEC61B, SKP1, SOD1, SUMO1, UBE2B, UBE2J1, UBE2N, UBE2R2, UBXN11, UBXN4, ZNRF1, ZNRF4]
proteasomal protein catabolic process	23	[ARIH1, BAG5, CDC34, GET4, MGC137055, PSME1, PSMF1, RACK1, RNF11, RPL11, SEC61B, SKP1, SOD1, SUMO1, UBA52, UBB, UBE2B, UBE2J1, UBE2R2, UBXN11, UBXN4, UBXN6, ZNRF1]
modification-dependent protein catabolic process	23	[ADRM1, ARIH1, BAG5, CDC34, FBXO8, MGC137055, PSMF1, RACK1, RNF11, RPL11, RPS7, SEC61B, SKP1, SOD1, SUMO1, UBE2B, UBE2J1, UBE2N, UBE2R2, UBXN11, UBXN4, ZNRF1, ZNRF4]
ubiquitin-dependent protein catabolic process	23	[ADRM1, ARIH1, BAG5, CDC34, FBXO8, MGC137055, PSMF1, RACK1, RNF11, RPL11, RPS7, SEC61B, SKP1, SOD1, SUMO1, UBE2B, UBE2J1, UBE2N, UBE2R2, UBXN11, UBXN4, ZNRF1, ZNRF4]
positive regulation of cell death	23	[APOPT1, ATF4, BCL2L11, BTG1, CTNNB1, CTNNBL1, DKKL1, EIF5A, GSDME, HMGB1, INHBA, JUN, MLLT11, NR4A3, RACK1, RPL11, RPL26, RPS3, RPS7, TGFB2, UBA52, UBB, WNT5A]
sensory organ development	23	[BCL2L11, CITED2, CTNNB1, DLX5, GATA3, GSDME, HAND2, HMGB1, INHBA, INSIG2, JUN, MEIS1, NR4A3, OSR1, PAFAH1B1, PRRX1, RPL24, RPL38, SIX6, SOD1, TGFB2, VIM, WNT5A]
positive regulation of programmed cell death	23	[APOPT1, ATF4, BCL2L11, BTG1, CTNNB1, CTNNBL1, DKKL1, EIF5A, GSDME, HMGB1, INHBA, JUN, MLLT11, NR4A3, RACK1, RPL11, RPL26, RPS3, RPS7, TGFB2, UBA52, UBB, WNT5A]
positive regulation of apoptotic process	23	[APOPT1, ATF4, BCL2L11, BTG1, CTNNB1, CTNNBL1, DKKL1, EIF5A, GSDME, HMGB1, INHBA, JUN, MLLT11, NR4A3, RACK1, RPL11, RPL26, RPS3, RPS7, TGFB2, UBA52, UBB, WNT5A]
positive regulation of cell death	23	[APOPT1, ATF4, BCL2L11, BTG1, CTNNB1, CTNNBL1, DKKL1, EIF5A, GSDME, HMGB1, INHBA, JUN, MLLT11, NR4A3, RACK1, RPL11, RPL26, RPS3, RPS7, TGFB2, UBA52, UBB, WNT5A]
sensory organ development	23	[BCL2L11, CITED2, CTNNB1, DLX5, GATA3, GSDME, HAND2, HMGB1, INHBA, INSIG2, JUN, MEIS1, NR4A3, OSR1, PAFAH1B1, PRRX1, RPL24, RPL38, SIX6, SOD1, TGFB2, VIM, WNT5A]
positive regulation of programmed cell death	23	[APOPT1, ATF4, BCL2L11, BTG1, CTNNB1, CTNNBL1, DKKL1, EIF5A, GSDME, HMGB1, INHBA, JUN, MLLT11, NR4A3, RACK1, RPL11, RPL26, RPS3, RPS7, TGFB2, UBA52, UBB, WNT5A]
positive regulation of apoptotic process	23	[APOPT1, ATF4, BCL2L11, BTG1, CTNNB1, CTNNBL1, DKKL1, EIF5A, GSDME, HMGB1, INHBA, JUN, MLLT11, NR4A3, RACK1, RPL11, RPL26, RPS3, RPS7, TGFB2, UBA52, UBB, WNT5A]
sensory organ development	23	[BCL2L11, CITED2, CTNNB1, DLX5, GATA3, GSDME, HAND2, HMGB1, INHBA, INSIG2, JUN, MEIS1, NR4A3, OSR1, PAFAH1B1, PRRX1, RPL24, RPL38, SIX6, SOD1, TGFB2, VIM, WNT5A]
cell projection morphogenesis	23	[CD44, CFL1, CTNNB1, DLX5, DPYSL2, EFNA1, ELAVL4, FOXP1, GAP43, GATA3, KIF5C, NKX2-1, NR4A3, NRN1, PAFAH1B1, PAK1, RAB11A, RIMS2, RPL24, STMN1, UBA52, UBB, WNT5A]
plasma membrane bounded cell projection morphogenesis	23	[CD44, CFL1, CTNNB1, DLX5, DPYSL2, EFNA1, ELAVL4, FOXP1, GAP43, GATA3, KIF5C, NKX2-1, NR4A3, NRN1, PAFAH1B1, PAK1, RAB11A, RIMS2, RPL24, STMN1, UBA52, UBB, WNT5A]
embryo development ending in birth or egg hatching	23	[BCL2L11, BTF3, CFL1, CITED2, CTNNB1, EIF4A3, FOXP1, GATA3, GPI, HAND2, LMO4, NMT1, OSR1, PHGDH, POLG2, PRRX1, RTF1, SF3B6, UBE2B, VIM, WNT5A, YBX1, YBX3]
sensory organ development	23	[BCL2L11, CITED2, CTNNB1, DLX5, GATA3, GSDME, HAND2, HMGB1, INHBA, INSIG2, JUN, MEIS1, NR4A3, OSR1, PAFAH1B1, PRRX1, RPL24, RPL38, SIX6, SOD1, TGFB2, VIM, WNT5A]
chordate embryonic development	23	[BCL2L11, BTF3, CFL1, CITED2, CTNNB1, EIF4A3, FOXP1, GATA3, GPI, HAND2, LMO4, NMT1, OSR1, PHGDH, POLG2, PRRX1, RTF1, SF3B6, UBE2B, VIM, WNT5A, YBX1, YBX3]
cofactor metabolic process	22	[AHCYL2, ALDH5A1, ASPDH, COQ10B, EEF1G, ENO1, FBP1, GAPDH, GAPDHS, GPI, GSTO2, MAT2A, NCOR1, PDHA2, PGAM2, PKM, QDPR, SLC25A39, SOD1, SUCLG2, THTPA, TPI1]
organelle localization	22	[ACTR3, BICD2, CDH3, CHMP5, CPLX2, CTNNB1, EZR, HNRNPU, KIF22, KIF2C, KIT, LAMP1, NR4A3, PAFAH1B1, RAB11A, RAB15, RAP1B, RIMS2, UBA52, UBB, UBE2B, YWHAZ]
transcription factor activity, transcription factor binding	22	[ANKRD2, ARL2BP, BHLHE41, CITED2, CNOT7, CTNNB1, DNAJB1, FBP1, GATA3, GPS2, HDGF, HNRNPU, HSPA1A, JUN, LPIN1, LPXN, NACA, NCOR1, PPARGC1A, PRRX1, RTF1, TAF10]
negative regulation of cellular component organization	22	[BAG5, CAPZA2, CAPZA3, CAPZB, DNAJA4, DNAJB8, EFNA1, FKBP4, H3F3A, HMGB1, HNRNPU, LGALS3, LMO4, MTPN, RACK1, RAD21, RDX, RPL13A, STMN1, UBE2B, VIM, WNT5A]
cofactor metabolic process	22	[AHCYL2, ALDH5A1, ASPDH, COQ10B, EEF1G, ENO1, FBP1, GAPDH, GAPDHS, GPI, GSTO2, MAT2A, NCOR1, PDHA2, PGAM2, PKM, QDPR, SLC25A39, SOD1, SUCLG2, THTPA, TPI1]
organelle localization	22	[ACTR3, BICD2, CDH3, CHMP5, CPLX2, CTNNB1, EZR, HNRNPU, KIF22, KIF2C, KIT, LAMP1, NR4A3, PAFAH1B1, RAB11A, RAB15, RAP1B, RIMS2, UBA52, UBB, UBE2B, YWHAZ]
negative regulation of cell differentiation	22	[ANKRD2, BAG5, BHLHE41, CTNNB1, EFNA1, EIF4E, ELF5, FKBP4, FOXP1, GATA3, GPS2, HAND2, HMGB1, HNRNPU, LBH, MEIS1, NKX2-1, OSR1, TCTA, VIM, WNT5A, YBX1]
organelle localization	22	[ACTR3, BICD2, CDH3, CHMP5, CPLX2, CTNNB1, EZR, HNRNPU, KIF22, KIF2C, KIT, LAMP1, NR4A3, PAFAH1B1, RAB11A, RAB15, RAP1B, RIMS2, UBA52, UBB, UBE2B, YWHAZ]
embryonic morphogenesis	22	[BCL2L11, CFL1, CITED2, CTNNB1, DLX5, EFNA1, EIF4A3, ELF5, GATA3, GPI, HAND2, INHBA, INSIG2, LMO4, NR4A3, OSR1, PRRX1, RACK1, RPL38, RTF1, SOD1, WNT5A]
transcription factor activity, transcription factor binding	22	[ANKRD2, ARL2BP, BHLHE41, CITED2, CNOT7, CTNNB1, DNAJB1, FBP1, GATA3, GPS2, HDGF, HNRNPU, HSPA1A, JUN, LPIN1, LPXN, NACA, NCOR1, PPARGC1A, PRRX1, RTF1, TAF10]
embryonic morphogenesis	22	[BCL2L11, CFL1, CITED2, CTNNB1, DLX5, EFNA1, EIF4A3, ELF5, GATA3, GPI, HAND2, INHBA, INSIG2, LMO4, NR4A3, OSR1, PRRX1, RACK1, RPL38, RTF1, SOD1, WNT5A]
ncRNA processing	22	[CDKAL1, EIF4A3, ELP5, KLHDC3, NOP10, NSUN4, RPL10A, RPL11, RPL14, RPL26, RPL35, RPL36, RPL7, RPS16, RPS17, RPS28, RPS6, RPS7, RPS8, RPSA, THUMPD1, UTP18]
organelle localization	22	[ACTR3, BICD2, CDH3, CHMP5, CPLX2, CTNNB1, EZR, HNRNPU, KIF22, KIF2C, KIT, LAMP1, NR4A3, PAFAH1B1, RAB11A, RAB15, RAP1B, RIMS2, UBA52, UBB, UBE2B, YWHAZ]
ncRNA processing	22	[CDKAL1, EIF4A3, ELP5, KLHDC3, NOP10, NSUN4, RPL10A, RPL11, RPL14, RPL26, RPL35, RPL36, RPL7, RPS16, RPS17, RPS28, RPS6, RPS7, RPS8, RPSA, THUMPD1, UTP18]
response to lipid	22	[AKIRIN2, CTNNB1, DDX5, EIF4E, FDX1, FKBP4, HMGB1, HNRNPU, LANCL2, LBH, NR4A3, OSR1, PABPN1, PAK1, PAQR5, PELI1, PTGES3, RHOA, S100A14, TGFB2, TNFRSF21, WNT5A]
transcription factor activity, transcription factor binding	22	[ANKRD2, ARL2BP, BHLHE41, CITED2, CNOT7, CTNNB1, DNAJB1, FBP1, GATA3, GPS2, HDGF, HNRNPU, HSPA1A, JUN, LPIN1, LPXN, NACA, NCOR1, PPARGC1A, PRRX1, RTF1, TAF10]
neuron projection morphogenesis	22	[CFL1, CTNNB1, DLX5, DPYSL2, EFNA1, ELAVL4, FOXP1, GAP43, GATA3, KIF5C, NKX2-1, NR4A3, NRN1, PAFAH1B1, PAK1, RAB11A, RIMS2, RPL24, STMN1, UBA52, UBB, WNT5A]
embryonic morphogenesis	22	[BCL2L11, CFL1, CITED2, CTNNB1, DLX5, EFNA1, EIF4A3, ELF5, GATA3, GPI, HAND2, INHBA, INSIG2, LMO4, NR4A3, OSR1, PRRX1, RACK1, RPL38, RTF1, SOD1, WNT5A]
transcription factor activity, transcription factor binding	22	[ANKRD2, ARL2BP, BHLHE41, CITED2, CNOT7, CTNNB1, DNAJB1, FBP1, GATA3, GPS2, HDGF, HNRNPU, HSPA1A, JUN, LPIN1, LPXN, NACA, NCOR1, PPARGC1A, PRRX1, RTF1, TAF10]
negative regulation of cell differentiation	22	[ANKRD2, BAG5, BHLHE41, CTNNB1, EFNA1, EIF4E, ELF5, FKBP4, FOXP1, GATA3, GPS2, HAND2, HMGB1, HNRNPU, LBH, MEIS1, NKX2-1, OSR1, TCTA, VIM, WNT5A, YBX1]
embryonic morphogenesis	22	[BCL2L11, CFL1, CITED2, CTNNB1, DLX5, EFNA1, EIF4A3, ELF5, GATA3, GPI, HAND2, INHBA, INSIG2, LMO4, NR4A3, OSR1, PRRX1, RACK1, RPL38, RTF1, SOD1, WNT5A]
organelle localization	22	[ACTR3, BICD2, CDH3, CHMP5, CPLX2, CTNNB1, EZR, HNRNPU, KIF22, KIF2C, KIT, LAMP1, NR4A3, PAFAH1B1, RAB11A, RAB15, RAP1B, RIMS2, UBA52, UBB, UBE2B, YWHAZ]
embryonic morphogenesis	22	[BCL2L11, CFL1, CITED2, CTNNB1, DLX5, EFNA1, EIF4A3, ELF5, GATA3, GPI, HAND2, INHBA, INSIG2, LMO4, NR4A3, OSR1, PRRX1, RACK1, RPL38, RTF1, SOD1, WNT5A]
negative regulation of cell differentiation	22	[ANKRD2, BAG5, BHLHE41, CTNNB1, EFNA1, EIF4E, ELF5, FKBP4, FOXP1, GATA3, GPS2, HAND2, HMGB1, HNRNPU, LBH, MEIS1, NKX2-1, OSR1, TCTA, VIM, WNT5A, YBX1]
negative regulation of cellular component organization	22	[BAG5, CAPZA2, CAPZA3, CAPZB, DNAJA4, DNAJB8, EFNA1, FKBP4, H3F3A, HMGB1, HNRNPU, LGALS3, LMO4, MTPN, RACK1, RAD21, RDX, RPL13A, STMN1, UBE2B, VIM, WNT5A]
cell morphogenesis involved in differentiation	22	[ARPC2, CFL1, CTNNB1, DLX5, DPYSL2, EFNA1, ELAVL4, FOXP1, GAP43, GATA3, KIF5C, NKX2-1, NR4A3, PAFAH1B1, PAK1, RAB11A, RAC1, RPL24, S100A10, SOD1, STMN1, WNT5A]
neuron projection morphogenesis	22	[CFL1, CTNNB1, DLX5, DPYSL2, EFNA1, ELAVL4, FOXP1, GAP43, GATA3, KIF5C, NKX2-1, NR4A3, NRN1, PAFAH1B1, PAK1, RAB11A, RIMS2, RPL24, STMN1, UBA52, UBB, WNT5A]
ncRNA processing	22	[CDKAL1, EIF4A3, ELP5, KLHDC3, NOP10, NSUN4, RPL10A, RPL11, RPL14, RPL26, RPL35, RPL36, RPL7, RPS16, RPS17, RPS28, RPS6, RPS7, RPS8, RPSA, THUMPD1, UTP18]
actin filament organization	22	[ACTR3, ARF1, ARPC1A, ARPC2, ARPC4, CAPZA2, CAPZA3, CAPZB, CFL1, EZR, MTPN, PAK1, PFN1, PHACTR1, RAC1, RDX, RHOA, S100A10, STMN1, TMSB10, TMSB4X, TPM3]
organelle localization	22	[ACTR3, BICD2, CDH3, CHMP5, CPLX2, CTNNB1, EZR, HNRNPU, KIF22, KIF2C, KIT, LAMP1, NR4A3, PAFAH1B1, RAB11A, RAB15, RAP1B, RIMS2, UBA52, UBB, UBE2B, YWHAZ]
negative regulation of cell differentiation	22	[ANKRD2, BAG5, BHLHE41, CTNNB1, EFNA1, EIF4E, ELF5, FKBP4, FOXP1, GATA3, GPS2, HAND2, HMGB1, HNRNPU, LBH, MEIS1, NKX2-1, OSR1, TCTA, VIM, WNT5A, YBX1]
cell morphogenesis involved in differentiation	22	[ARPC2, CFL1, CTNNB1, DLX5, DPYSL2, EFNA1, ELAVL4, FOXP1, GAP43, GATA3, KIF5C, NKX2-1, NR4A3, PAFAH1B1, PAK1, RAB11A, RAC1, RPL24, S100A10, SOD1, STMN1, WNT5A]
neuron projection morphogenesis	22	[CFL1, CTNNB1, DLX5, DPYSL2, EFNA1, ELAVL4, FOXP1, GAP43, GATA3, KIF5C, NKX2-1, NR4A3, NRN1, PAFAH1B1, PAK1, RAB11A, RIMS2, RPL24, STMN1, UBA52, UBB, WNT5A]
cofactor metabolic process	22	[AHCYL2, ALDH5A1, ASPDH, COQ10B, EEF1G, ENO1, FBP1, GAPDH, GAPDHS, GPI, GSTO2, MAT2A, NCOR1, PDHA2, PGAM2, PKM, QDPR, SLC25A39, SOD1, SUCLG2, THTPA, TPI1]
negative regulation of cellular component organization	22	[BAG5, CAPZA2, CAPZA3, CAPZB, DNAJA4, DNAJB8, EFNA1, FKBP4, H3F3A, HMGB1, HNRNPU, LGALS3, LMO4, MTPN, RACK1, RAD21, RDX, RPL13A, STMN1, UBE2B, VIM, WNT5A]
actin filament organization	22	[ACTR3, ARF1, ARPC1A, ARPC2, ARPC4, CAPZA2, CAPZA3, CAPZB, CFL1, EZR, MTPN, PAK1, PFN1, PHACTR1, RAC1, RDX, RHOA, S100A10, STMN1, TMSB10, TMSB4X, TPM3]
embryonic morphogenesis	22	[BCL2L11, CFL1, CITED2, CTNNB1, DLX5, EFNA1, EIF4A3, ELF5, GATA3, GPI, HAND2, INHBA, INSIG2, LMO4, NR4A3, OSR1, PRRX1, RACK1, RPL38, RTF1, SOD1, WNT5A]
establishment of organelle localization	21	[ACTR3, BICD2, CDH3, CHMP5, CPLX2, CTNNB1, EZR, HNRNPU, KIF22, KIF2C, KIT, LAMP1, NR4A3, PAFAH1B1, RAB11A, RAP1B, RIMS2, UBA52, UBB, UBE2B, YWHAZ]
small ribosomal subunit	21	[FAU, RPS11, RPS15, RPS15A, RPS16, RPS17, RPS18, RPS19, RPS2, RPS20, RPS23, RPS26, RPS28, RPS3, RPS5, RPS6, RPS7, RPS8, RPS9, RPSA, UBA52]
cytosolic small ribosomal subunit	21	[FAU, RPS11, RPS15, RPS15A, RPS16, RPS17, RPS18, RPS19, RPS2, RPS20, RPS23, RPS26, RPS28, RPS3, RPS5, RPS6, RPS7, RPS8, RPS9, RPSA, UBA52]
small ribosomal subunit	21	[FAU, RPS11, RPS15, RPS15A, RPS16, RPS17, RPS18, RPS19, RPS2, RPS20, RPS23, RPS26, RPS28, RPS3, RPS5, RPS6, RPS7, RPS8, RPS9, RPSA, UBA52]
cytosolic small ribosomal subunit	21	[FAU, RPS11, RPS15, RPS15A, RPS16, RPS17, RPS18, RPS19, RPS2, RPS20, RPS23, RPS26, RPS28, RPS3, RPS5, RPS6, RPS7, RPS8, RPS9, RPSA, UBA52]
nuclear chromatin	21	[ACTB, CHD4, CITED2, CTNNB1, DLX5, GATA3, H2AFJ, H3F3A, HAND2, HMGB1, HNRNPK, JUN, KLHDC3, MPHOSPH8, NCOR1, NPM2, RUVBL1, SWI5, TNP1, TNP2, UBE2B]
establishment of organelle localization	21	[ACTR3, BICD2, CDH3, CHMP5, CPLX2, CTNNB1, EZR, HNRNPU, KIF22, KIF2C, KIT, LAMP1, NR4A3, PAFAH1B1, RAB11A, RAP1B, RIMS2, UBA52, UBB, UBE2B, YWHAZ]
establishment of organelle localization	21	[ACTR3, BICD2, CDH3, CHMP5, CPLX2, CTNNB1, EZR, HNRNPU, KIF22, KIF2C, KIT, LAMP1, NR4A3, PAFAH1B1, RAB11A, RAP1B, RIMS2, UBA52, UBB, UBE2B, YWHAZ]
nuclear chromatin	21	[ACTB, CHD4, CITED2, CTNNB1, DLX5, GATA3, H2AFJ, H3F3A, HAND2, HMGB1, HNRNPK, JUN, KLHDC3, MPHOSPH8, NCOR1, NPM2, RUVBL1, SWI5, TNP1, TNP2, UBE2B]
actin cytoskeleton	21	[ACTB, ACTG1, ACTR3, ARPC1A, ARPC2, ARPC4, CAPZA2, CAPZA3, CAPZB, CFL1, DYNLL2, EZR, GABARAP, HNRNPK, LANCL2, LPXN, MTPN, MYL12A, RAC1, RDX, TPM3]
small ribosomal subunit	21	[FAU, RPS11, RPS15, RPS15A, RPS16, RPS17, RPS18, RPS19, RPS2, RPS20, RPS23, RPS26, RPS28, RPS3, RPS5, RPS6, RPS7, RPS8, RPS9, RPSA, UBA52]
rRNA metabolic process	21	[DEDD, EIF4A3, KLHDC3, NOP10, NSUN4, RPL10A, RPL11, RPL14, RPL26, RPL35, RPL36, RPL7, RPS16, RPS17, RPS28, RPS6, RPS7, RPS8, RPSA, SPIN1, UTP18]
cytosolic small ribosomal subunit	21	[FAU, RPS11, RPS15, RPS15A, RPS16, RPS17, RPS18, RPS19, RPS2, RPS20, RPS23, RPS26, RPS28, RPS3, RPS5, RPS6, RPS7, RPS8, RPS9, RPSA, UBA52]
establishment of organelle localization	21	[ACTR3, BICD2, CDH3, CHMP5, CPLX2, CTNNB1, EZR, HNRNPU, KIF22, KIF2C, KIT, LAMP1, NR4A3, PAFAH1B1, RAB11A, RAP1B, RIMS2, UBA52, UBB, UBE2B, YWHAZ]
rRNA metabolic process	21	[DEDD, EIF4A3, KLHDC3, NOP10, NSUN4, RPL10A, RPL11, RPL14, RPL26, RPL35, RPL36, RPL7, RPS16, RPS17, RPS28, RPS6, RPS7, RPS8, RPSA, SPIN1, UTP18]
regulation of cell projection organization	21	[ARPC2, BAG5, CAPZB, CD44, CFL1, DPYSL2, EFNA1, EZR, FKBP1A, FKBP4, GAP43, GATA3, PAFAH1B1, PAK1, PRRX1, RAB11A, RAC1, RDX, RIMS2, VIM, WNT5A]
regulation of plasma membrane bounded cell projection organization	21	[ARPC2, BAG5, CAPZB, CD44, CFL1, DPYSL2, EFNA1, EZR, FKBP1A, FKBP4, GAP43, GATA3, PAFAH1B1, PAK1, PRRX1, RAB11A, RAC1, RDX, RIMS2, VIM, WNT5A]
nuclear chromatin	21	[ACTB, CHD4, CITED2, CTNNB1, DLX5, GATA3, H2AFJ, H3F3A, HAND2, HMGB1, HNRNPK, JUN, KLHDC3, MPHOSPH8, NCOR1, NPM2, RUVBL1, SWI5, TNP1, TNP2, UBE2B]
regulation of cell projection organization	21	[ARPC2, BAG5, CAPZB, CD44, CFL1, DPYSL2, EFNA1, EZR, FKBP1A, FKBP4, GAP43, GATA3, PAFAH1B1, PAK1, PRRX1, RAB11A, RAC1, RDX, RIMS2, VIM, WNT5A]
regulation of plasma membrane bounded cell projection organization	21	[ARPC2, BAG5, CAPZB, CD44, CFL1, DPYSL2, EFNA1, EZR, FKBP1A, FKBP4, GAP43, GATA3, PAFAH1B1, PAK1, PRRX1, RAB11A, RAC1, RDX, RIMS2, VIM, WNT5A]
actin cytoskeleton	21	[ACTB, ACTG1, ACTR3, ARPC1A, ARPC2, ARPC4, CAPZA2, CAPZA3, CAPZB, CFL1, DYNLL2, EZR, GABARAP, HNRNPK, LANCL2, LPXN, MTPN, MYL12A, RAC1, RDX, TPM3]
establishment of organelle localization	21	[ACTR3, BICD2, CDH3, CHMP5, CPLX2, CTNNB1, EZR, HNRNPU, KIF22, KIF2C, KIT, LAMP1, NR4A3, PAFAH1B1, RAB11A, RAP1B, RIMS2, UBA52, UBB, UBE2B, YWHAZ]
regulation of cell projection organization	21	[ARPC2, BAG5, CAPZB, CD44, CFL1, DPYSL2, EFNA1, EZR, FKBP1A, FKBP4, GAP43, GATA3, PAFAH1B1, PAK1, PRRX1, RAB11A, RAC1, RDX, RIMS2, VIM, WNT5A]
regulation of plasma membrane bounded cell projection organization	21	[ARPC2, BAG5, CAPZB, CD44, CFL1, DPYSL2, EFNA1, EZR, FKBP1A, FKBP4, GAP43, GATA3, PAFAH1B1, PAK1, PRRX1, RAB11A, RAC1, RDX, RIMS2, VIM, WNT5A]
regulation of cell projection organization	21	[ARPC2, BAG5, CAPZB, CD44, CFL1, DPYSL2, EFNA1, EZR, FKBP1A, FKBP4, GAP43, GATA3, PAFAH1B1, PAK1, PRRX1, RAB11A, RAC1, RDX, RIMS2, VIM, WNT5A]
regulation of plasma membrane bounded cell projection organization	21	[ARPC2, BAG5, CAPZB, CD44, CFL1, DPYSL2, EFNA1, EZR, FKBP1A, FKBP4, GAP43, GATA3, PAFAH1B1, PAK1, PRRX1, RAB11A, RAC1, RDX, RIMS2, VIM, WNT5A]
small ribosomal subunit	21	[FAU, RPS11, RPS15, RPS15A, RPS16, RPS17, RPS18, RPS19, RPS2, RPS20, RPS23, RPS26, RPS28, RPS3, RPS5, RPS6, RPS7, RPS8, RPS9, RPSA, UBA52]
rRNA metabolic process	21	[DEDD, EIF4A3, KLHDC3, NOP10, NSUN4, RPL10A, RPL11, RPL14, RPL26, RPL35, RPL36, RPL7, RPS16, RPS17, RPS28, RPS6, RPS7, RPS8, RPSA, SPIN1, UTP18]
cytosolic small ribosomal subunit	21	[FAU, RPS11, RPS15, RPS15A, RPS16, RPS17, RPS18, RPS19, RPS2, RPS20, RPS23, RPS26, RPS28, RPS3, RPS5, RPS6, RPS7, RPS8, RPS9, RPSA, UBA52]
actin cytoskeleton	21	[ACTB, ACTG1, ACTR3, ARPC1A, ARPC2, ARPC4, CAPZA2, CAPZA3, CAPZB, CFL1, DYNLL2, EZR, GABARAP, HNRNPK, LANCL2, LPXN, MTPN, MYL12A, RAC1, RDX, TPM3]
establishment of organelle localization	21	[ACTR3, BICD2, CDH3, CHMP5, CPLX2, CTNNB1, EZR, HNRNPU, KIF22, KIF2C, KIT, LAMP1, NR4A3, PAFAH1B1, RAB11A, RAP1B, RIMS2, UBA52, UBB, UBE2B, YWHAZ]
regulation of cell projection organization	21	[ARPC2, BAG5, CAPZB, CD44, CFL1, DPYSL2, EFNA1, EZR, FKBP1A, FKBP4, GAP43, GATA3, PAFAH1B1, PAK1, PRRX1, RAB11A, RAC1, RDX, RIMS2, VIM, WNT5A]
regulation of plasma membrane bounded cell projection organization	21	[ARPC2, BAG5, CAPZB, CD44, CFL1, DPYSL2, EFNA1, EZR, FKBP1A, FKBP4, GAP43, GATA3, PAFAH1B1, PAK1, PRRX1, RAB11A, RAC1, RDX, RIMS2, VIM, WNT5A]
regulation of cell projection organization	21	[ARPC2, BAG5, CAPZB, CD44, CFL1, DPYSL2, EFNA1, EZR, FKBP1A, FKBP4, GAP43, GATA3, PAFAH1B1, PAK1, PRRX1, RAB11A, RAC1, RDX, RIMS2, VIM, WNT5A]
regulation of plasma membrane bounded cell projection organization	21	[ARPC2, BAG5, CAPZB, CD44, CFL1, DPYSL2, EFNA1, EZR, FKBP1A, FKBP4, GAP43, GATA3, PAFAH1B1, PAK1, PRRX1, RAB11A, RAC1, RDX, RIMS2, VIM, WNT5A]
actin cytoskeleton	21	[ACTB, ACTG1, ACTR3, ARPC1A, ARPC2, ARPC4, CAPZA2, CAPZA3, CAPZB, CFL1, DYNLL2, EZR, GABARAP, HNRNPK, LANCL2, LPXN, MTPN, MYL12A, RAC1, RDX, TPM3]
cell adhesion molecule binding	20	[BZW1, CHMP5, CTNNB1, EEF1G, EIF3E, EIF5, EZR, HNRNPK, PCBP1, RACK1, RDX, RPL14, RPL24, RPL29, RUVBL1, SERBP1, TAGLN2, TES, YWHAE, YWHAZ]
cadherin binding	20	[BZW1, CHMP5, CTNNB1, EEF1G, EIF3E, EIF5, EZR, HNRNPK, PCBP1, RACK1, RDX, RPL14, RPL24, RPL29, RUVBL1, SERBP1, TAGLN2, TES, YWHAE, YWHAZ]
positive regulation of transferase activity	20	[CAB39, CCNY, CTNNB1, DCUN1D1, DCUN1D5, EFNA1, HMGB1, HSP90AA1, KIT, LMO4, PABPN1, PAK1, PTGES3, RHOA, RPLP1, RPS3, SOD1, TGFB2, UBE2N, WNT5A]
centrosome	20	[ARL2BP, ATF4, BICD2, CCDC77, CEP41, CETN1, CHD4, CTNNB1, DCAF12, DYNLL1, DYNLL2, HNRNPU, HSPA1A, KIF2C, ODF2, PAFAH1B1, PCNT, RAB11A, RPS7, SLF1]
regulation of cell adhesion	20	[ARPC2, CD44, CITED2, CTNNB1, EFNA1, GATA3, HAS2, HMGB1, LGALS3, LPXN, NR4A3, PELI1, PPP1CB, RAC1, RDX, RPS3, S100A10, TGFB2, TNFRSF21, WNT5A]
response to organic cyclic compound	20	[ATF4, CTNNB1, DDX5, EIF4E, EZR, FDX1, FKBP1A, FKBP4, HMGB1, HNRNPU, JUN, LBH, NCOR1, NR4A3, PAK1, PAQR5, PELI1, PTGES3, RAP1B, TGFB2]
mitochondrion organization	20	[APOPT1, BCL2L11, CHCHD2, COX7A2L, FUNDC2, GABARAP, HSP90AA1, HSPA1L, MAP1LC3A, MLLT11, NDUFA5, NDUFB2, POLG2, PPARGC1A, RUVBL1, SDHAF3, SLC25A6, SPATA18, TFAM, UBL4B]
cilium	20	[AK1, ARL2BP, CABS1, CABYR, CEP41, CETN1, EZR, GABARAP, GPI, KIF5C, ODF1, ODF2, PAFAH1B1, RAB15, ROPN1, SORD, SPA17, SPATA6, TCP11, TEKT1]
regulation of anatomical structure size	20	[ACTR3, ARF1, ARPC1A, ARPC2, ARPC4, CAPZA2, CAPZA3, CAPZB, CFL1, DPYSL2, EZR, LAMTOR4, MTPN, PFN1, RAB11A, RAC1, RDX, RHOA, SOD1, WNT5A]
positive regulation of transferase activity	20	[CAB39, CCNY, CTNNB1, DCUN1D1, DCUN1D5, EFNA1, HMGB1, HSP90AA1, KIT, LMO4, PABPN1, PAK1, PTGES3, RHOA, RPLP1, RPS3, SOD1, TGFB2, UBE2N, WNT5A]
regulation of cell adhesion	20	[ARPC2, CD44, CITED2, CTNNB1, EFNA1, GATA3, HAS2, HMGB1, LGALS3, LPXN, NR4A3, PELI1, PPP1CB, RAC1, RDX, RPS3, S100A10, TGFB2, TNFRSF21, WNT5A]
regulation of cell adhesion	20	[ARPC2, CD44, CITED2, CTNNB1, EFNA1, GATA3, HAS2, HMGB1, LGALS3, LPXN, NR4A3, PELI1, PPP1CB, RAC1, RDX, RPS3, S100A10, TGFB2, TNFRSF21, WNT5A]
regulation of apoptotic signaling pathway	20	[ANKRD2, APOPT1, BAG5, BCL2L11, CD44, CTNNB1, GSDME, HNRNPK, HSPB1, INHBA, LGALS3, MLLT11, RACK1, RPL11, RPL26, RPS3, RPS7, UBA52, UBB, YBX3]
centrosome	20	[ARL2BP, ATF4, BICD2, CCDC77, CEP41, CETN1, CHD4, CTNNB1, DCAF12, DYNLL1, DYNLL2, HNRNPU, HSPA1A, KIF2C, ODF2, PAFAH1B1, PCNT, RAB11A, RPS7, SLF1]
regulation of anatomical structure size	20	[ACTR3, ARF1, ARPC1A, ARPC2, ARPC4, CAPZA2, CAPZA3, CAPZB, CFL1, DPYSL2, EZR, LAMTOR4, MTPN, PFN1, RAB11A, RAC1, RDX, RHOA, SOD1, WNT5A]
positive regulation of transferase activity	20	[CAB39, CCNY, CTNNB1, DCUN1D1, DCUN1D5, EFNA1, HMGB1, HSP90AA1, KIT, LMO4, PABPN1, PAK1, PTGES3, RHOA, RPLP1, RPS3, SOD1, TGFB2, UBE2N, WNT5A]
intrinsic apoptotic signaling pathway	20	[ANKRD2, APOPT1, ATF4, BAG5, BCL2L11, CD44, DDX5, GSDME, HNRNPK, HSPB1, MLLT11, POLB, RACK1, RPL11, RPL26, RPS3, RPS7, UBA52, UBB, YBX3]
regulation of apoptotic signaling pathway	20	[ANKRD2, APOPT1, BAG5, BCL2L11, CD44, CTNNB1, GSDME, HNRNPK, HSPB1, INHBA, LGALS3, MLLT11, RACK1, RPL11, RPL26, RPS3, RPS7, UBA52, UBB, YBX3]
positive regulation of transferase activity	20	[CAB39, CCNY, CTNNB1, DCUN1D1, DCUN1D5, EFNA1, HMGB1, HSP90AA1, KIT, LMO4, PABPN1, PAK1, PTGES3, RHOA, RPLP1, RPS3, SOD1, TGFB2, UBE2N, WNT5A]
intrinsic apoptotic signaling pathway	20	[ANKRD2, APOPT1, ATF4, BAG5, BCL2L11, CD44, DDX5, GSDME, HNRNPK, HSPB1, MLLT11, POLB, RACK1, RPL11, RPL26, RPS3, RPS7, UBA52, UBB, YBX3]
regulation of apoptotic signaling pathway	20	[ANKRD2, APOPT1, BAG5, BCL2L11, CD44, CTNNB1, GSDME, HNRNPK, HSPB1, INHBA, LGALS3, MLLT11, RACK1, RPL11, RPL26, RPS3, RPS7, UBA52, UBB, YBX3]
regulation of cell adhesion	20	[ARPC2, CD44, CITED2, CTNNB1, EFNA1, GATA3, HAS2, HMGB1, LGALS3, LPXN, NR4A3, PELI1, PPP1CB, RAC1, RDX, RPS3, S100A10, TGFB2, TNFRSF21, WNT5A]
regulation of anatomical structure size	20	[ACTR3, ARF1, ARPC1A, ARPC2, ARPC4, CAPZA2, CAPZA3, CAPZB, CFL1, DPYSL2, EZR, LAMTOR4, MTPN, PFN1, RAB11A, RAC1, RDX, RHOA, SOD1, WNT5A]
regulation of cell adhesion	20	[ARPC2, CD44, CITED2, CTNNB1, EFNA1, GATA3, HAS2, HMGB1, LGALS3, LPXN, NR4A3, PELI1, PPP1CB, RAC1, RDX, RPS3, S100A10, TGFB2, TNFRSF21, WNT5A]
regulation of anatomical structure size	20	[ACTR3, ARF1, ARPC1A, ARPC2, ARPC4, CAPZA2, CAPZA3, CAPZB, CFL1, DPYSL2, EZR, LAMTOR4, MTPN, PFN1, RAB11A, RAC1, RDX, RHOA, SOD1, WNT5A]
regulation of cell adhesion	20	[ARPC2, CD44, CITED2, CTNNB1, EFNA1, GATA3, HAS2, HMGB1, LGALS3, LPXN, NR4A3, PELI1, PPP1CB, RAC1, RDX, RPS3, S100A10, TGFB2, TNFRSF21, WNT5A]
positive regulation of transferase activity	20	[CAB39, CCNY, CTNNB1, DCUN1D1, DCUN1D5, EFNA1, HMGB1, HSP90AA1, KIT, LMO4, PABPN1, PAK1, PTGES3, RHOA, RPLP1, RPS3, SOD1, TGFB2, UBE2N, WNT5A]
nuclear speck	19	[CDC34, CHD5, CNOT7, CWC25, DAZAP2, EIF4A3, GPATCH2, HABP4, HNRNPU, KIF22, LPXN, PABPN1, PCBP1, PHF7, POLR2D, SLC2A4RG, SLU7, SRSF3, SUMO1]
muscle structure development	19	[ACTG1, ANKRD2, BHLHE41, BTG1, CAPZB, CHD2, CITED2, CTNNB1, FKBP1A, FOXP1, FXR1, H3F3A, HNRNPU, JPH1, KIT, SERP1, WNT5A, YBX1, YBX3]
skeletal system development	19	[CD44, CITED2, COL13A1, CREB3L2, CTNNB1, DLX5, EIF4A3, HAND2, HAS2, INSIG2, KIT, MEIS1, MEX3C, OSR1, PAFAH1B1, PRRX1, RPL38, SERP1, WNT5A]
muscle structure development	19	[ACTG1, ANKRD2, BHLHE41, BTG1, CAPZB, CHD2, CITED2, CTNNB1, FKBP1A, FOXP1, FXR1, H3F3A, HNRNPU, JPH1, KIT, SERP1, WNT5A, YBX1, YBX3]
rRNA processing	19	[EIF4A3, KLHDC3, NOP10, NSUN4, RPL10A, RPL11, RPL14, RPL26, RPL35, RPL36, RPL7, RPS16, RPS17, RPS28, RPS6, RPS7, RPS8, RPSA, UTP18]
microtubule	19	[DPYSL2, DYNLL1, DYNLL2, FKBP4, GABARAP, HNRNPU, KIF22, KIF2C, KIF5C, MAP1LC3A, NCOR1, ODF2, PAFAH1B1, POLB, RAB11A, SERP1, STMN1, TEKT1, TUBB4B]
transcription cofactor activity	19	[ANKRD2, ARL2BP, BHLHE41, CITED2, CTNNB1, DNAJB1, GATA3, GPS2, HDGF, HNRNPU, HSPA1A, JUN, LPIN1, LPXN, NACA, NCOR1, PPARGC1A, PRRX1, TAF10]
tubulin binding	19	[BCL2L11, CAPZB, CETN1, DPYSL2, EZR, GABARAP, GAPDH, KIF22, KIF2C, KIF5C, NCALD, PAFAH1B1, POLB, RAB11A, RPS3, STMN1, TPT1, TRIM36, VPS41]
microtubule	19	[DPYSL2, DYNLL1, DYNLL2, FKBP4, GABARAP, HNRNPU, KIF22, KIF2C, KIF5C, MAP1LC3A, NCOR1, ODF2, PAFAH1B1, POLB, RAB11A, SERP1, STMN1, TEKT1, TUBB4B]
negative regulation of phosphorus metabolic process	19	[DUSP14, DYNLL1, EFNA1, EZR, FBP1, FKBP1A, GPATCH2, GPS2, HNRNPU, HSPB1, JUN, NCOR1, PAFAH1B1, PKIG, RACK1, TGFB2, UBE2B, VRK3, YWHAE]
negative regulation of phosphate metabolic process	19	[DUSP14, DYNLL1, EFNA1, EZR, FBP1, FKBP1A, GPATCH2, GPS2, HNRNPU, HSPB1, JUN, NCOR1, PAFAH1B1, PKIG, RACK1, TGFB2, UBE2B, VRK3, YWHAE]
negative regulation of protein modification process	19	[BAG5, CTNNB1, DUSP14, EFNA1, EZR, FKBP1A, GPS2, HSPB1, JUN, NCOR1, PAFAH1B1, PKIG, RACK1, RPL11, RPS3, RPS7, UBE2B, VRK3, YWHAE]
microtubule	19	[DPYSL2, DYNLL1, DYNLL2, FKBP4, GABARAP, HNRNPU, KIF22, KIF2C, KIF5C, MAP1LC3A, NCOR1, ODF2, PAFAH1B1, POLB, RAB11A, SERP1, STMN1, TEKT1, TUBB4B]
regulation of neurogenesis	19	[BAG5, CFL1, CTNNB1, DPYSL2, EFNA1, EIF4E, FKBP1A, FKBP4, GATA3, MEIS1, PAFAH1B1, PAK1, PRRX1, RAB11A, RHOA, RIMS2, TNFRSF21, VIM, WNT5A]
muscle structure development	19	[ACTG1, ANKRD2, BHLHE41, BTG1, CAPZB, CHD2, CITED2, CTNNB1, FKBP1A, FOXP1, FXR1, H3F3A, HNRNPU, JPH1, KIT, SERP1, WNT5A, YBX1, YBX3]
transcription cofactor activity	19	[ANKRD2, ARL2BP, BHLHE41, CITED2, CTNNB1, DNAJB1, GATA3, GPS2, HDGF, HNRNPU, HSPA1A, JUN, LPIN1, LPXN, NACA, NCOR1, PPARGC1A, PRRX1, TAF10]
regulation of cytokine production	19	[AGPAT2, AKIRIN2, ANKRD2, ATF4, CDH3, EZR, GATA3, HMGB1, HSPB1, LSM14A, NR4A3, PELI1, RAC1, RPS3, SOD1, TGFB2, TNFRSF21, UBE2J1, WNT5A]
regulation of protein catabolic process	19	[ARIH1, BAG5, DEDD, EFNA1, EZR, MGC137055, OAZ1, OAZ3, PSME1, PSMF1, RACK1, RDX, RPL11, RPS7, SUMO1, UBA52, UBB, UBE2J1, WNT5A]
rRNA processing	19	[EIF4A3, KLHDC3, NOP10, NSUN4, RPL10A, RPL11, RPL14, RPL26, RPL35, RPL36, RPL7, RPS16, RPS17, RPS28, RPS6, RPS7, RPS8, RPSA, UTP18]
negative regulation of protein modification process	19	[BAG5, CTNNB1, DUSP14, EFNA1, EZR, FKBP1A, GPS2, HSPB1, JUN, NCOR1, PAFAH1B1, PKIG, RACK1, RPL11, RPS3, RPS7, UBE2B, VRK3, YWHAE]
mRNA processing	19	[CTNNBL1, DDX5, EIF4A3, HNRNPK, HNRNPL, HNRNPU, KHDRBS3, LSM2, NOVA1, PABPC1, PABPN1, POLR2D, SF3B6, SLU7, SRPK2, SRSF3, SRSF9, TRA2B, YBX1]
RNA splicing	19	[CTNNBL1, DDX5, EIF4A3, HABP4, HNRNPH1, HNRNPK, HNRNPL, HNRNPU, KHDRBS3, LSM2, NOVA1, PABPC1, SF3B6, SLU7, SRPK2, SRSF3, SRSF9, TRA2B, YBX1]
rRNA processing	19	[EIF4A3, KLHDC3, NOP10, NSUN4, RPL10A, RPL11, RPL14, RPL26, RPL35, RPL36, RPL7, RPS16, RPS17, RPS28, RPS6, RPS7, RPS8, RPSA, UTP18]
transcription cofactor activity	19	[ANKRD2, ARL2BP, BHLHE41, CITED2, CTNNB1, DNAJB1, GATA3, GPS2, HDGF, HNRNPU, HSPA1A, JUN, LPIN1, LPXN, NACA, NCOR1, PPARGC1A, PRRX1, TAF10]
regulation of cellular component size	19	[ACTR3, ARF1, ARPC1A, ARPC2, ARPC4, CAPZA2, CAPZA3, CAPZB, CFL1, DPYSL2, EZR, LAMTOR4, MTPN, PFN1, RAB11A, RAC1, RDX, RHOA, WNT5A]
taxis	19	[CCL14, DLX5, DPYSL2, EFNA1, FOXP1, GAP43, GATA3, HMGB1, HSPB1, KIF5C, KIT, LGALS3, NKX2-1, NR4A3, RAC1, RHOA, RPL24, S100A14, WNT5A]
chemotaxis	19	[CCL14, DLX5, DPYSL2, EFNA1, FOXP1, GAP43, GATA3, HMGB1, HSPB1, KIF5C, KIT, LGALS3, NKX2-1, NR4A3, RAC1, RHOA, RPL24, S100A14, WNT5A]
negative regulation of protein modification process	19	[BAG5, CTNNB1, DUSP14, EFNA1, EZR, FKBP1A, GPS2, HSPB1, JUN, NCOR1, PAFAH1B1, PKIG, RACK1, RPL11, RPS3, RPS7, UBE2B, VRK3, YWHAE]
regulation of neurogenesis	19	[BAG5, CFL1, CTNNB1, DPYSL2, EFNA1, EIF4E, FKBP1A, FKBP4, GATA3, MEIS1, PAFAH1B1, PAK1, PRRX1, RAB11A, RHOA, RIMS2, TNFRSF21, VIM, WNT5A]
tubulin binding	19	[BCL2L11, CAPZB, CETN1, DPYSL2, EZR, GABARAP, GAPDH, KIF22, KIF2C, KIF5C, NCALD, PAFAH1B1, POLB, RAB11A, RPS3, STMN1, TPT1, TRIM36, VPS41]
microtubule	19	[DPYSL2, DYNLL1, DYNLL2, FKBP4, GABARAP, HNRNPU, KIF22, KIF2C, KIF5C, MAP1LC3A, NCOR1, ODF2, PAFAH1B1, POLB, RAB11A, SERP1, STMN1, TEKT1, TUBB4B]
regulation of protein catabolic process	19	[ARIH1, BAG5, DEDD, EFNA1, EZR, MGC137055, OAZ1, OAZ3, PSME1, PSMF1, RACK1, RDX, RPL11, RPS7, SUMO1, UBA52, UBB, UBE2J1, WNT5A]
regulation of neurogenesis	19	[BAG5, CFL1, CTNNB1, DPYSL2, EFNA1, EIF4E, FKBP1A, FKBP4, GATA3, MEIS1, PAFAH1B1, PAK1, PRRX1, RAB11A, RHOA, RIMS2, TNFRSF21, VIM, WNT5A]
transcription cofactor activity	19	[ANKRD2, ARL2BP, BHLHE41, CITED2, CTNNB1, DNAJB1, GATA3, GPS2, HDGF, HNRNPU, HSPA1A, JUN, LPIN1, LPXN, NACA, NCOR1, PPARGC1A, PRRX1, TAF10]
regulation of cellular component size	19	[ACTR3, ARF1, ARPC1A, ARPC2, ARPC4, CAPZA2, CAPZA3, CAPZB, CFL1, DPYSL2, EZR, LAMTOR4, MTPN, PFN1, RAB11A, RAC1, RDX, RHOA, WNT5A]
regulation of actin filament-based process	19	[ACTR3, ARF1, ARPC1A, ARPC2, ARPC4, CAPZA2, CAPZA3, CAPZB, CFL1, MTPN, PAK1, PFN1, PHPT1, RAC1, RDX, RHOA, S100A10, STMN1, SUMO1]
regulation of supramolecular fiber organization	19	[ACTR3, ARF1, ARPC1A, ARPC2, ARPC4, CAPZA2, CAPZA3, CAPZB, CFL1, HSPA1A, MTPN, PAK1, PFN1, RAC1, RDX, RHOA, RPS3, S100A10, STMN1]
tubulin binding	19	[BCL2L11, CAPZB, CETN1, DPYSL2, EZR, GABARAP, GAPDH, KIF22, KIF2C, KIF5C, NCALD, PAFAH1B1, POLB, RAB11A, RPS3, STMN1, TPT1, TRIM36, VPS41]
microtubule	19	[DPYSL2, DYNLL1, DYNLL2, FKBP4, GABARAP, HNRNPU, KIF22, KIF2C, KIF5C, MAP1LC3A, NCOR1, ODF2, PAFAH1B1, POLB, RAB11A, SERP1, STMN1, TEKT1, TUBB4B]
Huntington's disease	19	[CLTA, COX1, COX3, COX4I1, COX7A2, COX7A2L, COX7B, CREB3L2, LOC101902937, LOC782270, MGC148714, NDUFA5, NDUFB2, POLR2D, PPARGC1A, SDHB, SLC25A6, SOD1, TFAM]
regulation of neurogenesis	19	[BAG5, CFL1, CTNNB1, DPYSL2, EFNA1, EIF4E, FKBP1A, FKBP4, GATA3, MEIS1, PAFAH1B1, PAK1, PRRX1, RAB11A, RHOA, RIMS2, TNFRSF21, VIM, WNT5A]
regulation of neurogenesis	19	[BAG5, CFL1, CTNNB1, DPYSL2, EFNA1, EIF4E, FKBP1A, FKBP4, GATA3, MEIS1, PAFAH1B1, PAK1, PRRX1, RAB11A, RHOA, RIMS2, TNFRSF21, VIM, WNT5A]
negative regulation of phosphorus metabolic process	19	[DUSP14, DYNLL1, EFNA1, EZR, FBP1, FKBP1A, GPATCH2, GPS2, HNRNPU, HSPB1, JUN, NCOR1, PAFAH1B1, PKIG, RACK1, TGFB2, UBE2B, VRK3, YWHAE]
negative regulation of phosphate metabolic process	19	[DUSP14, DYNLL1, EFNA1, EZR, FBP1, FKBP1A, GPATCH2, GPS2, HNRNPU, HSPB1, JUN, NCOR1, PAFAH1B1, PKIG, RACK1, TGFB2, UBE2B, VRK3, YWHAE]
negative regulation of protein modification process	19	[BAG5, CTNNB1, DUSP14, EFNA1, EZR, FKBP1A, GPS2, HSPB1, JUN, NCOR1, PAFAH1B1, PKIG, RACK1, RPL11, RPS3, RPS7, UBE2B, VRK3, YWHAE]
rRNA processing	19	[EIF4A3, KLHDC3, NOP10, NSUN4, RPL10A, RPL11, RPL14, RPL26, RPL35, RPL36, RPL7, RPS16, RPS17, RPS28, RPS6, RPS7, RPS8, RPSA, UTP18]
mRNA processing	19	[CTNNBL1, DDX5, EIF4A3, HNRNPK, HNRNPL, HNRNPU, KHDRBS3, LSM2, NOVA1, PABPC1, PABPN1, POLR2D, SF3B6, SLU7, SRPK2, SRSF3, SRSF9, TRA2B, YBX1]
RNA splicing	19	[CTNNBL1, DDX5, EIF4A3, HABP4, HNRNPH1, HNRNPK, HNRNPL, HNRNPU, KHDRBS3, LSM2, NOVA1, PABPC1, SF3B6, SLU7, SRPK2, SRSF3, SRSF9, TRA2B, YBX1]
positive regulation of cellular component biogenesis	19	[ACTR3, ARF1, ARPC1A, ARPC2, ARPC4, BCL2L11, CTNNB1, GTF2F2, HSPA1A, JUN, PAK1, PFN1, RAC1, RACK1, RHOA, RPS3, S100A10, SLF1, SUMO1]
regulation of actin filament-based process	19	[ACTR3, ARF1, ARPC1A, ARPC2, ARPC4, CAPZA2, CAPZA3, CAPZB, CFL1, MTPN, PAK1, PFN1, PHPT1, RAC1, RDX, RHOA, S100A10, STMN1, SUMO1]
regulation of supramolecular fiber organization	19	[ACTR3, ARF1, ARPC1A, ARPC2, ARPC4, CAPZA2, CAPZA3, CAPZB, CFL1, HSPA1A, MTPN, PAK1, PFN1, RAC1, RDX, RHOA, RPS3, S100A10, STMN1]
positive regulation of cellular component biogenesis	19	[ACTR3, ARF1, ARPC1A, ARPC2, ARPC4, BCL2L11, CTNNB1, GTF2F2, HSPA1A, JUN, PAK1, PFN1, RAC1, RACK1, RHOA, RPS3, S100A10, SLF1, SUMO1]
regulation of protein catabolic process	19	[ARIH1, BAG5, DEDD, EFNA1, EZR, MGC137055, OAZ1, OAZ3, PSME1, PSMF1, RACK1, RDX, RPL11, RPS7, SUMO1, UBA52, UBB, UBE2J1, WNT5A]
tubulin binding	19	[BCL2L11, CAPZB, CETN1, DPYSL2, EZR, GABARAP, GAPDH, KIF22, KIF2C, KIF5C, NCALD, PAFAH1B1, POLB, RAB11A, RPS3, STMN1, TPT1, TRIM36, VPS41]
taxis	19	[CCL14, DLX5, DPYSL2, EFNA1, FOXP1, GAP43, GATA3, HMGB1, HSPB1, KIF5C, KIT, LGALS3, NKX2-1, NR4A3, RAC1, RHOA, RPL24, S100A14, WNT5A]
chemotaxis	19	[CCL14, DLX5, DPYSL2, EFNA1, FOXP1, GAP43, GATA3, HMGB1, HSPB1, KIF5C, KIT, LGALS3, NKX2-1, NR4A3, RAC1, RHOA, RPL24, S100A14, WNT5A]
regulation of cellular component size	19	[ACTR3, ARF1, ARPC1A, ARPC2, ARPC4, CAPZA2, CAPZA3, CAPZB, CFL1, DPYSL2, EZR, LAMTOR4, MTPN, PFN1, RAB11A, RAC1, RDX, RHOA, WNT5A]
regulation of neurogenesis	19	[BAG5, CFL1, CTNNB1, DPYSL2, EFNA1, EIF4E, FKBP1A, FKBP4, GATA3, MEIS1, PAFAH1B1, PAK1, PRRX1, RAB11A, RHOA, RIMS2, TNFRSF21, VIM, WNT5A]
monocarboxylic acid metabolic process	19	[ACSBG2, ALDH5A1, ENO1, FBP1, GAPDH, GAPDHS, GPI, INSIG2, LPIN1, LYPLA1, NCOR1, NR4A3, PDHA2, PGAM2, PHGDH, PKM, PPARGC1A, PTGES3, TPI1]
taxis	19	[CCL14, DLX5, DPYSL2, EFNA1, FOXP1, GAP43, GATA3, HMGB1, HSPB1, KIF5C, KIT, LGALS3, NKX2-1, NR4A3, RAC1, RHOA, RPL24, S100A14, WNT5A]
regulation of cytokine production	19	[AGPAT2, AKIRIN2, ANKRD2, ATF4, CDH3, EZR, GATA3, HMGB1, HSPB1, LSM14A, NR4A3, PELI1, RAC1, RPS3, SOD1, TGFB2, TNFRSF21, UBE2J1, WNT5A]
chemotaxis	19	[CCL14, DLX5, DPYSL2, EFNA1, FOXP1, GAP43, GATA3, HMGB1, HSPB1, KIF5C, KIT, LGALS3, NKX2-1, NR4A3, RAC1, RHOA, RPL24, S100A14, WNT5A]
positive regulation of cellular component biogenesis	19	[ACTR3, ARF1, ARPC1A, ARPC2, ARPC4, BCL2L11, CTNNB1, GTF2F2, HSPA1A, JUN, PAK1, PFN1, RAC1, RACK1, RHOA, RPS3, S100A10, SLF1, SUMO1]
regulation of cellular component size	19	[ACTR3, ARF1, ARPC1A, ARPC2, ARPC4, CAPZA2, CAPZA3, CAPZB, CFL1, DPYSL2, EZR, LAMTOR4, MTPN, PFN1, RAB11A, RAC1, RDX, RHOA, WNT5A]
regulation of actin filament-based process	19	[ACTR3, ARF1, ARPC1A, ARPC2, ARPC4, CAPZA2, CAPZA3, CAPZB, CFL1, MTPN, PAK1, PFN1, PHPT1, RAC1, RDX, RHOA, S100A10, STMN1, SUMO1]
actin binding	19	[ACTR3, ARPC1A, ARPC2, ARPC4, CAPZA2, CAPZA3, CAPZB, CFL1, EZR, HNRNPU, LIMCH1, MYL12A, NCALD, PFN1, PHACTR1, RDX, TMSB10, TMSB4X, TPM3]
tubulin binding	19	[BCL2L11, CAPZB, CETN1, DPYSL2, EZR, GABARAP, GAPDH, KIF22, KIF2C, KIF5C, NCALD, PAFAH1B1, POLB, RAB11A, RPS3, STMN1, TPT1, TRIM36, VPS41]
regulation of supramolecular fiber organization	19	[ACTR3, ARF1, ARPC1A, ARPC2, ARPC4, CAPZA2, CAPZA3, CAPZB, CFL1, HSPA1A, MTPN, PAK1, PFN1, RAC1, RDX, RHOA, RPS3, S100A10, STMN1]
taxis	19	[CCL14, DLX5, DPYSL2, EFNA1, FOXP1, GAP43, GATA3, HMGB1, HSPB1, KIF5C, KIT, LGALS3, NKX2-1, NR4A3, RAC1, RHOA, RPL24, S100A14, WNT5A]
regulation of cytokine production	19	[AGPAT2, AKIRIN2, ANKRD2, ATF4, CDH3, EZR, GATA3, HMGB1, HSPB1, LSM14A, NR4A3, PELI1, RAC1, RPS3, SOD1, TGFB2, TNFRSF21, UBE2J1, WNT5A]
chemotaxis	19	[CCL14, DLX5, DPYSL2, EFNA1, FOXP1, GAP43, GATA3, HMGB1, HSPB1, KIF5C, KIT, LGALS3, NKX2-1, NR4A3, RAC1, RHOA, RPL24, S100A14, WNT5A]
skeletal system development	19	[CD44, CITED2, COL13A1, CREB3L2, CTNNB1, DLX5, EIF4A3, HAND2, HAS2, INSIG2, KIT, MEIS1, MEX3C, OSR1, PAFAH1B1, PRRX1, RPL38, SERP1, WNT5A]
regulation of neurogenesis	19	[BAG5, CFL1, CTNNB1, DPYSL2, EFNA1, EIF4E, FKBP1A, FKBP4, GATA3, MEIS1, PAFAH1B1, PAK1, PRRX1, RAB11A, RHOA, RIMS2, TNFRSF21, VIM, WNT5A]
protein heterodimerization activity	18	[ARF1, BCL2L11, BHLHE41, CABYR, CTNNB1, FOXP1, FXR1, H2AFJ, H3F3A, HAND2, HIST1H2BD, JUN, MEIS1, NRN1, PABPN1, PSMF1, TAF12, YWHAE]
coenzyme metabolic process	18	[AHCYL2, ASPDH, COQ10B, ENO1, FBP1, GAPDH, GAPDHS, GPI, GSTO2, MAT2A, NCOR1, PDHA2, PGAM2, PKM, QDPR, SUCLG2, THTPA, TPI1]
cellular component disassembly	18	[CAPZA2, CAPZA3, CAPZB, CFL1, EIF5A, FUNDC2, GABARAP, KIF2C, MAP1LC3A, MTPN, PAFAH1B1, RDX, RETREG1, RUVBL1, SOD1, SPATA18, STMN1, TNP1]
ubiquitin-like protein transferase activity	18	[ARIH1, CDC34, LTN1, MPHOSPH8, PELI1, RNF11, SOD1, TRIM36, UBE2B, UBE2D2, UBE2F, UBE2J1, UBE2M, UBE2N, UBE2Q1, UBE2R2, UBE2V1, ZNRF1]
ubiquitin-protein transferase activity	18	[ARIH1, CDC34, LTN1, MPHOSPH8, PELI1, RNF11, SOD1, TRIM36, UBE2B, UBE2D2, UBE2F, UBE2J1, UBE2M, UBE2N, UBE2Q1, UBE2R2, UBE2V1, ZNRF1]
regulation of cell morphogenesis	18	[ARPC2, CAPZB, CD44, CFL1, CSNK1G2, DPYSL2, EFNA1, EZR, KIT, PAFAH1B1, PAK1, RAB11A, RAC1, RDX, RIMS2, S100A10, VRK3, WNT5A]
regulation of actin cytoskeleton organization	18	[ACTR3, ARF1, ARPC1A, ARPC2, ARPC4, CAPZA2, CAPZA3, CAPZB, CFL1, MTPN, PAK1, PFN1, PHPT1, RAC1, RDX, RHOA, S100A10, STMN1]
ubiquitin-like protein transferase activity	18	[ARIH1, CDC34, LTN1, MPHOSPH8, PELI1, RNF11, SOD1, TRIM36, UBE2B, UBE2D2, UBE2F, UBE2J1, UBE2M, UBE2N, UBE2Q1, UBE2R2, UBE2V1, ZNRF1]
ubiquitin-protein transferase activity	18	[ARIH1, CDC34, LTN1, MPHOSPH8, PELI1, RNF11, SOD1, TRIM36, UBE2B, UBE2D2, UBE2F, UBE2J1, UBE2M, UBE2N, UBE2Q1, UBE2R2, UBE2V1, ZNRF1]
coenzyme metabolic process	18	[AHCYL2, ASPDH, COQ10B, ENO1, FBP1, GAPDH, GAPDHS, GPI, GSTO2, MAT2A, NCOR1, PDHA2, PGAM2, PKM, QDPR, SUCLG2, THTPA, TPI1]
embryonic organ development	18	[CITED2, CTNNB1, DLX5, EFNA1, EIF4A3, GATA3, HAND2, INSIG2, KIT, NR4A3, OSR1, PRRX1, RPL10, RPL38, SOD1, TGFB2, TRA2B, WNT5A]
positive regulation of cellular component movement	18	[ELP5, GATA3, HAS2, HMGB1, HSPB1, JUN, LGALS3, PAK1, PHPT1, RAB11A, RAC1, RACK1, RDX, RHOA, S100A14, STMN1, TGFB2, WNT5A]
positive regulation of cellular component movement	18	[ELP5, GATA3, HAS2, HMGB1, HSPB1, JUN, LGALS3, PAK1, PHPT1, RAB11A, RAC1, RACK1, RDX, RHOA, S100A14, STMN1, TGFB2, WNT5A]
regulation of cell morphogenesis	18	[ARPC2, CAPZB, CD44, CFL1, CSNK1G2, DPYSL2, EFNA1, EZR, KIT, PAFAH1B1, PAK1, RAB11A, RAC1, RDX, RIMS2, S100A10, VRK3, WNT5A]
regulation of cell morphogenesis	18	[ARPC2, CAPZB, CD44, CFL1, CSNK1G2, DPYSL2, EFNA1, EZR, KIT, PAFAH1B1, PAK1, RAB11A, RAC1, RDX, RIMS2, S100A10, VRK3, WNT5A]
cell morphogenesis involved in neuron differentiation	18	[CFL1, DLX5, DPYSL2, EFNA1, ELAVL4, FOXP1, GAP43, GATA3, KIF5C, NKX2-1, NR4A3, PAFAH1B1, PAK1, RAB11A, RPL24, SOD1, STMN1, WNT5A]
regulation of actin cytoskeleton organization	18	[ACTR3, ARF1, ARPC1A, ARPC2, ARPC4, CAPZA2, CAPZA3, CAPZB, CFL1, MTPN, PAK1, PFN1, PHPT1, RAC1, RDX, RHOA, S100A10, STMN1]
small molecule biosynthetic process	18	[ATF4, COQ10B, DKKL1, FBP1, GLS, GLUL, GPI, HAS2, INSIG2, PGAM2, PGP, PHGDH, PTGES3, QDPR, SDHAF3, SOD1, SORD, TPI1]
regulation of cell morphogenesis	18	[ARPC2, CAPZB, CD44, CFL1, CSNK1G2, DPYSL2, EFNA1, EZR, KIT, PAFAH1B1, PAK1, RAB11A, RAC1, RDX, RIMS2, S100A10, VRK3, WNT5A]
proximal promoter sequence-specific DNA binding	18	[ACTB, ATF4, BHLHE41, CHD4, CREB3L2, CTNNB1, DLX5, FOXP1, GATA3, HAND2, HNRNPK, JUN, MEIS1, NR4A3, PRRX1, TFAM, THAP1, YBX1]
RNA polymerase II proximal promoter sequence-specific DNA binding	18	[ACTB, ATF4, BHLHE41, CHD4, CREB3L2, CTNNB1, DLX5, FOXP1, GATA3, HAND2, HNRNPK, JUN, MEIS1, NR4A3, PRRX1, TFAM, THAP1, YBX1]
regulation of cell morphogenesis	18	[ARPC2, CAPZB, CD44, CFL1, CSNK1G2, DPYSL2, EFNA1, EZR, KIT, PAFAH1B1, PAK1, RAB11A, RAC1, RDX, RIMS2, S100A10, VRK3, WNT5A]
cell morphogenesis involved in neuron differentiation	18	[CFL1, DLX5, DPYSL2, EFNA1, ELAVL4, FOXP1, GAP43, GATA3, KIF5C, NKX2-1, NR4A3, PAFAH1B1, PAK1, RAB11A, RPL24, SOD1, STMN1, WNT5A]
regulation of actin cytoskeleton organization	18	[ACTR3, ARF1, ARPC1A, ARPC2, ARPC4, CAPZA2, CAPZA3, CAPZB, CFL1, MTPN, PAK1, PFN1, PHPT1, RAC1, RDX, RHOA, S100A10, STMN1]
ubiquitin-like protein transferase activity	18	[ARIH1, CDC34, LTN1, MPHOSPH8, PELI1, RNF11, SOD1, TRIM36, UBE2B, UBE2D2, UBE2F, UBE2J1, UBE2M, UBE2N, UBE2Q1, UBE2R2, UBE2V1, ZNRF1]
ubiquitin-protein transferase activity	18	[ARIH1, CDC34, LTN1, MPHOSPH8, PELI1, RNF11, SOD1, TRIM36, UBE2B, UBE2D2, UBE2F, UBE2J1, UBE2M, UBE2N, UBE2Q1, UBE2R2, UBE2V1, ZNRF1]
protein kinase binding	18	[ANKRD2, ATF4, BAG5, CCNY, CTNNB1, DPYSL2, EZR, HSP90AA1, HSPB1, NR4A3, OSR1, PEBP1, PPP1CB, RAC1, RACK1, RPS3, RPS7, YWHAZ]
positive regulation of cellular component movement	18	[ELP5, GATA3, HAS2, HMGB1, HSPB1, JUN, LGALS3, PAK1, PHPT1, RAB11A, RAC1, RACK1, RDX, RHOA, S100A14, STMN1, TGFB2, WNT5A]
regulation of cell morphogenesis	18	[ARPC2, CAPZB, CD44, CFL1, CSNK1G2, DPYSL2, EFNA1, EZR, KIT, PAFAH1B1, PAK1, RAB11A, RAC1, RDX, RIMS2, S100A10, VRK3, WNT5A]
cell morphogenesis involved in neuron differentiation	18	[CFL1, DLX5, DPYSL2, EFNA1, ELAVL4, FOXP1, GAP43, GATA3, KIF5C, NKX2-1, NR4A3, PAFAH1B1, PAK1, RAB11A, RPL24, SOD1, STMN1, WNT5A]
small molecule biosynthetic process	18	[ATF4, COQ10B, DKKL1, FBP1, GLS, GLUL, GPI, HAS2, INSIG2, PGAM2, PGP, PHGDH, PTGES3, QDPR, SDHAF3, SOD1, SORD, TPI1]
coenzyme metabolic process	18	[AHCYL2, ASPDH, COQ10B, ENO1, FBP1, GAPDH, GAPDHS, GPI, GSTO2, MAT2A, NCOR1, PDHA2, PGAM2, PKM, QDPR, SUCLG2, THTPA, TPI1]
positive regulation of cellular component movement	18	[ELP5, GATA3, HAS2, HMGB1, HSPB1, JUN, LGALS3, PAK1, PHPT1, RAB11A, RAC1, RACK1, RDX, RHOA, S100A14, STMN1, TGFB2, WNT5A]
cellular component disassembly	18	[CAPZA2, CAPZA3, CAPZB, CFL1, EIF5A, FUNDC2, GABARAP, KIF2C, MAP1LC3A, MTPN, PAFAH1B1, RDX, RETREG1, RUVBL1, SOD1, SPATA18, STMN1, TNP1]
regulation of cell morphogenesis	18	[ARPC2, CAPZB, CD44, CFL1, CSNK1G2, DPYSL2, EFNA1, EZR, KIT, PAFAH1B1, PAK1, RAB11A, RAC1, RDX, RIMS2, S100A10, VRK3, WNT5A]
regulation of actin cytoskeleton organization	18	[ACTR3, ARF1, ARPC1A, ARPC2, ARPC4, CAPZA2, CAPZA3, CAPZB, CFL1, MTPN, PAK1, PFN1, PHPT1, RAC1, RDX, RHOA, S100A10, STMN1]
positive regulation of cellular component movement	18	[ELP5, GATA3, HAS2, HMGB1, HSPB1, JUN, LGALS3, PAK1, PHPT1, RAB11A, RAC1, RACK1, RDX, RHOA, S100A14, STMN1, TGFB2, WNT5A]
embryonic organ development	18	[CITED2, CTNNB1, DLX5, EFNA1, EIF4A3, GATA3, HAND2, INSIG2, KIT, NR4A3, OSR1, PRRX1, RPL10, RPL38, SOD1, TGFB2, TRA2B, WNT5A]
proximal promoter sequence-specific DNA binding	18	[ACTB, ATF4, BHLHE41, CHD4, CREB3L2, CTNNB1, DLX5, FOXP1, GATA3, HAND2, HNRNPK, JUN, MEIS1, NR4A3, PRRX1, TFAM, THAP1, YBX1]
cell morphogenesis involved in neuron differentiation	18	[CFL1, DLX5, DPYSL2, EFNA1, ELAVL4, FOXP1, GAP43, GATA3, KIF5C, NKX2-1, NR4A3, PAFAH1B1, PAK1, RAB11A, RPL24, SOD1, STMN1, WNT5A]
RNA polymerase II proximal promoter sequence-specific DNA binding	18	[ACTB, ATF4, BHLHE41, CHD4, CREB3L2, CTNNB1, DLX5, FOXP1, GATA3, HAND2, HNRNPK, JUN, MEIS1, NR4A3, PRRX1, TFAM, THAP1, YBX1]
cell leading edge	17	[ACTR3, ARF1, ARPC2, CAPZB, CD44, CFL1, CTNNB1, EZR, HSP90AA1, LMO4, PAFAH1B1, PAK1, RAC1, RDX, RHOA, RPS3, VIM]
regulation of actin filament organization	17	[ACTR3, ARF1, ARPC1A, ARPC2, ARPC4, CAPZA2, CAPZA3, CAPZB, CFL1, MTPN, PAK1, PFN1, RAC1, RDX, RHOA, S100A10, STMN1]
ribonucleoprotein granule	17	[ACTB, CNOT7, EIF4E, FXR1, HABP4, HNRNPL, HNRNPU, LSM14A, LSM2, MCRIP1, PABPC1, PCBP1, POLR2D, RAC1, RPLP0, SUMO1, YBX1]
regulation of actin filament organization	17	[ACTR3, ARF1, ARPC1A, ARPC2, ARPC4, CAPZA2, CAPZA3, CAPZB, CFL1, MTPN, PAK1, PFN1, RAC1, RDX, RHOA, S100A10, STMN1]
negative regulation of intracellular signal transduction	17	[BAG5, CD44, CDC34, DUSP14, EFNA1, EZR, FBP1, FKBP1A, GPS2, HSPB1, NCOR1, PAFAH1B1, RACK1, STMN1, UBE2B, VRK3, YBX3]
negative regulation of intracellular signal transduction	17	[BAG5, CD44, CDC34, DUSP14, EFNA1, EZR, FBP1, FKBP1A, GPS2, HSPB1, NCOR1, PAFAH1B1, RACK1, STMN1, UBE2B, VRK3, YBX3]
regulation of neuron differentiation	17	[BAG5, CFL1, DPYSL2, EFNA1, EIF4E, FKBP1A, FKBP4, GATA3, MEIS1, PAFAH1B1, PAK1, PRRX1, RAB11A, RHOA, RIMS2, VIM, WNT5A]
cell leading edge	17	[ACTR3, ARF1, ARPC2, CAPZB, CD44, CFL1, CTNNB1, EZR, HSP90AA1, LMO4, PAFAH1B1, PAK1, RAC1, RDX, RHOA, RPS3, VIM]
cell leading edge	17	[ACTR3, ARF1, ARPC2, CAPZB, CD44, CFL1, CTNNB1, EZR, HSP90AA1, LMO4, PAFAH1B1, PAK1, RAC1, RDX, RHOA, RPS3, VIM]
ribonucleoprotein granule	17	[ACTB, CNOT7, EIF4E, FXR1, HABP4, HNRNPL, HNRNPU, LSM14A, LSM2, MCRIP1, PABPC1, PCBP1, POLR2D, RAC1, RPLP0, SUMO1, YBX1]
positive regulation of locomotion	17	[ELP5, GATA3, HAS2, HMGB1, HSPB1, JUN, LGALS3, PAK1, PHPT1, RAB11A, RAC1, RACK1, RDX, RHOA, S100A14, TGFB2, WNT5A]
positive regulation of cell motility	17	[ELP5, GATA3, HAS2, HMGB1, HSPB1, JUN, LGALS3, PAK1, PHPT1, RAB11A, RAC1, RACK1, RDX, RHOA, S100A14, TGFB2, WNT5A]
cell leading edge	17	[ACTR3, ARF1, ARPC2, CAPZB, CD44, CFL1, CTNNB1, EZR, HSP90AA1, LMO4, PAFAH1B1, PAK1, RAC1, RDX, RHOA, RPS3, VIM]
cell leading edge	17	[ACTR3, ARF1, ARPC2, CAPZB, CD44, CFL1, CTNNB1, EZR, HSP90AA1, LMO4, PAFAH1B1, PAK1, RAC1, RDX, RHOA, RPS3, VIM]
energy derivation by oxidation of organic compounds	17	[ALDH5A1, CISD1, COQ10B, COX1, COX3, COX4I1, HMGB1, NDUFA5, NR4A3, PHKG2, POLG2, PPARGC1A, PPP1CB, PPP1R2, PTGES3, SDHB, SUCLG2]
positive regulation of locomotion	17	[ELP5, GATA3, HAS2, HMGB1, HSPB1, JUN, LGALS3, PAK1, PHPT1, RAB11A, RAC1, RACK1, RDX, RHOA, S100A14, TGFB2, WNT5A]
positive regulation of cell motility	17	[ELP5, GATA3, HAS2, HMGB1, HSPB1, JUN, LGALS3, PAK1, PHPT1, RAB11A, RAC1, RACK1, RDX, RHOA, S100A14, TGFB2, WNT5A]
purine-containing compound metabolic process	17	[AHCYL2, AK1, COX1, COX4I1, COX7A2L, ENO1, FBP1, GAPDH, GAPDHS, GPI, NCOR1, PGAM2, PKM, PPARGC1A, RACK1, TPI1, WNT5A]
ribose phosphate metabolic process	17	[AK1, COX1, COX4I1, COX7A2L, ENO1, FBP1, GAPDH, GAPDHS, GPI, NCOR1, PGAM2, PKM, PPARGC1A, RACK1, TPI1, UCK2, WNT5A]
ribonucleotide metabolic process	17	[AK1, COX1, COX4I1, COX7A2L, ENO1, FBP1, GAPDH, GAPDHS, GPI, NCOR1, PGAM2, PKM, PPARGC1A, RACK1, TPI1, UCK2, WNT5A]
regulation of neuron differentiation	17	[BAG5, CFL1, DPYSL2, EFNA1, EIF4E, FKBP1A, FKBP4, GATA3, MEIS1, PAFAH1B1, PAK1, PRRX1, RAB11A, RHOA, RIMS2, VIM, WNT5A]
regulation of neuron differentiation	17	[BAG5, CFL1, DPYSL2, EFNA1, EIF4E, FKBP1A, FKBP4, GATA3, MEIS1, PAFAH1B1, PAK1, PRRX1, RAB11A, RHOA, RIMS2, VIM, WNT5A]
axon development	17	[DLX5, DPYSL2, EFNA1, FKBP1A, FOXP1, GAP43, GATA3, JUN, KIF5C, NKX2-1, NR4A3, PAFAH1B1, PAK1, RAB11A, RPL24, STMN1, WNT5A]
cell leading edge	17	[ACTR3, ARF1, ARPC2, CAPZB, CD44, CFL1, CTNNB1, EZR, HSP90AA1, LMO4, PAFAH1B1, PAK1, RAC1, RDX, RHOA, RPS3, VIM]
regulation of actin filament organization	17	[ACTR3, ARF1, ARPC1A, ARPC2, ARPC4, CAPZA2, CAPZA3, CAPZB, CFL1, MTPN, PAK1, PFN1, RAC1, RDX, RHOA, S100A10, STMN1]
Alzheimer's disease	17	[APH1A, CALM1, CALM2, CALM3, COX1, COX3, COX4I1, COX7A2, COX7A2L, COX7B, GAPDH, LOC101902937, LOC782270, MGC148714, NDUFA5, NDUFB2, SDHB]
energy derivation by oxidation of organic compounds	17	[ALDH5A1, CISD1, COQ10B, COX1, COX3, COX4I1, HMGB1, NDUFA5, NR4A3, PHKG2, POLG2, PPARGC1A, PPP1CB, PPP1R2, PTGES3, SDHB, SUCLG2]
regulation of neuron differentiation	17	[BAG5, CFL1, DPYSL2, EFNA1, EIF4E, FKBP1A, FKBP4, GATA3, MEIS1, PAFAH1B1, PAK1, PRRX1, RAB11A, RHOA, RIMS2, VIM, WNT5A]
regulation of neuron differentiation	17	[BAG5, CFL1, DPYSL2, EFNA1, EIF4E, FKBP1A, FKBP4, GATA3, MEIS1, PAFAH1B1, PAK1, PRRX1, RAB11A, RHOA, RIMS2, VIM, WNT5A]
axon development	17	[DLX5, DPYSL2, EFNA1, FKBP1A, FOXP1, GAP43, GATA3, JUN, KIF5C, NKX2-1, NR4A3, PAFAH1B1, PAK1, RAB11A, RPL24, STMN1, WNT5A]
negative regulation of intracellular signal transduction	17	[BAG5, CD44, CDC34, DUSP14, EFNA1, EZR, FBP1, FKBP1A, GPS2, HSPB1, NCOR1, PAFAH1B1, RACK1, STMN1, UBE2B, VRK3, YBX3]
regulation of actin filament organization	17	[ACTR3, ARF1, ARPC1A, ARPC2, ARPC4, CAPZA2, CAPZA3, CAPZB, CFL1, MTPN, PAK1, PFN1, RAC1, RDX, RHOA, S100A10, STMN1]
proteasome-mediated ubiquitin-dependent protein catabolic process	17	[ARIH1, BAG5, CDC34, MGC137055, RACK1, RNF11, RPL11, SEC61B, SKP1, SOD1, SUMO1, UBE2B, UBE2J1, UBE2R2, UBXN11, UBXN4, ZNRF1]
cell leading edge	17	[ACTR3, ARF1, ARPC2, CAPZB, CD44, CFL1, CTNNB1, EZR, HSP90AA1, LMO4, PAFAH1B1, PAK1, RAC1, RDX, RHOA, RPS3, VIM]
positive regulation of locomotion	17	[ELP5, GATA3, HAS2, HMGB1, HSPB1, JUN, LGALS3, PAK1, PHPT1, RAB11A, RAC1, RACK1, RDX, RHOA, S100A14, TGFB2, WNT5A]
positive regulation of cell motility	17	[ELP5, GATA3, HAS2, HMGB1, HSPB1, JUN, LGALS3, PAK1, PHPT1, RAB11A, RAC1, RACK1, RDX, RHOA, S100A14, TGFB2, WNT5A]
regulation of neuron differentiation	17	[BAG5, CFL1, DPYSL2, EFNA1, EIF4E, FKBP1A, FKBP4, GATA3, MEIS1, PAFAH1B1, PAK1, PRRX1, RAB11A, RHOA, RIMS2, VIM, WNT5A]
axon development	17	[DLX5, DPYSL2, EFNA1, FKBP1A, FOXP1, GAP43, GATA3, JUN, KIF5C, NKX2-1, NR4A3, PAFAH1B1, PAK1, RAB11A, RPL24, STMN1, WNT5A]
energy derivation by oxidation of organic compounds	17	[ALDH5A1, CISD1, COQ10B, COX1, COX3, COX4I1, HMGB1, NDUFA5, NR4A3, PHKG2, POLG2, PPARGC1A, PPP1CB, PPP1R2, PTGES3, SDHB, SUCLG2]
purine-containing compound metabolic process	17	[AHCYL2, AK1, COX1, COX4I1, COX7A2L, ENO1, FBP1, GAPDH, GAPDHS, GPI, NCOR1, PGAM2, PKM, PPARGC1A, RACK1, TPI1, WNT5A]
ribose phosphate metabolic process	17	[AK1, COX1, COX4I1, COX7A2L, ENO1, FBP1, GAPDH, GAPDHS, GPI, NCOR1, PGAM2, PKM, PPARGC1A, RACK1, TPI1, UCK2, WNT5A]
ribonucleotide metabolic process	17	[AK1, COX1, COX4I1, COX7A2L, ENO1, FBP1, GAPDH, GAPDHS, GPI, NCOR1, PGAM2, PKM, PPARGC1A, RACK1, TPI1, UCK2, WNT5A]
positive regulation of locomotion	17	[ELP5, GATA3, HAS2, HMGB1, HSPB1, JUN, LGALS3, PAK1, PHPT1, RAB11A, RAC1, RACK1, RDX, RHOA, S100A14, TGFB2, WNT5A]
positive regulation of cell motility	17	[ELP5, GATA3, HAS2, HMGB1, HSPB1, JUN, LGALS3, PAK1, PHPT1, RAB11A, RAC1, RACK1, RDX, RHOA, S100A14, TGFB2, WNT5A]
Endocytosis	17	[ACAP2, ARF1, ARPC1A, ARPC2, ARPC4, CAPZA2, CAPZA3, CAPZB, CHMP5, CLTA, GRK4, HSPA1A, HSPA1L, KIF5C, RAB11A, RHOA, UBB]
cell leading edge	17	[ACTR3, ARF1, ARPC2, CAPZB, CD44, CFL1, CTNNB1, EZR, HSP90AA1, LMO4, PAFAH1B1, PAK1, RAC1, RDX, RHOA, RPS3, VIM]
regulation of actin filament organization	17	[ACTR3, ARF1, ARPC1A, ARPC2, ARPC4, CAPZA2, CAPZA3, CAPZB, CFL1, MTPN, PAK1, PFN1, RAC1, RDX, RHOA, S100A10, STMN1]
positive regulation of locomotion	17	[ELP5, GATA3, HAS2, HMGB1, HSPB1, JUN, LGALS3, PAK1, PHPT1, RAB11A, RAC1, RACK1, RDX, RHOA, S100A14, TGFB2, WNT5A]
positive regulation of cell motility	17	[ELP5, GATA3, HAS2, HMGB1, HSPB1, JUN, LGALS3, PAK1, PHPT1, RAB11A, RAC1, RACK1, RDX, RHOA, S100A14, TGFB2, WNT5A]
regulation of neuron differentiation	17	[BAG5, CFL1, DPYSL2, EFNA1, EIF4E, FKBP1A, FKBP4, GATA3, MEIS1, PAFAH1B1, PAK1, PRRX1, RAB11A, RHOA, RIMS2, VIM, WNT5A]
axon development	17	[DLX5, DPYSL2, EFNA1, FKBP1A, FOXP1, GAP43, GATA3, JUN, KIF5C, NKX2-1, NR4A3, PAFAH1B1, PAK1, RAB11A, RPL24, STMN1, WNT5A]
reproductive system development	16	[BCL2L11, CITED2, CTNNB1, DEDD, FKBP4, GATA3, H3F3A, INHBA, KIT, NKX2-1, OSR1, SOD1, SRD5A1, UBE2Q1, WNT5A, YBX3]
dephosphorylation	16	[ACP1, DUSP14, FBP1, FKBP1A, GPATCH2, LPIN1, NT5C1B, PGP, PHPT1, PPP1CB, PPP1R2, PTP4A2, TGFB2, THTPA, VRK3, YWHAE]
spindle	16	[ARL2BP, CETN1, CLTA, CTNNB1, DYNLL1, HNRNPU, HSPA1A, HSPB1, KIF22, NCOR1, ODF2, PAFAH1B1, POLB, RAB11A, RPS3, SPIN1]
gland development	16	[BCL2L11, CITED2, CTNNB1, ELF5, FKBP4, GATA3, HAND2, IRF6, JUN, LBH, LMO4, NKX2-1, POLB, TAF10, TGFB2, WNT5A]
negative regulation of phosphorylation	16	[DUSP14, DYNLL1, EFNA1, EZR, FBP1, FKBP1A, GPS2, HNRNPU, HSPB1, JUN, NCOR1, PAFAH1B1, PKIG, RACK1, UBE2B, VRK3]
DNA repair	16	[HMGB1, KIF22, MPG, POLB, POLG2, RAD21, RPS3, RUVBL1, SLF1, SOD1, SSRP1, SWI5, TNP1, UBE2B, UBE2N, UBE2V1]
spindle	16	[ARL2BP, CETN1, CLTA, CTNNB1, DYNLL1, HNRNPU, HSPA1A, HSPB1, KIF22, NCOR1, ODF2, PAFAH1B1, POLB, RAB11A, RPS3, SPIN1]
in utero embryonic development	16	[BCL2L11, BTF3, CITED2, CTNNB1, FOXP1, GATA3, GPI, HAND2, NMT1, POLG2, RTF1, SF3B6, UBE2B, VIM, YBX1, YBX3]
gland development	16	[BCL2L11, CITED2, CTNNB1, ELF5, FKBP4, GATA3, HAND2, IRF6, JUN, LBH, LMO4, NKX2-1, POLB, TAF10, TGFB2, WNT5A]
gland development	16	[BCL2L11, CITED2, CTNNB1, ELF5, FKBP4, GATA3, HAND2, IRF6, JUN, LBH, LMO4, NKX2-1, POLB, TAF10, TGFB2, WNT5A]
in utero embryonic development	16	[BCL2L11, BTF3, CITED2, CTNNB1, FOXP1, GATA3, GPI, HAND2, NMT1, POLG2, RTF1, SF3B6, UBE2B, VIM, YBX1, YBX3]
neuron death	16	[ATF4, BCL2L11, CTNNB1, GAPDH, GATA3, JUN, NR4A3, POLB, PPARGC1A, RACK1, RETREG1, SOD1, TGFB2, TNFRSF21, UBA52, UBB]
neuron death	16	[ATF4, BCL2L11, CTNNB1, GAPDH, GATA3, JUN, NR4A3, POLB, PPARGC1A, RACK1, RETREG1, SOD1, TGFB2, TNFRSF21, UBA52, UBB]
positive regulation of protein complex assembly	16	[ACTR3, ARF1, ARPC1A, ARPC2, ARPC4, BCL2L11, CTNNB1, GTF2F2, HSPA1A, JUN, PAK1, RAC1, RACK1, RPS3, SLF1, SUMO1]
positive regulation of cell migration	16	[ELP5, GATA3, HAS2, HMGB1, HSPB1, JUN, LGALS3, PAK1, RAB11A, RAC1, RACK1, RDX, RHOA, S100A14, TGFB2, WNT5A]
positive regulation of cell migration	16	[ELP5, GATA3, HAS2, HMGB1, HSPB1, JUN, LGALS3, PAK1, RAB11A, RAC1, RACK1, RDX, RHOA, S100A14, TGFB2, WNT5A]
gland development	16	[BCL2L11, CITED2, CTNNB1, ELF5, FKBP4, GATA3, HAND2, IRF6, JUN, LBH, LMO4, NKX2-1, POLB, TAF10, TGFB2, WNT5A]
positive regulation of cell migration	16	[ELP5, GATA3, HAS2, HMGB1, HSPB1, JUN, LGALS3, PAK1, RAB11A, RAC1, RACK1, RDX, RHOA, S100A14, TGFB2, WNT5A]
purine nucleotide metabolic process	16	[AK1, COX1, COX4I1, COX7A2L, ENO1, FBP1, GAPDH, GAPDHS, GPI, NCOR1, PGAM2, PKM, PPARGC1A, RACK1, TPI1, WNT5A]
purine ribonucleotide metabolic process	16	[AK1, COX1, COX4I1, COX7A2L, ENO1, FBP1, GAPDH, GAPDHS, GPI, NCOR1, PGAM2, PKM, PPARGC1A, RACK1, TPI1, WNT5A]
spindle	16	[ARL2BP, CETN1, CLTA, CTNNB1, DYNLL1, HNRNPU, HSPA1A, HSPB1, KIF22, NCOR1, ODF2, PAFAH1B1, POLB, RAB11A, RPS3, SPIN1]
reproductive system development	16	[BCL2L11, CITED2, CTNNB1, DEDD, FKBP4, GATA3, H3F3A, INHBA, KIT, NKX2-1, OSR1, SOD1, SRD5A1, UBE2Q1, WNT5A, YBX3]
gland development	16	[BCL2L11, CITED2, CTNNB1, ELF5, FKBP4, GATA3, HAND2, IRF6, JUN, LBH, LMO4, NKX2-1, POLB, TAF10, TGFB2, WNT5A]
gland development	16	[BCL2L11, CITED2, CTNNB1, ELF5, FKBP4, GATA3, HAND2, IRF6, JUN, LBH, LMO4, NKX2-1, POLB, TAF10, TGFB2, WNT5A]
spindle	16	[ARL2BP, CETN1, CLTA, CTNNB1, DYNLL1, HNRNPU, HSPA1A, HSPB1, KIF22, NCOR1, ODF2, PAFAH1B1, POLB, RAB11A, RPS3, SPIN1]
gland development	16	[BCL2L11, CITED2, CTNNB1, ELF5, FKBP4, GATA3, HAND2, IRF6, JUN, LBH, LMO4, NKX2-1, POLB, TAF10, TGFB2, WNT5A]
dephosphorylation	16	[ACP1, DUSP14, FBP1, FKBP1A, GPATCH2, LPIN1, NT5C1B, PGP, PHPT1, PPP1CB, PPP1R2, PTP4A2, TGFB2, THTPA, VRK3, YWHAE]
negative regulation of phosphorylation	16	[DUSP14, DYNLL1, EFNA1, EZR, FBP1, FKBP1A, GPS2, HNRNPU, HSPB1, JUN, NCOR1, PAFAH1B1, PKIG, RACK1, UBE2B, VRK3]
reproductive system development	16	[BCL2L11, CITED2, CTNNB1, DEDD, FKBP4, GATA3, H3F3A, INHBA, KIT, NKX2-1, OSR1, SOD1, SRD5A1, UBE2Q1, WNT5A, YBX3]
Spliceosome	16	[CTNNBL1, DDX5, EIF4A3, HNRNPC, HNRNPK, HNRNPU, HSPA1A, HSPA1L, LOC100299503, LSM2, PCBP1, SF3B6, SLU7, SRSF3, SRSF9, TRA2B]
positive regulation of protein complex assembly	16	[ACTR3, ARF1, ARPC1A, ARPC2, ARPC4, BCL2L11, CTNNB1, GTF2F2, HSPA1A, JUN, PAK1, RAC1, RACK1, RPS3, SLF1, SUMO1]
regulation of protein polymerization	16	[ACTR3, ARF1, ARPC1A, ARPC2, ARPC4, CAPZA2, CAPZA3, CAPZB, HSPA1A, MTPN, PAK1, PFN1, RAC1, RDX, RPS3, STMN1]
protein polymerization	16	[ACTR3, ARF1, ARPC1A, ARPC2, ARPC4, CAPZA2, CAPZA3, CAPZB, HSPA1A, MTPN, PAK1, PFN1, RAC1, RDX, RPS3, STMN1]
neuron death	16	[ATF4, BCL2L11, CTNNB1, GAPDH, GATA3, JUN, NR4A3, POLB, PPARGC1A, RACK1, RETREG1, SOD1, TGFB2, TNFRSF21, UBA52, UBB]
spindle	16	[ARL2BP, CETN1, CLTA, CTNNB1, DYNLL1, HNRNPU, HSPA1A, HSPB1, KIF22, NCOR1, ODF2, PAFAH1B1, POLB, RAB11A, RPS3, SPIN1]
neuron death	16	[ATF4, BCL2L11, CTNNB1, GAPDH, GATA3, JUN, NR4A3, POLB, PPARGC1A, RACK1, RETREG1, SOD1, TGFB2, TNFRSF21, UBA52, UBB]
positive regulation of cell migration	16	[ELP5, GATA3, HAS2, HMGB1, HSPB1, JUN, LGALS3, PAK1, RAB11A, RAC1, RACK1, RDX, RHOA, S100A14, TGFB2, WNT5A]
purine nucleotide metabolic process	16	[AK1, COX1, COX4I1, COX7A2L, ENO1, FBP1, GAPDH, GAPDHS, GPI, NCOR1, PGAM2, PKM, PPARGC1A, RACK1, TPI1, WNT5A]
purine ribonucleotide metabolic process	16	[AK1, COX1, COX4I1, COX7A2L, ENO1, FBP1, GAPDH, GAPDHS, GPI, NCOR1, PGAM2, PKM, PPARGC1A, RACK1, TPI1, WNT5A]
positive regulation of cell migration	16	[ELP5, GATA3, HAS2, HMGB1, HSPB1, JUN, LGALS3, PAK1, RAB11A, RAC1, RACK1, RDX, RHOA, S100A14, TGFB2, WNT5A]
positive regulation of protein complex assembly	16	[ACTR3, ARF1, ARPC1A, ARPC2, ARPC4, BCL2L11, CTNNB1, GTF2F2, HSPA1A, JUN, PAK1, RAC1, RACK1, RPS3, SLF1, SUMO1]
regulation of protein polymerization	16	[ACTR3, ARF1, ARPC1A, ARPC2, ARPC4, CAPZA2, CAPZA3, CAPZB, HSPA1A, MTPN, PAK1, PFN1, RAC1, RDX, RPS3, STMN1]
protein polymerization	16	[ACTR3, ARF1, ARPC1A, ARPC2, ARPC4, CAPZA2, CAPZA3, CAPZB, HSPA1A, MTPN, PAK1, PFN1, RAC1, RDX, RPS3, STMN1]
reproductive system development	16	[BCL2L11, CITED2, CTNNB1, DEDD, FKBP4, GATA3, H3F3A, INHBA, KIT, NKX2-1, OSR1, SOD1, SRD5A1, UBE2Q1, WNT5A, YBX3]
gland development	16	[BCL2L11, CITED2, CTNNB1, ELF5, FKBP4, GATA3, HAND2, IRF6, JUN, LBH, LMO4, NKX2-1, POLB, TAF10, TGFB2, WNT5A]
positive regulation of cell migration	16	[ELP5, GATA3, HAS2, HMGB1, HSPB1, JUN, LGALS3, PAK1, RAB11A, RAC1, RACK1, RDX, RHOA, S100A14, TGFB2, WNT5A]
in utero embryonic development	16	[BCL2L11, BTF3, CITED2, CTNNB1, FOXP1, GATA3, GPI, HAND2, NMT1, POLG2, RTF1, SF3B6, UBE2B, VIM, YBX1, YBX3]
Viral carcinogenesis	15	[ATF4, CHD4, CREB3L2, HIST1H2BD, HNRNPK, JUN, LOC107131556, LOC404073, PKM, POLB, RAC1, RHOA, YWHAE, YWHAQ, YWHAZ]
ribosomal large subunit biogenesis	15	[RPL10, RPL10A, RPL11, RPL12, RPL14, RPL24, RPL26, RPL3, RPL35, RPL35A, RPL36, RPL38, RPL5, RPL6, RPL7]
reproductive structure development	15	[BCL2L11, CITED2, CTNNB1, DEDD, FKBP4, GATA3, H3F3A, INHBA, KIT, NKX2-1, OSR1, SOD1, SRD5A1, WNT5A, YBX3]
ribosomal large subunit biogenesis	15	[RPL10, RPL10A, RPL11, RPL12, RPL14, RPL24, RPL26, RPL3, RPL35, RPL35A, RPL36, RPL38, RPL5, RPL6, RPL7]
ribosome assembly	15	[NSUN4, RPL10, RPL11, RPL12, RPL24, RPL3, RPL38, RPL5, RPL6, RPS15, RPS17, RPS19, RPS28, RPS5, RPSA]
ribosome assembly	15	[NSUN4, RPL10, RPL11, RPL12, RPL24, RPL3, RPL38, RPL5, RPL6, RPS15, RPS17, RPS19, RPS28, RPS5, RPSA]
ribosome assembly	15	[NSUN4, RPL10, RPL11, RPL12, RPL24, RPL3, RPL38, RPL5, RPL6, RPS15, RPS17, RPS19, RPS28, RPS5, RPSA]
cell projection assembly	15	[ACTR3, ARPC2, CAPZB, CEP41, DYNLL1, DYNLL2, EZR, GAP43, KIT, PCNT, RAC1, RDX, SPATA6, TEKT1, UBE2B]
plasma membrane bounded cell projection assembly	15	[ACTR3, ARPC2, CAPZB, CEP41, DYNLL1, DYNLL2, EZR, GAP43, KIT, PCNT, RAC1, RDX, SPATA6, TEKT1, UBE2B]
positive regulation of establishment of protein localization	15	[EZR, GATA3, GPI, HMGB1, HSPA1L, OAZ1, PCNT, PTP4A2, RACK1, RUVBL1, SERP1, TGFB2, UBL4B, WNT5A, YWHAE]
microtubule binding	15	[BCL2L11, CETN1, DPYSL2, EZR, GABARAP, GAPDH, KIF22, KIF2C, KIF5C, PAFAH1B1, POLB, RAB11A, RPS3, TPT1, VPS41]
Parkinson's disease	15	[COX1, COX3, COX4I1, COX7A2, COX7A2L, COX7B, LOC101902937, LOC782270, MGC148714, NDUFA5, NDUFB2, SDHB, SLC25A6, UBB, UBE2J1]
Proteoglycans in cancer	15	[ACTB, ACTG1, CAMK2D, CD44, CTNNB1, DDX5, EZR, PAK1, PPP1CB, RAC1, RDX, RHOA, RPS6, TGFB2, WNT5A]
Regulation of actin cytoskeleton	15	[ACTB, ACTG1, ARPC1A, ARPC2, ARPC4, CFL1, EZR, MYL12A, PAK1, PFN1, PPP1CB, RAC1, RDX, RHOA, TMSB4X]
Proteoglycans in cancer	15	[ACTB, ACTG1, CAMK2D, CD44, CTNNB1, DDX5, EZR, PAK1, PPP1CB, RAC1, RDX, RHOA, RPS6, TGFB2, WNT5A]
Non-alcoholic fatty liver disease (NAFLD)	15	[ATF4, BCL2L11, COX1, COX3, COX4I1, COX7A2, COX7A2L, COX7B, JUN, LOC101902937, MGC148714, NDUFA5, NDUFB2, RAC1, SDHB]
Parkinson's disease	15	[COX1, COX3, COX4I1, COX7A2, COX7A2L, COX7B, LOC101902937, LOC782270, MGC148714, NDUFA5, NDUFB2, SDHB, SLC25A6, UBB, UBE2J1]
regulation of cellular protein catabolic process	15	[ARIH1, BAG5, EFNA1, EZR, MGC137055, PSME1, PSMF1, RACK1, RDX, RPL11, RPS7, SUMO1, UBA52, UBB, UBE2J1]
ribosome assembly	15	[NSUN4, RPL10, RPL11, RPL12, RPL24, RPL3, RPL38, RPL5, RPL6, RPS15, RPS17, RPS19, RPS28, RPS5, RPSA]
positive regulation of cell cycle	15	[BCL2L11, CCNY, CITED2, EIF4E, HNRNPU, NPM2, NR4A3, RAB11A, RAD21, RDX, RHOA, RPL26, SLF1, UBE2B, WNT5A]
response to oxidative stress	15	[ANKRD2, ATF4, BAG5, CTNNB1, FKBP1A, HSPB1, JUN, NR4A3, PPARGC1A, PRDX5, RACK1, ROMO1, RPS3, SDHAF3, SOD1]
Regulation of actin cytoskeleton	15	[ACTB, ACTG1, ARPC1A, ARPC2, ARPC4, CFL1, EZR, MYL12A, PAK1, PFN1, PPP1CB, RAC1, RDX, RHOA, TMSB4X]
Regulation of actin cytoskeleton	15	[ACTB, ACTG1, ARPC1A, ARPC2, ARPC4, CFL1, EZR, MYL12A, PAK1, PFN1, PPP1CB, RAC1, RDX, RHOA, TMSB4X]
cellular response to lipid	15	[DDX5, EIF4E, FDX1, FKBP4, HNRNPU, LANCL2, LBH, NR4A3, OSR1, PABPN1, PAK1, PAQR5, PTGES3, RHOA, WNT5A]
cellular response to organic cyclic compound	15	[ATF4, CTNNB1, DDX5, EIF4E, EZR, FDX1, FKBP4, HNRNPU, LBH, NCOR1, NR4A3, PAK1, PAQR5, PTGES3, RAP1B]
Proteoglycans in cancer	15	[ACTB, ACTG1, CAMK2D, CD44, CTNNB1, DDX5, EZR, PAK1, PPP1CB, RAC1, RDX, RHOA, RPS6, TGFB2, WNT5A]
positive regulation of establishment of protein localization	15	[EZR, GATA3, GPI, HMGB1, HSPA1L, OAZ1, PCNT, PTP4A2, RACK1, RUVBL1, SERP1, TGFB2, UBL4B, WNT5A, YWHAE]
Regulation of actin cytoskeleton	15	[ACTB, ACTG1, ARPC1A, ARPC2, ARPC4, CFL1, EZR, MYL12A, PAK1, PFN1, PPP1CB, RAC1, RDX, RHOA, TMSB4X]
Proteoglycans in cancer	15	[ACTB, ACTG1, CAMK2D, CD44, CTNNB1, DDX5, EZR, PAK1, PPP1CB, RAC1, RDX, RHOA, RPS6, TGFB2, WNT5A]
sperm part	15	[AK1, CABYR, CAPZA3, CAPZB, CYLC1, DKKL1, GABARAP, ODF1, PRSS37, ROPN1, SPA17, SPATA6, TCP11, TEKT1, TRIM36]
cellular nitrogen compound catabolic process	15	[ALLC, ASPDH, CNOT7, CSDE1, DDX5, EIF3E, EIF4A3, HNRNPU, PABPC1, POLR2D, RACK1, RNASEH1, SOD1, SYNCRIP, YBX1]
heterocycle catabolic process	15	[ALLC, ASPDH, CNOT7, CSDE1, DDX5, EIF3E, EIF4A3, HNRNPU, PABPC1, POLR2D, RACK1, RNASEH1, SOD1, SYNCRIP, YBX1]
organic cyclic compound catabolic process	15	[ALLC, ASPDH, CNOT7, CSDE1, DDX5, EIF3E, EIF4A3, HNRNPU, PABPC1, POLR2D, RACK1, RNASEH1, SOD1, SYNCRIP, YBX1]
response to oxidative stress	15	[ANKRD2, ATF4, BAG5, CTNNB1, FKBP1A, HSPB1, JUN, NR4A3, PPARGC1A, PRDX5, RACK1, ROMO1, RPS3, SDHAF3, SOD1]
nucleoside monophosphate metabolic process	15	[AK1, COX1, COX4I1, COX7A2L, ENO1, FBP1, GAPDH, GAPDHS, GPI, NCOR1, PGAM2, PKM, PPARGC1A, TPI1, UCK2]
nucleoside triphosphate metabolic process	15	[AK1, COX1, COX4I1, COX7A2L, ENO1, FBP1, GAPDH, GAPDHS, GPI, NCOR1, PGAM2, PKM, PPARGC1A, TPI1, UCK2]
ribonucleoside monophosphate metabolic process	15	[AK1, COX1, COX4I1, COX7A2L, ENO1, FBP1, GAPDH, GAPDHS, GPI, NCOR1, PGAM2, PKM, PPARGC1A, TPI1, UCK2]
ribonucleoside triphosphate metabolic process	15	[AK1, COX1, COX4I1, COX7A2L, ENO1, FBP1, GAPDH, GAPDHS, GPI, NCOR1, PGAM2, PKM, PPARGC1A, TPI1, UCK2]
Proteoglycans in cancer	15	[ACTB, ACTG1, CAMK2D, CD44, CTNNB1, DDX5, EZR, PAK1, PPP1CB, RAC1, RDX, RHOA, RPS6, TGFB2, WNT5A]
microtubule binding	15	[BCL2L11, CETN1, DPYSL2, EZR, GABARAP, GAPDH, KIF22, KIF2C, KIF5C, PAFAH1B1, POLB, RAB11A, RPS3, TPT1, VPS41]
regulation of cellular protein catabolic process	15	[ARIH1, BAG5, EFNA1, EZR, MGC137055, PSME1, PSMF1, RACK1, RDX, RPL11, RPS7, SUMO1, UBA52, UBB, UBE2J1]
reproductive structure development	15	[BCL2L11, CITED2, CTNNB1, DEDD, FKBP4, GATA3, H3F3A, INHBA, KIT, NKX2-1, OSR1, SOD1, SRD5A1, WNT5A, YBX3]
axonogenesis	15	[DLX5, DPYSL2, EFNA1, FOXP1, GAP43, GATA3, KIF5C, NKX2-1, NR4A3, PAFAH1B1, PAK1, RAB11A, RPL24, STMN1, WNT5A]
Proteoglycans in cancer	15	[ACTB, ACTG1, CAMK2D, CD44, CTNNB1, DDX5, EZR, PAK1, PPP1CB, RAC1, RDX, RHOA, RPS6, TGFB2, WNT5A]
positive regulation of establishment of protein localization	15	[EZR, GATA3, GPI, HMGB1, HSPA1L, OAZ1, PCNT, PTP4A2, RACK1, RUVBL1, SERP1, TGFB2, UBL4B, WNT5A, YWHAE]
microtubule binding	15	[BCL2L11, CETN1, DPYSL2, EZR, GABARAP, GAPDH, KIF22, KIF2C, KIF5C, PAFAH1B1, POLB, RAB11A, RPS3, TPT1, VPS41]
cell projection assembly	15	[ACTR3, ARPC2, CAPZB, CEP41, DYNLL1, DYNLL2, EZR, GAP43, KIT, PCNT, RAC1, RDX, SPATA6, TEKT1, UBE2B]
plasma membrane bounded cell projection assembly	15	[ACTR3, ARPC2, CAPZB, CEP41, DYNLL1, DYNLL2, EZR, GAP43, KIT, PCNT, RAC1, RDX, SPATA6, TEKT1, UBE2B]
Non-alcoholic fatty liver disease (NAFLD)	15	[ATF4, BCL2L11, COX1, COX3, COX4I1, COX7A2, COX7A2L, COX7B, JUN, LOC101902937, MGC148714, NDUFA5, NDUFB2, RAC1, SDHB]
Parkinson's disease	15	[COX1, COX3, COX4I1, COX7A2, COX7A2L, COX7B, LOC101902937, LOC782270, MGC148714, NDUFA5, NDUFB2, SDHB, SLC25A6, UBB, UBE2J1]
axonogenesis	15	[DLX5, DPYSL2, EFNA1, FOXP1, GAP43, GATA3, KIF5C, NKX2-1, NR4A3, PAFAH1B1, PAK1, RAB11A, RPL24, STMN1, WNT5A]
cellular process involved in reproduction in multicellular organism	15	[CAPZA3, CTNNB1, H3F3A, INHBA, KIT, NPM2, PAFAH1B1, PRM2, ROPN1, SPEM1, TNP1, TNP2, TSSK6, UBE2B, UBE2J1]
reproductive structure development	15	[BCL2L11, CITED2, CTNNB1, DEDD, FKBP4, GATA3, H3F3A, INHBA, KIT, NKX2-1, OSR1, SOD1, SRD5A1, WNT5A, YBX3]
ribosomal large subunit biogenesis	15	[RPL10, RPL10A, RPL11, RPL12, RPL14, RPL24, RPL26, RPL3, RPL35, RPL35A, RPL36, RPL38, RPL5, RPL6, RPL7]
ribosome assembly	15	[NSUN4, RPL10, RPL11, RPL12, RPL24, RPL3, RPL38, RPL5, RPL6, RPS15, RPS17, RPS19, RPS28, RPS5, RPSA]
cellular nitrogen compound catabolic process	15	[ALLC, ASPDH, CNOT7, CSDE1, DDX5, EIF3E, EIF4A3, HNRNPU, PABPC1, POLR2D, RACK1, RNASEH1, SOD1, SYNCRIP, YBX1]
heterocycle catabolic process	15	[ALLC, ASPDH, CNOT7, CSDE1, DDX5, EIF3E, EIF4A3, HNRNPU, PABPC1, POLR2D, RACK1, RNASEH1, SOD1, SYNCRIP, YBX1]
organic cyclic compound catabolic process	15	[ALLC, ASPDH, CNOT7, CSDE1, DDX5, EIF3E, EIF4A3, HNRNPU, PABPC1, POLR2D, RACK1, RNASEH1, SOD1, SYNCRIP, YBX1]
Proteoglycans in cancer	15	[ACTB, ACTG1, CAMK2D, CD44, CTNNB1, DDX5, EZR, PAK1, PPP1CB, RAC1, RDX, RHOA, RPS6, TGFB2, WNT5A]
Regulation of actin cytoskeleton	15	[ACTB, ACTG1, ARPC1A, ARPC2, ARPC4, CFL1, EZR, MYL12A, PAK1, PFN1, PPP1CB, RAC1, RDX, RHOA, TMSB4X]
Proteoglycans in cancer	15	[ACTB, ACTG1, CAMK2D, CD44, CTNNB1, DDX5, EZR, PAK1, PPP1CB, RAC1, RDX, RHOA, RPS6, TGFB2, WNT5A]
cellular nitrogen compound catabolic process	15	[ALLC, ASPDH, CNOT7, CSDE1, DDX5, EIF3E, EIF4A3, HNRNPU, PABPC1, POLR2D, RACK1, RNASEH1, SOD1, SYNCRIP, YBX1]
heterocycle catabolic process	15	[ALLC, ASPDH, CNOT7, CSDE1, DDX5, EIF3E, EIF4A3, HNRNPU, PABPC1, POLR2D, RACK1, RNASEH1, SOD1, SYNCRIP, YBX1]
organic cyclic compound catabolic process	15	[ALLC, ASPDH, CNOT7, CSDE1, DDX5, EIF3E, EIF4A3, HNRNPU, PABPC1, POLR2D, RACK1, RNASEH1, SOD1, SYNCRIP, YBX1]
regulation of cellular protein catabolic process	15	[ARIH1, BAG5, EFNA1, EZR, MGC137055, PSME1, PSMF1, RACK1, RDX, RPL11, RPS7, SUMO1, UBA52, UBB, UBE2J1]
response to oxidative stress	15	[ANKRD2, ATF4, BAG5, CTNNB1, FKBP1A, HSPB1, JUN, NR4A3, PPARGC1A, PRDX5, RACK1, ROMO1, RPS3, SDHAF3, SOD1]
cellular response to organic cyclic compound	15	[ATF4, CTNNB1, DDX5, EIF4E, EZR, FDX1, FKBP4, HNRNPU, LBH, NCOR1, NR4A3, PAK1, PAQR5, PTGES3, RAP1B]
positive regulation of cell cycle	15	[BCL2L11, CCNY, CITED2, EIF4E, HNRNPU, NPM2, NR4A3, RAB11A, RAD21, RDX, RHOA, RPL26, SLF1, UBE2B, WNT5A]
regulation of cellular protein catabolic process	15	[ARIH1, BAG5, EFNA1, EZR, MGC137055, PSME1, PSMF1, RACK1, RDX, RPL11, RPS7, SUMO1, UBA52, UBB, UBE2J1]
cell projection assembly	15	[ACTR3, ARPC2, CAPZB, CEP41, DYNLL1, DYNLL2, EZR, GAP43, KIT, PCNT, RAC1, RDX, SPATA6, TEKT1, UBE2B]
plasma membrane bounded cell projection assembly	15	[ACTR3, ARPC2, CAPZB, CEP41, DYNLL1, DYNLL2, EZR, GAP43, KIT, PCNT, RAC1, RDX, SPATA6, TEKT1, UBE2B]
axonogenesis	15	[DLX5, DPYSL2, EFNA1, FOXP1, GAP43, GATA3, KIF5C, NKX2-1, NR4A3, PAFAH1B1, PAK1, RAB11A, RPL24, STMN1, WNT5A]
nucleoside monophosphate metabolic process	15	[AK1, COX1, COX4I1, COX7A2L, ENO1, FBP1, GAPDH, GAPDHS, GPI, NCOR1, PGAM2, PKM, PPARGC1A, TPI1, UCK2]
nucleoside triphosphate metabolic process	15	[AK1, COX1, COX4I1, COX7A2L, ENO1, FBP1, GAPDH, GAPDHS, GPI, NCOR1, PGAM2, PKM, PPARGC1A, TPI1, UCK2]
ribonucleoside monophosphate metabolic process	15	[AK1, COX1, COX4I1, COX7A2L, ENO1, FBP1, GAPDH, GAPDHS, GPI, NCOR1, PGAM2, PKM, PPARGC1A, TPI1, UCK2]
ribonucleoside triphosphate metabolic process	15	[AK1, COX1, COX4I1, COX7A2L, ENO1, FBP1, GAPDH, GAPDHS, GPI, NCOR1, PGAM2, PKM, PPARGC1A, TPI1, UCK2]
Regulation of actin cytoskeleton	15	[ACTB, ACTG1, ARPC1A, ARPC2, ARPC4, CFL1, EZR, MYL12A, PAK1, PFN1, PPP1CB, RAC1, RDX, RHOA, TMSB4X]
Proteoglycans in cancer	15	[ACTB, ACTG1, CAMK2D, CD44, CTNNB1, DDX5, EZR, PAK1, PPP1CB, RAC1, RDX, RHOA, RPS6, TGFB2, WNT5A]
microtubule binding	15	[BCL2L11, CETN1, DPYSL2, EZR, GABARAP, GAPDH, KIF22, KIF2C, KIF5C, PAFAH1B1, POLB, RAB11A, RPS3, TPT1, VPS41]
Proteoglycans in cancer	15	[ACTB, ACTG1, CAMK2D, CD44, CTNNB1, DDX5, EZR, PAK1, PPP1CB, RAC1, RDX, RHOA, RPS6, TGFB2, WNT5A]
cellular process involved in reproduction in multicellular organism	15	[CAPZA3, CTNNB1, H3F3A, INHBA, KIT, NPM2, PAFAH1B1, PRM2, ROPN1, SPEM1, TNP1, TNP2, TSSK6, UBE2B, UBE2J1]
reproductive structure development	15	[BCL2L11, CITED2, CTNNB1, DEDD, FKBP4, GATA3, H3F3A, INHBA, KIT, NKX2-1, OSR1, SOD1, SRD5A1, WNT5A, YBX3]
axonogenesis	15	[DLX5, DPYSL2, EFNA1, FOXP1, GAP43, GATA3, KIF5C, NKX2-1, NR4A3, PAFAH1B1, PAK1, RAB11A, RPL24, STMN1, WNT5A]
myelin sheath	14	[ACTB, ACTG1, CA2, DPYSL2, EZR, GLUL, GPI, HSP90AA1, LDHB, PHGDH, RDX, SLC25A3, TUBB4B, UBA52]
regulation of vesicle-mediated transport	14	[ARF1, EZR, HMGB1, HNRNPK, LAMP1, LGALS3, RAB11A, RAB15, RACK1, RAP1B, RDX, RIMS2, VPS41, WNT5A]
ubiquitin ligase complex	14	[ARIH1, C26H10orf120, DCAF12, DCAF5, DCUN1D1, DCUN1D5, FBXO8, MPHOSPH8, RNF11, SKP1, UBE2B, UBE2D2, UBE2N, UBE2V1]
nucleoside binding	14	[ARF1, ARL4A, ATL3, EEF1A1, EEF2, FKBP4, IRGC, RAB11A, RAB15, RAC1, RAP1B, RHOA, SUCLG2, TUBB4B]
purine nucleoside binding	14	[ARF1, ARL4A, ATL3, EEF1A1, EEF2, FKBP4, IRGC, RAB11A, RAB15, RAC1, RAP1B, RHOA, SUCLG2, TUBB4B]
ribonucleoside binding	14	[ARF1, ARL4A, ATL3, EEF1A1, EEF2, FKBP4, IRGC, RAB11A, RAB15, RAC1, RAP1B, RHOA, SUCLG2, TUBB4B]
purine ribonucleoside binding	14	[ARF1, ARL4A, ATL3, EEF1A1, EEF2, FKBP4, IRGC, RAB11A, RAB15, RAC1, RAP1B, RHOA, SUCLG2, TUBB4B]
GTP binding	14	[ARF1, ARL4A, ATL3, EEF1A1, EEF2, FKBP4, IRGC, RAB11A, RAB15, RAC1, RAP1B, RHOA, SUCLG2, TUBB4B]
cytoplasmic ribonucleoprotein granule	14	[ACTB, CNOT7, EIF4E, HABP4, HNRNPU, LSM14A, LSM2, MCRIP1, PABPC1, PCBP1, POLR2D, RAC1, RPLP0, YBX1]
positive regulation of protein transport	14	[EZR, GATA3, GPI, HMGB1, HSPA1L, OAZ1, PCNT, RACK1, RUVBL1, SERP1, TGFB2, UBL4B, WNT5A, YWHAE]
monosaccharide metabolic process	14	[ALDH5A1, ATF4, FBP1, GAPDH, GAPDHS, GPI, GSTO2, HMGB1, PGAM2, PGP, SDHAF3, SERP1, SORD, TPI1]
regulation of binding	14	[CTNNB1, EIF3E, FKBP1A, GATA3, HABP4, HAND2, HMGB1, JUN, RPL11, S100A10, STMN1, SUMO1, TAF10, WNT5A]
embryonic organ morphogenesis	14	[CITED2, CTNNB1, DLX5, EFNA1, EIF4A3, GATA3, HAND2, INSIG2, NR4A3, OSR1, PRRX1, RPL38, SOD1, WNT5A]
transcription factor complex	14	[ATF4, CTNNB1, ELMSAN1, GATA3, GTF2F2, HAND2, HNRNPU, JUN, LMO4, MEIS1, NKX2-1, NR4A3, TAF10, TAF12]
Oxidative phosphorylation	14	[ATP6V1C1, ATP6V1F, COX1, COX3, COX4I1, COX7A2, COX7A2L, COX7B, LOC101902937, LOC782270, MGC148714, NDUFA5, NDUFB2, SDHB]
embryonic organ morphogenesis	14	[CITED2, CTNNB1, DLX5, EFNA1, EIF4A3, GATA3, HAND2, INSIG2, NR4A3, OSR1, PRRX1, RPL38, SOD1, WNT5A]
monosaccharide metabolic process	14	[ALDH5A1, ATF4, FBP1, GAPDH, GAPDHS, GPI, GSTO2, HMGB1, PGAM2, PGP, SDHAF3, SERP1, SORD, TPI1]
RNA splicing, via transesterification reactions	14	[DDX5, EIF4A3, HNRNPK, HNRNPL, HNRNPU, KHDRBS3, LSM2, NOVA1, SF3B6, SLU7, SRPK2, SRSF3, SRSF9, TRA2B]
RNA splicing, via transesterification reactions with bulged adenosine as nucleophile	14	[DDX5, EIF4A3, HNRNPK, HNRNPL, HNRNPU, KHDRBS3, LSM2, NOVA1, SF3B6, SLU7, SRPK2, SRSF3, SRSF9, TRA2B]
mRNA splicing, via spliceosome	14	[DDX5, EIF4A3, HNRNPK, HNRNPL, HNRNPU, KHDRBS3, LSM2, NOVA1, SF3B6, SLU7, SRPK2, SRSF3, SRSF9, TRA2B]
ameboidal-type cell migration	14	[CFL1, EFNA1, GATA3, HAND2, HMGB1, HSPB1, JUN, KIT, PAFAH1B1, PTP4A2, RAB11A, RHOA, TGFB2, WNT5A]
cytoplasmic ribonucleoprotein granule	14	[ACTB, CNOT7, EIF4E, HABP4, HNRNPU, LSM14A, LSM2, MCRIP1, PABPC1, PCBP1, POLR2D, RAC1, RPLP0, YBX1]
Fluid shear stress and atherosclerosis	14	[ACTB, ACTG1, CALM1, CALM2, CALM3, CTNNB1, GSTM1, GSTO2, HSP90AA1, JUN, RAC1, RHOA, SUMO1, SUMO2]
transcription factor complex	14	[ATF4, CTNNB1, ELMSAN1, GATA3, GTF2F2, HAND2, HNRNPU, JUN, LMO4, MEIS1, NKX2-1, NR4A3, TAF10, TAF12]
ameboidal-type cell migration	14	[CFL1, EFNA1, GATA3, HAND2, HMGB1, HSPB1, JUN, KIT, PAFAH1B1, PTP4A2, RAB11A, RHOA, TGFB2, WNT5A]
positive regulation of protein transport	14	[EZR, GATA3, GPI, HMGB1, HSPA1L, OAZ1, PCNT, RACK1, RUVBL1, SERP1, TGFB2, UBL4B, WNT5A, YWHAE]
cytoplasmic region	14	[ACTB, CAPZA2, CAPZA3, CAPZB, CFL1, CTNNB1, EZR, GABARAP, HSPB1, LANCL2, PAFAH1B1, RDX, RHOA, SOD1]
aromatic compound catabolic process	14	[ASPDH, CNOT7, CSDE1, DDX5, EIF3E, EIF4A3, HNRNPU, PABPC1, POLR2D, RACK1, RNASEH1, SOD1, SYNCRIP, YBX1]
nucleobase-containing compound catabolic process	14	[ASPDH, CNOT7, CSDE1, DDX5, EIF3E, EIF4A3, HNRNPU, PABPC1, POLR2D, RACK1, RNASEH1, SOD1, SYNCRIP, YBX1]
regulation of binding	14	[CTNNB1, EIF3E, FKBP1A, GATA3, HABP4, HAND2, HMGB1, JUN, RPL11, S100A10, STMN1, SUMO1, TAF10, WNT5A]
transcription factor complex	14	[ATF4, CTNNB1, ELMSAN1, GATA3, GTF2F2, HAND2, HNRNPU, JUN, LMO4, MEIS1, NKX2-1, NR4A3, TAF10, TAF12]
embryonic organ morphogenesis	14	[CITED2, CTNNB1, DLX5, EFNA1, EIF4A3, GATA3, HAND2, INSIG2, NR4A3, OSR1, PRRX1, RPL38, SOD1, WNT5A]
ameboidal-type cell migration	14	[CFL1, EFNA1, GATA3, HAND2, HMGB1, HSPB1, JUN, KIT, PAFAH1B1, PTP4A2, RAB11A, RHOA, TGFB2, WNT5A]
purine nucleoside monophosphate metabolic process	14	[AK1, COX1, COX4I1, COX7A2L, ENO1, FBP1, GAPDH, GAPDHS, GPI, NCOR1, PGAM2, PKM, PPARGC1A, TPI1]
purine nucleoside triphosphate metabolic process	14	[AK1, COX1, COX4I1, COX7A2L, ENO1, FBP1, GAPDH, GAPDHS, GPI, NCOR1, PGAM2, PKM, PPARGC1A, TPI1]
ATP metabolic process	14	[AK1, COX1, COX4I1, COX7A2L, ENO1, FBP1, GAPDH, GAPDHS, GPI, NCOR1, PGAM2, PKM, PPARGC1A, TPI1]
purine ribonucleoside monophosphate metabolic process	14	[AK1, COX1, COX4I1, COX7A2L, ENO1, FBP1, GAPDH, GAPDHS, GPI, NCOR1, PGAM2, PKM, PPARGC1A, TPI1]
purine ribonucleoside triphosphate metabolic process	14	[AK1, COX1, COX4I1, COX7A2L, ENO1, FBP1, GAPDH, GAPDHS, GPI, NCOR1, PGAM2, PKM, PPARGC1A, TPI1]
regulation of intrinsic apoptotic signaling pathway	14	[ANKRD2, BAG5, CD44, GSDME, HNRNPK, HSPB1, RACK1, RPL11, RPL26, RPS3, RPS7, UBA52, UBB, YBX3]
regulation of neuron projection development	14	[BAG5, CFL1, DPYSL2, EFNA1, FKBP1A, FKBP4, GATA3, PAFAH1B1, PAK1, PRRX1, RAB11A, RIMS2, VIM, WNT5A]
sex differentiation	14	[BCL2L11, CITED2, CTNNB1, FKBP4, GATA3, H3F3A, INHBA, KIT, NKX2-1, OSR1, SOD1, SRD5A1, WNT5A, YBX3]
transcription factor complex	14	[ATF4, CTNNB1, ELMSAN1, GATA3, GTF2F2, HAND2, HNRNPU, JUN, LMO4, MEIS1, NKX2-1, NR4A3, TAF10, TAF12]
regulation of neuron projection development	14	[BAG5, CFL1, DPYSL2, EFNA1, FKBP1A, FKBP4, GATA3, PAFAH1B1, PAK1, PRRX1, RAB11A, RIMS2, VIM, WNT5A]
cytoplasmic region	14	[ACTB, CAPZA2, CAPZA3, CAPZB, CFL1, CTNNB1, EZR, GABARAP, HSPB1, LANCL2, PAFAH1B1, RDX, RHOA, SOD1]
positive regulation of protein transport	14	[EZR, GATA3, GPI, HMGB1, HSPA1L, OAZ1, PCNT, RACK1, RUVBL1, SERP1, TGFB2, UBL4B, WNT5A, YWHAE]
embryonic organ morphogenesis	14	[CITED2, CTNNB1, DLX5, EFNA1, EIF4A3, GATA3, HAND2, INSIG2, NR4A3, OSR1, PRRX1, RPL38, SOD1, WNT5A]
transcription factor complex	14	[ATF4, CTNNB1, ELMSAN1, GATA3, GTF2F2, HAND2, HNRNPU, JUN, LMO4, MEIS1, NKX2-1, NR4A3, TAF10, TAF12]
Oxidative phosphorylation	14	[ATP6V1C1, ATP6V1F, COX1, COX3, COX4I1, COX7A2, COX7A2L, COX7B, LOC101902937, LOC782270, MGC148714, NDUFA5, NDUFB2, SDHB]
regulation of neuron projection development	14	[BAG5, CFL1, DPYSL2, EFNA1, FKBP1A, FKBP4, GATA3, PAFAH1B1, PAK1, PRRX1, RAB11A, RIMS2, VIM, WNT5A]
Fluid shear stress and atherosclerosis	14	[ACTB, ACTG1, CALM1, CALM2, CALM3, CTNNB1, GSTM1, GSTO2, HSP90AA1, JUN, RAC1, RHOA, SUMO1, SUMO2]
ameboidal-type cell migration	14	[CFL1, EFNA1, GATA3, HAND2, HMGB1, HSPB1, JUN, KIT, PAFAH1B1, PTP4A2, RAB11A, RHOA, TGFB2, WNT5A]
regulation of neuron projection development	14	[BAG5, CFL1, DPYSL2, EFNA1, FKBP1A, FKBP4, GATA3, PAFAH1B1, PAK1, PRRX1, RAB11A, RIMS2, VIM, WNT5A]
ameboidal-type cell migration	14	[CFL1, EFNA1, GATA3, HAND2, HMGB1, HSPB1, JUN, KIT, PAFAH1B1, PTP4A2, RAB11A, RHOA, TGFB2, WNT5A]
sex differentiation	14	[BCL2L11, CITED2, CTNNB1, FKBP4, GATA3, H3F3A, INHBA, KIT, NKX2-1, OSR1, SOD1, SRD5A1, WNT5A, YBX3]
germ cell development	14	[CAPZA3, CTNNB1, H3F3A, KIT, NPM2, PAFAH1B1, PRM2, ROPN1, SPEM1, TNP1, TNP2, TSSK6, UBE2B, UBE2J1]
cytoplasmic translation	14	[RPL13A, RPL22, RPL26, RPL29, RPL31, RPL35A, RPL36, RPL6, RPL7, RPL8, RPLP1, RPS20, RPS3, RPS7]
aromatic compound catabolic process	14	[ASPDH, CNOT7, CSDE1, DDX5, EIF3E, EIF4A3, HNRNPU, PABPC1, POLR2D, RACK1, RNASEH1, SOD1, SYNCRIP, YBX1]
nucleobase-containing compound catabolic process	14	[ASPDH, CNOT7, CSDE1, DDX5, EIF3E, EIF4A3, HNRNPU, PABPC1, POLR2D, RACK1, RNASEH1, SOD1, SYNCRIP, YBX1]
cytoplasmic ribonucleoprotein granule	14	[ACTB, CNOT7, EIF4E, HABP4, HNRNPU, LSM14A, LSM2, MCRIP1, PABPC1, PCBP1, POLR2D, RAC1, RPLP0, YBX1]
regulation of mRNA metabolic process	14	[CNOT7, DDX5, EIF4A3, HNRNPK, HNRNPL, HNRNPU, KHDRBS3, PABPC1, SRPK2, SRSF3, SRSF9, SYNCRIP, TRA2B, YBX1]
RNA splicing, via transesterification reactions	14	[DDX5, EIF4A3, HNRNPK, HNRNPL, HNRNPU, KHDRBS3, LSM2, NOVA1, SF3B6, SLU7, SRPK2, SRSF3, SRSF9, TRA2B]
RNA splicing, via transesterification reactions with bulged adenosine as nucleophile	14	[DDX5, EIF4A3, HNRNPK, HNRNPL, HNRNPU, KHDRBS3, LSM2, NOVA1, SF3B6, SLU7, SRPK2, SRSF3, SRSF9, TRA2B]
mRNA splicing, via spliceosome	14	[DDX5, EIF4A3, HNRNPK, HNRNPL, HNRNPU, KHDRBS3, LSM2, NOVA1, SF3B6, SLU7, SRPK2, SRSF3, SRSF9, TRA2B]
Fluid shear stress and atherosclerosis	14	[ACTB, ACTG1, CALM1, CALM2, CALM3, CTNNB1, GSTM1, GSTO2, HSP90AA1, JUN, RAC1, RHOA, SUMO1, SUMO2]
ubiquitin ligase complex	14	[ARIH1, C26H10orf120, DCAF12, DCAF5, DCUN1D1, DCUN1D5, FBXO8, MPHOSPH8, RNF11, SKP1, UBE2B, UBE2D2, UBE2N, UBE2V1]
aromatic compound catabolic process	14	[ASPDH, CNOT7, CSDE1, DDX5, EIF3E, EIF4A3, HNRNPU, PABPC1, POLR2D, RACK1, RNASEH1, SOD1, SYNCRIP, YBX1]
nucleobase-containing compound catabolic process	14	[ASPDH, CNOT7, CSDE1, DDX5, EIF3E, EIF4A3, HNRNPU, PABPC1, POLR2D, RACK1, RNASEH1, SOD1, SYNCRIP, YBX1]
regulation of intrinsic apoptotic signaling pathway	14	[ANKRD2, BAG5, CD44, GSDME, HNRNPK, HSPB1, RACK1, RPL11, RPL26, RPS3, RPS7, UBA52, UBB, YBX3]
transcription factor complex	14	[ATF4, CTNNB1, ELMSAN1, GATA3, GTF2F2, HAND2, HNRNPU, JUN, LMO4, MEIS1, NKX2-1, NR4A3, TAF10, TAF12]
regulation of microtubule-based process	14	[BICD2, CAPZB, CHMP5, CTNNB1, FKBP4, HNRNPU, HSPA1A, LAMP1, PAFAH1B1, PAK1, RAC1, RPS3, STMN1, TRIM36]
nuclear division	14	[ACTR3, CHMP5, HNRNPU, HSPA1A, KIF22, KIF2C, NPM2, RAB11A, RAD21, RHOA, RPL24, SLF1, UBE2B, WNT5A]
ameboidal-type cell migration	14	[CFL1, EFNA1, GATA3, HAND2, HMGB1, HSPB1, JUN, KIT, PAFAH1B1, PTP4A2, RAB11A, RHOA, TGFB2, WNT5A]
regulation of intrinsic apoptotic signaling pathway	14	[ANKRD2, BAG5, CD44, GSDME, HNRNPK, HSPB1, RACK1, RPL11, RPL26, RPS3, RPS7, UBA52, UBB, YBX3]
ameboidal-type cell migration	14	[CFL1, EFNA1, GATA3, HAND2, HMGB1, HSPB1, JUN, KIT, PAFAH1B1, PTP4A2, RAB11A, RHOA, TGFB2, WNT5A]
regulation of neuron projection development	14	[BAG5, CFL1, DPYSL2, EFNA1, FKBP1A, FKBP4, GATA3, PAFAH1B1, PAK1, PRRX1, RAB11A, RIMS2, VIM, WNT5A]
monosaccharide metabolic process	14	[ALDH5A1, ATF4, FBP1, GAPDH, GAPDHS, GPI, GSTO2, HMGB1, PGAM2, PGP, SDHAF3, SERP1, SORD, TPI1]
purine nucleoside monophosphate metabolic process	14	[AK1, COX1, COX4I1, COX7A2L, ENO1, FBP1, GAPDH, GAPDHS, GPI, NCOR1, PGAM2, PKM, PPARGC1A, TPI1]
purine nucleoside triphosphate metabolic process	14	[AK1, COX1, COX4I1, COX7A2L, ENO1, FBP1, GAPDH, GAPDHS, GPI, NCOR1, PGAM2, PKM, PPARGC1A, TPI1]
ATP metabolic process	14	[AK1, COX1, COX4I1, COX7A2L, ENO1, FBP1, GAPDH, GAPDHS, GPI, NCOR1, PGAM2, PKM, PPARGC1A, TPI1]
purine ribonucleoside monophosphate metabolic process	14	[AK1, COX1, COX4I1, COX7A2L, ENO1, FBP1, GAPDH, GAPDHS, GPI, NCOR1, PGAM2, PKM, PPARGC1A, TPI1]
purine ribonucleoside triphosphate metabolic process	14	[AK1, COX1, COX4I1, COX7A2L, ENO1, FBP1, GAPDH, GAPDHS, GPI, NCOR1, PGAM2, PKM, PPARGC1A, TPI1]
ameboidal-type cell migration	14	[CFL1, EFNA1, GATA3, HAND2, HMGB1, HSPB1, JUN, KIT, PAFAH1B1, PTP4A2, RAB11A, RHOA, TGFB2, WNT5A]
positive regulation of protein transport	14	[EZR, GATA3, GPI, HMGB1, HSPA1L, OAZ1, PCNT, RACK1, RUVBL1, SERP1, TGFB2, UBL4B, WNT5A, YWHAE]
regulation of microtubule-based process	14	[BICD2, CAPZB, CHMP5, CTNNB1, FKBP4, HNRNPU, HSPA1A, LAMP1, PAFAH1B1, PAK1, RAC1, RPS3, STMN1, TRIM36]
cytoplasmic region	14	[ACTB, CAPZA2, CAPZA3, CAPZB, CFL1, CTNNB1, EZR, GABARAP, HSPB1, LANCL2, PAFAH1B1, RDX, RHOA, SOD1]
Fluid shear stress and atherosclerosis	14	[ACTB, ACTG1, CALM1, CALM2, CALM3, CTNNB1, GSTM1, GSTO2, HSP90AA1, JUN, RAC1, RHOA, SUMO1, SUMO2]
regulation of binding	14	[CTNNB1, EIF3E, FKBP1A, GATA3, HABP4, HAND2, HMGB1, JUN, RPL11, S100A10, STMN1, SUMO1, TAF10, WNT5A]
sex differentiation	14	[BCL2L11, CITED2, CTNNB1, FKBP4, GATA3, H3F3A, INHBA, KIT, NKX2-1, OSR1, SOD1, SRD5A1, WNT5A, YBX3]
transcription factor complex	14	[ATF4, CTNNB1, ELMSAN1, GATA3, GTF2F2, HAND2, HNRNPU, JUN, LMO4, MEIS1, NKX2-1, NR4A3, TAF10, TAF12]
regulation of vesicle-mediated transport	14	[ARF1, EZR, HMGB1, HNRNPK, LAMP1, LGALS3, RAB11A, RAB15, RACK1, RAP1B, RDX, RIMS2, VPS41, WNT5A]
ameboidal-type cell migration	14	[CFL1, EFNA1, GATA3, HAND2, HMGB1, HSPB1, JUN, KIT, PAFAH1B1, PTP4A2, RAB11A, RHOA, TGFB2, WNT5A]
embryonic organ morphogenesis	14	[CITED2, CTNNB1, DLX5, EFNA1, EIF4A3, GATA3, HAND2, INSIG2, NR4A3, OSR1, PRRX1, RPL38, SOD1, WNT5A]
positive regulation of protein transport	14	[EZR, GATA3, GPI, HMGB1, HSPA1L, OAZ1, PCNT, RACK1, RUVBL1, SERP1, TGFB2, UBL4B, WNT5A, YWHAE]
regulation of neuron projection development	14	[BAG5, CFL1, DPYSL2, EFNA1, FKBP1A, FKBP4, GATA3, PAFAH1B1, PAK1, PRRX1, RAB11A, RIMS2, VIM, WNT5A]
regulation of intracellular transport	13	[CDH3, EZR, HSPA1L, LAMP1, OAZ1, PCNT, RAP1B, RDX, REEP6, RIMS2, RUVBL1, UBE2J1, UBL4B]
regulation of neuron death	13	[ATF4, BCL2L11, CTNNB1, GATA3, JUN, NR4A3, PPARGC1A, RACK1, RETREG1, SOD1, TGFB2, UBA52, UBB]
RNA transport	13	[EEF1A1, EIF1, EIF3E, EIF3I, EIF4A3, EIF4E, EIF4G2, EIF5, FXR1, LOC100299503, PABPC1, SUMO1, SUMO2]
microtubule-based movement	13	[ACTR3, BICD2, DYNLL1, DYNLL2, HSPB1, KIF22, KIF2C, KIF5C, LAMP1, PAFAH1B1, TEKT1, UBA52, UBB]
cellular response to oxidative stress	13	[ANKRD2, ATF4, BAG5, CTNNB1, HSPB1, JUN, NR4A3, PPARGC1A, PRDX5, RACK1, ROMO1, RPS3, SOD1]
regulation of intracellular transport	13	[CDH3, EZR, HSPA1L, LAMP1, OAZ1, PCNT, RAP1B, RDX, REEP6, RIMS2, RUVBL1, UBE2J1, UBL4B]
hexose metabolic process	13	[ALDH5A1, ATF4, FBP1, GAPDH, GAPDHS, GPI, HMGB1, PGAM2, PGP, SDHAF3, SERP1, SORD, TPI1]
positive regulation of supramolecular fiber organization	13	[ACTR3, ARF1, ARPC1A, ARPC2, ARPC4, CFL1, HSPA1A, PAK1, PFN1, RAC1, RHOA, RPS3, S100A10]
positive regulation of cytoskeleton organization	13	[ACTR3, ARF1, ARPC1A, ARPC2, ARPC4, CFL1, HSPA1A, PAK1, PFN1, RAC1, RHOA, RPS3, S100A10]
RNA transport	13	[EEF1A1, EIF1, EIF3E, EIF3I, EIF4A3, EIF4E, EIF4G2, EIF5, FXR1, LOC100299503, PABPC1, SUMO1, SUMO2]
regulation of protein modification by small protein conjugation or removal	13	[BAG5, CTNNB1, DCUN1D1, DCUN1D5, FKBP1A, HSP90AA1, PELI1, RPL11, RPS3, RPS7, UBA52, UBB, UBE2N]
regulation of cell-cell adhesion	13	[CD44, CITED2, CTNNB1, GATA3, HAS2, HMGB1, LGALS3, NR4A3, PELI1, RDX, RPS3, TNFRSF21, WNT5A]
nuclear envelope	13	[BICD2, EIF5A, JPT1, LMNB2, PAFAH1B1, PLCD4, SPAG4, SPIN1, SUMO1, TRA2B, UBXN4, UTP18, YBX1]
organic hydroxy compound metabolic process	13	[CDH3, DKKL1, FDX1, GATA3, HAND2, INSIG2, NPC2, PGP, QDPR, SOD1, SORD, TPI1, WNT5A]
microtubule-based movement	13	[ACTR3, BICD2, DYNLL1, DYNLL2, HSPB1, KIF22, KIF2C, KIF5C, LAMP1, PAFAH1B1, TEKT1, UBA52, UBB]
regulation of protein modification by small protein conjugation or removal	13	[BAG5, CTNNB1, DCUN1D1, DCUN1D5, FKBP1A, HSP90AA1, PELI1, RPL11, RPS3, RPS7, UBA52, UBB, UBE2N]
tube morphogenesis	13	[BCL2L11, CFL1, CITED2, CTNNB1, GATA3, HAND2, LMO4, NKX2-1, NR4A3, OSR1, PAK1, RHOA, WNT5A]
tube morphogenesis	13	[BCL2L11, CFL1, CITED2, CTNNB1, GATA3, HAND2, LMO4, NKX2-1, NR4A3, OSR1, PAK1, RHOA, WNT5A]
cellular response to oxidative stress	13	[ANKRD2, ATF4, BAG5, CTNNB1, HSPB1, JUN, NR4A3, PPARGC1A, PRDX5, RACK1, ROMO1, RPS3, SOD1]
neuron apoptotic process	13	[ATF4, BCL2L11, CTNNB1, GAPDH, GATA3, JUN, NR4A3, POLB, PPARGC1A, RETREG1, SOD1, TGFB2, TNFRSF21]
regulation of neuron death	13	[ATF4, BCL2L11, CTNNB1, GATA3, JUN, NR4A3, PPARGC1A, RACK1, RETREG1, SOD1, TGFB2, UBA52, UBB]
hexose metabolic process	13	[ALDH5A1, ATF4, FBP1, GAPDH, GAPDHS, GPI, HMGB1, PGAM2, PGP, SDHAF3, SERP1, SORD, TPI1]
cellular response to oxidative stress	13	[ANKRD2, ATF4, BAG5, CTNNB1, HSPB1, JUN, NR4A3, PPARGC1A, PRDX5, RACK1, ROMO1, RPS3, SOD1]
neuron apoptotic process	13	[ATF4, BCL2L11, CTNNB1, GAPDH, GATA3, JUN, NR4A3, POLB, PPARGC1A, RETREG1, SOD1, TGFB2, TNFRSF21]
regulation of neuron death	13	[ATF4, BCL2L11, CTNNB1, GATA3, JUN, NR4A3, PPARGC1A, RACK1, RETREG1, SOD1, TGFB2, UBA52, UBB]
spliceosomal complex	13	[CTNNBL1, DDX5, EIF4A3, HNRNPH1, HNRNPK, HNRNPU, LSM2, PABPC1, SF3B6, SLU7, SYNCRIP, TRA2B, YBX1]
positive regulation of supramolecular fiber organization	13	[ACTR3, ARF1, ARPC1A, ARPC2, ARPC4, CFL1, HSPA1A, PAK1, PFN1, RAC1, RHOA, RPS3, S100A10]
positive regulation of cytoskeleton organization	13	[ACTR3, ARF1, ARPC1A, ARPC2, ARPC4, CFL1, HSPA1A, PAK1, PFN1, RAC1, RHOA, RPS3, S100A10]
response to wounding	13	[ACTB, ACTG1, CD44, FKBP1A, HMGB1, HSPB1, JUN, LBH, PAK1, RHOA, SOD1, TGFB2, WNT5A]
regulation of intracellular transport	13	[CDH3, EZR, HSPA1L, LAMP1, OAZ1, PCNT, RAP1B, RDX, REEP6, RIMS2, RUVBL1, UBE2J1, UBL4B]
response to wounding	13	[ACTB, ACTG1, CD44, FKBP1A, HMGB1, HSPB1, JUN, LBH, PAK1, RHOA, SOD1, TGFB2, WNT5A]
ciliary part	13	[AK1, CABYR, CEP41, CETN1, EZR, GABARAP, GPI, KIF5C, ODF1, ODF2, ROPN1, SPA17, SPATA6]
neuron apoptotic process	13	[ATF4, BCL2L11, CTNNB1, GAPDH, GATA3, JUN, NR4A3, POLB, PPARGC1A, RETREG1, SOD1, TGFB2, TNFRSF21]
regulation of neuron death	13	[ATF4, BCL2L11, CTNNB1, GATA3, JUN, NR4A3, PPARGC1A, RACK1, RETREG1, SOD1, TGFB2, UBA52, UBB]
regulation of cell-cell adhesion	13	[CD44, CITED2, CTNNB1, GATA3, HAS2, HMGB1, LGALS3, NR4A3, PELI1, RDX, RPS3, TNFRSF21, WNT5A]
immune response-regulating signaling pathway	13	[EZR, GATA3, HMGB1, KIT, LPXN, LSM14A, NR4A3, PELI1, PHPT1, RPS3, S100A14, TNFRSF21, UBE2N]
electron transport chain	13	[ALDH5A1, COX1, COX3, COX4I1, COX7A2, COX7A2L, COX7B, FDX1, NDUFA5, POLG2, PPARGC1A, SDHB, SH3BGRL3]
response to wounding	13	[ACTB, ACTG1, CD44, FKBP1A, HMGB1, HSPB1, JUN, LBH, PAK1, RHOA, SOD1, TGFB2, WNT5A]
cellular response to oxidative stress	13	[ANKRD2, ATF4, BAG5, CTNNB1, HSPB1, JUN, NR4A3, PPARGC1A, PRDX5, RACK1, ROMO1, RPS3, SOD1]
regulation of protein modification by small protein conjugation or removal	13	[BAG5, CTNNB1, DCUN1D1, DCUN1D5, FKBP1A, HSP90AA1, PELI1, RPL11, RPS3, RPS7, UBA52, UBB, UBE2N]
microtubule-based movement	13	[ACTR3, BICD2, DYNLL1, DYNLL2, HSPB1, KIF22, KIF2C, KIF5C, LAMP1, PAFAH1B1, TEKT1, UBA52, UBB]
regulation of proteolysis involved in cellular protein catabolic process	13	[ARIH1, BAG5, EFNA1, MGC137055, PSME1, PSMF1, RACK1, RPL11, RPS7, SUMO1, UBA52, UBB, UBE2J1]
tube morphogenesis	13	[BCL2L11, CFL1, CITED2, CTNNB1, GATA3, HAND2, LMO4, NKX2-1, NR4A3, OSR1, PAK1, RHOA, WNT5A]
tube morphogenesis	13	[BCL2L11, CFL1, CITED2, CTNNB1, GATA3, HAND2, LMO4, NKX2-1, NR4A3, OSR1, PAK1, RHOA, WNT5A]
microtubule-based movement	13	[ACTR3, BICD2, DYNLL1, DYNLL2, HSPB1, KIF22, KIF2C, KIF5C, LAMP1, PAFAH1B1, TEKT1, UBA52, UBB]
organic hydroxy compound metabolic process	13	[CDH3, DKKL1, FDX1, GATA3, HAND2, INSIG2, NPC2, PGP, QDPR, SOD1, SORD, TPI1, WNT5A]
tube morphogenesis	13	[BCL2L11, CFL1, CITED2, CTNNB1, GATA3, HAND2, LMO4, NKX2-1, NR4A3, OSR1, PAK1, RHOA, WNT5A]
electron transport chain	13	[ALDH5A1, COX1, COX3, COX4I1, COX7A2, COX7A2L, COX7B, FDX1, NDUFA5, POLG2, PPARGC1A, SDHB, SH3BGRL3]
negative regulation of transport	13	[EZR, FKBP1A, HMGB1, LGALS3, OAZ1, OSR1, PKIG, RACK1, RAP1B, SUMO1, TNFRSF21, UBE2J1, YWHAE]
regulation of cell-cell adhesion	13	[CD44, CITED2, CTNNB1, GATA3, HAS2, HMGB1, LGALS3, NR4A3, PELI1, RDX, RPS3, TNFRSF21, WNT5A]
neuron apoptotic process	13	[ATF4, BCL2L11, CTNNB1, GAPDH, GATA3, JUN, NR4A3, POLB, PPARGC1A, RETREG1, SOD1, TGFB2, TNFRSF21]
regulation of neuron death	13	[ATF4, BCL2L11, CTNNB1, GATA3, JUN, NR4A3, PPARGC1A, RACK1, RETREG1, SOD1, TGFB2, UBA52, UBB]
positive regulation of supramolecular fiber organization	13	[ACTR3, ARF1, ARPC1A, ARPC2, ARPC4, CFL1, HSPA1A, PAK1, PFN1, RAC1, RHOA, RPS3, S100A10]
positive regulation of cytoskeleton organization	13	[ACTR3, ARF1, ARPC1A, ARPC2, ARPC4, CFL1, HSPA1A, PAK1, PFN1, RAC1, RHOA, RPS3, S100A10]
response to wounding	13	[ACTB, ACTG1, CD44, FKBP1A, HMGB1, HSPB1, JUN, LBH, PAK1, RHOA, SOD1, TGFB2, WNT5A]
spliceosomal complex	13	[CTNNBL1, DDX5, EIF4A3, HNRNPH1, HNRNPK, HNRNPU, LSM2, PABPC1, SF3B6, SLU7, SYNCRIP, TRA2B, YBX1]
positive regulation of supramolecular fiber organization	13	[ACTR3, ARF1, ARPC1A, ARPC2, ARPC4, CFL1, HSPA1A, PAK1, PFN1, RAC1, RHOA, RPS3, S100A10]
positive regulation of cytoskeleton organization	13	[ACTR3, ARF1, ARPC1A, ARPC2, ARPC4, CFL1, HSPA1A, PAK1, PFN1, RAC1, RHOA, RPS3, S100A10]
response to wounding	13	[ACTB, ACTG1, CD44, FKBP1A, HMGB1, HSPB1, JUN, LBH, PAK1, RHOA, SOD1, TGFB2, WNT5A]
positive regulation of supramolecular fiber organization	13	[ACTR3, ARF1, ARPC1A, ARPC2, ARPC4, CFL1, HSPA1A, PAK1, PFN1, RAC1, RHOA, RPS3, S100A10]
positive regulation of cytoskeleton organization	13	[ACTR3, ARF1, ARPC1A, ARPC2, ARPC4, CFL1, HSPA1A, PAK1, PFN1, RAC1, RHOA, RPS3, S100A10]
regulation of proteolysis involved in cellular protein catabolic process	13	[ARIH1, BAG5, EFNA1, MGC137055, PSME1, PSMF1, RACK1, RPL11, RPS7, SUMO1, UBA52, UBB, UBE2J1]
regulation of protein modification by small protein conjugation or removal	13	[BAG5, CTNNB1, DCUN1D1, DCUN1D5, FKBP1A, HSP90AA1, PELI1, RPL11, RPS3, RPS7, UBA52, UBB, UBE2N]
cellular response to oxidative stress	13	[ANKRD2, ATF4, BAG5, CTNNB1, HSPB1, JUN, NR4A3, PPARGC1A, PRDX5, RACK1, ROMO1, RPS3, SOD1]
neuron apoptotic process	13	[ATF4, BCL2L11, CTNNB1, GAPDH, GATA3, JUN, NR4A3, POLB, PPARGC1A, RETREG1, SOD1, TGFB2, TNFRSF21]
regulation of neuron death	13	[ATF4, BCL2L11, CTNNB1, GATA3, JUN, NR4A3, PPARGC1A, RACK1, RETREG1, SOD1, TGFB2, UBA52, UBB]
regulation of microtubule cytoskeleton organization	13	[BICD2, CAPZB, CHMP5, CTNNB1, FKBP4, HNRNPU, HSPA1A, PAFAH1B1, PAK1, RAC1, RPS3, STMN1, TRIM36]
regulation of neuron death	13	[ATF4, BCL2L11, CTNNB1, GATA3, JUN, NR4A3, PPARGC1A, RACK1, RETREG1, SOD1, TGFB2, UBA52, UBB]
regulation of proteolysis involved in cellular protein catabolic process	13	[ARIH1, BAG5, EFNA1, MGC137055, PSME1, PSMF1, RACK1, RPL11, RPS7, SUMO1, UBA52, UBB, UBE2J1]
regulation of protein modification by small protein conjugation or removal	13	[BAG5, CTNNB1, DCUN1D1, DCUN1D5, FKBP1A, HSP90AA1, PELI1, RPL11, RPS3, RPS7, UBA52, UBB, UBE2N]
tube morphogenesis	13	[BCL2L11, CFL1, CITED2, CTNNB1, GATA3, HAND2, LMO4, NKX2-1, NR4A3, OSR1, PAK1, RHOA, WNT5A]
organic hydroxy compound metabolic process	13	[CDH3, DKKL1, FDX1, GATA3, HAND2, INSIG2, NPC2, PGP, QDPR, SOD1, SORD, TPI1, WNT5A]
electron transport chain	13	[ALDH5A1, COX1, COX3, COX4I1, COX7A2, COX7A2L, COX7B, FDX1, NDUFA5, POLG2, PPARGC1A, SDHB, SH3BGRL3]
hexose metabolic process	13	[ALDH5A1, ATF4, FBP1, GAPDH, GAPDHS, GPI, HMGB1, PGAM2, PGP, SDHAF3, SERP1, SORD, TPI1]
response to wounding	13	[ACTB, ACTG1, CD44, FKBP1A, HMGB1, HSPB1, JUN, LBH, PAK1, RHOA, SOD1, TGFB2, WNT5A]
regulation of cell-cell adhesion	13	[CD44, CITED2, CTNNB1, GATA3, HAS2, HMGB1, LGALS3, NR4A3, PELI1, RDX, RPS3, TNFRSF21, WNT5A]
immune response-regulating signaling pathway	13	[EZR, GATA3, HMGB1, KIT, LPXN, LSM14A, NR4A3, PELI1, PHPT1, RPS3, S100A14, TNFRSF21, UBE2N]
positive regulation of supramolecular fiber organization	13	[ACTR3, ARF1, ARPC1A, ARPC2, ARPC4, CFL1, HSPA1A, PAK1, PFN1, RAC1, RHOA, RPS3, S100A10]
regulation of microtubule cytoskeleton organization	13	[BICD2, CAPZB, CHMP5, CTNNB1, FKBP4, HNRNPU, HSPA1A, PAFAH1B1, PAK1, RAC1, RPS3, STMN1, TRIM36]
positive regulation of cytoskeleton organization	13	[ACTR3, ARF1, ARPC1A, ARPC2, ARPC4, CFL1, HSPA1A, PAK1, PFN1, RAC1, RHOA, RPS3, S100A10]
response to wounding	13	[ACTB, ACTG1, CD44, FKBP1A, HMGB1, HSPB1, JUN, LBH, PAK1, RHOA, SOD1, TGFB2, WNT5A]
organic hydroxy compound metabolic process	13	[CDH3, DKKL1, FDX1, GATA3, HAND2, INSIG2, NPC2, PGP, QDPR, SOD1, SORD, TPI1, WNT5A]
regulation of cell-cell adhesion	13	[CD44, CITED2, CTNNB1, GATA3, HAS2, HMGB1, LGALS3, NR4A3, PELI1, RDX, RPS3, TNFRSF21, WNT5A]
immune response-regulating signaling pathway	13	[EZR, GATA3, HMGB1, KIT, LPXN, LSM14A, NR4A3, PELI1, PHPT1, RPS3, S100A14, TNFRSF21, UBE2N]
tube morphogenesis	13	[BCL2L11, CFL1, CITED2, CTNNB1, GATA3, HAND2, LMO4, NKX2-1, NR4A3, OSR1, PAK1, RHOA, WNT5A]
neuron apoptotic process	13	[ATF4, BCL2L11, CTNNB1, GAPDH, GATA3, JUN, NR4A3, POLB, PPARGC1A, RETREG1, SOD1, TGFB2, TNFRSF21]
regulation of neuron death	13	[ATF4, BCL2L11, CTNNB1, GATA3, JUN, NR4A3, PPARGC1A, RACK1, RETREG1, SOD1, TGFB2, UBA52, UBB]
Protein processing in endoplasmic reticulum	12	[ATF4, BAG1, DNAJB1, HSP90AA1, HSPA1A, HSPA1L, SEC61B, SKP1, SSR2, UBE2D2, UBE2J1, UBXN6]
Epstein-Barr virus infection	12	[ADRM1, CD44, HSPA1A, HSPA1L, HSPB1, JUN, POLR2D, PTMA, VIM, YWHAE, YWHAQ, YWHAZ]
rRNA binding	12	[NSUN4, RPL11, RPL12, RPL23, RPL37, RPL5, RPL8, RPS11, RPS18, RPS3, RPS5, RPS9]
protein targeting	12	[BICD2, HSP90AA1, HSPA1L, RPL11, RUVBL1, SEC61B, SSR2, UBL4B, VPS41, YWHAE, YWHAQ, YWHAZ]
positive regulation of apoptotic signaling pathway	12	[APOPT1, BCL2L11, GSDME, INHBA, MLLT11, RACK1, RPL11, RPL26, RPS3, RPS7, UBA52, UBB]
contractile fiber	12	[ACTG1, ANKRD2, ARF1, CAPZB, CTNNB1, FKBP1A, FXR1, HABP4, HSPB1, JPH1, MYL12A, TPM3]
myofibril	12	[ACTG1, ANKRD2, ARF1, CAPZB, CTNNB1, FKBP1A, FXR1, HABP4, HSPB1, JPH1, MYL12A, TPM3]
ribosomal small subunit biogenesis	12	[RPL38, RPS15, RPS16, RPS17, RPS19, RPS28, RPS5, RPS6, RPS7, RPS8, RPSA, UTP18]
ribosomal small subunit biogenesis	12	[RPL38, RPS15, RPS16, RPS17, RPS19, RPS28, RPS5, RPS6, RPS7, RPS8, RPSA, UTP18]
MAPK signaling pathway	12	[ATF4, EFNA1, HSPA1A, HSPA1L, HSPB1, JUN, KIT, PAK1, RAC1, RAP1B, STMN1, TGFB2]
ubiquitin-like protein ligase activity	12	[ARIH1, CDC34, LTN1, PELI1, RNF11, UBE2B, UBE2F, UBE2J1, UBE2N, UBE2R2, UBE2V1, ZNRF1]
ubiquitin protein ligase activity	12	[ARIH1, CDC34, LTN1, PELI1, RNF11, UBE2B, UBE2F, UBE2J1, UBE2N, UBE2R2, UBE2V1, ZNRF1]
ribosomal small subunit biogenesis	12	[RPL38, RPS15, RPS16, RPS17, RPS19, RPS28, RPS5, RPS6, RPS7, RPS8, RPSA, UTP18]
activation of immune response	12	[EZR, GATA3, HMGB1, LPXN, LSM14A, NR4A3, PELI1, PHPT1, RPS3, S100A14, TNFRSF21, UBE2N]
immune response-activating signal transduction	12	[EZR, GATA3, HMGB1, LPXN, LSM14A, NR4A3, PELI1, PHPT1, RPS3, S100A14, TNFRSF21, UBE2N]
RNA polymerase II transcription factor binding	12	[ANKRD2, ATF4, BHLHE41, CHD4, CITED2, CTNNB1, GATA3, HNRNPU, JUN, NCOR1, RUVBL1, TAF12]
mesenchyme development	12	[CFL1, CITED2, CTNNB1, DDX5, EFNA1, HAND2, HAS2, MCRIP1, NKX2-1, OSR1, TGFB2, WNT5A]
mesenchymal cell differentiation	12	[CFL1, CITED2, CTNNB1, DDX5, EFNA1, HAND2, HAS2, MCRIP1, NKX2-1, OSR1, TGFB2, WNT5A]
contractile fiber	12	[ACTG1, ANKRD2, ARF1, CAPZB, CTNNB1, FKBP1A, FXR1, HABP4, HSPB1, JPH1, MYL12A, TPM3]
myofibril	12	[ACTG1, ANKRD2, ARF1, CAPZB, CTNNB1, FKBP1A, FXR1, HABP4, HSPB1, JPH1, MYL12A, TPM3]
response to inorganic substance	12	[CPNE2, FBP1, FKBP1A, JUN, KCNMB1, NR4A3, RACK1, RPS3, SLC30A7, SOD1, SUMO1, WNT5A]
sensory organ morphogenesis	12	[CITED2, CTNNB1, DLX5, GATA3, INSIG2, MEIS1, NR4A3, OSR1, PRRX1, RPL38, SOD1, WNT5A]
ear development	12	[BCL2L11, DLX5, GATA3, GSDME, INSIG2, NR4A3, OSR1, PAFAH1B1, PRRX1, RPL38, SOD1, WNT5A]
RNA polymerase II transcription factor binding	12	[ANKRD2, ATF4, BHLHE41, CHD4, CITED2, CTNNB1, GATA3, HNRNPU, JUN, NCOR1, RUVBL1, TAF12]
regulation of protein ubiquitination	12	[BAG5, DCUN1D1, DCUN1D5, FKBP1A, HSP90AA1, PELI1, RPL11, RPS3, RPS7, UBA52, UBB, UBE2N]
Rap1 signaling pathway	12	[ACTB, ACTG1, CALM1, CALM2, CALM3, CTNNB1, EFNA1, KIT, PFN1, RAC1, RAP1B, RHOA]
Tight junction	12	[ACTB, ACTG1, ACTR3, CLDN2, EZR, JUN, MYL12A, RAC1, RDX, RHOA, TUBA1B, YBX3]
positive regulation of cell adhesion	12	[ARPC2, CD44, CITED2, GATA3, HAS2, HMGB1, NR4A3, RAC1, RPS3, S100A10, TGFB2, WNT5A]
activation of immune response	12	[EZR, GATA3, HMGB1, LPXN, LSM14A, NR4A3, PELI1, PHPT1, RPS3, S100A14, TNFRSF21, UBE2N]
immune response-activating signal transduction	12	[EZR, GATA3, HMGB1, LPXN, LSM14A, NR4A3, PELI1, PHPT1, RPS3, S100A14, TNFRSF21, UBE2N]
cellular carbohydrate metabolic process	12	[FBP1, HAS2, HMGB1, PGAM2, PGP, PHKG2, PPP1CB, PPP1R2, PTGES3, SDHAF3, SORD, TPI1]
ribosomal small subunit biogenesis	12	[RPL38, RPS15, RPS16, RPS17, RPS19, RPS28, RPS5, RPS6, RPS7, RPS8, RPSA, UTP18]
positive regulation of apoptotic signaling pathway	12	[APOPT1, BCL2L11, GSDME, INHBA, MLLT11, RACK1, RPL11, RPL26, RPS3, RPS7, UBA52, UBB]
positive regulation of proteolysis	12	[ADRM1, APOPT1, ARIH1, BCL2L11, EFNA1, HMGB1, PSME1, RACK1, RPS3, SUMO1, TNP1, TNP2]
MAPK signaling pathway	12	[ATF4, EFNA1, HSPA1A, HSPA1L, HSPB1, JUN, KIT, PAK1, RAC1, RAP1B, STMN1, TGFB2]
cAMP signaling pathway	12	[ATP2B1, CALM1, CALM2, CALM3, CAMK2D, CREB3L2, JUN, PAK1, PPP1CB, RAC1, RAP1B, RHOA]
cell projection membrane	12	[ARPC1A, ARPC2, CD44, CFL1, CTNNB1, EZR, GAP43, GPI, HSP90AA1, PAK1, RAC1, RPS3]
cell projection membrane	12	[ARPC1A, ARPC2, CD44, CFL1, CTNNB1, EZR, GAP43, GPI, HSP90AA1, PAK1, RAC1, RPS3]
cAMP signaling pathway	12	[ATP2B1, CALM1, CALM2, CALM3, CAMK2D, CREB3L2, JUN, PAK1, PPP1CB, RAC1, RAP1B, RHOA]
Rap1 signaling pathway	12	[ACTB, ACTG1, CALM1, CALM2, CALM3, CTNNB1, EFNA1, KIT, PFN1, RAC1, RAP1B, RHOA]
cAMP signaling pathway	12	[ATP2B1, CALM1, CALM2, CALM3, CAMK2D, CREB3L2, JUN, PAK1, PPP1CB, RAC1, RAP1B, RHOA]
RNA polymerase II transcription factor binding	12	[ANKRD2, ATF4, BHLHE41, CHD4, CITED2, CTNNB1, GATA3, HNRNPU, JUN, NCOR1, RUVBL1, TAF12]
Tight junction	12	[ACTB, ACTG1, ACTR3, CLDN2, EZR, JUN, MYL12A, RAC1, RDX, RHOA, TUBA1B, YBX3]
motile cilium	12	[AK1, CABS1, CABYR, GABARAP, ODF1, PAFAH1B1, ROPN1, SORD, SPA17, SPATA6, TCP11, TEKT1]
cell projection membrane	12	[ARPC1A, ARPC2, CD44, CFL1, CTNNB1, EZR, GAP43, GPI, HSP90AA1, PAK1, RAC1, RPS3]
mesenchyme development	12	[CFL1, CITED2, CTNNB1, DDX5, EFNA1, HAND2, HAS2, MCRIP1, NKX2-1, OSR1, TGFB2, WNT5A]
mesenchymal cell differentiation	12	[CFL1, CITED2, CTNNB1, DDX5, EFNA1, HAND2, HAS2, MCRIP1, NKX2-1, OSR1, TGFB2, WNT5A]
positive regulation of apoptotic signaling pathway	12	[APOPT1, BCL2L11, GSDME, INHBA, MLLT11, RACK1, RPL11, RPL26, RPS3, RPS7, UBA52, UBB]
positive regulation of proteolysis	12	[ADRM1, APOPT1, ARIH1, BCL2L11, EFNA1, HMGB1, PSME1, RACK1, RPS3, SUMO1, TNP1, TNP2]
sensory organ morphogenesis	12	[CITED2, CTNNB1, DLX5, GATA3, INSIG2, MEIS1, NR4A3, OSR1, PRRX1, RPL38, SOD1, WNT5A]
ear development	12	[BCL2L11, DLX5, GATA3, GSDME, INSIG2, NR4A3, OSR1, PAFAH1B1, PRRX1, RPL38, SOD1, WNT5A]
activation of immune response	12	[EZR, GATA3, HMGB1, LPXN, LSM14A, NR4A3, PELI1, PHPT1, RPS3, S100A14, TNFRSF21, UBE2N]
immune response-activating signal transduction	12	[EZR, GATA3, HMGB1, LPXN, LSM14A, NR4A3, PELI1, PHPT1, RPS3, S100A14, TNFRSF21, UBE2N]
cellular carbohydrate metabolic process	12	[FBP1, HAS2, HMGB1, PGAM2, PGP, PHKG2, PPP1CB, PPP1R2, PTGES3, SDHAF3, SORD, TPI1]
cellular respiration	12	[ALDH5A1, CISD1, COQ10B, COX1, COX3, COX4I1, NDUFA5, NR4A3, POLG2, PPARGC1A, SDHB, SUCLG2]
positive regulation of cell adhesion	12	[ARPC2, CD44, CITED2, GATA3, HAS2, HMGB1, NR4A3, RAC1, RPS3, S100A10, TGFB2, WNT5A]
response to inorganic substance	12	[CPNE2, FBP1, FKBP1A, JUN, KCNMB1, NR4A3, RACK1, RPS3, SLC30A7, SOD1, SUMO1, WNT5A]
RNA polymerase II transcription factor binding	12	[ANKRD2, ATF4, BHLHE41, CHD4, CITED2, CTNNB1, GATA3, HNRNPU, JUN, NCOR1, RUVBL1, TAF12]
male sex differentiation	12	[BCL2L11, CITED2, CTNNB1, FKBP4, GATA3, H3F3A, INHBA, KIT, NKX2-1, SRD5A1, WNT5A, YBX3]
positive regulation of apoptotic signaling pathway	12	[APOPT1, BCL2L11, GSDME, INHBA, MLLT11, RACK1, RPL11, RPL26, RPS3, RPS7, UBA52, UBB]
regulation of protein ubiquitination	12	[BAG5, DCUN1D1, DCUN1D5, FKBP1A, HSP90AA1, PELI1, RPL11, RPS3, RPS7, UBA52, UBB, UBE2N]
contractile fiber	12	[ACTG1, ANKRD2, ARF1, CAPZB, CTNNB1, FKBP1A, FXR1, HABP4, HSPB1, JPH1, MYL12A, TPM3]
myofibril	12	[ACTG1, ANKRD2, ARF1, CAPZB, CTNNB1, FKBP1A, FXR1, HABP4, HSPB1, JPH1, MYL12A, TPM3]
negative regulation of catabolic process	12	[BAG5, DEDD, EFNA1, FBP1, HNRNPU, PABPC1, PSMF1, RPL11, RPS7, SYNCRIP, UBE2J1, YBX1]
male sex differentiation	12	[BCL2L11, CITED2, CTNNB1, FKBP4, GATA3, H3F3A, INHBA, KIT, NKX2-1, SRD5A1, WNT5A, YBX3]
mesenchyme development	12	[CFL1, CITED2, CTNNB1, DDX5, EFNA1, HAND2, HAS2, MCRIP1, NKX2-1, OSR1, TGFB2, WNT5A]
mesenchymal cell differentiation	12	[CFL1, CITED2, CTNNB1, DDX5, EFNA1, HAND2, HAS2, MCRIP1, NKX2-1, OSR1, TGFB2, WNT5A]
RNA polymerase II transcription factor binding	12	[ANKRD2, ATF4, BHLHE41, CHD4, CITED2, CTNNB1, GATA3, HNRNPU, JUN, NCOR1, RUVBL1, TAF12]
positive regulation of cell adhesion	12	[ARPC2, CD44, CITED2, GATA3, HAS2, HMGB1, NR4A3, RAC1, RPS3, S100A10, TGFB2, WNT5A]
male sex differentiation	12	[BCL2L11, CITED2, CTNNB1, FKBP4, GATA3, H3F3A, INHBA, KIT, NKX2-1, SRD5A1, WNT5A, YBX3]
RNA polymerase II transcription factor binding	12	[ANKRD2, ATF4, BHLHE41, CHD4, CITED2, CTNNB1, GATA3, HNRNPU, JUN, NCOR1, RUVBL1, TAF12]
cellular respiration	12	[ALDH5A1, CISD1, COQ10B, COX1, COX3, COX4I1, NDUFA5, NR4A3, POLG2, PPARGC1A, SDHB, SUCLG2]
RNA polymerase II transcription factor binding	12	[ANKRD2, ATF4, BHLHE41, CHD4, CITED2, CTNNB1, GATA3, HNRNPU, JUN, NCOR1, RUVBL1, TAF12]
response to inorganic substance	12	[CPNE2, FBP1, FKBP1A, JUN, KCNMB1, NR4A3, RACK1, RPS3, SLC30A7, SOD1, SUMO1, WNT5A]
Rap1 signaling pathway	12	[ACTB, ACTG1, CALM1, CALM2, CALM3, CTNNB1, EFNA1, KIT, PFN1, RAC1, RAP1B, RHOA]
cAMP signaling pathway	12	[ATP2B1, CALM1, CALM2, CALM3, CAMK2D, CREB3L2, JUN, PAK1, PPP1CB, RAC1, RAP1B, RHOA]
Glucagon signaling pathway	12	[ATF4, CALM1, CALM2, CALM3, CAMK2D, CREB3L2, LDHB, PDHA2, PGAM2, PHKG2, PKM, PPARGC1A]
Alcoholism	12	[ATF4, CALM1, CALM2, CALM3, CREB3L2, H2AFJ, H3F3A, H3F3B, HIST1H2BD, LOC107131556, LOC404073, PPP1CB]
positive regulation of cell adhesion	12	[ARPC2, CD44, CITED2, GATA3, HAS2, HMGB1, NR4A3, RAC1, RPS3, S100A10, TGFB2, WNT5A]
fertilization	12	[DKKL1, H3F3A, HSPA1L, NPM2, PLCD4, PRSS37, SPA17, TNP2, TRIM36, UBE2Q1, WBP2NL, YBX3]
male sex differentiation	12	[BCL2L11, CITED2, CTNNB1, FKBP4, GATA3, H3F3A, INHBA, KIT, NKX2-1, SRD5A1, WNT5A, YBX3]
spermatid differentiation	12	[CAPZA3, H3F3A, KIT, PAFAH1B1, PRM2, ROPN1, SPEM1, TNP1, TNP2, TSSK6, UBE2B, UBE2J1]
spermatid development	12	[CAPZA3, H3F3A, KIT, PAFAH1B1, PRM2, ROPN1, SPEM1, TNP1, TNP2, TSSK6, UBE2B, UBE2J1]
ribosomal small subunit biogenesis	12	[RPL38, RPS15, RPS16, RPS17, RPS19, RPS28, RPS5, RPS6, RPS7, RPS8, RPSA, UTP18]
negative regulation of catabolic process	12	[BAG5, DEDD, EFNA1, FBP1, HNRNPU, PABPC1, PSMF1, RPL11, RPS7, SYNCRIP, UBE2J1, YBX1]
Rap1 signaling pathway	12	[ACTB, ACTG1, CALM1, CALM2, CALM3, CTNNB1, EFNA1, KIT, PFN1, RAC1, RAP1B, RHOA]
cAMP signaling pathway	12	[ATP2B1, CALM1, CALM2, CALM3, CAMK2D, CREB3L2, JUN, PAK1, PPP1CB, RAC1, RAP1B, RHOA]
Tight junction	12	[ACTB, ACTG1, ACTR3, CLDN2, EZR, JUN, MYL12A, RAC1, RDX, RHOA, TUBA1B, YBX3]
negative regulation of catabolic process	12	[BAG5, DEDD, EFNA1, FBP1, HNRNPU, PABPC1, PSMF1, RPL11, RPS7, SYNCRIP, UBE2J1, YBX1]
ubiquitin-like protein ligase activity	12	[ARIH1, CDC34, LTN1, PELI1, RNF11, UBE2B, UBE2F, UBE2J1, UBE2N, UBE2R2, UBE2V1, ZNRF1]
ubiquitin protein ligase activity	12	[ARIH1, CDC34, LTN1, PELI1, RNF11, UBE2B, UBE2F, UBE2J1, UBE2N, UBE2R2, UBE2V1, ZNRF1]
positive regulation of apoptotic signaling pathway	12	[APOPT1, BCL2L11, GSDME, INHBA, MLLT11, RACK1, RPL11, RPL26, RPS3, RPS7, UBA52, UBB]
positive regulation of proteolysis	12	[ADRM1, APOPT1, ARIH1, BCL2L11, EFNA1, HMGB1, PSME1, RACK1, RPS3, SUMO1, TNP1, TNP2]
regulation of protein ubiquitination	12	[BAG5, DCUN1D1, DCUN1D5, FKBP1A, HSP90AA1, PELI1, RPL11, RPS3, RPS7, UBA52, UBB, UBE2N]
response to inorganic substance	12	[CPNE2, FBP1, FKBP1A, JUN, KCNMB1, NR4A3, RACK1, RPS3, SLC30A7, SOD1, SUMO1, WNT5A]
positive regulation of apoptotic signaling pathway	12	[APOPT1, BCL2L11, GSDME, INHBA, MLLT11, RACK1, RPL11, RPL26, RPS3, RPS7, UBA52, UBB]
regulation of protein ubiquitination	12	[BAG5, DCUN1D1, DCUN1D5, FKBP1A, HSP90AA1, PELI1, RPL11, RPS3, RPS7, UBA52, UBB, UBE2N]
cell projection membrane	12	[ARPC1A, ARPC2, CD44, CFL1, CTNNB1, EZR, GAP43, GPI, HSP90AA1, PAK1, RAC1, RPS3]
cellular carbohydrate metabolic process	12	[FBP1, HAS2, HMGB1, PGAM2, PGP, PHKG2, PPP1CB, PPP1R2, PTGES3, SDHAF3, SORD, TPI1]
cellular respiration	12	[ALDH5A1, CISD1, COQ10B, COX1, COX3, COX4I1, NDUFA5, NR4A3, POLG2, PPARGC1A, SDHB, SUCLG2]
glucose metabolic process	12	[ALDH5A1, ATF4, FBP1, GAPDH, GAPDHS, GPI, HMGB1, PGAM2, PGP, SDHAF3, SERP1, TPI1]
positive regulation of cell adhesion	12	[ARPC2, CD44, CITED2, GATA3, HAS2, HMGB1, NR4A3, RAC1, RPS3, S100A10, TGFB2, WNT5A]
positive regulation of cytokine production	12	[AGPAT2, AKIRIN2, ATF4, GATA3, HMGB1, HSPB1, LSM14A, NR4A3, PELI1, RPS3, SOD1, WNT5A]
activation of immune response	12	[EZR, GATA3, HMGB1, LPXN, LSM14A, NR4A3, PELI1, PHPT1, RPS3, S100A14, TNFRSF21, UBE2N]
immune response-activating signal transduction	12	[EZR, GATA3, HMGB1, LPXN, LSM14A, NR4A3, PELI1, PHPT1, RPS3, S100A14, TNFRSF21, UBE2N]
MAPK signaling pathway	12	[ATF4, EFNA1, HSPA1A, HSPA1L, HSPB1, JUN, KIT, PAK1, RAC1, RAP1B, STMN1, TGFB2]
Tight junction	12	[ACTB, ACTG1, ACTR3, CLDN2, EZR, JUN, MYL12A, RAC1, RDX, RHOA, TUBA1B, YBX3]
cell projection membrane	12	[ARPC1A, ARPC2, CD44, CFL1, CTNNB1, EZR, GAP43, GPI, HSP90AA1, PAK1, RAC1, RPS3]
actin polymerization or depolymerization	12	[ACTR3, ARF1, ARPC1A, ARPC2, ARPC4, CAPZA2, CAPZA3, CAPZB, CFL1, MTPN, PFN1, RDX]
regulation of actin filament length	12	[ACTR3, ARF1, ARPC1A, ARPC2, ARPC4, CAPZA2, CAPZA3, CAPZB, CFL1, MTPN, PFN1, RDX]
regulation of actin polymerization or depolymerization	12	[ACTR3, ARF1, ARPC1A, ARPC2, ARPC4, CAPZA2, CAPZA3, CAPZB, CFL1, MTPN, PFN1, RDX]
MAPK signaling pathway	12	[ATF4, EFNA1, HSPA1A, HSPA1L, HSPB1, JUN, KIT, PAK1, RAC1, RAP1B, STMN1, TGFB2]
positive regulation of cell adhesion	12	[ARPC2, CD44, CITED2, GATA3, HAS2, HMGB1, NR4A3, RAC1, RPS3, S100A10, TGFB2, WNT5A]
positive regulation of cytokine production	12	[AGPAT2, AKIRIN2, ATF4, GATA3, HMGB1, HSPB1, LSM14A, NR4A3, PELI1, RPS3, SOD1, WNT5A]
male sex differentiation	12	[BCL2L11, CITED2, CTNNB1, FKBP4, GATA3, H3F3A, INHBA, KIT, NKX2-1, SRD5A1, WNT5A, YBX3]
activation of immune response	12	[EZR, GATA3, HMGB1, LPXN, LSM14A, NR4A3, PELI1, PHPT1, RPS3, S100A14, TNFRSF21, UBE2N]
immune response-activating signal transduction	12	[EZR, GATA3, HMGB1, LPXN, LSM14A, NR4A3, PELI1, PHPT1, RPS3, S100A14, TNFRSF21, UBE2N]
mesenchyme development	12	[CFL1, CITED2, CTNNB1, DDX5, EFNA1, HAND2, HAS2, MCRIP1, NKX2-1, OSR1, TGFB2, WNT5A]
mesenchymal cell differentiation	12	[CFL1, CITED2, CTNNB1, DDX5, EFNA1, HAND2, HAS2, MCRIP1, NKX2-1, OSR1, TGFB2, WNT5A]
sensory organ morphogenesis	12	[CITED2, CTNNB1, DLX5, GATA3, INSIG2, MEIS1, NR4A3, OSR1, PRRX1, RPL38, SOD1, WNT5A]
ear development	12	[BCL2L11, DLX5, GATA3, GSDME, INSIG2, NR4A3, OSR1, PAFAH1B1, PRRX1, RPL38, SOD1, WNT5A]
Herpes simplex infection	11	[CDC34, EEF1D, HMGN1, HNRNPK, JUN, PPP1CB, SKP1, SRSF3, SRSF9, TAF10, UBE2R2]
DNA conformation change	11	[H3F3A, HILS1, HIST1H2BD, HMGB1, HMGB3, PRM1, PRM2, RUVBL1, TNP1, TNP2, TSSK6]
response to steroid hormone	11	[DDX5, EIF4E, FKBP4, HMGB1, HNRNPU, LBH, NR4A3, PAK1, PAQR5, PTGES3, TGFB2]
muscle organ development	11	[ANKRD2, CHD2, CITED2, CTNNB1, FKBP1A, FOXP1, FXR1, JPH1, SERP1, WNT5A, YBX3]
muscle organ development	11	[ANKRD2, CHD2, CITED2, CTNNB1, FKBP1A, FOXP1, FXR1, JPH1, SERP1, WNT5A, YBX3]
multicellular organismal homeostasis	11	[ACTB, ACTG1, CDH3, CTNNB1, HAS2, HSPB1, MEX3C, NR4A3, PPARGC1A, SOD1, STMN1]
response to steroid hormone	11	[DDX5, EIF4E, FKBP4, HMGB1, HNRNPU, LBH, NR4A3, PAK1, PAQR5, PTGES3, TGFB2]
oxidoreduction coenzyme metabolic process	11	[ASPDH, COQ10B, ENO1, FBP1, GAPDH, GAPDHS, GPI, NCOR1, PGAM2, PKM, TPI1]
translation factor activity, RNA binding	11	[EEF1A1, EEF1D, EEF1G, EEF2, EIF1, EIF3E, EIF3I, EIF4E, EIF4G2, EIF5, EIF5A]
spindle organization	11	[CHMP5, EZR, HNRNPU, HSPA1A, NCOR1, PCNT, RAB11A, RHOA, RPS3, STMN1, TRIM36]
RNA catabolic process	11	[CNOT7, CSDE1, DDX5, EIF3E, EIF4A3, HNRNPU, PABPC1, POLR2D, RNASEH1, SYNCRIP, YBX1]
epithelium migration	11	[EFNA1, GATA3, HMGB1, HSPB1, JUN, KIT, PTP4A2, RAB11A, RHOA, TGFB2, WNT5A]
epithelial cell migration	11	[EFNA1, GATA3, HMGB1, HSPB1, JUN, KIT, PTP4A2, RAB11A, RHOA, TGFB2, WNT5A]
multicellular organismal homeostasis	11	[ACTB, ACTG1, CDH3, CTNNB1, HAS2, HSPB1, MEX3C, NR4A3, PPARGC1A, SOD1, STMN1]
RNA catabolic process	11	[CNOT7, CSDE1, DDX5, EIF3E, EIF4A3, HNRNPU, PABPC1, POLR2D, RNASEH1, SYNCRIP, YBX1]
translation factor activity, RNA binding	11	[EEF1A1, EEF1D, EEF1G, EEF2, EIF1, EIF3E, EIF3I, EIF4E, EIF4G2, EIF5, EIF5A]
oxidoreduction coenzyme metabolic process	11	[ASPDH, COQ10B, ENO1, FBP1, GAPDH, GAPDHS, GPI, NCOR1, PGAM2, PKM, TPI1]
chromatin remodeling	11	[ACTB, CHD4, CTNNB1, GATA3, H3F3A, HMGB1, MORF4L1, NPM2, RUVBL1, TNP1, TNP2]
negative regulation of organelle organization	11	[CAPZA2, CAPZA3, CAPZB, FKBP4, H3F3A, HNRNPU, MTPN, RAD21, RDX, STMN1, UBE2B]
leukocyte cell-cell adhesion	11	[CD44, CTNNB1, EZR, GATA3, HAS2, HMGB1, LGALS3, NR4A3, PELI1, RPS3, TNFRSF21]
chromatin remodeling	11	[ACTB, CHD4, CTNNB1, GATA3, H3F3A, HMGB1, MORF4L1, NPM2, RUVBL1, TNP1, TNP2]
DNA conformation change	11	[H3F3A, HILS1, HIST1H2BD, HMGB1, HMGB3, PRM1, PRM2, RUVBL1, TNP1, TNP2, TSSK6]
carbohydrate biosynthetic process	11	[ATF4, FBP1, GPI, HAS2, PGAM2, PGP, PHKG2, PTGES3, SDHAF3, SORD, TPI1]
negative regulation of organelle organization	11	[CAPZA2, CAPZA3, CAPZB, FKBP4, H3F3A, HNRNPU, MTPN, RAD21, RDX, STMN1, UBE2B]
eye development	11	[CITED2, CTNNB1, GATA3, HMGB1, INHBA, JUN, MEIS1, RPL24, SIX6, TGFB2, VIM]
muscle organ development	11	[ANKRD2, CHD2, CITED2, CTNNB1, FKBP1A, FOXP1, FXR1, JPH1, SERP1, WNT5A, YBX3]
contractile fiber part	11	[ANKRD2, ARF1, CAPZB, CTNNB1, FKBP1A, FXR1, HABP4, HSPB1, JPH1, MYL12A, TPM3]
chromatin remodeling	11	[ACTB, CHD4, CTNNB1, GATA3, H3F3A, HMGB1, MORF4L1, NPM2, RUVBL1, TNP1, TNP2]
epithelial tube morphogenesis	11	[CFL1, CITED2, CTNNB1, GATA3, HAND2, LMO4, NKX2-1, OSR1, PAK1, RHOA, WNT5A]
leukocyte cell-cell adhesion	11	[CD44, CTNNB1, EZR, GATA3, HAS2, HMGB1, LGALS3, NR4A3, PELI1, RPS3, TNFRSF21]
epithelial tube morphogenesis	11	[CFL1, CITED2, CTNNB1, GATA3, HAND2, LMO4, NKX2-1, OSR1, PAK1, RHOA, WNT5A]
development of primary sexual characteristics	11	[BCL2L11, CITED2, GATA3, H3F3A, INHBA, KIT, NKX2-1, OSR1, SOD1, WNT5A, YBX3]
gonad development	11	[BCL2L11, CITED2, GATA3, H3F3A, INHBA, KIT, NKX2-1, OSR1, SOD1, WNT5A, YBX3]
carbohydrate catabolic process	11	[ENO1, FBP1, GAPDH, GAPDHS, GPI, HMGB1, NCOR1, PGAM2, PKM, SORD, TPI1]
regulation of proteasomal protein catabolic process	11	[ARIH1, BAG5, MGC137055, PSME1, PSMF1, RACK1, RPL11, SUMO1, UBA52, UBB, UBE2J1]
epithelial tube morphogenesis	11	[CFL1, CITED2, CTNNB1, GATA3, HAND2, LMO4, NKX2-1, OSR1, PAK1, RHOA, WNT5A]
response to steroid hormone	11	[DDX5, EIF4E, FKBP4, HMGB1, HNRNPU, LBH, NR4A3, PAK1, PAQR5, PTGES3, TGFB2]
eye development	11	[CITED2, CTNNB1, GATA3, HMGB1, INHBA, JUN, MEIS1, RPL24, SIX6, TGFB2, VIM]
epithelium migration	11	[EFNA1, GATA3, HMGB1, HSPB1, JUN, KIT, PTP4A2, RAB11A, RHOA, TGFB2, WNT5A]
epithelial cell migration	11	[EFNA1, GATA3, HMGB1, HSPB1, JUN, KIT, PTP4A2, RAB11A, RHOA, TGFB2, WNT5A]
chromatin remodeling	11	[ACTB, CHD4, CTNNB1, GATA3, H3F3A, HMGB1, MORF4L1, NPM2, RUVBL1, TNP1, TNP2]
DNA conformation change	11	[H3F3A, HILS1, HIST1H2BD, HMGB1, HMGB3, PRM1, PRM2, RUVBL1, TNP1, TNP2, TSSK6]
cell cortex	11	[ACTB, CAPZA2, CAPZA3, CAPZB, CFL1, CTNNB1, EZR, LANCL2, PAFAH1B1, RDX, RHOA]
cell cortex	11	[ACTB, CAPZA2, CAPZA3, CAPZB, CFL1, CTNNB1, EZR, LANCL2, PAFAH1B1, RDX, RHOA]
positive regulation of cellular amide metabolic process	11	[EFNA1, EIF3E, EIF4A3, EIF5A, HABP4, NCOR1, NSUN4, POLR2D, RPL26, RPS9, SERP1]
RNA catabolic process	11	[CNOT7, CSDE1, DDX5, EIF3E, EIF4A3, HNRNPU, PABPC1, POLR2D, RNASEH1, SYNCRIP, YBX1]
eye development	11	[CITED2, CTNNB1, GATA3, HMGB1, INHBA, JUN, MEIS1, RPL24, SIX6, TGFB2, VIM]
neuron projection guidance	11	[DLX5, DPYSL2, EFNA1, FOXP1, GAP43, GATA3, KIF5C, NKX2-1, NR4A3, RPL24, WNT5A]
axon guidance	11	[DLX5, DPYSL2, EFNA1, FOXP1, GAP43, GATA3, KIF5C, NKX2-1, NR4A3, RPL24, WNT5A]
development of primary sexual characteristics	11	[BCL2L11, CITED2, GATA3, H3F3A, INHBA, KIT, NKX2-1, OSR1, SOD1, WNT5A, YBX3]
gonad development	11	[BCL2L11, CITED2, GATA3, H3F3A, INHBA, KIT, NKX2-1, OSR1, SOD1, WNT5A, YBX3]
leukocyte cell-cell adhesion	11	[CD44, CTNNB1, EZR, GATA3, HAS2, HMGB1, LGALS3, NR4A3, PELI1, RPS3, TNFRSF21]
carbohydrate biosynthetic process	11	[ATF4, FBP1, GPI, HAS2, PGAM2, PGP, PHKG2, PTGES3, SDHAF3, SORD, TPI1]
epithelium migration	11	[EFNA1, GATA3, HMGB1, HSPB1, JUN, KIT, PTP4A2, RAB11A, RHOA, TGFB2, WNT5A]
epithelial cell migration	11	[EFNA1, GATA3, HMGB1, HSPB1, JUN, KIT, PTP4A2, RAB11A, RHOA, TGFB2, WNT5A]
eye development	11	[CITED2, CTNNB1, GATA3, HMGB1, INHBA, JUN, MEIS1, RPL24, SIX6, TGFB2, VIM]
epithelial tube morphogenesis	11	[CFL1, CITED2, CTNNB1, GATA3, HAND2, LMO4, NKX2-1, OSR1, PAK1, RHOA, WNT5A]
contractile fiber part	11	[ANKRD2, ARF1, CAPZB, CTNNB1, FKBP1A, FXR1, HABP4, HSPB1, JPH1, MYL12A, TPM3]
regulation of proteasomal protein catabolic process	11	[ARIH1, BAG5, MGC137055, PSME1, PSMF1, RACK1, RPL11, SUMO1, UBA52, UBB, UBE2J1]
epithelial tube morphogenesis	11	[CFL1, CITED2, CTNNB1, GATA3, HAND2, LMO4, NKX2-1, OSR1, PAK1, RHOA, WNT5A]
cell cortex	11	[ACTB, CAPZA2, CAPZA3, CAPZB, CFL1, CTNNB1, EZR, LANCL2, PAFAH1B1, RDX, RHOA]
epithelial tube morphogenesis	11	[CFL1, CITED2, CTNNB1, GATA3, HAND2, LMO4, NKX2-1, OSR1, PAK1, RHOA, WNT5A]
epithelium migration	11	[EFNA1, GATA3, HMGB1, HSPB1, JUN, KIT, PTP4A2, RAB11A, RHOA, TGFB2, WNT5A]
epithelial cell migration	11	[EFNA1, GATA3, HMGB1, HSPB1, JUN, KIT, PTP4A2, RAB11A, RHOA, TGFB2, WNT5A]
cell cortex	11	[ACTB, CAPZA2, CAPZA3, CAPZB, CFL1, CTNNB1, EZR, LANCL2, PAFAH1B1, RDX, RHOA]
eye development	11	[CITED2, CTNNB1, GATA3, HMGB1, INHBA, JUN, MEIS1, RPL24, SIX6, TGFB2, VIM]
development of primary sexual characteristics	11	[BCL2L11, CITED2, GATA3, H3F3A, INHBA, KIT, NKX2-1, OSR1, SOD1, WNT5A, YBX3]
chromatin remodeling	11	[ACTB, CHD4, CTNNB1, GATA3, H3F3A, HMGB1, MORF4L1, NPM2, RUVBL1, TNP1, TNP2]
DNA conformation change	11	[H3F3A, HILS1, HIST1H2BD, HMGB1, HMGB3, PRM1, PRM2, RUVBL1, TNP1, TNP2, TSSK6]
gonad development	11	[BCL2L11, CITED2, GATA3, H3F3A, INHBA, KIT, NKX2-1, OSR1, SOD1, WNT5A, YBX3]
RNA catabolic process	11	[CNOT7, CSDE1, DDX5, EIF3E, EIF4A3, HNRNPU, PABPC1, POLR2D, RNASEH1, SYNCRIP, YBX1]
regulation of RNA splicing	11	[DDX5, EIF4A3, HABP4, HNRNPH1, HNRNPK, HNRNPL, HNRNPU, KHDRBS3, SRSF3, SRSF9, TRA2B]
multicellular organismal homeostasis	11	[ACTB, ACTG1, CDH3, CTNNB1, HAS2, HSPB1, MEX3C, NR4A3, PPARGC1A, SOD1, STMN1]
actin filament polymerization	11	[ACTR3, ARF1, ARPC1A, ARPC2, ARPC4, CAPZA2, CAPZA3, CAPZB, MTPN, PFN1, RDX]
regulation of actin filament polymerization	11	[ACTR3, ARF1, ARPC1A, ARPC2, ARPC4, CAPZA2, CAPZA3, CAPZB, MTPN, PFN1, RDX]
regulation of proteasomal protein catabolic process	11	[ARIH1, BAG5, MGC137055, PSME1, PSMF1, RACK1, RPL11, SUMO1, UBA52, UBB, UBE2J1]
multicellular organismal homeostasis	11	[ACTB, ACTG1, CDH3, CTNNB1, HAS2, HSPB1, MEX3C, NR4A3, PPARGC1A, SOD1, STMN1]
spindle organization	11	[CHMP5, EZR, HNRNPU, HSPA1A, NCOR1, PCNT, RAB11A, RHOA, RPS3, STMN1, TRIM36]
mitotic cell cycle phase transition	11	[CCNY, EIF4E, INHBA, NPM2, PSME1, RAB11A, RAD21, RDX, RPL24, RPL26, TAF10]
negative regulation of organelle organization	11	[CAPZA2, CAPZA3, CAPZB, FKBP4, H3F3A, HNRNPU, MTPN, RAD21, RDX, STMN1, UBE2B]
mitotic nuclear division	11	[CHMP5, HNRNPU, HSPA1A, KIF22, KIF2C, NPM2, RAB11A, RAD21, RHOA, RPL24, SLF1]
epithelium migration	11	[EFNA1, GATA3, HMGB1, HSPB1, JUN, KIT, PTP4A2, RAB11A, RHOA, TGFB2, WNT5A]
epithelial cell migration	11	[EFNA1, GATA3, HMGB1, HSPB1, JUN, KIT, PTP4A2, RAB11A, RHOA, TGFB2, WNT5A]
regulation of proteasomal protein catabolic process	11	[ARIH1, BAG5, MGC137055, PSME1, PSMF1, RACK1, RPL11, SUMO1, UBA52, UBB, UBE2J1]
epithelium migration	11	[EFNA1, GATA3, HMGB1, HSPB1, JUN, KIT, PTP4A2, RAB11A, RHOA, TGFB2, WNT5A]
epithelial cell migration	11	[EFNA1, GATA3, HMGB1, HSPB1, JUN, KIT, PTP4A2, RAB11A, RHOA, TGFB2, WNT5A]
epithelial tube morphogenesis	11	[CFL1, CITED2, CTNNB1, GATA3, HAND2, LMO4, NKX2-1, OSR1, PAK1, RHOA, WNT5A]
neuron projection guidance	11	[DLX5, DPYSL2, EFNA1, FOXP1, GAP43, GATA3, KIF5C, NKX2-1, NR4A3, RPL24, WNT5A]
axon guidance	11	[DLX5, DPYSL2, EFNA1, FOXP1, GAP43, GATA3, KIF5C, NKX2-1, NR4A3, RPL24, WNT5A]
carbohydrate biosynthetic process	11	[ATF4, FBP1, GPI, HAS2, PGAM2, PGP, PHKG2, PTGES3, SDHAF3, SORD, TPI1]
carbohydrate catabolic process	11	[ENO1, FBP1, GAPDH, GAPDHS, GPI, HMGB1, NCOR1, PGAM2, PKM, SORD, TPI1]
oxidoreduction coenzyme metabolic process	11	[ASPDH, COQ10B, ENO1, FBP1, GAPDH, GAPDHS, GPI, NCOR1, PGAM2, PKM, TPI1]
pyruvate metabolic process	11	[ENO1, FBP1, GAPDH, GAPDHS, GPI, NCOR1, NR4A3, PDHA2, PGAM2, PKM, TPI1]
epithelium migration	11	[EFNA1, GATA3, HMGB1, HSPB1, JUN, KIT, PTP4A2, RAB11A, RHOA, TGFB2, WNT5A]
leukocyte cell-cell adhesion	11	[CD44, CTNNB1, EZR, GATA3, HAS2, HMGB1, LGALS3, NR4A3, PELI1, RPS3, TNFRSF21]
epithelial cell migration	11	[EFNA1, GATA3, HMGB1, HSPB1, JUN, KIT, PTP4A2, RAB11A, RHOA, TGFB2, WNT5A]
macromolecular complex disassembly	11	[CAPZA2, CAPZA3, CAPZB, CFL1, EIF5A, KIF2C, MAP1LC3A, MTPN, RDX, STMN1, TNP1]
negative regulation of organelle organization	11	[CAPZA2, CAPZA3, CAPZB, FKBP4, H3F3A, HNRNPU, MTPN, RAD21, RDX, STMN1, UBE2B]
cell cortex	11	[ACTB, CAPZA2, CAPZA3, CAPZB, CFL1, CTNNB1, EZR, LANCL2, PAFAH1B1, RDX, RHOA]
actin filament polymerization	11	[ACTR3, ARF1, ARPC1A, ARPC2, ARPC4, CAPZA2, CAPZA3, CAPZB, MTPN, PFN1, RDX]
regulation of actin filament polymerization	11	[ACTR3, ARF1, ARPC1A, ARPC2, ARPC4, CAPZA2, CAPZA3, CAPZB, MTPN, PFN1, RDX]
epithelium migration	11	[EFNA1, GATA3, HMGB1, HSPB1, JUN, KIT, PTP4A2, RAB11A, RHOA, TGFB2, WNT5A]
leukocyte cell-cell adhesion	11	[CD44, CTNNB1, EZR, GATA3, HAS2, HMGB1, LGALS3, NR4A3, PELI1, RPS3, TNFRSF21]
development of primary sexual characteristics	11	[BCL2L11, CITED2, GATA3, H3F3A, INHBA, KIT, NKX2-1, OSR1, SOD1, WNT5A, YBX3]
chromatin remodeling	11	[ACTB, CHD4, CTNNB1, GATA3, H3F3A, HMGB1, MORF4L1, NPM2, RUVBL1, TNP1, TNP2]
muscle organ development	11	[ANKRD2, CHD2, CITED2, CTNNB1, FKBP1A, FOXP1, FXR1, JPH1, SERP1, WNT5A, YBX3]
epithelial cell migration	11	[EFNA1, GATA3, HMGB1, HSPB1, JUN, KIT, PTP4A2, RAB11A, RHOA, TGFB2, WNT5A]
epithelial tube morphogenesis	11	[CFL1, CITED2, CTNNB1, GATA3, HAND2, LMO4, NKX2-1, OSR1, PAK1, RHOA, WNT5A]
gonad development	11	[BCL2L11, CITED2, GATA3, H3F3A, INHBA, KIT, NKX2-1, OSR1, SOD1, WNT5A, YBX3]
eye development	11	[CITED2, CTNNB1, GATA3, HMGB1, INHBA, JUN, MEIS1, RPL24, SIX6, TGFB2, VIM]
neuron projection guidance	11	[DLX5, DPYSL2, EFNA1, FOXP1, GAP43, GATA3, KIF5C, NKX2-1, NR4A3, RPL24, WNT5A]
axon guidance	11	[DLX5, DPYSL2, EFNA1, FOXP1, GAP43, GATA3, KIF5C, NKX2-1, NR4A3, RPL24, WNT5A]
magnesium ion binding	10	[ARF1, CLYBL, ENO1, NT5C1B, PGP, PKM, RNASEH1, SRPK2, THTPA, TSSK6]
response to virus	10	[ARF1, BCL2L11, CFL1, CNOT7, EEF1G, GATA3, HSPB1, LSM14A, NPC2, STMN1]
Glycolysis / Gluconeogenesis	10	[ENO1, FBP1, GAPDH, GAPDHS, GPI, LDHB, PDHA2, PGAM2, PKM, TPI1]
nucleus organization	10	[CHMP5, H3F3A, PAFAH1B1, PRM2, SPAG4, SUMO1, TNP1, TNP2, TSSK6, WBP2NL]
homeostasis of number of cells	10	[BCL2L11, CITED2, GATA3, GPI, HMGB1, INHBA, KIT, POLB, RPS17, SOD1]
regulation of protein stability	10	[DPM3, EFNA1, GAPDH, GET4, HSP90AA1, LAMP1, RPL11, RPS7, SUMO1, UBE2B]
protein dephosphorylation	10	[ACP1, DUSP14, FKBP1A, PGP, PHPT1, PPP1CB, PPP1R2, PTP4A2, VRK3, YWHAE]
Glycolysis / Gluconeogenesis	10	[ENO1, FBP1, GAPDH, GAPDHS, GPI, LDHB, PDHA2, PGAM2, PKM, TPI1]
muscle cell differentiation	10	[ACTG1, ANKRD2, BHLHE41, CAPZB, CTNNB1, FOXP1, H3F3A, HNRNPU, KIT, YBX1]
heart morphogenesis	10	[CITED2, CTNNB1, EFNA1, FKBP1A, GATA3, HAND2, HAS2, JUN, TGFB2, WNT5A]
muscle cell differentiation	10	[ACTG1, ANKRD2, BHLHE41, CAPZB, CTNNB1, FOXP1, H3F3A, HNRNPU, KIT, YBX1]
pyridine-containing compound metabolic process	10	[ASPDH, ENO1, FBP1, GAPDH, GAPDHS, GPI, NCOR1, PGAM2, PKM, TPI1]
pyridine nucleotide metabolic process	10	[ASPDH, ENO1, FBP1, GAPDH, GAPDHS, GPI, NCOR1, PGAM2, PKM, TPI1]
nicotinamide nucleotide metabolic process	10	[ASPDH, ENO1, FBP1, GAPDH, GAPDHS, GPI, NCOR1, PGAM2, PKM, TPI1]
translational initiation	10	[EIF1, EIF3E, EIF3I, EIF4E, EIF4G2, EIF5, HABP4, PAIP2, POLR2D, RPL13A]
mRNA catabolic process	10	[CNOT7, CSDE1, DDX5, EIF3E, EIF4A3, HNRNPU, PABPC1, POLR2D, SYNCRIP, YBX1]
mRNA catabolic process	10	[CNOT7, CSDE1, DDX5, EIF3E, EIF4A3, HNRNPU, PABPC1, POLR2D, SYNCRIP, YBX1]
Estrogen signaling pathway	10	[ATF4, CALM1, CALM2, CALM3, CREB3L2, FKBP4, HSP90AA1, HSPA1A, HSPA1L, JUN]
transcription coactivator activity	10	[ARL2BP, CITED2, CTNNB1, GATA3, JUN, LPIN1, NACA, PPARGC1A, PRRX1, TAF10]
glycerolipid metabolic process	10	[AGPAT2, ALDH5A1, DPM3, GPAT3, INSIG2, LPIN1, PAFAH1B1, PGP, PLCD4, PYURF]
transcription coactivator activity	10	[ARL2BP, CITED2, CTNNB1, GATA3, JUN, LPIN1, NACA, PPARGC1A, PRRX1, TAF10]
mRNA catabolic process	10	[CNOT7, CSDE1, DDX5, EIF3E, EIF4A3, HNRNPU, PABPC1, POLR2D, SYNCRIP, YBX1]
translational initiation	10	[EIF1, EIF3E, EIF3I, EIF4E, EIF4G2, EIF5, HABP4, PAIP2, POLR2D, RPL13A]
regulation of epithelial cell proliferation	10	[CDH3, CTNNB1, DLX5, FOXP1, GATA3, JUN, NR4A3, OSR1, TGFB2, WNT5A]
pyridine-containing compound metabolic process	10	[ASPDH, ENO1, FBP1, GAPDH, GAPDHS, GPI, NCOR1, PGAM2, PKM, TPI1]
pyridine nucleotide metabolic process	10	[ASPDH, ENO1, FBP1, GAPDH, GAPDHS, GPI, NCOR1, PGAM2, PKM, TPI1]
nicotinamide nucleotide metabolic process	10	[ASPDH, ENO1, FBP1, GAPDH, GAPDHS, GPI, NCOR1, PGAM2, PKM, TPI1]
regulation of leukocyte cell-cell adhesion	10	[CD44, CTNNB1, GATA3, HAS2, HMGB1, LGALS3, NR4A3, PELI1, RPS3, TNFRSF21]
sulfur compound metabolic process	10	[AHCYL2, ALDH5A1, EEF1G, GSTO2, MAT2A, PDHA2, PHGDH, SOD1, SUCLG2, THTPA]
nucleosome	10	[H2AFJ, H3F3A, HILS1, HIST1H2BD, MPHOSPH8, PRM1, PRM2, SLF1, TNP1, TNP2]
nuclear chromosome segregation	10	[ACTR3, CHMP5, CTNNB1, HNRNPU, KIF22, KIF2C, RAB11A, RAD21, SLF1, UBE2B]
cell fate commitment	10	[CHD5, CTNNB1, ELF5, GAP43, GATA3, LMO4, NKX2-1, PRRX1, RTF1, WNT5A]
Focal adhesion	10	[ACTB, ACTG1, CTNNB1, JUN, MYL12A, PAK1, PPP1CB, RAC1, RAP1B, RHOA]
Neurotrophin signaling pathway	10	[ATF4, CALM1, CALM2, CALM3, CAMK2D, JUN, RAC1, RAP1B, RHOA, YWHAE]
heart morphogenesis	10	[CITED2, CTNNB1, EFNA1, FKBP1A, GATA3, HAND2, HAS2, JUN, TGFB2, WNT5A]
regulation of developmental growth	10	[BCL2L11, DPYSL2, EZR, FOXP1, RAB11A, RIMS2, SERP1, SOD1, WNT5A, YBX3]
positive regulation of binding	10	[CTNNB1, EIF3E, FKBP1A, GATA3, HAND2, HMGB1, RPL11, S100A10, STMN1, WNT5A]
heart morphogenesis	10	[CITED2, CTNNB1, EFNA1, FKBP1A, GATA3, HAND2, HAS2, JUN, TGFB2, WNT5A]
RNA localization	10	[EIF4A3, EIF5A, HNRNPU, KIF5C, LOC100299503, NOP10, POLR2D, RPSA, RUVBL1, SRSF3]
sarcomere	10	[ANKRD2, ARF1, CAPZB, CTNNB1, FKBP1A, HABP4, HSPB1, JPH1, MYL12A, TPM3]
Focal adhesion	10	[ACTB, ACTG1, CTNNB1, JUN, MYL12A, PAK1, PPP1CB, RAC1, RAP1B, RHOA]
Oxytocin signaling pathway	10	[ACTB, ACTG1, CALM1, CALM2, CALM3, CAMK2D, EEF2, JUN, PPP1CB, RHOA]
regulation of cell morphogenesis involved in differentiation	10	[ARPC2, CFL1, DPYSL2, EFNA1, PAFAH1B1, PAK1, RAB11A, RAC1, S100A10, WNT5A]
regulation of neuron apoptotic process	10	[ATF4, BCL2L11, CTNNB1, GATA3, JUN, NR4A3, PPARGC1A, RETREG1, SOD1, TGFB2]
regulation of developmental growth	10	[BCL2L11, DPYSL2, EZR, FOXP1, RAB11A, RIMS2, SERP1, SOD1, WNT5A, YBX3]
regulation of cell morphogenesis involved in differentiation	10	[ARPC2, CFL1, DPYSL2, EFNA1, PAFAH1B1, PAK1, RAB11A, RAC1, S100A10, WNT5A]
positive regulation of cell cycle process	10	[HNRNPU, NPM2, RAB11A, RAD21, RDX, RHOA, RPL26, SLF1, UBE2B, WNT5A]
stress-activated protein kinase signaling cascade	10	[EZR, GPS2, HAND2, HMGB1, NCOR1, PAFAH1B1, PAK1, RPS3, TGFB2, WNT5A]
regulation of stress-activated protein kinase signaling cascade	10	[EZR, GPS2, HAND2, HMGB1, NCOR1, PAFAH1B1, PAK1, RPS3, TGFB2, WNT5A]
stress-activated MAPK cascade	10	[EZR, GPS2, HAND2, HMGB1, NCOR1, PAFAH1B1, PAK1, RPS3, TGFB2, WNT5A]
regulation of stress-activated MAPK cascade	10	[EZR, GPS2, HAND2, HMGB1, NCOR1, PAFAH1B1, PAK1, RPS3, TGFB2, WNT5A]
Focal adhesion	10	[ACTB, ACTG1, CTNNB1, JUN, MYL12A, PAK1, PPP1CB, RAC1, RAP1B, RHOA]
regulation of neuron apoptotic process	10	[ATF4, BCL2L11, CTNNB1, GATA3, JUN, NR4A3, PPARGC1A, RETREG1, SOD1, TGFB2]
positive regulation of binding	10	[CTNNB1, EIF3E, FKBP1A, GATA3, HAND2, HMGB1, RPL11, S100A10, STMN1, WNT5A]
heart morphogenesis	10	[CITED2, CTNNB1, EFNA1, FKBP1A, GATA3, HAND2, HAS2, JUN, TGFB2, WNT5A]
positive regulation of cell cycle process	10	[HNRNPU, NPM2, RAB11A, RAD21, RDX, RHOA, RPL26, SLF1, UBE2B, WNT5A]
Focal adhesion	10	[ACTB, ACTG1, CTNNB1, JUN, MYL12A, PAK1, PPP1CB, RAC1, RAP1B, RHOA]
Neurotrophin signaling pathway	10	[ATF4, CALM1, CALM2, CALM3, CAMK2D, JUN, RAC1, RAP1B, RHOA, YWHAE]
Estrogen signaling pathway	10	[ATF4, CALM1, CALM2, CALM3, CREB3L2, FKBP4, HSP90AA1, HSPA1A, HSPA1L, JUN]
Oxytocin signaling pathway	10	[ACTB, ACTG1, CALM1, CALM2, CALM3, CAMK2D, EEF2, JUN, PPP1CB, RHOA]
Focal adhesion	10	[ACTB, ACTG1, CTNNB1, JUN, MYL12A, PAK1, PPP1CB, RAC1, RAP1B, RHOA]
transcription factor activity, RNA polymerase II transcription factor binding	10	[BHLHE41, CITED2, CNOT7, DNAJB1, FBP1, HDGF, HSPA1A, PPARGC1A, PRRX1, RTF1]
Focal adhesion	10	[ACTB, ACTG1, CTNNB1, JUN, MYL12A, PAK1, PPP1CB, RAC1, RAP1B, RHOA]
axon	10	[DPYSL2, FKBP4, FXR1, GAP43, HSPB1, KCNA4, MTPN, PAFAH1B1, RAB11A, TNFRSF21]
positive regulation of cell cycle process	10	[HNRNPU, NPM2, RAB11A, RAD21, RDX, RHOA, RPL26, SLF1, UBE2B, WNT5A]
regulation of cell morphogenesis involved in differentiation	10	[ARPC2, CFL1, DPYSL2, EFNA1, PAFAH1B1, PAK1, RAB11A, RAC1, S100A10, WNT5A]
negative regulation of cellular amide metabolic process	10	[CNOT7, DDX5, EIF4A3, EIF4E, FXR1, NCOR1, PAIP2, RPL13A, RPS3, SYNCRIP]
negative regulation of translation	10	[CNOT7, DDX5, EIF4A3, EIF4E, FXR1, NCOR1, PAIP2, RPL13A, RPS3, SYNCRIP]
Estrogen signaling pathway	10	[ATF4, CALM1, CALM2, CALM3, CREB3L2, FKBP4, HSP90AA1, HSPA1A, HSPA1L, JUN]
response to endoplasmic reticulum stress	10	[ATF4, BCL2L11, CREB3L2, GET4, JUN, SEC61B, SERP1, UBE2J1, UBXN4, UBXN6]
negative regulation of cellular amide metabolic process	10	[CNOT7, DDX5, EIF4A3, EIF4E, FXR1, NCOR1, PAIP2, RPL13A, RPS3, SYNCRIP]
translational initiation	10	[EIF1, EIF3E, EIF3I, EIF4E, EIF4G2, EIF5, HABP4, PAIP2, POLR2D, RPL13A]
mRNA catabolic process	10	[CNOT7, CSDE1, DDX5, EIF3E, EIF4A3, HNRNPU, PABPC1, POLR2D, SYNCRIP, YBX1]
negative regulation of translation	10	[CNOT7, DDX5, EIF4A3, EIF4E, FXR1, NCOR1, PAIP2, RPL13A, RPS3, SYNCRIP]
positive regulation of translation	10	[EIF3E, EIF4A3, EIF5A, HABP4, NCOR1, NSUN4, POLR2D, RPL26, RPS9, SERP1]
positive regulation of binding	10	[CTNNB1, EIF3E, FKBP1A, GATA3, HAND2, HMGB1, RPL11, S100A10, STMN1, WNT5A]
transcription coactivator activity	10	[ARL2BP, CITED2, CTNNB1, GATA3, JUN, LPIN1, NACA, PPARGC1A, PRRX1, TAF10]
heart morphogenesis	10	[CITED2, CTNNB1, EFNA1, FKBP1A, GATA3, HAND2, HAS2, JUN, TGFB2, WNT5A]
regulation of epithelial cell proliferation	10	[CDH3, CTNNB1, DLX5, FOXP1, GATA3, JUN, NR4A3, OSR1, TGFB2, WNT5A]
regulation of developmental growth	10	[BCL2L11, DPYSL2, EZR, FOXP1, RAB11A, RIMS2, SERP1, SOD1, WNT5A, YBX3]
Focal adhesion	10	[ACTB, ACTG1, CTNNB1, JUN, MYL12A, PAK1, PPP1CB, RAC1, RAP1B, RHOA]
regulation of neuron apoptotic process	10	[ATF4, BCL2L11, CTNNB1, GATA3, JUN, NR4A3, PPARGC1A, RETREG1, SOD1, TGFB2]
regulation of leukocyte cell-cell adhesion	10	[CD44, CTNNB1, GATA3, HAS2, HMGB1, LGALS3, NR4A3, PELI1, RPS3, TNFRSF21]
transcription coactivator activity	10	[ARL2BP, CITED2, CTNNB1, GATA3, JUN, LPIN1, NACA, PPARGC1A, PRRX1, TAF10]
heart morphogenesis	10	[CITED2, CTNNB1, EFNA1, FKBP1A, GATA3, HAND2, HAS2, JUN, TGFB2, WNT5A]
Estrogen signaling pathway	10	[ATF4, CALM1, CALM2, CALM3, CREB3L2, FKBP4, HSP90AA1, HSPA1A, HSPA1L, JUN]
negative regulation of cellular catabolic process	10	[BAG5, EFNA1, HNRNPU, PABPC1, PSMF1, RPL11, RPS7, SYNCRIP, UBE2J1, YBX1]
regulation of cell morphogenesis involved in differentiation	10	[ARPC2, CFL1, DPYSL2, EFNA1, PAFAH1B1, PAK1, RAB11A, RAC1, S100A10, WNT5A]
negative regulation of cellular catabolic process	10	[BAG5, EFNA1, HNRNPU, PABPC1, PSMF1, RPL11, RPS7, SYNCRIP, UBE2J1, YBX1]
cell fate commitment	10	[CHD5, CTNNB1, ELF5, GAP43, GATA3, LMO4, NKX2-1, PRRX1, RTF1, WNT5A]
heart morphogenesis	10	[CITED2, CTNNB1, EFNA1, FKBP1A, GATA3, HAND2, HAS2, JUN, TGFB2, WNT5A]
regulation of cell morphogenesis involved in differentiation	10	[ARPC2, CFL1, DPYSL2, EFNA1, PAFAH1B1, PAK1, RAB11A, RAC1, S100A10, WNT5A]
transcription factor activity, RNA polymerase II transcription factor binding	10	[BHLHE41, CITED2, CNOT7, DNAJB1, FBP1, HDGF, HSPA1A, PPARGC1A, PRRX1, RTF1]
transcription coactivator activity	10	[ARL2BP, CITED2, CTNNB1, GATA3, JUN, LPIN1, NACA, PPARGC1A, PRRX1, TAF10]
cell fate commitment	10	[CHD5, CTNNB1, ELF5, GAP43, GATA3, LMO4, NKX2-1, PRRX1, RTF1, WNT5A]
stress-activated protein kinase signaling cascade	10	[EZR, GPS2, HAND2, HMGB1, NCOR1, PAFAH1B1, PAK1, RPS3, TGFB2, WNT5A]
regulation of stress-activated protein kinase signaling cascade	10	[EZR, GPS2, HAND2, HMGB1, NCOR1, PAFAH1B1, PAK1, RPS3, TGFB2, WNT5A]
stress-activated MAPK cascade	10	[EZR, GPS2, HAND2, HMGB1, NCOR1, PAFAH1B1, PAK1, RPS3, TGFB2, WNT5A]
regulation of stress-activated MAPK cascade	10	[EZR, GPS2, HAND2, HMGB1, NCOR1, PAFAH1B1, PAK1, RPS3, TGFB2, WNT5A]
regulation of cell morphogenesis involved in differentiation	10	[ARPC2, CFL1, DPYSL2, EFNA1, PAFAH1B1, PAK1, RAB11A, RAC1, S100A10, WNT5A]
regulation of epithelial cell proliferation	10	[CDH3, CTNNB1, DLX5, FOXP1, GATA3, JUN, NR4A3, OSR1, TGFB2, WNT5A]
regulation of neuron apoptotic process	10	[ATF4, BCL2L11, CTNNB1, GATA3, JUN, NR4A3, PPARGC1A, RETREG1, SOD1, TGFB2]
heart morphogenesis	10	[CITED2, CTNNB1, EFNA1, FKBP1A, GATA3, HAND2, HAS2, JUN, TGFB2, WNT5A]
protein dephosphorylation	10	[ACP1, DUSP14, FKBP1A, PGP, PHPT1, PPP1CB, PPP1R2, PTP4A2, VRK3, YWHAE]
cGMP-PKG signaling pathway	10	[ATF4, ATP2B1, CALM1, CALM2, CALM3, CREB3L2, KCNMB1, PPP1CB, RHOA, SLC25A6]
Focal adhesion	10	[ACTB, ACTG1, CTNNB1, JUN, MYL12A, PAK1, PPP1CB, RAC1, RAP1B, RHOA]
Neurotrophin signaling pathway	10	[ATF4, CALM1, CALM2, CALM3, CAMK2D, JUN, RAC1, RAP1B, RHOA, YWHAE]
Estrogen signaling pathway	10	[ATF4, CALM1, CALM2, CALM3, CREB3L2, FKBP4, HSP90AA1, HSPA1A, HSPA1L, JUN]
Oxytocin signaling pathway	10	[ACTB, ACTG1, CALM1, CALM2, CALM3, CAMK2D, EEF2, JUN, PPP1CB, RHOA]
regulation of neuron apoptotic process	10	[ATF4, BCL2L11, CTNNB1, GATA3, JUN, NR4A3, PPARGC1A, RETREG1, SOD1, TGFB2]
regulation of cell morphogenesis involved in differentiation	10	[ARPC2, CFL1, DPYSL2, EFNA1, PAFAH1B1, PAK1, RAB11A, RAC1, S100A10, WNT5A]
stress-activated protein kinase signaling cascade	10	[EZR, GPS2, HAND2, HMGB1, NCOR1, PAFAH1B1, PAK1, RPS3, TGFB2, WNT5A]
regulation of stress-activated protein kinase signaling cascade	10	[EZR, GPS2, HAND2, HMGB1, NCOR1, PAFAH1B1, PAK1, RPS3, TGFB2, WNT5A]
stress-activated MAPK cascade	10	[EZR, GPS2, HAND2, HMGB1, NCOR1, PAFAH1B1, PAK1, RPS3, TGFB2, WNT5A]
regulation of stress-activated MAPK cascade	10	[EZR, GPS2, HAND2, HMGB1, NCOR1, PAFAH1B1, PAK1, RPS3, TGFB2, WNT5A]
stress-activated protein kinase signaling cascade	10	[EZR, GPS2, HAND2, HMGB1, NCOR1, PAFAH1B1, PAK1, RPS3, TGFB2, WNT5A]
regulation of stress-activated protein kinase signaling cascade	10	[EZR, GPS2, HAND2, HMGB1, NCOR1, PAFAH1B1, PAK1, RPS3, TGFB2, WNT5A]
stress-activated MAPK cascade	10	[EZR, GPS2, HAND2, HMGB1, NCOR1, PAFAH1B1, PAK1, RPS3, TGFB2, WNT5A]
regulation of stress-activated MAPK cascade	10	[EZR, GPS2, HAND2, HMGB1, NCOR1, PAFAH1B1, PAK1, RPS3, TGFB2, WNT5A]
nucleus organization	10	[CHMP5, H3F3A, PAFAH1B1, PRM2, SPAG4, SUMO1, TNP1, TNP2, TSSK6, WBP2NL]
single fertilization	10	[DKKL1, H3F3A, HSPA1L, NPM2, PLCD4, PRSS37, SPA17, TNP2, TRIM36, WBP2NL]
nucleosome	10	[H2AFJ, H3F3A, HILS1, HIST1H2BD, MPHOSPH8, PRM1, PRM2, SLF1, TNP1, TNP2]
negative regulation of cellular catabolic process	10	[BAG5, EFNA1, HNRNPU, PABPC1, PSMF1, RPL11, RPS7, SYNCRIP, UBE2J1, YBX1]
mRNA catabolic process	10	[CNOT7, CSDE1, DDX5, EIF3E, EIF4A3, HNRNPU, PABPC1, POLR2D, SYNCRIP, YBX1]
regulation of mRNA processing	10	[DDX5, EIF4A3, HNRNPK, HNRNPL, HNRNPU, KHDRBS3, SRPK2, SRSF3, SRSF9, TRA2B]
Focal adhesion	10	[ACTB, ACTG1, CTNNB1, JUN, MYL12A, PAK1, PPP1CB, RAC1, RAP1B, RHOA]
actomyosin structure organization	10	[ACTG1, FOXP1, LIMCH1, MYL12A, PAK1, PHACTR1, RAC1, RHOA, S100A10, STMN1]
regulation of cell morphogenesis involved in differentiation	10	[ARPC2, CFL1, DPYSL2, EFNA1, PAFAH1B1, PAK1, RAB11A, RAC1, S100A10, WNT5A]
Phagosome	10	[ACTB, ACTG1, ATP6V1C1, ATP6V1F, LAMP1, MBL1, RAC1, SEC61B, TUBA1B, TUBB4B]
Focal adhesion	10	[ACTB, ACTG1, CTNNB1, JUN, MYL12A, PAK1, PPP1CB, RAC1, RAP1B, RHOA]
Oxytocin signaling pathway	10	[ACTB, ACTG1, CALM1, CALM2, CALM3, CAMK2D, EEF2, JUN, PPP1CB, RHOA]
actomyosin structure organization	10	[ACTG1, FOXP1, LIMCH1, MYL12A, PAK1, PHACTR1, RAC1, RHOA, S100A10, STMN1]
Ubiquitin mediated proteolysis	10	[CDC34, SKP1, UBE2B, UBE2D2, UBE2F, UBE2J1, UBE2M, UBE2N, UBE2Q1, UBE2R2]
negative regulation of cellular catabolic process	10	[BAG5, EFNA1, HNRNPU, PABPC1, PSMF1, RPL11, RPS7, SYNCRIP, UBE2J1, YBX1]
regulation of epithelial cell proliferation	10	[CDH3, CTNNB1, DLX5, FOXP1, GATA3, JUN, NR4A3, OSR1, TGFB2, WNT5A]
regulation of neuron apoptotic process	10	[ATF4, BCL2L11, CTNNB1, GATA3, JUN, NR4A3, PPARGC1A, RETREG1, SOD1, TGFB2]
nuclear chromosome segregation	10	[ACTR3, CHMP5, CTNNB1, HNRNPU, KIF22, KIF2C, RAB11A, RAD21, SLF1, UBE2B]
positive regulation of cell cycle process	10	[HNRNPU, NPM2, RAB11A, RAD21, RDX, RHOA, RPL26, SLF1, UBE2B, WNT5A]
regulation of epithelial cell proliferation	10	[CDH3, CTNNB1, DLX5, FOXP1, GATA3, JUN, NR4A3, OSR1, TGFB2, WNT5A]
regulation of cell morphogenesis involved in differentiation	10	[ARPC2, CFL1, DPYSL2, EFNA1, PAFAH1B1, PAK1, RAB11A, RAC1, S100A10, WNT5A]
Glycolysis / Gluconeogenesis	10	[ENO1, FBP1, GAPDH, GAPDHS, GPI, LDHB, PDHA2, PGAM2, PKM, TPI1]
sulfur compound metabolic process	10	[AHCYL2, ALDH5A1, EEF1G, GSTO2, MAT2A, PDHA2, PHGDH, SOD1, SUCLG2, THTPA]
pyridine-containing compound metabolic process	10	[ASPDH, ENO1, FBP1, GAPDH, GAPDHS, GPI, NCOR1, PGAM2, PKM, TPI1]
nucleoside diphosphate metabolic process	10	[AK1, ENO1, FBP1, GAPDH, GAPDHS, GPI, NCOR1, PGAM2, PKM, TPI1]
pyridine nucleotide metabolic process	10	[ASPDH, ENO1, FBP1, GAPDH, GAPDHS, GPI, NCOR1, PGAM2, PKM, TPI1]
nucleotide phosphorylation	10	[AK1, ENO1, FBP1, GAPDH, GAPDHS, GPI, NCOR1, PGAM2, PKM, TPI1]
nucleoside diphosphate phosphorylation	10	[AK1, ENO1, FBP1, GAPDH, GAPDHS, GPI, NCOR1, PGAM2, PKM, TPI1]
nicotinamide nucleotide metabolic process	10	[ASPDH, ENO1, FBP1, GAPDH, GAPDHS, GPI, NCOR1, PGAM2, PKM, TPI1]
regulation of leukocyte cell-cell adhesion	10	[CD44, CTNNB1, GATA3, HAS2, HMGB1, LGALS3, NR4A3, PELI1, RPS3, TNFRSF21]
heart morphogenesis	10	[CITED2, CTNNB1, EFNA1, FKBP1A, GATA3, HAND2, HAS2, JUN, TGFB2, WNT5A]
Focal adhesion	10	[ACTB, ACTG1, CTNNB1, JUN, MYL12A, PAK1, PPP1CB, RAC1, RAP1B, RHOA]
actomyosin structure organization	10	[ACTG1, FOXP1, LIMCH1, MYL12A, PAK1, PHACTR1, RAC1, RHOA, S100A10, STMN1]
protein complex disassembly	10	[CAPZA2, CAPZA3, CAPZB, CFL1, EIF5A, KIF2C, MAP1LC3A, MTPN, RDX, STMN1]
regulation of cell morphogenesis involved in differentiation	10	[ARPC2, CFL1, DPYSL2, EFNA1, PAFAH1B1, PAK1, RAB11A, RAC1, S100A10, WNT5A]
Focal adhesion	10	[ACTB, ACTG1, CTNNB1, JUN, MYL12A, PAK1, PPP1CB, RAC1, RAP1B, RHOA]
cell fate commitment	10	[CHD5, CTNNB1, ELF5, GAP43, GATA3, LMO4, NKX2-1, PRRX1, RTF1, WNT5A]
homeostasis of number of cells	10	[BCL2L11, CITED2, GATA3, GPI, HMGB1, INHBA, KIT, POLB, RPS17, SOD1]
regulation of epithelial cell proliferation	10	[CDH3, CTNNB1, DLX5, FOXP1, GATA3, JUN, NR4A3, OSR1, TGFB2, WNT5A]
positive regulation of binding	10	[CTNNB1, EIF3E, FKBP1A, GATA3, HAND2, HMGB1, RPL11, S100A10, STMN1, WNT5A]
regulation of leukocyte cell-cell adhesion	10	[CD44, CTNNB1, GATA3, HAS2, HMGB1, LGALS3, NR4A3, PELI1, RPS3, TNFRSF21]
transcription coactivator activity	10	[ARL2BP, CITED2, CTNNB1, GATA3, JUN, LPIN1, NACA, PPARGC1A, PRRX1, TAF10]
stress-activated protein kinase signaling cascade	10	[EZR, GPS2, HAND2, HMGB1, NCOR1, PAFAH1B1, PAK1, RPS3, TGFB2, WNT5A]
heart morphogenesis	10	[CITED2, CTNNB1, EFNA1, FKBP1A, GATA3, HAND2, HAS2, JUN, TGFB2, WNT5A]
regulation of stress-activated protein kinase signaling cascade	10	[EZR, GPS2, HAND2, HMGB1, NCOR1, PAFAH1B1, PAK1, RPS3, TGFB2, WNT5A]
regulation of cell morphogenesis involved in differentiation	10	[ARPC2, CFL1, DPYSL2, EFNA1, PAFAH1B1, PAK1, RAB11A, RAC1, S100A10, WNT5A]
regulation of neuron apoptotic process	10	[ATF4, BCL2L11, CTNNB1, GATA3, JUN, NR4A3, PPARGC1A, RETREG1, SOD1, TGFB2]
stress-activated MAPK cascade	10	[EZR, GPS2, HAND2, HMGB1, NCOR1, PAFAH1B1, PAK1, RPS3, TGFB2, WNT5A]
regulation of stress-activated MAPK cascade	10	[EZR, GPS2, HAND2, HMGB1, NCOR1, PAFAH1B1, PAK1, RPS3, TGFB2, WNT5A]
actin filament binding	9	[ACTR3, ARPC1A, ARPC2, ARPC4, CAPZB, CFL1, EZR, MYL12A, TPM3]
positive regulation of DNA metabolic process	9	[CTNNB1, HMGB1, HSP90AA1, PPARGC1A, PTGES3, RPS3, SLF1, UBE2B, UBE2N]
inner ear development	9	[DLX5, GATA3, GSDME, INSIG2, NR4A3, PAFAH1B1, PRRX1, SOD1, WNT5A]
ear morphogenesis	9	[DLX5, GATA3, INSIG2, NR4A3, OSR1, PRRX1, RPL38, SOD1, WNT5A]
epidermis development	9	[CDH3, CTNNB1, INHBA, IRF6, LELP1, PAFAH1B1, SOD1, TGFB2, WNT5A]
skin development	9	[CDH3, CTNNB1, INHBA, IRF6, LELP1, PTGES3, STMN1, TGFB2, WNT5A]
skeletal system morphogenesis	9	[CITED2, COL13A1, CTNNB1, DLX5, EIF4A3, HAS2, INSIG2, OSR1, PRRX1]
fat cell differentiation	9	[ADIG, ARL4A, DKKL1, GATA3, GPS2, MEX3C, NR4A3, PPARGC1A, WNT5A]
stem cell differentiation	9	[CFL1, CHD2, CITED2, HAND2, HNRNPU, KIT, LBH, OSR1, TGFB2]
Hippo signaling pathway	9	[ACTB, ACTG1, CTNNB1, PPP1CB, TGFB2, WNT5A, YWHAE, YWHAQ, YWHAZ]
cytoskeleton-dependent intracellular transport	9	[BICD2, DYNLL1, DYNLL2, HSPB1, KIF5C, LAMP1, PAFAH1B1, UBA52, UBB]
epidermis development	9	[CDH3, CTNNB1, INHBA, IRF6, LELP1, PAFAH1B1, SOD1, TGFB2, WNT5A]
viral process	9	[BCL2L11, CFL1, CHMP5, CNOT7, DYNLL1, JUN, PCBP1, PPIA, SRPK2]
actin filament bundle assembly	9	[EZR, PAK1, PFN1, PHACTR1, RAC1, RDX, RHOA, S100A10, STMN1]
actin filament bundle organization	9	[EZR, PAK1, PFN1, PHACTR1, RAC1, RDX, RHOA, S100A10, STMN1]
respiratory chain	9	[COX1, COX3, COX4I1, COX7A2, COX7A2L, COX7B, NDUFA5, NDUFB2, SDHB]
mitochondrial membrane part	9	[COX1, COX4I1, COX7A2, COX7A2L, COX7B, FUNDC2, NDUFA5, NDUFB2, SDHB]
gastrulation	9	[CTNNB1, ELF5, GPI, INHBA, NR4A3, OSR1, RACK1, RTF1, WNT5A]
stem cell differentiation	9	[CFL1, CHD2, CITED2, HAND2, HNRNPU, KIT, LBH, OSR1, TGFB2]
fat cell differentiation	9	[ADIG, ARL4A, DKKL1, GATA3, GPS2, MEX3C, NR4A3, PPARGC1A, WNT5A]
negative regulation of nervous system development	9	[BAG5, CTNNB1, EFNA1, EIF4E, FKBP4, MEIS1, TNFRSF21, VIM, WNT5A]
Leukocyte transendothelial migration	9	[ACTB, ACTG1, CLDN2, CTNNB1, EZR, MYL12A, RAC1, RAP1B, RHOA]
actin filament binding	9	[ACTR3, ARPC1A, ARPC2, ARPC4, CAPZB, CFL1, EZR, MYL12A, TPM3]
actin filament binding	9	[ACTR3, ARPC1A, ARPC2, ARPC4, CAPZB, CFL1, EZR, MYL12A, TPM3]
Leukocyte transendothelial migration	9	[ACTB, ACTG1, CLDN2, CTNNB1, EZR, MYL12A, RAC1, RAP1B, RHOA]
epidermis development	9	[CDH3, CTNNB1, INHBA, IRF6, LELP1, PAFAH1B1, SOD1, TGFB2, WNT5A]
respiratory chain	9	[COX1, COX3, COX4I1, COX7A2, COX7A2L, COX7B, NDUFA5, NDUFB2, SDHB]
mitochondrial membrane part	9	[COX1, COX4I1, COX7A2, COX7A2L, COX7B, FUNDC2, NDUFA5, NDUFB2, SDHB]
positive regulation of protein polymerization	9	[ACTR3, ARF1, ARPC1A, ARPC2, ARPC4, HSPA1A, PAK1, RAC1, RPS3]
actin filament bundle assembly	9	[EZR, PAK1, PFN1, PHACTR1, RAC1, RDX, RHOA, S100A10, STMN1]
actin filament bundle organization	9	[EZR, PAK1, PFN1, PHACTR1, RAC1, RDX, RHOA, S100A10, STMN1]
intracellular receptor signaling pathway	9	[CITED2, DDX5, FKBP4, LBH, LSM14A, NR4A3, PAK1, PTGES3, STARD10]
cellular response to steroid hormone stimulus	9	[DDX5, EIF4E, FKBP4, HNRNPU, LBH, NR4A3, PAK1, PAQR5, PTGES3]
Leukocyte transendothelial migration	9	[ACTB, ACTG1, CLDN2, CTNNB1, EZR, MYL12A, RAC1, RAP1B, RHOA]
Bacterial invasion of epithelial cells	9	[ACTB, ACTG1, ARPC1A, ARPC2, ARPC4, CLTA, CTNNB1, RAC1, RHOA]
DNA-templated transcription, initiation	9	[CTNNB1, GTF2F1, GTF2F2, HMGB1, JUN, POLR2D, TAF10, TAF12, TFAM]
regulation of epithelial cell migration	9	[EFNA1, GATA3, HMGB1, HSPB1, JUN, RAB11A, RHOA, TGFB2, WNT5A]
epidermis development	9	[CDH3, CTNNB1, INHBA, IRF6, LELP1, PAFAH1B1, SOD1, TGFB2, WNT5A]
gliogenesis	9	[CTNNB1, GAP43, NKX2-1, PAFAH1B1, PHGDH, SOD1, TGFB2, TNFRSF21, VIM]
Hippo signaling pathway	9	[ACTB, ACTG1, CTNNB1, PPP1CB, TGFB2, WNT5A, YWHAE, YWHAQ, YWHAZ]
Leukocyte transendothelial migration	9	[ACTB, ACTG1, CLDN2, CTNNB1, EZR, MYL12A, RAC1, RAP1B, RHOA]
Bacterial invasion of epithelial cells	9	[ACTB, ACTG1, ARPC1A, ARPC2, ARPC4, CLTA, CTNNB1, RAC1, RHOA]
actin filament bundle assembly	9	[EZR, PAK1, PFN1, PHACTR1, RAC1, RDX, RHOA, S100A10, STMN1]
actin filament bundle organization	9	[EZR, PAK1, PFN1, PHACTR1, RAC1, RDX, RHOA, S100A10, STMN1]
sperm flagellum	9	[AK1, CABYR, GABARAP, ODF1, ROPN1, SPA17, SPATA6, TCP11, TEKT1]
9+2 motile cilium	9	[AK1, CABYR, GABARAP, ODF1, ROPN1, SPA17, SPATA6, TCP11, TEKT1]
DNA-templated transcription, initiation	9	[CTNNB1, GTF2F1, GTF2F2, HMGB1, JUN, POLR2D, TAF10, TAF12, TFAM]
gene silencing	9	[CNOT7, DDX5, FXR1, H2AFJ, MORF4L1, NCOR1, PABPC1, TNP1, UBE2B]
regulation of gene expression, epigenetic	9	[CTNNB1, DDX5, FXR1, H2AFJ, HNRNPU, MORF4L1, NCOR1, TNP1, UBE2B]
gliogenesis	9	[CTNNB1, GAP43, NKX2-1, PAFAH1B1, PHGDH, SOD1, TGFB2, TNFRSF21, VIM]
Adrenergic signaling in cardiomyocytes	9	[ATF4, ATP2B1, CALM1, CALM2, CALM3, CAMK2D, CREB3L2, PPP1CB, TPM3]
epidermis development	9	[CDH3, CTNNB1, INHBA, IRF6, LELP1, PAFAH1B1, SOD1, TGFB2, WNT5A]
skin development	9	[CDH3, CTNNB1, INHBA, IRF6, LELP1, PTGES3, STMN1, TGFB2, WNT5A]
inner ear development	9	[DLX5, GATA3, GSDME, INSIG2, NR4A3, PAFAH1B1, PRRX1, SOD1, WNT5A]
DNA-templated transcription, initiation	9	[CTNNB1, GTF2F1, GTF2F2, HMGB1, JUN, POLR2D, TAF10, TAF12, TFAM]
telencephalon development	9	[CTNNB1, DLX5, INHBA, NKX2-1, NR4A3, PAFAH1B1, TRA2B, WNT5A, YWHAE]
gastrulation	9	[CTNNB1, ELF5, GPI, INHBA, NR4A3, OSR1, RACK1, RTF1, WNT5A]
ear morphogenesis	9	[DLX5, GATA3, INSIG2, NR4A3, OSR1, PRRX1, RPL38, SOD1, WNT5A]
DNA-templated transcription, initiation	9	[CTNNB1, GTF2F1, GTF2F2, HMGB1, JUN, POLR2D, TAF10, TAF12, TFAM]
regulation of epithelial cell migration	9	[EFNA1, GATA3, HMGB1, HSPB1, JUN, RAB11A, RHOA, TGFB2, WNT5A]
regulation of epithelial cell migration	9	[EFNA1, GATA3, HMGB1, HSPB1, JUN, RAB11A, RHOA, TGFB2, WNT5A]
gastrulation	9	[CTNNB1, ELF5, GPI, INHBA, NR4A3, OSR1, RACK1, RTF1, WNT5A]
regulation of epithelial cell migration	9	[EFNA1, GATA3, HMGB1, HSPB1, JUN, RAB11A, RHOA, TGFB2, WNT5A]
cytoskeleton-dependent intracellular transport	9	[BICD2, DYNLL1, DYNLL2, HSPB1, KIF5C, LAMP1, PAFAH1B1, UBA52, UBB]
fat cell differentiation	9	[ADIG, ARL4A, DKKL1, GATA3, GPS2, MEX3C, NR4A3, PPARGC1A, WNT5A]
organic hydroxy compound biosynthetic process	9	[CDH3, DKKL1, GATA3, HAND2, INSIG2, PGP, QDPR, SOD1, WNT5A]
inner ear development	9	[DLX5, GATA3, GSDME, INSIG2, NR4A3, PAFAH1B1, PRRX1, SOD1, WNT5A]
ear morphogenesis	9	[DLX5, GATA3, INSIG2, NR4A3, OSR1, PRRX1, RPL38, SOD1, WNT5A]
Leukocyte transendothelial migration	9	[ACTB, ACTG1, CLDN2, CTNNB1, EZR, MYL12A, RAC1, RAP1B, RHOA]
transcriptional activator activity, RNA polymerase II proximal promoter sequence-specific DNA binding	9	[ATF4, CREB3L2, DLX5, GATA3, HAND2, HNRNPK, MEIS1, NR4A3, YBX1]
DNA-templated transcription, initiation	9	[CTNNB1, GTF2F1, GTF2F2, HMGB1, JUN, POLR2D, TAF10, TAF12, TFAM]
positive regulation of DNA metabolic process	9	[CTNNB1, HMGB1, HSP90AA1, PPARGC1A, PTGES3, RPS3, SLF1, UBE2B, UBE2N]
Cardiac muscle contraction	9	[COX1, COX3, COX4I1, COX7A2, COX7A2L, COX7B, LOC101902937, MGC148714, TPM3]
respiratory chain	9	[COX1, COX3, COX4I1, COX7A2, COX7A2L, COX7B, NDUFA5, NDUFB2, SDHB]
electron transfer activity	9	[COX1, COX3, COX4I1, COX7A2, COX7A2L, COX7B, FDX1, SDHB, SH3BGRL3]
mitochondrial membrane part	9	[COX1, COX4I1, COX7A2, COX7A2L, COX7B, FUNDC2, NDUFA5, NDUFB2, SDHB]
skeletal system morphogenesis	9	[CITED2, COL13A1, CTNNB1, DLX5, EIF4A3, HAS2, INSIG2, OSR1, PRRX1]
negative regulation of nervous system development	9	[BAG5, CTNNB1, EFNA1, EIF4E, FKBP4, MEIS1, TNFRSF21, VIM, WNT5A]
Oocyte meiosis	9	[CALM1, CALM2, CALM3, CAMK2D, PPP1CB, SKP1, YWHAE, YWHAQ, YWHAZ]
Adrenergic signaling in cardiomyocytes	9	[ATF4, ATP2B1, CALM1, CALM2, CALM3, CAMK2D, CREB3L2, PPP1CB, TPM3]
Hippo signaling pathway	9	[ACTB, ACTG1, CTNNB1, PPP1CB, TGFB2, WNT5A, YWHAE, YWHAQ, YWHAZ]
Insulin signaling pathway	9	[CALM1, CALM2, CALM3, EIF4E, FBP1, PHKG2, PPARGC1A, PPP1CB, RPS6]
epidermis development	9	[CDH3, CTNNB1, INHBA, IRF6, LELP1, PAFAH1B1, SOD1, TGFB2, WNT5A]
gliogenesis	9	[CTNNB1, GAP43, NKX2-1, PAFAH1B1, PHGDH, SOD1, TGFB2, TNFRSF21, VIM]
epidermis development	9	[CDH3, CTNNB1, INHBA, IRF6, LELP1, PAFAH1B1, SOD1, TGFB2, WNT5A]
gliogenesis	9	[CTNNB1, GAP43, NKX2-1, PAFAH1B1, PHGDH, SOD1, TGFB2, TNFRSF21, VIM]
telencephalon development	9	[CTNNB1, DLX5, INHBA, NKX2-1, NR4A3, PAFAH1B1, TRA2B, WNT5A, YWHAE]
development of primary male sexual characteristics	9	[BCL2L11, CITED2, GATA3, H3F3A, INHBA, KIT, NKX2-1, WNT5A, YBX3]
DNA packaging	9	[H3F3A, HILS1, HIST1H2BD, HMGB1, PRM1, PRM2, TNP1, TNP2, TSSK6]
male gonad development	9	[BCL2L11, CITED2, GATA3, H3F3A, INHBA, KIT, NKX2-1, WNT5A, YBX3]
catalytic step 2 spliceosome	9	[DDX5, EIF4A3, HNRNPH1, HNRNPK, HNRNPU, LSM2, SF3B6, SLU7, SYNCRIP]
regulation of mRNA splicing, via spliceosome	9	[DDX5, EIF4A3, HNRNPK, HNRNPL, HNRNPU, KHDRBS3, SRSF3, SRSF9, TRA2B]
Leukocyte transendothelial migration	9	[ACTB, ACTG1, CLDN2, CTNNB1, EZR, MYL12A, RAC1, RAP1B, RHOA]
actin filament bundle assembly	9	[EZR, PAK1, PFN1, PHACTR1, RAC1, RDX, RHOA, S100A10, STMN1]
actin filament bundle organization	9	[EZR, PAK1, PFN1, PHACTR1, RAC1, RDX, RHOA, S100A10, STMN1]
Hippo signaling pathway	9	[ACTB, ACTG1, CTNNB1, PPP1CB, TGFB2, WNT5A, YWHAE, YWHAQ, YWHAZ]
Leukocyte transendothelial migration	9	[ACTB, ACTG1, CLDN2, CTNNB1, EZR, MYL12A, RAC1, RAP1B, RHOA]
Bacterial invasion of epithelial cells	9	[ACTB, ACTG1, ARPC1A, ARPC2, ARPC4, CLTA, CTNNB1, RAC1, RHOA]
positive regulation of protein polymerization	9	[ACTR3, ARF1, ARPC1A, ARPC2, ARPC4, HSPA1A, PAK1, RAC1, RPS3]
gastrulation	9	[CTNNB1, ELF5, GPI, INHBA, NR4A3, OSR1, RACK1, RTF1, WNT5A]
signal transduction by p53 class mediator	9	[ANKRD2, CD44, DDX5, HNRNPK, RPL11, RPL26, RPS7, UBA52, UBB]
positive regulation of DNA metabolic process	9	[CTNNB1, HMGB1, HSP90AA1, PPARGC1A, PTGES3, RPS3, SLF1, UBE2B, UBE2N]
intrinsic apoptotic signaling pathway by p53 class mediator	9	[ANKRD2, CD44, DDX5, HNRNPK, RPL11, RPL26, RPS7, UBA52, UBB]
regulation of signal transduction by p53 class mediator	9	[ANKRD2, CD44, DDX5, HNRNPK, RPL11, RPL26, RPS7, UBA52, UBB]
regulation of epithelial cell migration	9	[EFNA1, GATA3, HMGB1, HSPB1, JUN, RAB11A, RHOA, TGFB2, WNT5A]
negative regulation of nervous system development	9	[BAG5, CTNNB1, EFNA1, EIF4E, FKBP4, MEIS1, TNFRSF21, VIM, WNT5A]
inner ear development	9	[DLX5, GATA3, GSDME, INSIG2, NR4A3, PAFAH1B1, PRRX1, SOD1, WNT5A]
telencephalon development	9	[CTNNB1, DLX5, INHBA, NKX2-1, NR4A3, PAFAH1B1, TRA2B, WNT5A, YWHAE]
electron transfer activity	9	[COX1, COX3, COX4I1, COX7A2, COX7A2L, COX7B, FDX1, SDHB, SH3BGRL3]
purine nucleoside diphosphate metabolic process	9	[ENO1, FBP1, GAPDH, GAPDHS, GPI, NCOR1, PGAM2, PKM, TPI1]
ribonucleoside diphosphate metabolic process	9	[ENO1, FBP1, GAPDH, GAPDHS, GPI, NCOR1, PGAM2, PKM, TPI1]
ATP generation from ADP	9	[ENO1, FBP1, GAPDH, GAPDHS, GPI, NCOR1, PGAM2, PKM, TPI1]
purine ribonucleoside diphosphate metabolic process	9	[ENO1, FBP1, GAPDH, GAPDHS, GPI, NCOR1, PGAM2, PKM, TPI1]
glycolytic process	9	[ENO1, FBP1, GAPDH, GAPDHS, GPI, NCOR1, PGAM2, PKM, TPI1]
ADP metabolic process	9	[ENO1, FBP1, GAPDH, GAPDHS, GPI, NCOR1, PGAM2, PKM, TPI1]
immune response-regulating cell surface receptor signaling pathway	9	[EZR, GATA3, KIT, LPXN, NR4A3, PHPT1, RPS3, TNFRSF21, UBE2N]
regulation of epithelial cell migration	9	[EFNA1, GATA3, HMGB1, HSPB1, JUN, RAB11A, RHOA, TGFB2, WNT5A]
Leukocyte transendothelial migration	9	[ACTB, ACTG1, CLDN2, CTNNB1, EZR, MYL12A, RAC1, RAP1B, RHOA]
Bacterial invasion of epithelial cells	9	[ACTB, ACTG1, ARPC1A, ARPC2, ARPC4, CLTA, CTNNB1, RAC1, RHOA]
actin filament binding	9	[ACTR3, ARPC1A, ARPC2, ARPC4, CAPZB, CFL1, EZR, MYL12A, TPM3]
cellular protein complex disassembly	9	[CAPZA2, CAPZA3, CAPZB, CFL1, EIF5A, KIF2C, MTPN, RDX, STMN1]
actin filament bundle assembly	9	[EZR, PAK1, PFN1, PHACTR1, RAC1, RDX, RHOA, S100A10, STMN1]
actin filament bundle organization	9	[EZR, PAK1, PFN1, PHACTR1, RAC1, RDX, RHOA, S100A10, STMN1]
positive regulation of protein polymerization	9	[ACTR3, ARF1, ARPC1A, ARPC2, ARPC4, HSPA1A, PAK1, RAC1, RPS3]
Oocyte meiosis	9	[CALM1, CALM2, CALM3, CAMK2D, PPP1CB, SKP1, YWHAE, YWHAQ, YWHAZ]
Hippo signaling pathway	9	[ACTB, ACTG1, CTNNB1, PPP1CB, TGFB2, WNT5A, YWHAE, YWHAQ, YWHAZ]
myeloid cell homeostasis	9	[BCL2L11, CITED2, GATA3, GPI, HMGB1, INHBA, KIT, RPS17, SOD1]
epidermis development	9	[CDH3, CTNNB1, INHBA, IRF6, LELP1, PAFAH1B1, SOD1, TGFB2, WNT5A]
fat cell differentiation	9	[ADIG, ARL4A, DKKL1, GATA3, GPS2, MEX3C, NR4A3, PPARGC1A, WNT5A]
stem cell differentiation	9	[CFL1, CHD2, CITED2, HAND2, HNRNPU, KIT, LBH, OSR1, TGFB2]
connective tissue development	9	[CD44, CREB3L2, CTNNB1, HAND2, MEX3C, OSR1, PPARGC1A, PRRX1, WNT5A]
organic hydroxy compound biosynthetic process	9	[CDH3, DKKL1, GATA3, HAND2, INSIG2, PGP, QDPR, SOD1, WNT5A]
immune response-regulating cell surface receptor signaling pathway	9	[EZR, GATA3, KIT, LPXN, NR4A3, PHPT1, RPS3, TNFRSF21, UBE2N]
gastrulation	9	[CTNNB1, ELF5, GPI, INHBA, NR4A3, OSR1, RACK1, RTF1, WNT5A]
regulation of epithelial cell migration	9	[EFNA1, GATA3, HMGB1, HSPB1, JUN, RAB11A, RHOA, TGFB2, WNT5A]
skin development	9	[CDH3, CTNNB1, INHBA, IRF6, LELP1, PTGES3, STMN1, TGFB2, WNT5A]
development of primary male sexual characteristics	9	[BCL2L11, CITED2, GATA3, H3F3A, INHBA, KIT, NKX2-1, WNT5A, YBX3]
negative regulation of nervous system development	9	[BAG5, CTNNB1, EFNA1, EIF4E, FKBP4, MEIS1, TNFRSF21, VIM, WNT5A]
skeletal system morphogenesis	9	[CITED2, COL13A1, CTNNB1, DLX5, EIF4A3, HAS2, INSIG2, OSR1, PRRX1]
gliogenesis	9	[CTNNB1, GAP43, NKX2-1, PAFAH1B1, PHGDH, SOD1, TGFB2, TNFRSF21, VIM]
inner ear development	9	[DLX5, GATA3, GSDME, INSIG2, NR4A3, PAFAH1B1, PRRX1, SOD1, WNT5A]
telencephalon development	9	[CTNNB1, DLX5, INHBA, NKX2-1, NR4A3, PAFAH1B1, TRA2B, WNT5A, YWHAE]
male gonad development	9	[BCL2L11, CITED2, GATA3, H3F3A, INHBA, KIT, NKX2-1, WNT5A, YBX3]
ear morphogenesis	9	[DLX5, GATA3, INSIG2, NR4A3, OSR1, PRRX1, RPL38, SOD1, WNT5A]
mTOR signaling pathway	8	[ATP6V1C1, ATP6V1F, CAB39, EIF4E, LAMTOR4, RHOA, RPS6, WNT5A]
Necroptosis	8	[CAMK2D, CHMP5, GLUL, H2AFJ, HMGB1, HSP90AA1, PPIA, SLC25A6]
mRNA 3'-UTR binding	8	[DDX5, FXR1, HNRNPU, IGF2BP3, PCBP1, RPS7, SERBP1, YBX3]
regulation of DNA binding	8	[CTNNB1, GATA3, HABP4, HAND2, HMGB1, JUN, SUMO1, TAF10]
DNA recombination	8	[FOXP1, HMGB1, HMGB3, POLB, RUVBL1, SWI5, UBE2B, UBE2N]
protein stabilization	8	[EFNA1, GAPDH, HSP90AA1, LAMP1, RPL11, RPS7, SUMO1, UBE2B]
positive regulation of DNA binding transcription factor activity	8	[CTNNB1, KIT, MTPN, PPARGC1A, RPS3, UBE2N, UBE2V1, WNT5A]
regulation of vasculature development	8	[BTG1, CTNNB1, EFNA1, HMGB1, HSPB1, KIT, RHOA, WNT5A]
ribosomal large subunit assembly	8	[RPL10, RPL11, RPL12, RPL24, RPL3, RPL38, RPL5, RPL6]
positive regulation of intrinsic apoptotic signaling pathway	8	[GSDME, RACK1, RPL11, RPL26, RPS3, RPS7, UBA52, UBB]
epithelial to mesenchymal transition	8	[CTNNB1, DDX5, EFNA1, HAS2, MCRIP1, NKX2-1, TGFB2, WNT5A]
bone development	8	[CITED2, COL13A1, DLX5, HAS2, INSIG2, KIT, MEIS1, PAFAH1B1]
regulation of DNA binding	8	[CTNNB1, GATA3, HABP4, HAND2, HMGB1, JUN, SUMO1, TAF10]
microtubule associated complex	8	[BCL2L11, DYNLL1, DYNLL2, GABARAP, KIF22, KIF2C, KIF5C, PAFAH1B1]
microtubule-based transport	8	[BICD2, DYNLL1, DYNLL2, HSPB1, LAMP1, PAFAH1B1, UBA52, UBB]
transport along microtubule	8	[BICD2, DYNLL1, DYNLL2, HSPB1, LAMP1, PAFAH1B1, UBA52, UBB]
positive regulation of peptidase activity	8	[ADRM1, APOPT1, BCL2L11, EFNA1, HMGB1, PSME1, RACK1, RPS3]
positive regulation of endopeptidase activity	8	[ADRM1, APOPT1, BCL2L11, EFNA1, HMGB1, PSME1, RACK1, RPS3]
negative regulation of neuron death	8	[ATF4, CTNNB1, JUN, NR4A3, PPARGC1A, RACK1, RETREG1, SOD1]
positive regulation of intracellular transport	8	[CDH3, EZR, HSPA1L, OAZ1, PCNT, RDX, RUVBL1, UBL4B]
bone development	8	[CITED2, COL13A1, DLX5, HAS2, INSIG2, KIT, MEIS1, PAFAH1B1]
lamellipodium	8	[ACTR3, CAPZB, CD44, CFL1, CTNNB1, RAC1, RDX, RHOA]
regulation of DNA binding	8	[CTNNB1, GATA3, HABP4, HAND2, HMGB1, JUN, SUMO1, TAF10]
single-stranded RNA binding	8	[EIF4A3, FXR1, HMGB1, HNRNPU, LSM14A, POLR2D, SYNCRIP, TRA2B]
microtubule associated complex	8	[BCL2L11, DYNLL1, DYNLL2, GABARAP, KIF22, KIF2C, KIF5C, PAFAH1B1]
positive regulation of epithelial cell proliferation	8	[CDH3, CTNNB1, DLX5, FOXP1, JUN, NR4A3, OSR1, WNT5A]
epithelial cell development	8	[CTNNB1, EZR, PAFAH1B1, RAP1B, RDX, SOD1, VIM, WNT5A]
positive regulation of DNA binding transcription factor activity	8	[CTNNB1, KIT, MTPN, PPARGC1A, RPS3, UBE2N, UBE2V1, WNT5A]
positive regulation of DNA binding transcription factor activity	8	[CTNNB1, KIT, MTPN, PPARGC1A, RPS3, UBE2N, UBE2V1, WNT5A]
negative regulation of protein complex assembly	8	[CAPZA2, CAPZA3, CAPZB, HMGB1, LMO4, MTPN, RDX, STMN1]
mitochondrial respiratory chain	8	[COX1, COX4I1, COX7A2, COX7A2L, COX7B, NDUFA5, NDUFB2, SDHB]
DNA recombination	8	[FOXP1, HMGB1, HMGB3, POLB, RUVBL1, SWI5, UBE2B, UBE2N]
alcohol metabolic process	8	[FDX1, INSIG2, NPC2, PGP, QDPR, SOD1, SORD, TPI1]
monosaccharide biosynthetic process	8	[ATF4, FBP1, GPI, PGAM2, PGP, SDHAF3, SORD, TPI1]
hexose biosynthetic process	8	[ATF4, FBP1, GPI, PGAM2, PGP, SDHAF3, SORD, TPI1]
sister chromatid segregation	8	[CHMP5, CTNNB1, HNRNPU, KIF22, KIF2C, RAB11A, RAD21, SLF1]
Wnt signaling pathway	8	[CAMK2D, CTNNB1, JUN, RAC1, RHOA, RUVBL1, SKP1, WNT5A]
Axon guidance	8	[CAMK2D, CFL1, DPYSL2, EFNA1, PAK1, RAC1, RHOA, WNT5A]
microtubule cytoskeleton organization involved in mitosis	8	[CHMP5, HNRNPU, HSPA1A, PAFAH1B1, PCNT, RAB11A, RHOA, STMN1]
response to reactive oxygen species	8	[FKBP1A, JUN, NR4A3, PRDX5, RACK1, ROMO1, RPS3, SOD1]
microtubule polymerization or depolymerization	8	[CAPZB, FKBP4, HSPA1A, KIF2C, PAK1, RAC1, RPS3, STMN1]
regulation of DNA binding	8	[CTNNB1, GATA3, HABP4, HAND2, HMGB1, JUN, SUMO1, TAF10]
positive regulation of growth	8	[EZR, H3F3A, MTPN, RAB11A, RIMS2, SERP1, TGFB2, YBX3]
regulation of DNA binding	8	[CTNNB1, GATA3, HABP4, HAND2, HMGB1, JUN, SUMO1, TAF10]
negative regulation of cell development	8	[BAG5, CTNNB1, EFNA1, EIF4E, FKBP4, MEIS1, VIM, WNT5A]
negative regulation of neurogenesis	8	[BAG5, CTNNB1, EFNA1, EIF4E, FKBP4, MEIS1, VIM, WNT5A]
nucleobase-containing compound transport	8	[EIF4A3, EIF5A, KIF5C, LOC100299503, POLR2D, RPSA, SLC25A6, SRSF3]
hydrogen transport	8	[ATP6V1C1, ATP6V1F, COX1, COX3, COX4I1, COX7A2, COX7A2L, COX7B]
proton transport	8	[ATP6V1C1, ATP6V1F, COX1, COX3, COX4I1, COX7A2, COX7A2L, COX7B]
hydrogen ion transmembrane transporter activity	8	[ATP6V1C1, ATP6V1F, COX1, COX3, COX4I1, COX7A2, COX7A2L, COX7B]
hydrogen ion transmembrane transport	8	[ATP6V1C1, ATP6V1F, COX1, COX3, COX4I1, COX7A2, COX7A2L, COX7B]
epithelial cell development	8	[CTNNB1, EZR, PAFAH1B1, RAP1B, RDX, SOD1, VIM, WNT5A]
respiratory electron transport chain	8	[ALDH5A1, COX1, COX3, COX4I1, NDUFA5, POLG2, PPARGC1A, SDHB]
mitochondrial respiratory chain	8	[COX1, COX4I1, COX7A2, COX7A2L, COX7B, NDUFA5, NDUFB2, SDHB]
tube formation	8	[BCL2L11, CFL1, CITED2, CTNNB1, GATA3, LMO4, OSR1, WNT5A]
tube formation	8	[BCL2L11, CFL1, CITED2, CTNNB1, GATA3, LMO4, OSR1, WNT5A]
response to reactive oxygen species	8	[FKBP1A, JUN, NR4A3, PRDX5, RACK1, ROMO1, RPS3, SOD1]
negative regulation of neuron death	8	[ATF4, CTNNB1, JUN, NR4A3, PPARGC1A, RACK1, RETREG1, SOD1]
monosaccharide biosynthetic process	8	[ATF4, FBP1, GPI, PGAM2, PGP, SDHAF3, SORD, TPI1]
hexose biosynthetic process	8	[ATF4, FBP1, GPI, PGAM2, PGP, SDHAF3, SORD, TPI1]
positive regulation of protein catabolic process	8	[ARIH1, EZR, OAZ1, OAZ3, RACK1, RDX, SUMO1, WNT5A]
positive regulation of peptidase activity	8	[ADRM1, APOPT1, BCL2L11, EFNA1, HMGB1, PSME1, RACK1, RPS3]
positive regulation of endopeptidase activity	8	[ADRM1, APOPT1, BCL2L11, EFNA1, HMGB1, PSME1, RACK1, RPS3]
positive regulation of growth	8	[EZR, H3F3A, MTPN, RAB11A, RIMS2, SERP1, TGFB2, YBX3]
regulation of cell size	8	[DPYSL2, LAMTOR4, MTPN, RAB11A, RAC1, RDX, RHOA, WNT5A]
sister chromatid segregation	8	[CHMP5, CTNNB1, HNRNPU, KIF22, KIF2C, RAB11A, RAD21, SLF1]
regulation of response to DNA damage stimulus	8	[CD44, DDX5, HMGB1, HNRNPK, RPL26, RPS3, SLF1, UBE2N]
cell junction organization	8	[CTNNB1, RAC1, RAP1B, RASSF8, RDX, RHOA, S100A10, TGFB2]
positive regulation of intracellular transport	8	[CDH3, EZR, HSPA1L, OAZ1, PCNT, RDX, RUVBL1, UBL4B]
negative regulation of neuron death	8	[ATF4, CTNNB1, JUN, NR4A3, PPARGC1A, RACK1, RETREG1, SOD1]
cellular response to drug	8	[ATF4, CTNNB1, EIF4E, FBP1, FDX1, NR4A3, RACK1, RPS3]
hormone-mediated signaling pathway	8	[DDX5, FKBP4, LANCL2, LBH, NR4A3, PAK1, PAQR5, PTGES3]
cell junction organization	8	[CTNNB1, RAC1, RAP1B, RASSF8, RDX, RHOA, S100A10, TGFB2]
regulation of cell size	8	[DPYSL2, LAMTOR4, MTPN, RAB11A, RAC1, RDX, RHOA, WNT5A]
Melanogenesis	8	[CALM1, CALM2, CALM3, CAMK2D, CREB3L2, CTNNB1, KIT, WNT5A]
regulation of DNA binding	8	[CTNNB1, GATA3, HABP4, HAND2, HMGB1, JUN, SUMO1, TAF10]
protein-DNA complex subunit organization	8	[H3F3A, HILS1, HIST1H2BD, HMGB1, SWI5, TAF12, TNP1, TNP2]
positive regulation of intracellular transport	8	[CDH3, EZR, HSPA1L, OAZ1, PCNT, RDX, RUVBL1, UBL4B]
Influenza A	8	[ACTB, ACTG1, DNAJB1, HSPA1A, HSPA1L, JUN, PABPN1, SLC25A6]
transcription corepressor activity	8	[BHLHE41, CITED2, DNAJB1, GPS2, HDGF, HNRNPU, HSPA1A, NCOR1]
epithelial cell development	8	[CTNNB1, EZR, PAFAH1B1, RAP1B, RDX, SOD1, VIM, WNT5A]
Wnt signaling pathway	8	[CAMK2D, CTNNB1, JUN, RAC1, RHOA, RUVBL1, SKP1, WNT5A]
Axon guidance	8	[CAMK2D, CFL1, DPYSL2, EFNA1, PAK1, RAC1, RHOA, WNT5A]
cell junction organization	8	[CTNNB1, RAC1, RAP1B, RASSF8, RDX, RHOA, S100A10, TGFB2]
lamellipodium	8	[ACTR3, CAPZB, CD44, CFL1, CTNNB1, RAC1, RDX, RHOA]
regulation of DNA binding	8	[CTNNB1, GATA3, HABP4, HAND2, HMGB1, JUN, SUMO1, TAF10]
Axon guidance	8	[CAMK2D, CFL1, DPYSL2, EFNA1, PAK1, RAC1, RHOA, WNT5A]
regulation of cell size	8	[DPYSL2, LAMTOR4, MTPN, RAB11A, RAC1, RDX, RHOA, WNT5A]
epithelial cell development	8	[CTNNB1, EZR, PAFAH1B1, RAP1B, RDX, SOD1, VIM, WNT5A]
epithelial to mesenchymal transition	8	[CTNNB1, DDX5, EFNA1, HAS2, MCRIP1, NKX2-1, TGFB2, WNT5A]
Dopaminergic synapse	8	[ATF4, CALM1, CALM2, CALM3, CAMK2D, CREB3L2, KIF5C, PPP1CB]
Amphetamine addiction	8	[ATF4, CALM1, CALM2, CALM3, CAMK2D, CREB3L2, JUN, PPP1CB]
epithelial cell development	8	[CTNNB1, EZR, PAFAH1B1, RAP1B, RDX, SOD1, VIM, WNT5A]
regulation of DNA binding	8	[CTNNB1, GATA3, HABP4, HAND2, HMGB1, JUN, SUMO1, TAF10]
positive regulation of epithelial cell proliferation	8	[CDH3, CTNNB1, DLX5, FOXP1, JUN, NR4A3, OSR1, WNT5A]
regulation of cell size	8	[DPYSL2, LAMTOR4, MTPN, RAB11A, RAC1, RDX, RHOA, WNT5A]
positive regulation of peptidase activity	8	[ADRM1, APOPT1, BCL2L11, EFNA1, HMGB1, PSME1, RACK1, RPS3]
positive regulation of endopeptidase activity	8	[ADRM1, APOPT1, BCL2L11, EFNA1, HMGB1, PSME1, RACK1, RPS3]
Wnt signaling pathway	8	[CAMK2D, CTNNB1, JUN, RAC1, RHOA, RUVBL1, SKP1, WNT5A]
cell junction organization	8	[CTNNB1, RAC1, RAP1B, RASSF8, RDX, RHOA, S100A10, TGFB2]
lamellipodium	8	[ACTR3, CAPZB, CD44, CFL1, CTNNB1, RAC1, RDX, RHOA]
respiratory electron transport chain	8	[ALDH5A1, COX1, COX3, COX4I1, NDUFA5, POLG2, PPARGC1A, SDHB]
regulation of cell size	8	[DPYSL2, LAMTOR4, MTPN, RAB11A, RAC1, RDX, RHOA, WNT5A]
response to reactive oxygen species	8	[FKBP1A, JUN, NR4A3, PRDX5, RACK1, ROMO1, RPS3, SOD1]
cellular response to drug	8	[ATF4, CTNNB1, EIF4E, FBP1, FDX1, NR4A3, RACK1, RPS3]
negative regulation of neuron death	8	[ATF4, CTNNB1, JUN, NR4A3, PPARGC1A, RACK1, RETREG1, SOD1]
positive regulation of intrinsic apoptotic signaling pathway	8	[GSDME, RACK1, RPL11, RPL26, RPS3, RPS7, UBA52, UBB]
Wnt signaling pathway	8	[CAMK2D, CTNNB1, JUN, RAC1, RHOA, RUVBL1, SKP1, WNT5A]
Axon guidance	8	[CAMK2D, CFL1, DPYSL2, EFNA1, PAK1, RAC1, RHOA, WNT5A]
regulation of cell size	8	[DPYSL2, LAMTOR4, MTPN, RAB11A, RAC1, RDX, RHOA, WNT5A]
microtubule associated complex	8	[BCL2L11, DYNLL1, DYNLL2, GABARAP, KIF22, KIF2C, KIF5C, PAFAH1B1]
protein stabilization	8	[EFNA1, GAPDH, HSP90AA1, LAMP1, RPL11, RPS7, SUMO1, UBE2B]
regulation of DNA binding	8	[CTNNB1, GATA3, HABP4, HAND2, HMGB1, JUN, SUMO1, TAF10]
tube formation	8	[BCL2L11, CFL1, CITED2, CTNNB1, GATA3, LMO4, OSR1, WNT5A]
Axon guidance	8	[CAMK2D, CFL1, DPYSL2, EFNA1, PAK1, RAC1, RHOA, WNT5A]
regulation of cell size	8	[DPYSL2, LAMTOR4, MTPN, RAB11A, RAC1, RDX, RHOA, WNT5A]
transcription corepressor activity	8	[BHLHE41, CITED2, DNAJB1, GPS2, HDGF, HNRNPU, HSPA1A, NCOR1]
cell junction organization	8	[CTNNB1, RAC1, RAP1B, RASSF8, RDX, RHOA, S100A10, TGFB2]
lamellipodium	8	[ACTR3, CAPZB, CD44, CFL1, CTNNB1, RAC1, RDX, RHOA]
tube formation	8	[BCL2L11, CFL1, CITED2, CTNNB1, GATA3, LMO4, OSR1, WNT5A]
microtubule-based transport	8	[BICD2, DYNLL1, DYNLL2, HSPB1, LAMP1, PAFAH1B1, UBA52, UBB]
transport along microtubule	8	[BICD2, DYNLL1, DYNLL2, HSPB1, LAMP1, PAFAH1B1, UBA52, UBB]
microtubule associated complex	8	[BCL2L11, DYNLL1, DYNLL2, GABARAP, KIF22, KIF2C, KIF5C, PAFAH1B1]
DNA recombination	8	[FOXP1, HMGB1, HMGB3, POLB, RUVBL1, SWI5, UBE2B, UBE2N]
alcohol metabolic process	8	[FDX1, INSIG2, NPC2, PGP, QDPR, SOD1, SORD, TPI1]
lamellipodium	8	[ACTR3, CAPZB, CD44, CFL1, CTNNB1, RAC1, RDX, RHOA]
cell junction organization	8	[CTNNB1, RAC1, RAP1B, RASSF8, RDX, RHOA, S100A10, TGFB2]
lamellipodium	8	[ACTR3, CAPZB, CD44, CFL1, CTNNB1, RAC1, RDX, RHOA]
epithelial cell development	8	[CTNNB1, EZR, PAFAH1B1, RAP1B, RDX, SOD1, VIM, WNT5A]
regulation of vasculature development	8	[BTG1, CTNNB1, EFNA1, HMGB1, HSPB1, KIT, RHOA, WNT5A]
regulation of DNA binding	8	[CTNNB1, GATA3, HABP4, HAND2, HMGB1, JUN, SUMO1, TAF10]
core promoter binding	8	[ATF4, CHD2, CTNNB1, GATA3, H3F3A, HNRNPU, NKX2-1, NR4A3]
regulation of response to DNA damage stimulus	8	[CD44, DDX5, HMGB1, HNRNPK, RPL26, RPS3, SLF1, UBE2N]
core promoter binding	8	[ATF4, CHD2, CTNNB1, GATA3, H3F3A, HNRNPU, NKX2-1, NR4A3]
positive regulation of DNA binding transcription factor activity	8	[CTNNB1, KIT, MTPN, PPARGC1A, RPS3, UBE2N, UBE2V1, WNT5A]
hydrogen transport	8	[ATP6V1C1, ATP6V1F, COX1, COX3, COX4I1, COX7A2, COX7A2L, COX7B]
respiratory electron transport chain	8	[ALDH5A1, COX1, COX3, COX4I1, NDUFA5, POLG2, PPARGC1A, SDHB]
proton transport	8	[ATP6V1C1, ATP6V1F, COX1, COX3, COX4I1, COX7A2, COX7A2L, COX7B]
hydrogen ion transmembrane transporter activity	8	[ATP6V1C1, ATP6V1F, COX1, COX3, COX4I1, COX7A2, COX7A2L, COX7B]
hydrogen ion transmembrane transport	8	[ATP6V1C1, ATP6V1F, COX1, COX3, COX4I1, COX7A2, COX7A2L, COX7B]
mitochondrial respiratory chain	8	[COX1, COX4I1, COX7A2, COX7A2L, COX7B, NDUFA5, NDUFB2, SDHB]
transcription corepressor activity	8	[BHLHE41, CITED2, DNAJB1, GPS2, HDGF, HNRNPU, HSPA1A, NCOR1]
response to temperature stimulus	8	[CETN1, HSP90AA1, HSPA1A, POLR2D, SLU7, SOD1, SUMO1, YWHAE]
response to heat	8	[CETN1, HSP90AA1, HSPA1A, POLR2D, SLU7, SOD1, SUMO1, YWHAE]
negative regulation of cell development	8	[BAG5, CTNNB1, EFNA1, EIF4E, FKBP4, MEIS1, VIM, WNT5A]
negative regulation of neurogenesis	8	[BAG5, CTNNB1, EFNA1, EIF4E, FKBP4, MEIS1, VIM, WNT5A]
Calcium signaling pathway	8	[ATP2B1, CALM1, CALM2, CALM3, CAMK2D, PHKG2, PLCD4, SLC25A6]
Wnt signaling pathway	8	[CAMK2D, CTNNB1, JUN, RAC1, RHOA, RUVBL1, SKP1, WNT5A]
Dopaminergic synapse	8	[ATF4, CALM1, CALM2, CALM3, CAMK2D, CREB3L2, KIF5C, PPP1CB]
Melanogenesis	8	[CALM1, CALM2, CALM3, CAMK2D, CREB3L2, CTNNB1, KIT, WNT5A]
Amphetamine addiction	8	[ATF4, CALM1, CALM2, CALM3, CAMK2D, CREB3L2, JUN, PPP1CB]
Axon guidance	8	[CAMK2D, CFL1, DPYSL2, EFNA1, PAK1, RAC1, RHOA, WNT5A]
regulation of cell size	8	[DPYSL2, LAMTOR4, MTPN, RAB11A, RAC1, RDX, RHOA, WNT5A]
epithelial cell development	8	[CTNNB1, EZR, PAFAH1B1, RAP1B, RDX, SOD1, VIM, WNT5A]
core promoter binding	8	[ATF4, CHD2, CTNNB1, GATA3, H3F3A, HNRNPU, NKX2-1, NR4A3]
positive regulation of cell-cell adhesion	8	[CD44, CITED2, GATA3, HAS2, HMGB1, NR4A3, RPS3, WNT5A]
positive regulation of epithelial cell proliferation	8	[CDH3, CTNNB1, DLX5, FOXP1, JUN, NR4A3, OSR1, WNT5A]
regulation of vasculature development	8	[BTG1, CTNNB1, EFNA1, HMGB1, HSPB1, KIT, RHOA, WNT5A]
epithelial to mesenchymal transition	8	[CTNNB1, DDX5, EFNA1, HAS2, MCRIP1, NKX2-1, TGFB2, WNT5A]
protein-DNA complex subunit organization	8	[H3F3A, HILS1, HIST1H2BD, HMGB1, SWI5, TAF12, TNP1, TNP2]
ribosomal large subunit assembly	8	[RPL10, RPL11, RPL12, RPL24, RPL3, RPL38, RPL5, RPL6]
single-stranded RNA binding	8	[EIF4A3, FXR1, HMGB1, HNRNPU, LSM14A, POLR2D, SYNCRIP, TRA2B]
Axon guidance	8	[CAMK2D, CFL1, DPYSL2, EFNA1, PAK1, RAC1, RHOA, WNT5A]
cell junction organization	8	[CTNNB1, RAC1, RAP1B, RASSF8, RDX, RHOA, S100A10, TGFB2]
lamellipodium	8	[ACTR3, CAPZB, CD44, CFL1, CTNNB1, RAC1, RDX, RHOA]
microtubule polymerization or depolymerization	8	[CAPZB, FKBP4, HSPA1A, KIF2C, PAK1, RAC1, RPS3, STMN1]
Wnt signaling pathway	8	[CAMK2D, CTNNB1, JUN, RAC1, RHOA, RUVBL1, SKP1, WNT5A]
Salmonella infection	8	[ACTB, ACTG1, ARPC1A, ARPC2, ARPC4, JUN, PFN1, RAC1]
Influenza A	8	[ACTB, ACTG1, DNAJB1, HSPA1A, HSPA1L, JUN, PABPN1, SLC25A6]
cell junction organization	8	[CTNNB1, RAC1, RAP1B, RASSF8, RDX, RHOA, S100A10, TGFB2]
lamellipodium	8	[ACTR3, CAPZB, CD44, CFL1, CTNNB1, RAC1, RDX, RHOA]
positive regulation of protein catabolic process	8	[ARIH1, EZR, OAZ1, OAZ3, RACK1, RDX, SUMO1, WNT5A]
positive regulation of intrinsic apoptotic signaling pathway	8	[GSDME, RACK1, RPL11, RPL26, RPS3, RPS7, UBA52, UBB]
positive regulation of peptidase activity	8	[ADRM1, APOPT1, BCL2L11, EFNA1, HMGB1, PSME1, RACK1, RPS3]
positive regulation of endopeptidase activity	8	[ADRM1, APOPT1, BCL2L11, EFNA1, HMGB1, PSME1, RACK1, RPS3]
response to reactive oxygen species	8	[FKBP1A, JUN, NR4A3, PRDX5, RACK1, ROMO1, RPS3, SOD1]
cellular response to drug	8	[ATF4, CTNNB1, EIF4E, FBP1, FDX1, NR4A3, RACK1, RPS3]
negative regulation of neuron death	8	[ATF4, CTNNB1, JUN, NR4A3, PPARGC1A, RACK1, RETREG1, SOD1]
core promoter binding	8	[ATF4, CHD2, CTNNB1, GATA3, H3F3A, HNRNPU, NKX2-1, NR4A3]
sister chromatid segregation	8	[CHMP5, CTNNB1, HNRNPU, KIF22, KIF2C, RAB11A, RAD21, SLF1]
regulation of cell size	8	[DPYSL2, LAMTOR4, MTPN, RAB11A, RAC1, RDX, RHOA, WNT5A]
microtubule polymerization or depolymerization	8	[CAPZB, FKBP4, HSPA1A, KIF2C, PAK1, RAC1, RPS3, STMN1]
microtubule cytoskeleton organization involved in mitosis	8	[CHMP5, HNRNPU, HSPA1A, PAFAH1B1, PCNT, RAB11A, RHOA, STMN1]
regulation of nuclear division	8	[CHMP5, HNRNPU, HSPA1A, NPM2, RAD21, SLF1, UBE2B, WNT5A]
regulation of response to DNA damage stimulus	8	[CD44, DDX5, HMGB1, HNRNPK, RPL26, RPS3, SLF1, UBE2N]
positive regulation of intrinsic apoptotic signaling pathway	8	[GSDME, RACK1, RPL11, RPL26, RPS3, RPS7, UBA52, UBB]
regulation of intrinsic apoptotic signaling pathway by p53 class mediator	8	[ANKRD2, CD44, HNRNPK, RPL11, RPL26, RPS7, UBA52, UBB]
Axon guidance	8	[CAMK2D, CFL1, DPYSL2, EFNA1, PAK1, RAC1, RHOA, WNT5A]
positive regulation of epithelial cell proliferation	8	[CDH3, CTNNB1, DLX5, FOXP1, JUN, NR4A3, OSR1, WNT5A]
negative regulation of cell development	8	[BAG5, CTNNB1, EFNA1, EIF4E, FKBP4, MEIS1, VIM, WNT5A]
regulation of vasculature development	8	[BTG1, CTNNB1, EFNA1, HMGB1, HSPB1, KIT, RHOA, WNT5A]
negative regulation of neurogenesis	8	[BAG5, CTNNB1, EFNA1, EIF4E, FKBP4, MEIS1, VIM, WNT5A]
alcohol metabolic process	8	[FDX1, INSIG2, NPC2, PGP, QDPR, SOD1, SORD, TPI1]
monosaccharide biosynthetic process	8	[ATF4, FBP1, GPI, PGAM2, PGP, SDHAF3, SORD, TPI1]
hexose biosynthetic process	8	[ATF4, FBP1, GPI, PGAM2, PGP, SDHAF3, SORD, TPI1]
Axon guidance	8	[CAMK2D, CFL1, DPYSL2, EFNA1, PAK1, RAC1, RHOA, WNT5A]
positive regulation of cell-cell adhesion	8	[CD44, CITED2, GATA3, HAS2, HMGB1, NR4A3, RPS3, WNT5A]
regulation of response to DNA damage stimulus	8	[CD44, DDX5, HMGB1, HNRNPK, RPL26, RPS3, SLF1, UBE2N]
immune response-activating cell surface receptor signaling pathway	8	[EZR, GATA3, LPXN, NR4A3, PHPT1, RPS3, TNFRSF21, UBE2N]
regulation of vasculature development	8	[BTG1, CTNNB1, EFNA1, HMGB1, HSPB1, KIT, RHOA, WNT5A]
Axon guidance	8	[CAMK2D, CFL1, DPYSL2, EFNA1, PAK1, RAC1, RHOA, WNT5A]
Salmonella infection	8	[ACTB, ACTG1, ARPC1A, ARPC2, ARPC4, JUN, PFN1, RAC1]
cell junction organization	8	[CTNNB1, RAC1, RAP1B, RASSF8, RDX, RHOA, S100A10, TGFB2]
lamellipodium	8	[ACTR3, CAPZB, CD44, CFL1, CTNNB1, RAC1, RDX, RHOA]
regulation of cell size	8	[DPYSL2, LAMTOR4, MTPN, RAB11A, RAC1, RDX, RHOA, WNT5A]
epithelial cell development	8	[CTNNB1, EZR, PAFAH1B1, RAP1B, RDX, SOD1, VIM, WNT5A]
microtubule polymerization or depolymerization	8	[CAPZB, FKBP4, HSPA1A, KIF2C, PAK1, RAC1, RPS3, STMN1]
negative regulation of protein complex assembly	8	[CAPZA2, CAPZA3, CAPZB, HMGB1, LMO4, MTPN, RDX, STMN1]
protein depolymerization	8	[CAPZA2, CAPZA3, CAPZB, CFL1, KIF2C, MTPN, RDX, STMN1]
Wnt signaling pathway	8	[CAMK2D, CTNNB1, JUN, RAC1, RHOA, RUVBL1, SKP1, WNT5A]
Axon guidance	8	[CAMK2D, CFL1, DPYSL2, EFNA1, PAK1, RAC1, RHOA, WNT5A]
palate development	8	[DLX5, HAND2, INHBA, INSIG2, OSR1, PRRX1, SUMO1, WNT5A]
positive regulation of cell-cell adhesion	8	[CD44, CITED2, GATA3, HAS2, HMGB1, NR4A3, RPS3, WNT5A]
cellular response to drug	8	[ATF4, CTNNB1, EIF4E, FBP1, FDX1, NR4A3, RACK1, RPS3]
regulation of DNA binding	8	[CTNNB1, GATA3, HABP4, HAND2, HMGB1, JUN, SUMO1, TAF10]
regulation of cell size	8	[DPYSL2, LAMTOR4, MTPN, RAB11A, RAC1, RDX, RHOA, WNT5A]
tube formation	8	[BCL2L11, CFL1, CITED2, CTNNB1, GATA3, LMO4, OSR1, WNT5A]
positive regulation of epithelial cell proliferation	8	[CDH3, CTNNB1, DLX5, FOXP1, JUN, NR4A3, OSR1, WNT5A]
epithelial cell development	8	[CTNNB1, EZR, PAFAH1B1, RAP1B, RDX, SOD1, VIM, WNT5A]
negative regulation of cell development	8	[BAG5, CTNNB1, EFNA1, EIF4E, FKBP4, MEIS1, VIM, WNT5A]
cartilage development	8	[CD44, CREB3L2, CTNNB1, HAND2, MEX3C, OSR1, PRRX1, WNT5A]
bone development	8	[CITED2, COL13A1, DLX5, HAS2, INSIG2, KIT, MEIS1, PAFAH1B1]
negative regulation of neuron death	8	[ATF4, CTNNB1, JUN, NR4A3, PPARGC1A, RACK1, RETREG1, SOD1]
core promoter binding	8	[ATF4, CHD2, CTNNB1, GATA3, H3F3A, HNRNPU, NKX2-1, NR4A3]
immune response-activating cell surface receptor signaling pathway	8	[EZR, GATA3, LPXN, NR4A3, PHPT1, RPS3, TNFRSF21, UBE2N]
regulation of vasculature development	8	[BTG1, CTNNB1, EFNA1, HMGB1, HSPB1, KIT, RHOA, WNT5A]
epithelial to mesenchymal transition	8	[CTNNB1, DDX5, EFNA1, HAS2, MCRIP1, NKX2-1, TGFB2, WNT5A]
negative regulation of neurogenesis	8	[BAG5, CTNNB1, EFNA1, EIF4E, FKBP4, MEIS1, VIM, WNT5A]
single-stranded DNA binding	7	[HMGB1, HNRNPU, PCBP1, POLR2D, RTF1, YBX1, YBX3]
histone binding	7	[BRD9, CHD2, CHD5, H3F3A, HMGB1, MPHOSPH8, SPIN1]
cofactor biosynthetic process	7	[ASPDH, COQ10B, MAT2A, PDHA2, QDPR, SLC25A39, SOD1]
regulated exocytosis	7	[CPLX2, KIT, LAMP1, NR4A3, RAB15, RAP1B, RIMS2]
kinase regulator activity	7	[CAB39, CCNY, HMGB1, HSPB1, PKIG, RACK1, RPLP1]
protein kinase regulator activity	7	[CAB39, CCNY, HMGB1, HSPB1, PKIG, RACK1, RPLP1]
cellular ketone metabolic process	7	[COQ10B, DKKL1, INSIG2, NMT1, NR4A3, PPARGC1A, SRD5A1]
chaperone binding	7	[BAG1, BAG5, DNAJA4, DNAJB7, DNAJB8, GET4, SOD1]
inner ear morphogenesis	7	[DLX5, GATA3, INSIG2, NR4A3, PRRX1, SOD1, WNT5A]
cytokinesis	7	[ACTR3, ARF1, CFL1, RAB11A, RHOA, STMN1, TRIM36]
positive regulation of chromosome organization	7	[CTNNB1, GATA3, HNRNPU, RAD21, RTF1, SLF1, UBE2N]
translational elongation	7	[EEF1A1, EEF1D, EEF1G, EEF2, EIF5A, RACK1, RPLP1]
cytokinesis	7	[ACTR3, ARF1, CFL1, RAB11A, RHOA, STMN1, TRIM36]
mitotic spindle organization	7	[CHMP5, HNRNPU, HSPA1A, PCNT, RAB11A, RHOA, STMN1]
Hepatocellular carcinoma	7	[ACTB, ACTG1, CTNNB1, GSTM1, GSTO2, TGFB2, WNT5A]
midbrain development	7	[ACTB, CTNNB1, DYNLL1, RHOA, WNT5A, YWHAE, YWHAQ]
nuclear-transcribed mRNA catabolic process	7	[CNOT7, CSDE1, DDX5, EIF3E, EIF4A3, PABPC1, POLR2D]
hormone receptor binding	7	[CTNNB1, DDX5, FKBP4, NCOR1, PPARGC1A, SUMO1, TAF10]
nuclear hormone receptor binding	7	[CTNNB1, DDX5, FKBP4, NCOR1, PPARGC1A, SUMO1, TAF10]
ribosomal small subunit assembly	7	[RPL38, RPS15, RPS17, RPS19, RPS28, RPS5, RPSA]
regulation of microtubule polymerization or depolymerization	7	[CAPZB, FKBP4, HSPA1A, PAK1, RAC1, RPS3, STMN1]
spindle assembly	7	[CHMP5, HNRNPU, HSPA1A, NCOR1, RAB11A, RHOA, RPS3]
positive regulation of peptide secretion	7	[EZR, GATA3, GPI, HMGB1, SERP1, TGFB2, WNT5A]
positive regulation of protein secretion	7	[EZR, GATA3, GPI, HMGB1, SERP1, TGFB2, WNT5A]
myeloid leukocyte differentiation	7	[CITED2, CTNNB1, GATA3, JUN, KIT, PAFAH1B1, TCTA]
cytokinesis	7	[ACTR3, ARF1, CFL1, RAB11A, RHOA, STMN1, TRIM36]
myeloid leukocyte differentiation	7	[CITED2, CTNNB1, GATA3, JUN, KIT, PAFAH1B1, TCTA]
double-stranded RNA binding	7	[FXR1, HMGB1, HNRNPU, ILF2, LSM14A, TUBB4B, VIM]
T cell proliferation	7	[CTNNB1, FKBP1A, HMGB1, LGALS3, PELI1, RPS3, TNFRSF21]
positive regulation of protein modification by small protein conjugation or removal	7	[DCUN1D1, DCUN1D5, FKBP1A, PELI1, UBA52, UBB, UBE2N]
positive regulation of protein ubiquitination	7	[DCUN1D1, DCUN1D5, FKBP1A, PELI1, UBA52, UBB, UBE2N]
positive regulation of multi-organism process	7	[BCL2L11, CFL1, CNOT7, INHBA, JUN, PRSS37, SRPK2]
enhancer binding	7	[ACTB, CHD4, GATA3, H3F3A, JUN, LMO4, SLC2A4RG]
enhancer sequence-specific DNA binding	7	[ACTB, CHD4, GATA3, H3F3A, JUN, LMO4, SLC2A4RG]
negative regulation of cytoskeleton organization	7	[CAPZA2, CAPZA3, CAPZB, FKBP4, MTPN, RDX, STMN1]
ribosomal small subunit assembly	7	[RPL38, RPS15, RPS17, RPS19, RPS28, RPS5, RPSA]
negative regulation of MAPK cascade	7	[DUSP14, EFNA1, EZR, GPS2, NCOR1, PAFAH1B1, VRK3]
osteoblast differentiation	7	[CTNNB1, DLX5, H3F3A, HAND2, HEMGN, HNRNPU, SYNCRIP]
appendage development	7	[BCL2L11, CTNNB1, DLX5, HAND2, OSR1, PRRX1, WNT5A]
appendage morphogenesis	7	[BCL2L11, CTNNB1, DLX5, HAND2, OSR1, PRRX1, WNT5A]
limb development	7	[BCL2L11, CTNNB1, DLX5, HAND2, OSR1, PRRX1, WNT5A]
limb morphogenesis	7	[BCL2L11, CTNNB1, DLX5, HAND2, OSR1, PRRX1, WNT5A]
embryonic appendage morphogenesis	7	[BCL2L11, CTNNB1, DLX5, HAND2, OSR1, PRRX1, WNT5A]
embryonic limb morphogenesis	7	[BCL2L11, CTNNB1, DLX5, HAND2, OSR1, PRRX1, WNT5A]
T cell proliferation	7	[CTNNB1, FKBP1A, HMGB1, LGALS3, PELI1, RPS3, TNFRSF21]
chromosome localization	7	[ACTR3, CHMP5, HNRNPU, KIF22, KIF2C, RAB11A, UBE2B]
establishment of chromosome localization	7	[ACTR3, CHMP5, HNRNPU, KIF22, KIF2C, RAB11A, UBE2B]
regulated exocytosis	7	[CPLX2, KIT, LAMP1, NR4A3, RAB15, RAP1B, RIMS2]
formation of primary germ layer	7	[CTNNB1, ELF5, GPI, INHBA, NR4A3, RTF1, WNT5A]
spindle assembly	7	[CHMP5, HNRNPU, HSPA1A, NCOR1, RAB11A, RHOA, RPS3]
negative regulation of cytoskeleton organization	7	[CAPZA2, CAPZA3, CAPZB, FKBP4, MTPN, RDX, STMN1]
regulation of microtubule polymerization or depolymerization	7	[CAPZB, FKBP4, HSPA1A, PAK1, RAC1, RPS3, STMN1]
myeloid leukocyte differentiation	7	[CITED2, CTNNB1, GATA3, JUN, KIT, PAFAH1B1, TCTA]
negative regulation of neuron differentiation	7	[BAG5, EFNA1, EIF4E, FKBP4, MEIS1, VIM, WNT5A]
establishment of RNA localization	7	[EIF4A3, EIF5A, KIF5C, LOC100299503, POLR2D, RPSA, SRSF3]
RNA transport	7	[EIF4A3, EIF5A, KIF5C, LOC100299503, POLR2D, RPSA, SRSF3]
nucleic acid transport	7	[EIF4A3, EIF5A, KIF5C, LOC100299503, POLR2D, RPSA, SRSF3]
I band	7	[ANKRD2, CAPZB, CTNNB1, FKBP1A, HSPB1, JPH1, MYL12A]
response to metal ion	7	[CPNE2, FBP1, JUN, KCNMB1, SLC30A7, SUMO1, WNT5A]
developmental cell growth	7	[CTNNB1, DPYSL2, MEX3C, NRN1, RAB11A, RIMS2, WNT5A]
activating transcription factor binding	7	[BHLHE41, CITED2, CTNNB1, JUN, NCOR1, PTMA, TAF12]
nuclear transcription factor complex	7	[ATF4, CTNNB1, GTF2F2, HNRNPU, JUN, TAF10, TAF12]
myeloid leukocyte differentiation	7	[CITED2, CTNNB1, GATA3, JUN, KIT, PAFAH1B1, TCTA]
RNA polymerase II transcription factor complex	7	[ATF4, CTNNB1, GTF2F2, HNRNPU, JUN, TAF10, TAF12]
ubiquitin-like protein binding	7	[ADRM1, C23H6orf106, DCUN1D1, DCUN1D5, OTUB2, UBE2N, UBXN11]
positive regulation of protein modification by small protein conjugation or removal	7	[DCUN1D1, DCUN1D5, FKBP1A, PELI1, UBA52, UBB, UBE2N]
positive regulation of protein ubiquitination	7	[DCUN1D1, DCUN1D5, FKBP1A, PELI1, UBA52, UBB, UBE2N]
Apoptosis	7	[ACTB, ACTG1, ATF4, BCL2L11, JUN, LMNB2, TUBA1B]
respiratory chain complex	7	[COX1, COX3, COX4I1, COX7B, NDUFA5, NDUFB2, SDHB]
negative regulation of cytokine production	7	[CDH3, EZR, GATA3, HMGB1, RAC1, TGFB2, TNFRSF21]
positive regulation of peptide secretion	7	[EZR, GATA3, GPI, HMGB1, SERP1, TGFB2, WNT5A]
positive regulation of protein secretion	7	[EZR, GATA3, GPI, HMGB1, SERP1, TGFB2, WNT5A]
antigen receptor-mediated signaling pathway	7	[EZR, GATA3, LPXN, PHPT1, RPS3, TNFRSF21, UBE2N]
morphogenesis of embryonic epithelium	7	[CFL1, CITED2, CTNNB1, GATA3, LMO4, OSR1, WNT5A]
epithelial tube formation	7	[CFL1, CITED2, CTNNB1, GATA3, LMO4, OSR1, WNT5A]
embryonic epithelial tube formation	7	[CFL1, CITED2, CTNNB1, GATA3, LMO4, OSR1, WNT5A]
cellular response to reactive oxygen species	7	[JUN, NR4A3, PRDX5, RACK1, ROMO1, RPS3, SOD1]
ribosomal small subunit assembly	7	[RPL38, RPS15, RPS17, RPS19, RPS28, RPS5, RPSA]
cellular response to reactive oxygen species	7	[JUN, NR4A3, PRDX5, RACK1, ROMO1, RPS3, SOD1]
regulation of cysteine-type endopeptidase activity involved in apoptotic process	7	[APOPT1, BCL2L11, CD44, HMGB1, PRDX5, RACK1, RPS3]
regulation of cysteine-type endopeptidase activity	7	[APOPT1, BCL2L11, CD44, HMGB1, PRDX5, RACK1, RPS3]
developmental cell growth	7	[CTNNB1, DPYSL2, MEX3C, NRN1, RAB11A, RIMS2, WNT5A]
mitotic sister chromatid segregation	7	[CHMP5, HNRNPU, KIF22, KIF2C, RAB11A, RAD21, SLF1]
regulated exocytosis	7	[CPLX2, KIT, LAMP1, NR4A3, RAB15, RAP1B, RIMS2]
establishment of cell polarity	7	[CFL1, GATA3, PAFAH1B1, RACK1, RAP1B, RHOA, WNT5A]
morphogenesis of embryonic epithelium	7	[CFL1, CITED2, CTNNB1, GATA3, LMO4, OSR1, WNT5A]
epithelial tube formation	7	[CFL1, CITED2, CTNNB1, GATA3, LMO4, OSR1, WNT5A]
endothelial cell migration	7	[EFNA1, GATA3, HMGB1, HSPB1, PTP4A2, RHOA, WNT5A]
embryonic epithelial tube formation	7	[CFL1, CITED2, CTNNB1, GATA3, LMO4, OSR1, WNT5A]
ruffle	7	[CFL1, EZR, HSP90AA1, PAK1, RAC1, RDX, RPS3]
leading edge membrane	7	[CD44, CFL1, EZR, HSP90AA1, PAK1, RAC1, RPS3]
ruffle	7	[CFL1, EZR, HSP90AA1, PAK1, RAC1, RDX, RPS3]
leading edge membrane	7	[CD44, CFL1, EZR, HSP90AA1, PAK1, RAC1, RPS3]
regulation of actin filament bundle assembly	7	[PAK1, PFN1, RAC1, RDX, RHOA, S100A10, STMN1]
regulation of microtubule polymerization or depolymerization	7	[CAPZB, FKBP4, HSPA1A, PAK1, RAC1, RPS3, STMN1]
steroid hormone mediated signaling pathway	7	[DDX5, FKBP4, LBH, NR4A3, PAK1, PAQR5, PTGES3]
Long-term potentiation	7	[ATF4, CALM1, CALM2, CALM3, CAMK2D, PPP1CB, RAP1B]
Hepatocellular carcinoma	7	[ACTB, ACTG1, CTNNB1, GSTM1, GSTO2, TGFB2, WNT5A]
activating transcription factor binding	7	[BHLHE41, CITED2, CTNNB1, JUN, NCOR1, PTMA, TAF12]
nuclear transcription factor complex	7	[ATF4, CTNNB1, GTF2F2, HNRNPU, JUN, TAF10, TAF12]
RNA polymerase II transcription factor complex	7	[ATF4, CTNNB1, GTF2F2, HNRNPU, JUN, TAF10, TAF12]
establishment of cell polarity	7	[CFL1, GATA3, PAFAH1B1, RACK1, RAP1B, RHOA, WNT5A]
enhancer binding	7	[ACTB, CHD4, GATA3, H3F3A, JUN, LMO4, SLC2A4RG]
enhancer sequence-specific DNA binding	7	[ACTB, CHD4, GATA3, H3F3A, JUN, LMO4, SLC2A4RG]
regulation of mitochondrion organization	7	[APOPT1, BCL2L11, HSPA1L, MLLT11, PPARGC1A, RUVBL1, UBL4B]
positive regulation of mitochondrion organization	7	[APOPT1, BCL2L11, HSPA1L, MLLT11, PPARGC1A, RUVBL1, UBL4B]
Hepatocellular carcinoma	7	[ACTB, ACTG1, CTNNB1, GSTM1, GSTO2, TGFB2, WNT5A]
cell-cell junction organization	7	[CTNNB1, RAC1, RASSF8, RDX, RHOA, S100A10, TGFB2]
acrosomal vesicle	7	[CAPZA3, CAPZB, CYLC1, DKKL1, PRSS37, TCP11, TRIM36]
nuclear transcription factor complex	7	[ATF4, CTNNB1, GTF2F2, HNRNPU, JUN, TAF10, TAF12]
RNA polymerase II transcription factor complex	7	[ATF4, CTNNB1, GTF2F2, HNRNPU, JUN, TAF10, TAF12]
nuclear-transcribed mRNA catabolic process	7	[CNOT7, CSDE1, DDX5, EIF3E, EIF4A3, PABPC1, POLR2D]
Aldosterone synthesis and secretion	7	[ATF4, ATP2B1, CALM1, CALM2, CALM3, CAMK2D, CREB3L2]
appendage development	7	[BCL2L11, CTNNB1, DLX5, HAND2, OSR1, PRRX1, WNT5A]
appendage morphogenesis	7	[BCL2L11, CTNNB1, DLX5, HAND2, OSR1, PRRX1, WNT5A]
limb development	7	[BCL2L11, CTNNB1, DLX5, HAND2, OSR1, PRRX1, WNT5A]
respiratory system development	7	[CTNNB1, DLX5, FOXP1, HMGB1, NKX2-1, PTGES3, WNT5A]
limb morphogenesis	7	[BCL2L11, CTNNB1, DLX5, HAND2, OSR1, PRRX1, WNT5A]
embryonic appendage morphogenesis	7	[BCL2L11, CTNNB1, DLX5, HAND2, OSR1, PRRX1, WNT5A]
embryonic limb morphogenesis	7	[BCL2L11, CTNNB1, DLX5, HAND2, OSR1, PRRX1, WNT5A]
central nervous system neuron differentiation	7	[CTNNB1, DLX5, INHBA, LMO4, NKX2-1, PAFAH1B1, WNT5A]
developmental cell growth	7	[CTNNB1, DPYSL2, MEX3C, NRN1, RAB11A, RIMS2, WNT5A]
regulation of cysteine-type endopeptidase activity involved in apoptotic process	7	[APOPT1, BCL2L11, CD44, HMGB1, PRDX5, RACK1, RPS3]
regulation of cysteine-type endopeptidase activity	7	[APOPT1, BCL2L11, CD44, HMGB1, PRDX5, RACK1, RPS3]
cell-cell junction organization	7	[CTNNB1, RAC1, RASSF8, RDX, RHOA, S100A10, TGFB2]
regulation of reproductive process	7	[CITED2, CTNNB1, INHBA, NPM2, PRSS37, UBE2B, WNT5A]
positive regulation of reproductive process	7	[CITED2, CTNNB1, INHBA, NPM2, PRSS37, UBE2B, WNT5A]
mesoderm development	7	[CITED2, GPI, INHBA, NR4A3, OSR1, RPL38, WNT5A]
formation of primary germ layer	7	[CTNNB1, ELF5, GPI, INHBA, NR4A3, RTF1, WNT5A]
morphogenesis of embryonic epithelium	7	[CFL1, CITED2, CTNNB1, GATA3, LMO4, OSR1, WNT5A]
epithelial tube formation	7	[CFL1, CITED2, CTNNB1, GATA3, LMO4, OSR1, WNT5A]
embryonic epithelial tube formation	7	[CFL1, CITED2, CTNNB1, GATA3, LMO4, OSR1, WNT5A]
T cell proliferation	7	[CTNNB1, FKBP1A, HMGB1, LGALS3, PELI1, RPS3, TNFRSF21]
respiratory chain complex	7	[COX1, COX3, COX4I1, COX7B, NDUFA5, NDUFB2, SDHB]
nuclear transcription factor complex	7	[ATF4, CTNNB1, GTF2F2, HNRNPU, JUN, TAF10, TAF12]
RNA polymerase II transcription factor complex	7	[ATF4, CTNNB1, GTF2F2, HNRNPU, JUN, TAF10, TAF12]
leukocyte chemotaxis	7	[CCL14, HMGB1, KIT, LGALS3, RAC1, S100A14, WNT5A]
endothelial cell migration	7	[EFNA1, GATA3, HMGB1, HSPB1, PTP4A2, RHOA, WNT5A]
response to metal ion	7	[CPNE2, FBP1, JUN, KCNMB1, SLC30A7, SUMO1, WNT5A]
cellular response to reactive oxygen species	7	[JUN, NR4A3, PRDX5, RACK1, ROMO1, RPS3, SOD1]
regulation of cysteine-type endopeptidase activity involved in apoptotic process	7	[APOPT1, BCL2L11, CD44, HMGB1, PRDX5, RACK1, RPS3]
regulation of cysteine-type endopeptidase activity	7	[APOPT1, BCL2L11, CD44, HMGB1, PRDX5, RACK1, RPS3]
activating transcription factor binding	7	[BHLHE41, CITED2, CTNNB1, JUN, NCOR1, PTMA, TAF12]
morphogenesis of embryonic epithelium	7	[CFL1, CITED2, CTNNB1, GATA3, LMO4, OSR1, WNT5A]
epithelial tube formation	7	[CFL1, CITED2, CTNNB1, GATA3, LMO4, OSR1, WNT5A]
embryonic epithelial tube formation	7	[CFL1, CITED2, CTNNB1, GATA3, LMO4, OSR1, WNT5A]
myeloid leukocyte differentiation	7	[CITED2, CTNNB1, GATA3, JUN, KIT, PAFAH1B1, TCTA]
regulation of nucleotide metabolic process	7	[COX7A2L, FBP1, NCOR1, PGAM2, PPARGC1A, RACK1, WNT5A]
negative regulation of protein catabolic process	7	[BAG5, DEDD, EFNA1, PSMF1, RPL11, RPS7, UBE2J1]
positive regulation of protein modification by small protein conjugation or removal	7	[DCUN1D1, DCUN1D5, FKBP1A, PELI1, UBA52, UBB, UBE2N]
positive regulation of protein ubiquitination	7	[DCUN1D1, DCUN1D5, FKBP1A, PELI1, UBA52, UBB, UBE2N]
negative regulation of protein catabolic process	7	[BAG5, DEDD, EFNA1, PSMF1, RPL11, RPS7, UBE2J1]
negative regulation of mRNA metabolic process	7	[HNRNPK, HNRNPU, PABPC1, SRSF9, SYNCRIP, TRA2B, YBX1]
morphogenesis of embryonic epithelium	7	[CFL1, CITED2, CTNNB1, GATA3, LMO4, OSR1, WNT5A]
epithelial tube formation	7	[CFL1, CITED2, CTNNB1, GATA3, LMO4, OSR1, WNT5A]
embryonic epithelial tube formation	7	[CFL1, CITED2, CTNNB1, GATA3, LMO4, OSR1, WNT5A]
developmental cell growth	7	[CTNNB1, DPYSL2, MEX3C, NRN1, RAB11A, RIMS2, WNT5A]
cell-cell junction organization	7	[CTNNB1, RAC1, RASSF8, RDX, RHOA, S100A10, TGFB2]
formation of primary germ layer	7	[CTNNB1, ELF5, GPI, INHBA, NR4A3, RTF1, WNT5A]
morphogenesis of embryonic epithelium	7	[CFL1, CITED2, CTNNB1, GATA3, LMO4, OSR1, WNT5A]
epithelial tube formation	7	[CFL1, CITED2, CTNNB1, GATA3, LMO4, OSR1, WNT5A]
embryonic epithelial tube formation	7	[CFL1, CITED2, CTNNB1, GATA3, LMO4, OSR1, WNT5A]
central nervous system neuron differentiation	7	[CTNNB1, DLX5, INHBA, LMO4, NKX2-1, PAFAH1B1, WNT5A]
negative regulation of cytokine production	7	[CDH3, EZR, GATA3, HMGB1, RAC1, TGFB2, TNFRSF21]
endothelial cell migration	7	[EFNA1, GATA3, HMGB1, HSPB1, PTP4A2, RHOA, WNT5A]
positive regulation of peptide secretion	7	[EZR, GATA3, GPI, HMGB1, SERP1, TGFB2, WNT5A]
positive regulation of protein secretion	7	[EZR, GATA3, GPI, HMGB1, SERP1, TGFB2, WNT5A]
regulation of reproductive process	7	[CITED2, CTNNB1, INHBA, NPM2, PRSS37, UBE2B, WNT5A]
positive regulation of reproductive process	7	[CITED2, CTNNB1, INHBA, NPM2, PRSS37, UBE2B, WNT5A]
mesoderm development	7	[CITED2, GPI, INHBA, NR4A3, OSR1, RPL38, WNT5A]
formation of primary germ layer	7	[CTNNB1, ELF5, GPI, INHBA, NR4A3, RTF1, WNT5A]
morphogenesis of embryonic epithelium	7	[CFL1, CITED2, CTNNB1, GATA3, LMO4, OSR1, WNT5A]
epithelial tube formation	7	[CFL1, CITED2, CTNNB1, GATA3, LMO4, OSR1, WNT5A]
embryonic epithelial tube formation	7	[CFL1, CITED2, CTNNB1, GATA3, LMO4, OSR1, WNT5A]
central nervous system neuron differentiation	7	[CTNNB1, DLX5, INHBA, LMO4, NKX2-1, PAFAH1B1, WNT5A]
cellular ketone metabolic process	7	[COQ10B, DKKL1, INSIG2, NMT1, NR4A3, PPARGC1A, SRD5A1]
inner ear morphogenesis	7	[DLX5, GATA3, INSIG2, NR4A3, PRRX1, SOD1, WNT5A]
[truncated: 2,731 more rows]

## Sheet: Upregulated
GOTerm	Nr. Genes	Associated Genes Found
metanephros development	3	[PDGFA, SALL1, SIX1]
glial cell migration	3	[CCR2, GPR183, RTN4]
positive regulation of protein kinase B signaling	3	[PDGFA, RTN4, SPRY2]
fibroblast growth factor receptor signaling pathway	3	[FLRT2, FRS2, SPRY2]
pallium development	5	[ATOH1, EOMES, KCNA1, PROX1, RTN4]
actin cytoskeleton reorganization	3	[ARHGDIB, MYH9, RAP2A]
regulation of dendrite development	3	[BMP5, RAP2A, YWHAH]
regulation of protein autophosphorylation	4	[ERRFI1, PDGFA, RAP2A, RAP2B]
positive regulation of protein autophosphorylation	3	[PDGFA, RAP2A, RAP2B]
tumor necrosis factor receptor superfamily binding	4	[BEX3, FEM1B, NGF, TNFSF12]
death receptor binding	3	[BEX3, FEM1B, NGF]
extrinsic apoptotic signaling pathway via death domain receptors	3	[BEX3, FEM1B, NGF]
voltage-gated potassium channel complex	3	[KCNA1, KCNA6, KCNJ2]
potassium channel activity	5	[CNGA3, KCNA1, KCNA6, KCNJ16, KCNJ2]
mechanosensitived potassium channel activity	5	[CNGA3, KCNA1, KCNA6, KCNJ16, KCNJ2]
voltage-gated potassium channel activity	5	[CNGA3, KCNA1, KCNA6, KCNJ16, KCNJ2]
cell fate specification	4	[ATOH1, EOMES, OLIG3, SIX1]
embryonic organ morphogenesis	10	[ATOH1, BLOC1S5, FRS2, HOXC4, PROX1, SALL1, SATB2, SIX1, SPRY2, TSHZ1]
ear development	8	[ATOH1, BLOC1S5, MAF, PROX1, SALL1, SIX1, SPRY2, TSHZ1]
inner ear development	6	[ATOH1, BLOC1S5, MAF, PROX1, SIX1, SPRY2]
neuron fate commitment	4	[ATOH1, OLIG3, SATB2, SIX1]
ear morphogenesis	6	[ATOH1, BLOC1S5, SALL1, SIX1, SPRY2, TSHZ1]
inner ear morphogenesis	4	[ATOH1, BLOC1S5, SIX1, SPRY2]
neuron fate specification	3	[ATOH1, OLIG3, SIX1]
morphogenesis of a branching structure	7	[FEM1B, FRS2, PROX1, RBM15, RTN4, SIX1, SPRY2]
ectodermal placode development	3	[FRS2, PROX1, SIX1]
ectodermal placode morphogenesis	3	[FRS2, PROX1, SIX1]
ectodermal placode formation	3	[FRS2, PROX1, SIX1]
tube formation	5	[BMP5, LUZP1, PRICKLE1, SIX1, SOX4]
negative regulation of lipid metabolic process	3	[BMP5, PDGFA, PROX1]
pancreas development	3	[BMP5, PROX1, SOX4]
cardiac chamber development	6	[BMP5, FRS2, LUZP1, PROX1, RBM15, SOX4]
cardiac septum development	6	[BMP5, FRS2, LUZP1, PROX1, RBM15, SOX4]
cardiocyte differentiation	4	[EOMES, FRS2, PRICKLE1, PROX1]
negative regulation of lipid biosynthetic process	3	[BMP5, PDGFA, PROX1]
epithelial tube formation	5	[BMP5, LUZP1, PRICKLE1, SIX1, SOX4]
cardiac septum morphogenesis	4	[BMP5, PROX1, RBM15, SOX4]
cardiac ventricle development	5	[FRS2, LUZP1, PROX1, RBM15, SOX4]
ventricular septum development	5	[FRS2, LUZP1, PROX1, RBM15, SOX4]
embryonic epithelial tube formation	5	[BMP5, LUZP1, PRICKLE1, SIX1, SOX4]
lens development in camera-type eye	3	[FRS2, MAF, PROX1]
artery development	5	[LUZP1, PRICKLE1, PROX1, SIX1, SOX4]
neural tube formation	4	[BMP5, LUZP1, PRICKLE1, SOX4]
ventricular septum morphogenesis	3	[PROX1, RBM15, SOX4]
lens fiber cell differentiation	3	[FRS2, MAF, PROX1]
artery morphogenesis	3	[PROX1, SIX1, SOX4]
aorta development	4	[PRICKLE1, PROX1, SIX1, SOX4]
aorta morphogenesis	3	[PROX1, SIX1, SOX4]
