# Supplementary material for: Cryopreservation process alters the expression of genes involved in pathways associated with the fertility of bull spermatozoa
Source: Front Genet. 2022 Oct 25;13:1025004. doi: 10.3389/fgene.2022.1025004 (PMC9640914; doi:10.3389/fgene.2022.1025004)
Supplement: Supplementary file 5 [file Table1.XLSX]

## Sheet: Total_Fresh
Total in fresh : 14280	Coverage of fresh
transcript:ENSBTAT00000063639	0.569001
transcript:ENSBTAT00000026794	0.597484
transcript:ENSBTAT00000014845	0.945587
transcript:ENSBTAT00000054234	1.1213
transcript:ENSBTAT00000026388	1.99553
transcript:ENSBTAT00000003637	2.05149
transcript:ENSBTAT00000063301	2.32839
transcript:ENSBTAT00000014910	2.40457
transcript:ENSBTAT00000044651	2.73854
transcript:ENSBTAT00000001898	2.87996
transcript:ENSBTAT00000006203	3.03986
transcript:ENSBTAT00000010781	3.12084
transcript:ENSBTAT00000025806	3.17174
transcript:ENSBTAT00000021503	3.18471
transcript:ENSBTAT00000066046	3.33379
transcript:ENSBTAT00000016419	3.42391
transcript:ENSBTAT00000006034	3.47208
transcript:ENSBTAT00000006673	3.50978
transcript:ENSBTAT00000012349	3.54685
transcript:ENSBTAT00000027077	3.60988
transcript:ENSBTAT00000022753	3.61254
transcript:ENSBTAT00000008848	3.62931
transcript:ENSBTAT00000031838	3.63863
transcript:ENSBTAT00000061325	3.73383
transcript:ENSBTAT00000003702	3.7908
transcript:ENSBTAT00000018748	3.86521
transcript:ENSBTAT00000020643	3.87985
transcript:ENSBTAT00000016693	3.88793
transcript:ENSBTAT00000028959	3.91125
transcript:ENSBTAT00000029061	3.97054
transcript:ENSBTAT00000066145	3.99907
transcript:ENSBTAT00000016601	4.03361
transcript:ENSBTAT00000014406	4.09948
transcript:ENSBTAT00000055221	4.15824
transcript:ENSBTAT00000019323	4.16467
transcript:ENSBTAT00000010762	4.28058
transcript:ENSBTAT00000003882	4.29174
transcript:ENSBTAT00000038767	4.30414
transcript:ENSBTAT00000000757	4.30475
transcript:ENSBTAT00000055447	4.31054
transcript:ENSBTAT00000031291	4.3543
transcript:ENSBTAT00000065931	4.35459
transcript:ENSBTAT00000001404	4.36577
transcript:ENSBTAT00000063750	4.37095
transcript:ENSBTAT00000024921	4.38948
transcript:ENSBTAT00000003082	4.41102
transcript:ENSBTAT00000015793	4.59498
transcript:ENSBTAT00000030589	4.61482
transcript:ENSBTAT00000008736	4.62594
transcript:ENSBTAT00000027480	4.63646
transcript:ENSBTAT00000039580	4.82908
transcript:ENSBTAT00000003575	4.84315
transcript:ENSBTAT00000009212	4.85024
transcript:ENSBTAT00000020764	4.85574
transcript:ENSBTAT00000006428	4.93827
transcript:ENSBTAT00000012098	4.95961
transcript:ENSBTAT00000042743	5.02764
transcript:ENSBTAT00000025356	5.06909
transcript:ENSBTAT00000018545	5.06981
transcript:ENSBTAT00000026362	5.07226
transcript:ENSBTAT00000065365	5.08962
transcript:ENSBTAT00000063051	5.09188
transcript:ENSBTAT00000023319	5.10316
transcript:ENSBTAT00000009669	5.17962
transcript:ENSBTAT00000063464	5.21759
transcript:ENSBTAT00000013145	5.22893
transcript:ENSBTAT00000063699	5.26907
transcript:ENSBTAT00000026521	5.27083
transcript:ENSBTAT00000007182	5.27918
transcript:ENSBTAT00000003690	5.33254
transcript:ENSBTAT00000019267	5.33683
transcript:ENSBTAT00000027940	5.3644
transcript:ENSBTAT00000052327	5.39693
transcript:ENSBTAT00000035307	5.40178
transcript:ENSBTAT00000004034	5.42564
transcript:ENSBTAT00000043470	5.44472
transcript:ENSBTAT00000004206	5.44564
transcript:ENSBTAT00000005167	5.50853
transcript:ENSBTAT00000057593	5.51489
transcript:ENSBTAT00000007971	5.5168
transcript:ENSBTAT00000014043	5.53161
transcript:ENSBTAT00000007515	5.56262
transcript:ENSBTAT00000009534	5.57541
transcript:ENSBTAT00000009255	5.58276
transcript:ENSBTAT00000027786	5.61283
transcript:ENSBTAT00000056136	5.6543
transcript:ENSBTAT00000065717	5.6612
transcript:ENSBTAT00000011892	5.67666
transcript:ENSBTAT00000055916	5.69061
transcript:ENSBTAT00000010372	5.76827
transcript:ENSBTAT00000002103	5.78444
transcript:ENSBTAT00000044320	5.79238
transcript:ENSBTAT00000027944	5.83706
transcript:ENSBTAT00000006494	5.84359
transcript:ENSBTAT00000042815	5.85529
transcript:ENSBTAT00000006020	5.8561
transcript:ENSBTAT00000020715	5.90752
transcript:ENSBTAT00000043434	5.94286
transcript:ENSBTAT00000065650	5.94286
transcript:ENSBTAT00000052145	5.94424
transcript:ENSBTAT00000002792	5.95821
transcript:ENSBTAT00000012837	5.96011
transcript:ENSBTAT00000022102	5.97814
transcript:ENSBTAT00000065901	5.97917
transcript:ENSBTAT00000018329	6.00718
transcript:ENSBTAT00000033161	6.01049
transcript:ENSBTAT00000014560	6.03548
transcript:ENSBTAT00000066052	6.0659
transcript:ENSBTAT00000044676	6.0688
transcript:ENSBTAT00000013582	6.09973
transcript:ENSBTAT00000024455	6.11558
transcript:ENSBTAT00000064126	6.11862
transcript:ENSBTAT00000045038	6.13375
transcript:ENSBTAT00000011004	6.14629
transcript:ENSBTAT00000023091	6.1505
transcript:ENSBTAT00000000988	6.19138
transcript:ENSBTAT00000014509	6.20296
transcript:ENSBTAT00000016089	6.20903
transcript:ENSBTAT00000004567	6.2315
transcript:ENSBTAT00000027147	6.27166
transcript:ENSBTAT00000065374	6.28042
transcript:ENSBTAT00000055955	6.29904
transcript:ENSBTAT00000007505	6.3021
transcript:ENSBTAT00000042737	6.31248
transcript:ENSBTAT00000021234	6.31309
transcript:ENSBTAT00000009407	6.31393
transcript:ENSBTAT00000026467	6.31542
transcript:ENSBTAT00000010971	6.32632
transcript:ENSBTAT00000017618	6.33125
transcript:ENSBTAT00000025660	6.34681
transcript:ENSBTAT00000016791	6.37739
transcript:ENSBTAT00000047843	6.37832
transcript:ENSBTAT00000011166	6.39765
transcript:ENSBTAT00000035254	6.42276
transcript:ENSBTAT00000020395	6.44508
transcript:ENSBTAT00000003981	6.49475
transcript:ENSBTAT00000021584	6.50391
transcript:ENSBTAT00000025189	6.51157
transcript:ENSBTAT00000015335	6.53961
transcript:ENSBTAT00000029397	6.54433
transcript:ENSBTAT00000035322	6.5885
transcript:ENSBTAT00000019121	6.65056
transcript:ENSBTAT00000065149	6.66102
transcript:ENSBTAT00000002158	6.68185
transcript:ENSBTAT00000002229	6.68443
transcript:ENSBTAT00000022088	6.7029
transcript:ENSBTAT00000014602	6.70495
transcript:ENSBTAT00000056937	6.71075
transcript:ENSBTAT00000057411	6.72087
transcript:ENSBTAT00000001940	6.72454
transcript:ENSBTAT00000053763	6.72796
transcript:ENSBTAT00000031986	6.7721
transcript:ENSBTAT00000022499	6.78032
transcript:ENSBTAT00000018360	6.78829
transcript:ENSBTAT00000053096	6.79212
transcript:ENSBTAT00000013535	6.83746
transcript:ENSBTAT00000026657	6.87709
transcript:ENSBTAT00000000859	6.91473
transcript:ENSBTAT00000005550	6.93611
transcript:ENSBTAT00000014879	6.95386
transcript:ENSBTAT00000033225	6.96773
transcript:ENSBTAT00000006264	6.97921
transcript:ENSBTAT00000028801	7.00647
transcript:ENSBTAT00000045273	7.03807
transcript:ENSBTAT00000035016	7.04781
transcript:ENSBTAT00000016118	7.05855
transcript:ENSBTAT00000016176	7.06899
transcript:ENSBTAT00000046615	7.07707
transcript:ENSBTAT00000018722	7.07916
transcript:ENSBTAT00000019199	7.08367
transcript:ENSBTAT00000005328	7.09106
transcript:ENSBTAT00000029250	7.09924
transcript:ENSBTAT00000003759	7.10582
transcript:ENSBTAT00000021364	7.1087
transcript:ENSBTAT00000050485	7.14679
transcript:ENSBTAT00000009798	7.15513
transcript:ENSBTAT00000045436	7.16498
transcript:ENSBTAT00000025261	7.16756
transcript:ENSBTAT00000054064	7.178
transcript:ENSBTAT00000017983	7.17977
transcript:ENSBTAT00000026527	7.21181
transcript:ENSBTAT00000008224	7.22309
transcript:ENSBTAT00000057035	7.24788
transcript:ENSBTAT00000014195	7.25968
transcript:ENSBTAT00000020997	7.27325
transcript:ENSBTAT00000063417	7.28564
transcript:ENSBTAT00000065373	7.28564
transcript:ENSBTAT00000000897	7.28571
transcript:ENSBTAT00000029400	7.29669
transcript:ENSBTAT00000046544	7.30838
transcript:ENSBTAT00000012255	7.32903
transcript:ENSBTAT00000043137	7.34539
transcript:ENSBTAT00000045025	7.35639
transcript:ENSBTAT00000030129	7.39645
transcript:ENSBTAT00000027665	7.3965
transcript:ENSBTAT00000032010	7.4573
transcript:ENSBTAT00000063330	7.49685
transcript:ENSBTAT00000061427	7.49944
transcript:ENSBTAT00000000677	7.51999
transcript:ENSBTAT00000014692	7.54342
transcript:ENSBTAT00000057299	7.5719
transcript:ENSBTAT00000011063	7.57333
transcript:ENSBTAT00000012340	7.59208
transcript:ENSBTAT00000061638	7.61556
transcript:ENSBTAT00000003608	7.61881
transcript:ENSBTAT00000003210	7.62048
transcript:ENSBTAT00000022557	7.62411
transcript:ENSBTAT00000024641	7.62502
transcript:ENSBTAT00000013088	7.63482
transcript:ENSBTAT00000037485	7.63646
transcript:ENSBTAT00000009771	7.64726
transcript:ENSBTAT00000043822	7.67441
transcript:ENSBTAT00000019268	7.68617
transcript:ENSBTAT00000053430	7.69406
transcript:ENSBTAT00000019663	7.69595
transcript:ENSBTAT00000028232	7.70019
transcript:ENSBTAT00000016087	7.74014
transcript:ENSBTAT00000055247	7.74812
transcript:ENSBTAT00000060561	7.75974
transcript:ENSBTAT00000022601	7.77462
transcript:ENSBTAT00000065583	7.77641
transcript:ENSBTAT00000019703	7.78073
transcript:ENSBTAT00000021795	7.78838
transcript:ENSBTAT00000000047	7.79712
transcript:ENSBTAT00000000564	7.80047
transcript:ENSBTAT00000011591	7.8527
transcript:ENSBTAT00000030194	7.86046
transcript:ENSBTAT00000009732	7.86474
transcript:ENSBTAT00000028862	7.88057
transcript:ENSBTAT00000017906	7.88101
transcript:ENSBTAT00000022654	7.88124
transcript:ENSBTAT00000026000	7.88157
transcript:ENSBTAT00000011314	7.88839
transcript:ENSBTAT00000064882	7.88839
transcript:ENSBTAT00000025086	7.89883
transcript:ENSBTAT00000015354	7.90186
transcript:ENSBTAT00000049041	7.91464
transcript:ENSBTAT00000029404	7.91983
transcript:ENSBTAT00000019840	7.92192
transcript:ENSBTAT00000042599	7.96419
transcript:ENSBTAT00000037413	7.96583
transcript:ENSBTAT00000025350	7.96789
transcript:ENSBTAT00000015465	7.9747
transcript:ENSBTAT00000061101	7.99756
transcript:ENSBTAT00000015459	8.00707
transcript:ENSBTAT00000021084	8.01582
transcript:ENSBTAT00000027458	8.0776
transcript:ENSBTAT00000008511	8.08351
transcript:ENSBTAT00000032500	8.09072
transcript:ENSBTAT00000027619	8.1143
transcript:ENSBTAT00000029367	8.118
transcript:ENSBTAT00000039182	8.12987
transcript:ENSBTAT00000006785	8.13698
transcript:ENSBTAT00000028349	8.14599
transcript:ENSBTAT00000022905	8.1514
transcript:ENSBTAT00000001047	8.15347
transcript:ENSBTAT00000061530	8.18859
transcript:ENSBTAT00000005506	8.1947
transcript:ENSBTAT00000000845	8.19617
transcript:ENSBTAT00000043659	8.21056
transcript:ENSBTAT00000055970	8.22702
transcript:ENSBTAT00000064461	8.23076
transcript:ENSBTAT00000013022	8.23191
transcript:ENSBTAT00000065241	8.24336
transcript:ENSBTAT00000029126	8.26745
transcript:ENSBTAT00000052368	8.27253
transcript:ENSBTAT00000003219	8.31406
transcript:ENSBTAT00000054342	8.33387
transcript:ENSBTAT00000014315	8.34185
transcript:ENSBTAT00000027693	8.34541
transcript:ENSBTAT00000065071	8.36081
transcript:ENSBTAT00000066119	8.36211
transcript:ENSBTAT00000006298	8.37975
transcript:ENSBTAT00000008240	8.40483
transcript:ENSBTAT00000064416	8.40737
transcript:ENSBTAT00000056899	8.43421
transcript:ENSBTAT00000002436	8.44207
transcript:ENSBTAT00000017105	8.48006
transcript:ENSBTAT00000042823	8.48946
transcript:ENSBTAT00000001080	8.49312
transcript:ENSBTAT00000064554	8.54271
transcript:ENSBTAT00000024289	8.56171
transcript:ENSBTAT00000006527	8.56869
transcript:ENSBTAT00000038676	8.59375
transcript:ENSBTAT00000060999	8.64579
transcript:ENSBTAT00000036738	8.64869
transcript:ENSBTAT00000010364	8.64912
transcript:ENSBTAT00000022893	8.66259
transcript:ENSBTAT00000032751	8.66674
transcript:ENSBTAT00000025492	8.67171
transcript:ENSBTAT00000039197	8.6791
transcript:ENSBTAT00000019089	8.69796
transcript:ENSBTAT00000064551	8.70478
transcript:ENSBTAT00000012247	8.7071
transcript:ENSBTAT00000014309	8.72218
transcript:ENSBTAT00000009478	8.72801
transcript:ENSBTAT00000066106	8.74295
transcript:ENSBTAT00000013078	8.75663
transcript:ENSBTAT00000030183	8.75834
transcript:ENSBTAT00000026598	8.78472
transcript:ENSBTAT00000013434	8.78882
transcript:ENSBTAT00000017840	8.80352
transcript:ENSBTAT00000008207	8.80882
transcript:ENSBTAT00000010619	8.81393
transcript:ENSBTAT00000012820	8.82078
transcript:ENSBTAT00000027769	8.83531
transcript:ENSBTAT00000024203	8.84165
transcript:ENSBTAT00000015828	8.8499
transcript:ENSBTAT00000005932	8.86426
transcript:ENSBTAT00000018739	8.88301
transcript:ENSBTAT00000020289	8.90877
transcript:ENSBTAT00000022732	8.93507
transcript:ENSBTAT00000005378	8.98496
transcript:ENSBTAT00000016930	8.9852
transcript:ENSBTAT00000001044	9.01337
transcript:ENSBTAT00000037513	9.01364
transcript:ENSBTAT00000008069	9.03884
transcript:ENSBTAT00000004926	9.03969
transcript:ENSBTAT00000004527	9.04003
transcript:ENSBTAT00000032645	9.04506
transcript:ENSBTAT00000020297	9.04574
transcript:ENSBTAT00000003924	9.06365
transcript:ENSBTAT00000010654	9.06365
transcript:ENSBTAT00000020675	9.08356
transcript:ENSBTAT00000054282	9.08718
transcript:ENSBTAT00000044278	9.10319
transcript:ENSBTAT00000020083	9.10799
transcript:ENSBTAT00000003944	9.118
transcript:ENSBTAT00000047009	9.12145
transcript:ENSBTAT00000047015	9.12145
transcript:ENSBTAT00000008200	9.15367
transcript:ENSBTAT00000018127	9.15663
transcript:ENSBTAT00000010897	9.16095
transcript:ENSBTAT00000042747	9.19301
transcript:ENSBTAT00000028438	9.19435
transcript:ENSBTAT00000018351	9.19724
transcript:ENSBTAT00000043317	9.20833
transcript:ENSBTAT00000015500	9.23636
transcript:ENSBTAT00000026853	9.24338
transcript:ENSBTAT00000025537	9.24548
transcript:ENSBTAT00000053185	9.24727
transcript:ENSBTAT00000029223	9.25568
transcript:ENSBTAT00000008883	9.26412
transcript:ENSBTAT00000013869	9.2661
transcript:ENSBTAT00000027366	9.26895
transcript:ENSBTAT00000000841	9.27798
transcript:ENSBTAT00000012676	9.28471
transcript:ENSBTAT00000063047	9.29648
transcript:ENSBTAT00000012262	9.31196
transcript:ENSBTAT00000047737	9.31323
transcript:ENSBTAT00000006774	9.33852
transcript:ENSBTAT00000064397	9.34609
transcript:ENSBTAT00000066162	9.34609
transcript:ENSBTAT00000005623	9.35641
transcript:ENSBTAT00000018572	9.36193
transcript:ENSBTAT00000016073	9.36898
transcript:ENSBTAT00000027065	9.37976
transcript:ENSBTAT00000021012	9.38136
transcript:ENSBTAT00000065912	9.39302
transcript:ENSBTAT00000028107	9.39577
transcript:ENSBTAT00000023352	9.4117
transcript:ENSBTAT00000013813	9.41312
transcript:ENSBTAT00000017306	9.44612
transcript:ENSBTAT00000043376	9.44982
transcript:ENSBTAT00000013993	9.46007
transcript:ENSBTAT00000065422	9.46673
transcript:ENSBTAT00000019836	9.47175
transcript:ENSBTAT00000005210	9.4722
transcript:ENSBTAT00000064004	9.48145
transcript:ENSBTAT00000009516	9.4971
transcript:ENSBTAT00000064483	9.4971
transcript:ENSBTAT00000004405	9.49853
transcript:ENSBTAT00000066133	9.49932
transcript:ENSBTAT00000026377	9.50457
transcript:ENSBTAT00000048872	9.52381
transcript:ENSBTAT00000019218	9.52807
transcript:ENSBTAT00000063804	9.52989
transcript:ENSBTAT00000022259	9.53818
transcript:ENSBTAT00000014490	9.54555
transcript:ENSBTAT00000014720	9.55235
transcript:ENSBTAT00000004296	9.55651
transcript:ENSBTAT00000042759	9.56308
transcript:ENSBTAT00000002583	9.56432
transcript:ENSBTAT00000032601	9.57306
transcript:ENSBTAT00000045529	9.58287
transcript:ENSBTAT00000004844	9.58458
transcript:ENSBTAT00000056742	9.58458
transcript:ENSBTAT00000004493	9.59144
transcript:ENSBTAT00000026769	9.59146
transcript:ENSBTAT00000024658	9.60376
transcript:ENSBTAT00000016540	9.60735
transcript:ENSBTAT00000025668	9.61672
transcript:ENSBTAT00000023783	9.61745
transcript:ENSBTAT00000012765	9.61942
transcript:ENSBTAT00000008730	9.62162
transcript:ENSBTAT00000001347	9.62567
transcript:ENSBTAT00000002832	9.62733
transcript:ENSBTAT00000061538	9.63656
transcript:ENSBTAT00000029896	9.63894
transcript:ENSBTAT00000019280	9.65211
transcript:ENSBTAT00000005154	9.65466
transcript:ENSBTAT00000022832	9.66081
transcript:ENSBTAT00000055646	9.70026
transcript:ENSBTAT00000013141	9.72336
transcript:ENSBTAT00000021369	9.72624
transcript:ENSBTAT00000027382	9.73065
transcript:ENSBTAT00000028315	9.73506
transcript:ENSBTAT00000039305	9.7427
transcript:ENSBTAT00000037049	9.75165
transcript:ENSBTAT00000015325	9.75688
transcript:ENSBTAT00000045897	9.76838
transcript:ENSBTAT00000000314	9.81458
transcript:ENSBTAT00000021122	9.83343
transcript:ENSBTAT00000008416	9.83978
transcript:ENSBTAT00000022687	9.84692
transcript:ENSBTAT00000047024	9.84804
transcript:ENSBTAT00000010723	9.86495
transcript:ENSBTAT00000008727	9.87221
transcript:ENSBTAT00000028149	9.87243
transcript:ENSBTAT00000050795	9.87586
transcript:ENSBTAT00000016378	9.87755
transcript:ENSBTAT00000033676	9.87994
transcript:ENSBTAT00000023759	9.88376
transcript:ENSBTAT00000047406	9.89939
transcript:ENSBTAT00000024011	9.91551
transcript:ENSBTAT00000015618	9.91698
transcript:ENSBTAT00000015274	9.94038
transcript:ENSBTAT00000029144	9.96441
transcript:ENSBTAT00000047005	9.97022
transcript:ENSBTAT00000016738	9.99803
transcript:ENSBTAT00000061246	9.99803
transcript:ENSBTAT00000065755	10.0264
transcript:ENSBTAT00000015938	10.0279
transcript:ENSBTAT00000023596	10.0331
transcript:ENSBTAT00000035445	10.0367
transcript:ENSBTAT00000024829	10.0392
transcript:ENSBTAT00000043080	10.0414
transcript:ENSBTAT00000018181	10.0604
transcript:ENSBTAT00000020233	10.0614
transcript:ENSBTAT00000015212	10.0626
transcript:ENSBTAT00000016231	10.069
transcript:ENSBTAT00000025245	10.0834
transcript:ENSBTAT00000056498	10.0852
transcript:ENSBTAT00000001581	10.1184
transcript:ENSBTAT00000022387	10.1312
transcript:ENSBTAT00000006987	10.1339
transcript:ENSBTAT00000003156	10.1388
transcript:ENSBTAT00000004199	10.1449
transcript:ENSBTAT00000027782	10.1615
transcript:ENSBTAT00000007169	10.2306
transcript:ENSBTAT00000019202	10.2429
transcript:ENSBTAT00000063844	10.2541
transcript:ENSBTAT00000015639	10.2625
transcript:ENSBTAT00000047161	10.265
transcript:ENSBTAT00000056305	10.2659
transcript:ENSBTAT00000064081	10.2692
transcript:ENSBTAT00000013929	10.2759
transcript:ENSBTAT00000003503	10.2775
transcript:ENSBTAT00000032823	10.2803
transcript:ENSBTAT00000016206	10.288
transcript:ENSBTAT00000065564	10.2895
transcript:ENSBTAT00000004398	10.2902
transcript:ENSBTAT00000012189	10.2957
transcript:ENSBTAT00000037763	10.2957
transcript:ENSBTAT00000066030	10.3003
transcript:ENSBTAT00000065106	10.3043
transcript:ENSBTAT00000028957	10.314
transcript:ENSBTAT00000065898	10.314
transcript:ENSBTAT00000000143	10.321
transcript:ENSBTAT00000046321	10.3365
transcript:ENSBTAT00000022994	10.3423
transcript:ENSBTAT00000035885	10.3444
transcript:ENSBTAT00000022163	10.3485
transcript:ENSBTAT00000003346	10.3501
transcript:ENSBTAT00000029249	10.3606
transcript:ENSBTAT00000003635	10.3618
transcript:ENSBTAT00000028330	10.3669
transcript:ENSBTAT00000048562	10.384
transcript:ENSBTAT00000010224	10.3852
transcript:ENSBTAT00000026519	10.3853
transcript:ENSBTAT00000021159	10.3909
transcript:ENSBTAT00000024759	10.4032
transcript:ENSBTAT00000014397	10.4072
transcript:ENSBTAT00000015097	10.4162
transcript:ENSBTAT00000021189	10.4199
transcript:ENSBTAT00000013607	10.4253
transcript:ENSBTAT00000006305	10.4275
transcript:ENSBTAT00000001576	10.4886
transcript:ENSBTAT00000044296	10.4924
transcript:ENSBTAT00000063136	10.4938
transcript:ENSBTAT00000052120	10.5142
transcript:ENSBTAT00000003758	10.5259
transcript:ENSBTAT00000012643	10.5273
transcript:ENSBTAT00000027241	10.5324
transcript:ENSBTAT00000027046	10.5341
transcript:ENSBTAT00000001071	10.5371
transcript:ENSBTAT00000027964	10.5399
transcript:ENSBTAT00000042795	10.5425
transcript:ENSBTAT00000034734	10.5645
transcript:ENSBTAT00000038458	10.5674
transcript:ENSBTAT00000012838	10.5857
transcript:ENSBTAT00000034021	10.5857
transcript:ENSBTAT00000017168	10.588
transcript:ENSBTAT00000043731	10.5951
transcript:ENSBTAT00000007026	10.5964
transcript:ENSBTAT00000044871	10.6034
transcript:ENSBTAT00000065738	10.6264
transcript:ENSBTAT00000000853	10.6277
transcript:ENSBTAT00000009690	10.6337
transcript:ENSBTAT00000015560	10.6391
transcript:ENSBTAT00000064095	10.6468
transcript:ENSBTAT00000024669	10.6483
transcript:ENSBTAT00000022637	10.6502
transcript:ENSBTAT00000027095	10.6505
transcript:ENSBTAT00000065013	10.6532
transcript:ENSBTAT00000000872	10.6814
transcript:ENSBTAT00000016835	10.6917
transcript:ENSBTAT00000029033	10.6922
transcript:ENSBTAT00000022045	10.6927
transcript:ENSBTAT00000045942	10.7027
transcript:ENSBTAT00000044838	10.7032
transcript:ENSBTAT00000005562	10.7104
transcript:ENSBTAT00000029098	10.7263
transcript:ENSBTAT00000066098	10.7708
transcript:ENSBTAT00000012813	10.7753
transcript:ENSBTAT00000015994	10.7909
transcript:ENSBTAT00000050851	10.7969
transcript:ENSBTAT00000024803	10.8048
transcript:ENSBTAT00000052281	10.8059
transcript:ENSBTAT00000017420	10.81
transcript:ENSBTAT00000021789	10.8411
transcript:ENSBTAT00000065311	10.8433
transcript:ENSBTAT00000017674	10.8441
transcript:ENSBTAT00000016768	10.8453
transcript:ENSBTAT00000064352	10.8499
transcript:ENSBTAT00000052722	10.8537
transcript:ENSBTAT00000043695	10.8613
transcript:ENSBTAT00000043580	10.8711
transcript:ENSBTAT00000045319	10.8835
transcript:ENSBTAT00000033672	10.8919
transcript:ENSBTAT00000013461	10.8979
transcript:ENSBTAT00000065579	10.9034
transcript:ENSBTAT00000043694	10.9067
transcript:ENSBTAT00000029943	10.9127
transcript:ENSBTAT00000016314	10.9167
transcript:ENSBTAT00000010891	10.9192
transcript:ENSBTAT00000031743	10.9659
transcript:ENSBTAT00000001141	10.9772
transcript:ENSBTAT00000008268	10.9934
transcript:ENSBTAT00000012594	11.0068
transcript:ENSBTAT00000009151	11.0104
transcript:ENSBTAT00000030356	11.0341
transcript:ENSBTAT00000035788	11.0362
transcript:ENSBTAT00000044769	11.0397
transcript:ENSBTAT00000000112	11.04
transcript:ENSBTAT00000006622	11.0413
transcript:ENSBTAT00000024157	11.0455
transcript:ENSBTAT00000005979	11.0492
transcript:ENSBTAT00000060953	11.0581
transcript:ENSBTAT00000016609	11.0587
transcript:ENSBTAT00000029353	11.0643
transcript:ENSBTAT00000012635	11.0969
transcript:ENSBTAT00000049813	11.1111
transcript:ENSBTAT00000018321	11.1244
transcript:ENSBTAT00000018591	11.1317
transcript:ENSBTAT00000011449	11.1323
transcript:ENSBTAT00000023277	11.1429
transcript:ENSBTAT00000063192	11.144
transcript:ENSBTAT00000008107	11.1472
transcript:ENSBTAT00000015248	11.1655
transcript:ENSBTAT00000011279	11.1746
transcript:ENSBTAT00000049485	11.1912
transcript:ENSBTAT00000028958	11.1953
transcript:ENSBTAT00000049460	11.1969
transcript:ENSBTAT00000029705	11.2008
transcript:ENSBTAT00000018574	11.2125
transcript:ENSBTAT00000001045	11.2192
transcript:ENSBTAT00000001534	11.2256
transcript:ENSBTAT00000027865	11.2363
transcript:ENSBTAT00000063746	11.2363
transcript:ENSBTAT00000064455	11.2386
transcript:ENSBTAT00000023204	11.241
transcript:ENSBTAT00000046362	11.2435
transcript:ENSBTAT00000023625	11.2604
transcript:ENSBTAT00000001735	11.2614
transcript:ENSBTAT00000064700	11.272
transcript:ENSBTAT00000039335	11.2753
transcript:ENSBTAT00000066016	11.2772
transcript:ENSBTAT00000009333	11.2785
transcript:ENSBTAT00000021456	11.2865
transcript:ENSBTAT00000004616	11.2886
transcript:ENSBTAT00000021260	11.3144
transcript:ENSBTAT00000034856	11.3166
transcript:ENSBTAT00000006959	11.3169
transcript:ENSBTAT00000000957	11.3178
transcript:ENSBTAT00000064075	11.3209
transcript:ENSBTAT00000008523	11.3302
transcript:ENSBTAT00000001972	11.351
transcript:ENSBTAT00000055791	11.3606
transcript:ENSBTAT00000005065	11.3633
transcript:ENSBTAT00000063228	11.3639
transcript:ENSBTAT00000064340	11.3695
transcript:ENSBTAT00000027379	11.3737
transcript:ENSBTAT00000016098	11.3752
transcript:ENSBTAT00000025850	11.3913
transcript:ENSBTAT00000001235	11.3917
transcript:ENSBTAT00000036128	11.3962
transcript:ENSBTAT00000044951	11.4009
transcript:ENSBTAT00000016302	11.4156
transcript:ENSBTAT00000017266	11.4205
transcript:ENSBTAT00000019928	11.4398
transcript:ENSBTAT00000013451	11.4475
transcript:ENSBTAT00000056161	11.448
transcript:ENSBTAT00000044979	11.4519
transcript:ENSBTAT00000026497	11.4932
transcript:ENSBTAT00000017397	11.5056
transcript:ENSBTAT00000019599	11.513
transcript:ENSBTAT00000022782	11.5142
transcript:ENSBTAT00000054392	11.5175
transcript:ENSBTAT00000009339	11.5175
transcript:ENSBTAT00000028102	11.522
transcript:ENSBTAT00000027968	11.5263
transcript:ENSBTAT00000012094	11.5376
transcript:ENSBTAT00000020104	11.5436
transcript:ENSBTAT00000065154	11.5469
transcript:ENSBTAT00000033400	11.5496
transcript:ENSBTAT00000018029	11.5593
transcript:ENSBTAT00000018907	11.5648
transcript:ENSBTAT00000032168	11.592
transcript:ENSBTAT00000013524	11.5927
transcript:ENSBTAT00000064659	11.6118
transcript:ENSBTAT00000028746	11.6133
transcript:ENSBTAT00000023779	11.6204
transcript:ENSBTAT00000035624	11.6214
transcript:ENSBTAT00000019988	11.6256
transcript:ENSBTAT00000001624	11.6268
transcript:ENSBTAT00000032713	11.627
transcript:ENSBTAT00000013623	11.6289
transcript:ENSBTAT00000061485	11.6298
transcript:ENSBTAT00000019119	11.63
transcript:ENSBTAT00000053508	11.6301
transcript:ENSBTAT00000034976	11.636
transcript:ENSBTAT00000063146	11.6529
transcript:ENSBTAT00000018119	11.6632
transcript:ENSBTAT00000011082	11.6654
transcript:ENSBTAT00000039684	11.671
transcript:ENSBTAT00000011001	11.688
transcript:ENSBTAT00000010998	11.6907
transcript:ENSBTAT00000052917	11.6923
transcript:ENSBTAT00000007580	11.6929
transcript:ENSBTAT00000000448	11.6981
transcript:ENSBTAT00000003331	11.7
transcript:ENSBTAT00000055387	11.704
transcript:ENSBTAT00000066051	11.7163
transcript:ENSBTAT00000034874	11.7166
transcript:ENSBTAT00000004611	11.7232
transcript:ENSBTAT00000044550	11.7326
transcript:ENSBTAT00000008078	11.7481
transcript:ENSBTAT00000027630	11.7499
transcript:ENSBTAT00000005354	11.7534
transcript:ENSBTAT00000022981	11.7563
transcript:ENSBTAT00000009350	11.7586
transcript:ENSBTAT00000017417	11.7628
transcript:ENSBTAT00000016680	11.7732
transcript:ENSBTAT00000001407	11.7734
transcript:ENSBTAT00000000419	11.7988
transcript:ENSBTAT00000009365	11.8109
transcript:ENSBTAT00000057115	11.813
transcript:ENSBTAT00000001237	11.8192
transcript:ENSBTAT00000009548	11.8384
transcript:ENSBTAT00000056475	11.8418
transcript:ENSBTAT00000064681	11.8438
transcript:ENSBTAT00000023383	11.8458
transcript:ENSBTAT00000043487	11.8509
transcript:ENSBTAT00000063469	11.8523
transcript:ENSBTAT00000065275	11.8653
transcript:ENSBTAT00000025185	11.8677
transcript:ENSBTAT00000007879	11.8711
transcript:ENSBTAT00000044310	11.8776
transcript:ENSBTAT00000047929	11.8808
transcript:ENSBTAT00000064656	11.8855
transcript:ENSBTAT00000056317	11.8947
transcript:ENSBTAT00000026785	11.8967
transcript:ENSBTAT00000045129	11.9105
transcript:ENSBTAT00000019321	11.9343
transcript:ENSBTAT00000047533	11.9457
transcript:ENSBTAT00000004411	11.9469
transcript:ENSBTAT00000027570	11.9513
transcript:ENSBTAT00000002375	11.9528
transcript:ENSBTAT00000020642	11.9656
transcript:ENSBTAT00000003033	11.9689
transcript:ENSBTAT00000023393	11.9703
transcript:ENSBTAT00000027302	11.9722
transcript:ENSBTAT00000020285	11.9777
transcript:ENSBTAT00000021257	11.9973
transcript:ENSBTAT00000014245	12.0017
transcript:ENSBTAT00000012242	12.0137
transcript:ENSBTAT00000004641	12.0239
transcript:ENSBTAT00000013482	12.0392
transcript:ENSBTAT00000063592	12.0411
transcript:ENSBTAT00000039272	12.0414
transcript:ENSBTAT00000007339	12.0424
transcript:ENSBTAT00000002822	12.0462
transcript:ENSBTAT00000014410	12.0485
transcript:ENSBTAT00000021447	12.0565
transcript:ENSBTAT00000016565	12.066
transcript:ENSBTAT00000000756	12.0701
transcript:ENSBTAT00000006955	12.0759
transcript:ENSBTAT00000022249	12.0775
transcript:ENSBTAT00000005656	12.0813
transcript:ENSBTAT00000023455	12.0817
transcript:ENSBTAT00000013862	12.0838
transcript:ENSBTAT00000031869	12.0968
transcript:ENSBTAT00000023757	12.0985
transcript:ENSBTAT00000020170	12.1022
transcript:ENSBTAT00000020024	12.1056
transcript:ENSBTAT00000044700	12.1107
transcript:ENSBTAT00000007578	12.1164
transcript:ENSBTAT00000055936	12.1239
transcript:ENSBTAT00000028522	12.1263
transcript:ENSBTAT00000056154	12.1445
transcript:ENSBTAT00000025179	12.1482
transcript:ENSBTAT00000006409	12.1504
transcript:ENSBTAT00000017628	12.1544
transcript:ENSBTAT00000016159	12.1739
transcript:ENSBTAT00000024046	12.1741
transcript:ENSBTAT00000001040	12.1787
transcript:ENSBTAT00000020699	12.1847
transcript:ENSBTAT00000025996	12.1954
transcript:ENSBTAT00000027434	12.1979
transcript:ENSBTAT00000017164	12.2015
transcript:ENSBTAT00000009708	12.2063
transcript:ENSBTAT00000016882	12.2135
transcript:ENSBTAT00000016883	12.2135
transcript:ENSBTAT00000015301	12.2169
transcript:ENSBTAT00000008501	12.2194
transcript:ENSBTAT00000001923	12.2256
transcript:ENSBTAT00000066170	12.2269
transcript:ENSBTAT00000056942	12.2354
transcript:ENSBTAT00000005226	12.242
transcript:ENSBTAT00000020433	12.2521
transcript:ENSBTAT00000019921	12.2533
transcript:ENSBTAT00000040023	12.2542
transcript:ENSBTAT00000064299	12.2542
transcript:ENSBTAT00000064915	12.2556
transcript:ENSBTAT00000001772	12.2613
transcript:ENSBTAT00000002865	12.2729
transcript:ENSBTAT00000045810	12.2733
transcript:ENSBTAT00000007892	12.2864
transcript:ENSBTAT00000009469	12.2907
transcript:ENSBTAT00000054347	12.2939
transcript:ENSBTAT00000020985	12.3036
transcript:ENSBTAT00000049347	12.3134
transcript:ENSBTAT00000020895	12.3189
transcript:ENSBTAT00000023461	12.3218
transcript:ENSBTAT00000019271	12.326
transcript:ENSBTAT00000028271	12.3409
transcript:ENSBTAT00000063242	12.3468
transcript:ENSBTAT00000025717	12.3525
transcript:ENSBTAT00000011382	12.3546
transcript:ENSBTAT00000010275	12.3598
transcript:ENSBTAT00000061562	12.3612
transcript:ENSBTAT00000008383	12.365
transcript:ENSBTAT00000001467	12.3705
transcript:ENSBTAT00000020586	12.374
transcript:ENSBTAT00000063079	12.3766
transcript:ENSBTAT00000015049	12.3792
transcript:ENSBTAT00000012993	12.3792
transcript:ENSBTAT00000023681	12.3939
transcript:ENSBTAT00000027768	12.3997
transcript:ENSBTAT00000018453	12.4045
transcript:ENSBTAT00000039221	12.412
transcript:ENSBTAT00000015433	12.416
transcript:ENSBTAT00000000741	12.4201
transcript:ENSBTAT00000025063	12.4276
transcript:ENSBTAT00000016237	12.4318
transcript:ENSBTAT00000015555	12.434
transcript:ENSBTAT00000030039	12.4433
transcript:ENSBTAT00000028542	12.4444
transcript:ENSBTAT00000017739	12.4491
transcript:ENSBTAT00000039389	12.4491
transcript:ENSBTAT00000065055	12.4575
transcript:ENSBTAT00000029526	12.4728
transcript:ENSBTAT00000008891	12.475
transcript:ENSBTAT00000022053	12.4795
transcript:ENSBTAT00000023117	12.4818
transcript:ENSBTAT00000018213	12.4943
transcript:ENSBTAT00000009807	12.497
transcript:ENSBTAT00000043179	12.5009
transcript:ENSBTAT00000052221	12.5122
transcript:ENSBTAT00000016955	12.5169
transcript:ENSBTAT00000007461	12.5194
transcript:ENSBTAT00000005983	12.5265
transcript:ENSBTAT00000006791	12.5289
transcript:ENSBTAT00000000461	12.5324
transcript:ENSBTAT00000004667	12.534
transcript:ENSBTAT00000003297	12.5347
transcript:ENSBTAT00000013818	12.5348
transcript:ENSBTAT00000017965	12.5468
transcript:ENSBTAT00000008234	12.5711
transcript:ENSBTAT00000000855	12.5754
transcript:ENSBTAT00000001378	12.5775
transcript:ENSBTAT00000063316	12.5803
transcript:ENSBTAT00000063348	12.6086
transcript:ENSBTAT00000061345	12.6119
transcript:ENSBTAT00000008680	12.6344
transcript:ENSBTAT00000005537	12.6353
transcript:ENSBTAT00000016893	12.6355
transcript:ENSBTAT00000016108	12.6361
transcript:ENSBTAT00000007057	12.6366
transcript:ENSBTAT00000013065	12.6409
transcript:ENSBTAT00000008652	12.6429
transcript:ENSBTAT00000063112	12.664
transcript:ENSBTAT00000008325	12.6647
transcript:ENSBTAT00000044388	12.6653
transcript:ENSBTAT00000008544	12.6889
transcript:ENSBTAT00000061625	12.6956
transcript:ENSBTAT00000009860	12.7043
transcript:ENSBTAT00000054188	12.7093
transcript:ENSBTAT00000022238	12.7116
transcript:ENSBTAT00000065036	12.7138
transcript:ENSBTAT00000024095	12.7157
transcript:ENSBTAT00000063128	12.718
transcript:ENSBTAT00000024796	12.718
transcript:ENSBTAT00000013428	12.7181
transcript:ENSBTAT00000008722	12.7206
transcript:ENSBTAT00000025148	12.7301
transcript:ENSBTAT00000065665	12.738
transcript:ENSBTAT00000066112	12.7401
transcript:ENSBTAT00000006245	12.7439
transcript:ENSBTAT00000022029	12.7489
transcript:ENSBTAT00000021762	12.7489
transcript:ENSBTAT00000033567	12.766
transcript:ENSBTAT00000065857	12.766
transcript:ENSBTAT00000001452	12.7916
transcript:ENSBTAT00000026537	12.795
transcript:ENSBTAT00000002240	12.8118
transcript:ENSBTAT00000011716	12.8278
transcript:ENSBTAT00000029455	12.8346
transcript:ENSBTAT00000004515	12.8368
transcript:ENSBTAT00000020032	12.8375
transcript:ENSBTAT00000020277	12.8422
transcript:ENSBTAT00000009273	12.8477
transcript:ENSBTAT00000053024	12.8567
transcript:ENSBTAT00000026100	12.8608
transcript:ENSBTAT00000016368	12.888
transcript:ENSBTAT00000006075	12.8944
transcript:ENSBTAT00000008931	12.9162
transcript:ENSBTAT00000007043	12.9222
transcript:ENSBTAT00000023668	12.9349
transcript:ENSBTAT00000055417	12.9429
transcript:ENSBTAT00000028236	12.9481
transcript:ENSBTAT00000038048	12.9529
transcript:ENSBTAT00000020511	12.9538
transcript:ENSBTAT00000048680	12.9689
transcript:ENSBTAT00000030481	12.97
transcript:ENSBTAT00000020809	12.9711
transcript:ENSBTAT00000021879	12.9806
transcript:ENSBTAT00000027618	12.9836
transcript:ENSBTAT00000001069	12.9888
transcript:ENSBTAT00000025697	12.9931
transcript:ENSBTAT00000021587	13.0119
transcript:ENSBTAT00000031920	13.0138
transcript:ENSBTAT00000017588	13.0156
transcript:ENSBTAT00000037373	13.0167
transcript:ENSBTAT00000028333	13.0173
transcript:ENSBTAT00000011214	13.0193
transcript:ENSBTAT00000002448	13.0211
transcript:ENSBTAT00000015778	13.0333
transcript:ENSBTAT00000027732	13.0382
transcript:ENSBTAT00000061545	13.0426
transcript:ENSBTAT00000002882	13.0442
transcript:ENSBTAT00000042894	13.0507
transcript:ENSBTAT00000011679	13.0563
transcript:ENSBTAT00000061185	13.0599
transcript:ENSBTAT00000003178	13.0603
transcript:ENSBTAT00000019198	13.0607
transcript:ENSBTAT00000063911	13.08
transcript:ENSBTAT00000020849	13.0833
transcript:ENSBTAT00000004265	13.0846
transcript:ENSBTAT00000003404	13.0935
transcript:ENSBTAT00000008380	13.0965
transcript:ENSBTAT00000036459	13.1017
transcript:ENSBTAT00000018802	13.1059
transcript:ENSBTAT00000023734	13.1077
transcript:ENSBTAT00000000081	13.1094
transcript:ENSBTAT00000012497	13.1126
transcript:ENSBTAT00000022987	13.1141
transcript:ENSBTAT00000045200	13.1143
transcript:ENSBTAT00000043431	13.1209
transcript:ENSBTAT00000063610	13.1274
transcript:ENSBTAT00000056150	13.1303
transcript:ENSBTAT00000011022	13.1324
transcript:ENSBTAT00000014062	13.1375
transcript:ENSBTAT00000009939	13.1419
transcript:ENSBTAT00000002068	13.1453
transcript:ENSBTAT00000039803	13.147
transcript:ENSBTAT00000009497	13.1495
transcript:ENSBTAT00000000211	13.1552
transcript:ENSBTAT00000000568	13.16
transcript:ENSBTAT00000018242	13.1627
transcript:ENSBTAT00000052289	13.1653
transcript:ENSBTAT00000011978	13.1822
transcript:ENSBTAT00000002680	13.1833
transcript:ENSBTAT00000000842	13.1837
transcript:ENSBTAT00000044234	13.191
transcript:ENSBTAT00000061186	13.206
transcript:ENSBTAT00000043139	13.2233
transcript:ENSBTAT00000013885	13.2295
transcript:ENSBTAT00000019284	13.2302
transcript:ENSBTAT00000012175	13.2422
transcript:ENSBTAT00000012167	13.2528
transcript:ENSBTAT00000016002	13.2605
transcript:ENSBTAT00000024472	13.2631
transcript:ENSBTAT00000025071	13.2652
transcript:ENSBTAT00000015084	13.2675
transcript:ENSBTAT00000000891	13.2683
transcript:ENSBTAT00000019893	13.2695
transcript:ENSBTAT00000037418	13.2835
transcript:ENSBTAT00000013158	13.2836
transcript:ENSBTAT00000002395	13.2876
transcript:ENSBTAT00000006464	13.2882
transcript:ENSBTAT00000063391	13.2902
transcript:ENSBTAT00000003585	13.3054
transcript:ENSBTAT00000028663	13.3089
transcript:ENSBTAT00000016495	13.3097
transcript:ENSBTAT00000043637	13.3133
transcript:ENSBTAT00000044812	13.3255
transcript:ENSBTAT00000043544	13.327
transcript:ENSBTAT00000023167	13.328
transcript:ENSBTAT00000022932	13.3439
transcript:ENSBTAT00000051911	13.351
transcript:ENSBTAT00000024318	13.353
transcript:ENSBTAT00000022295	13.3584
transcript:ENSBTAT00000006249	13.3676
transcript:ENSBTAT00000002289	13.3687
transcript:ENSBTAT00000007326	13.3739
transcript:ENSBTAT00000065622	13.3751
transcript:ENSBTAT00000049353	13.3753
transcript:ENSBTAT00000015756	13.3791
transcript:ENSBTAT00000028783	13.3816
transcript:ENSBTAT00000012350	13.3961
transcript:ENSBTAT00000064099	13.3975
transcript:ENSBTAT00000004276	13.4088
transcript:ENSBTAT00000009467	13.4112
transcript:ENSBTAT00000021488	13.4157
transcript:ENSBTAT00000019288	13.4368
transcript:ENSBTAT00000005681	13.4421
transcript:ENSBTAT00000066049	13.4628
transcript:ENSBTAT00000013719	13.4653
transcript:ENSBTAT00000015684	13.4746
transcript:ENSBTAT00000056174	13.5021
transcript:ENSBTAT00000029375	13.5079
transcript:ENSBTAT00000028564	13.5092
transcript:ENSBTAT00000020418	13.5108
transcript:ENSBTAT00000019270	13.5118
transcript:ENSBTAT00000034509	13.5152
transcript:ENSBTAT00000028669	13.5222
transcript:ENSBTAT00000019656	13.5304
transcript:ENSBTAT00000001753	13.5417
transcript:ENSBTAT00000031526	13.5602
transcript:ENSBTAT00000024060	13.5655
transcript:ENSBTAT00000022553	13.5686
transcript:ENSBTAT00000014194	13.5743
transcript:ENSBTAT00000001049	13.5769
transcript:ENSBTAT00000010610	13.5802
transcript:ENSBTAT00000062977	13.5802
transcript:ENSBTAT00000002701	13.5871
transcript:ENSBTAT00000056443	13.5936
transcript:ENSBTAT00000020850	13.5948
transcript:ENSBTAT00000006285	13.6062
transcript:ENSBTAT00000025237	13.6146
transcript:ENSBTAT00000011848	13.6194
transcript:ENSBTAT00000027586	13.6274
transcript:ENSBTAT00000037358	13.628
transcript:ENSBTAT00000022073	13.6446
transcript:ENSBTAT00000016009	13.6457
transcript:ENSBTAT00000014709	13.6463
transcript:ENSBTAT00000002011	13.6479
transcript:ENSBTAT00000011923	13.648
transcript:ENSBTAT00000026920	13.6507
transcript:ENSBTAT00000029070	13.653
transcript:ENSBTAT00000004789	13.6567
transcript:ENSBTAT00000036251	13.6567
transcript:ENSBTAT00000008420	13.6771
transcript:ENSBTAT00000064903	13.6771
transcript:ENSBTAT00000042554	13.6778
transcript:ENSBTAT00000063243	13.6778
transcript:ENSBTAT00000002387	13.6842
transcript:ENSBTAT00000003015	13.6912
transcript:ENSBTAT00000015578	13.7234
transcript:ENSBTAT00000046067	13.7241
transcript:ENSBTAT00000027868	13.734
transcript:ENSBTAT00000006412	13.7374
transcript:ENSBTAT00000004683	13.7388
transcript:ENSBTAT00000050784	13.7411
transcript:ENSBTAT00000013017	13.7434
transcript:ENSBTAT00000042716	13.7447
transcript:ENSBTAT00000056138	13.7482
transcript:ENSBTAT00000055962	13.75
transcript:ENSBTAT00000007814	13.7502
transcript:ENSBTAT00000014102	13.7589
transcript:ENSBTAT00000026786	13.7598
transcript:ENSBTAT00000027791	13.7773
transcript:ENSBTAT00000011996	13.7779
transcript:ENSBTAT00000005927	13.7892
transcript:ENSBTAT00000008001	13.7945
transcript:ENSBTAT00000014200	13.8045
transcript:ENSBTAT00000010835	13.8081
transcript:ENSBTAT00000012847	13.8162
transcript:ENSBTAT00000053355	13.8305
transcript:ENSBTAT00000012940	13.8322
transcript:ENSBTAT00000057307	13.8552
transcript:ENSBTAT00000026031	13.8712
transcript:ENSBTAT00000010949	13.8718
transcript:ENSBTAT00000002066	13.8854
transcript:ENSBTAT00000055396	13.8981
transcript:ENSBTAT00000013983	13.9001
transcript:ENSBTAT00000028631	13.9066
transcript:ENSBTAT00000002404	13.9083
transcript:ENSBTAT00000009316	13.9162
transcript:ENSBTAT00000019607	13.9241
transcript:ENSBTAT00000025510	13.9305
transcript:ENSBTAT00000022971	13.932
transcript:ENSBTAT00000044414	13.9353
transcript:ENSBTAT00000005793	13.9367
transcript:ENSBTAT00000016355	13.9439
transcript:ENSBTAT00000018092	13.944
transcript:ENSBTAT00000000348	13.9569
transcript:ENSBTAT00000024762	13.9586
transcript:ENSBTAT00000052087	13.9601
transcript:ENSBTAT00000029618	13.9626
transcript:ENSBTAT00000063472	13.9653
transcript:ENSBTAT00000010553	13.9659
transcript:ENSBTAT00000001356	13.9668
transcript:ENSBTAT00000064517	13.9706
transcript:ENSBTAT00000064224	13.9731
transcript:ENSBTAT00000023834	13.9803
transcript:ENSBTAT00000023078	13.9887
transcript:ENSBTAT00000013616	13.9896
transcript:ENSBTAT00000002909	13.9925
transcript:ENSBTAT00000045966	13.9965
transcript:ENSBTAT00000023287	14.0011
transcript:ENSBTAT00000064484	14.0025
transcript:ENSBTAT00000054682	14.0042
transcript:ENSBTAT00000015077	14.0047
transcript:ENSBTAT00000018136	14.0081
transcript:ENSBTAT00000042598	14.0224
transcript:ENSBTAT00000053028	14.0257
transcript:ENSBTAT00000021080	14.0291
transcript:ENSBTAT00000005113	14.0452
transcript:ENSBTAT00000005153	14.0459
transcript:ENSBTAT00000000793	14.0527
transcript:ENSBTAT00000013362	14.063
transcript:ENSBTAT00000043738	14.0722
transcript:ENSBTAT00000025290	14.0762
transcript:ENSBTAT00000066205	14.0762
transcript:ENSBTAT00000015992	14.0787
transcript:ENSBTAT00000043631	14.0815
transcript:ENSBTAT00000063635	14.0854
transcript:ENSBTAT00000018766	14.0964
transcript:ENSBTAT00000000994	14.1015
transcript:ENSBTAT00000025878	14.1063
transcript:ENSBTAT00000009288	14.1091
transcript:ENSBTAT00000010198	14.1119
transcript:ENSBTAT00000064968	14.12
transcript:ENSBTAT00000065627	14.127
transcript:ENSBTAT00000012170	14.137
transcript:ENSBTAT00000005923	14.1409
transcript:ENSBTAT00000019057	14.1446
transcript:ENSBTAT00000045638	14.1524
transcript:ENSBTAT00000053586	14.1552
transcript:ENSBTAT00000038011	14.1655
transcript:ENSBTAT00000009691	14.1662
transcript:ENSBTAT00000025331	14.1689
transcript:ENSBTAT00000043390	14.1689
transcript:ENSBTAT00000005967	14.1695
transcript:ENSBTAT00000023889	14.2007
transcript:ENSBTAT00000004686	14.2035
transcript:ENSBTAT00000039904	14.2039
transcript:ENSBTAT00000063605	14.2039
transcript:ENSBTAT00000000617	14.2191
transcript:ENSBTAT00000063408	14.2405
transcript:ENSBTAT00000022264	14.2483
transcript:ENSBTAT00000032261	14.2526
transcript:ENSBTAT00000034474	14.2601
transcript:ENSBTAT00000037556	14.2698
transcript:ENSBTAT00000018512	14.2741
transcript:ENSBTAT00000044652	14.2747
transcript:ENSBTAT00000064063	14.2943
transcript:ENSBTAT00000012857	14.2966
transcript:ENSBTAT00000010195	14.2988
transcript:ENSBTAT00000000094	14.3113
transcript:ENSBTAT00000065999	14.3134
transcript:ENSBTAT00000031912	14.3163
transcript:ENSBTAT00000063988	14.3249
transcript:ENSBTAT00000008574	14.3312
transcript:ENSBTAT00000016358	14.3432
transcript:ENSBTAT00000023599	14.3493
transcript:ENSBTAT00000056479	14.3609
transcript:ENSBTAT00000005206	14.3738
transcript:ENSBTAT00000061581	14.3965
transcript:ENSBTAT00000027654	14.4017
transcript:ENSBTAT00000034671	14.4113
transcript:ENSBTAT00000063552	14.4126
transcript:ENSBTAT00000061402	14.4232
transcript:ENSBTAT00000025033	14.4263
transcript:ENSBTAT00000014377	14.428
transcript:ENSBTAT00000001373	14.4293
transcript:ENSBTAT00000029153	14.436
transcript:ENSBTAT00000011453	14.4368
transcript:ENSBTAT00000022527	14.4374
transcript:ENSBTAT00000011330	14.4572
transcript:ENSBTAT00000027395	14.4654
transcript:ENSBTAT00000052163	14.4699
transcript:ENSBTAT00000003052	14.4817
transcript:ENSBTAT00000028175	14.505
transcript:ENSBTAT00000011545	14.5067
transcript:ENSBTAT00000000851	14.5157
transcript:ENSBTAT00000026040	14.5169
transcript:ENSBTAT00000012351	14.5391
transcript:ENSBTAT00000002646	14.5424
transcript:ENSBTAT00000000576	14.5446
transcript:ENSBTAT00000012236	14.5553
transcript:ENSBTAT00000012776	14.5629
transcript:ENSBTAT00000066090	14.5631
transcript:ENSBTAT00000028342	14.5659
transcript:ENSBTAT00000005837	14.5672
transcript:ENSBTAT00000028556	14.5672
transcript:ENSBTAT00000001929	14.5675
transcript:ENSBTAT00000047408	14.5679
transcript:ENSBTAT00000044681	14.5686
transcript:ENSBTAT00000065590	14.5739
transcript:ENSBTAT00000005212	14.5779
transcript:ENSBTAT00000014143	14.5786
transcript:ENSBTAT00000046062	14.5786
transcript:ENSBTAT00000026780	14.5897
transcript:ENSBTAT00000000651	14.5909
transcript:ENSBTAT00000001004	14.6134
transcript:ENSBTAT00000027184	14.6141
transcript:ENSBTAT00000016614	14.6144
transcript:ENSBTAT00000006779	14.6199
transcript:ENSBTAT00000010454	14.6235
transcript:ENSBTAT00000026341	14.6338
transcript:ENSBTAT00000035288	14.6415
transcript:ENSBTAT00000043931	14.6626
transcript:ENSBTAT00000023023	14.6662
transcript:ENSBTAT00000002902	14.6683
transcript:ENSBTAT00000010319	14.6716
transcript:ENSBTAT00000003353	14.6788
transcript:ENSBTAT00000011665	14.6804
transcript:ENSBTAT00000009013	14.6833
transcript:ENSBTAT00000007111	14.6852
transcript:ENSBTAT00000013170	14.6878
transcript:ENSBTAT00000026054	14.6968
transcript:ENSBTAT00000015677	14.7015
transcript:ENSBTAT00000012092	14.7087
transcript:ENSBTAT00000033253	14.7104
transcript:ENSBTAT00000001538	14.715
transcript:ENSBTAT00000007545	14.7158
transcript:ENSBTAT00000026036	14.7228
transcript:ENSBTAT00000004660	14.7304
transcript:ENSBTAT00000043777	14.7316
transcript:ENSBTAT00000016198	14.7333
transcript:ENSBTAT00000015386	14.7428
transcript:ENSBTAT00000056581	14.7463
transcript:ENSBTAT00000006307	14.7576
transcript:ENSBTAT00000010460	14.7633
transcript:ENSBTAT00000021482	14.7652
transcript:ENSBTAT00000007668	14.7701
transcript:ENSBTAT00000010538	14.7741
transcript:ENSBTAT00000065032	14.7755
transcript:ENSBTAT00000063611	14.7938
transcript:ENSBTAT00000039541	14.7982
transcript:ENSBTAT00000049643	14.7987
transcript:ENSBTAT00000064793	14.8155
transcript:ENSBTAT00000003326	14.8183
transcript:ENSBTAT00000007976	14.8208
transcript:ENSBTAT00000006244	14.8212
transcript:ENSBTAT00000028599	14.8224
transcript:ENSBTAT00000005514	14.8329
transcript:ENSBTAT00000013189	14.8348
transcript:ENSBTAT00000009982	14.8351
transcript:ENSBTAT00000047301	14.8356
transcript:ENSBTAT00000016186	14.853
transcript:ENSBTAT00000007743	14.8867
transcript:ENSBTAT00000010276	14.898
transcript:ENSBTAT00000025243	14.9016
transcript:ENSBTAT00000065446	14.9148
transcript:ENSBTAT00000016981	14.9183
transcript:ENSBTAT00000002695	14.9305
transcript:ENSBTAT00000004671	14.9386
transcript:ENSBTAT00000022579	14.9502
transcript:ENSBTAT00000065098	14.9573
transcript:ENSBTAT00000007147	14.9591
transcript:ENSBTAT00000025938	14.9595
transcript:ENSBTAT00000047991	14.9676
transcript:ENSBTAT00000006363	14.9829
transcript:ENSBTAT00000023111	14.9848
transcript:ENSBTAT00000013803	14.9913
transcript:ENSBTAT00000044066	14.9991
transcript:ENSBTAT00000020474	15.0056
transcript:ENSBTAT00000061471	15.0057
transcript:ENSBTAT00000004024	15.0059
transcript:ENSBTAT00000013323	15.006
transcript:ENSBTAT00000048965	15.0097
transcript:ENSBTAT00000015643	15.0138
transcript:ENSBTAT00000025016	15.0221
transcript:ENSBTAT00000009931	15.027
transcript:ENSBTAT00000026006	15.0316
transcript:ENSBTAT00000019445	15.0343
transcript:ENSBTAT00000012852	15.038
transcript:ENSBTAT00000061323	15.038
transcript:ENSBTAT00000021752	15.0462
transcript:ENSBTAT00000008987	15.0505
transcript:ENSBTAT00000009916	15.0666
transcript:ENSBTAT00000017524	15.0762
transcript:ENSBTAT00000013851	15.0812
transcript:ENSBTAT00000019693	15.0825
transcript:ENSBTAT00000012804	15.1002
transcript:ENSBTAT00000056576	15.1138
transcript:ENSBTAT00000021663	15.12
transcript:ENSBTAT00000061369	15.1223
transcript:ENSBTAT00000006455	15.1243
transcript:ENSBTAT00000007328	15.1282
transcript:ENSBTAT00000006035	15.1423
transcript:ENSBTAT00000016949	15.1543
transcript:ENSBTAT00000033365	15.1639
transcript:ENSBTAT00000030211	15.1646
transcript:ENSBTAT00000051969	15.1701
transcript:ENSBTAT00000021081	15.1796
transcript:ENSBTAT00000056673	15.1965
transcript:ENSBTAT00000038460	15.1979
transcript:ENSBTAT00000066105	15.2057
transcript:ENSBTAT00000042893	15.2089
transcript:ENSBTAT00000020913	15.2195
transcript:ENSBTAT00000012405	15.2226
transcript:ENSBTAT00000016048	15.2246
transcript:ENSBTAT00000005747	15.24
transcript:ENSBTAT00000065896	15.2439
transcript:ENSBTAT00000005512	15.2474
transcript:ENSBTAT00000018525	15.2536
transcript:ENSBTAT00000029502	15.2634
transcript:ENSBTAT00000012125	15.2783
transcript:ENSBTAT00000035482	15.2784
transcript:ENSBTAT00000028836	15.2813
transcript:ENSBTAT00000019942	15.2886
transcript:ENSBTAT00000046263	15.2887
transcript:ENSBTAT00000064983	15.29
transcript:ENSBTAT00000012742	15.3072
transcript:ENSBTAT00000064160	15.3088
transcript:ENSBTAT00000026449	15.3136
transcript:ENSBTAT00000027250	15.3222
transcript:ENSBTAT00000044971	15.3243
transcript:ENSBTAT00000043249	15.3265
transcript:ENSBTAT00000026602	15.3279
transcript:ENSBTAT00000015052	15.3313
transcript:ENSBTAT00000053651	15.3313
transcript:ENSBTAT00000003828	15.3424
transcript:ENSBTAT00000025925	15.3442
transcript:ENSBTAT00000063317	15.3451
transcript:ENSBTAT00000002230	15.3453
transcript:ENSBTAT00000004631	15.3517
transcript:ENSBTAT00000013549	15.3584
transcript:ENSBTAT00000006828	15.3692
transcript:ENSBTAT00000043907	15.3715
transcript:ENSBTAT00000027883	15.3724
transcript:ENSBTAT00000023635	15.3762
transcript:ENSBTAT00000018426	15.3786
transcript:ENSBTAT00000044420	15.387
transcript:ENSBTAT00000020765	15.3935
transcript:ENSBTAT00000064409	15.3952
transcript:ENSBTAT00000065459	15.3957
transcript:ENSBTAT00000027199	15.4009
transcript:ENSBTAT00000052503	15.4025
transcript:ENSBTAT00000044598	15.4202
transcript:ENSBTAT00000015167	15.4232
transcript:ENSBTAT00000017408	15.4286
transcript:ENSBTAT00000009602	15.4303
transcript:ENSBTAT00000026175	15.4306
transcript:ENSBTAT00000009832	15.4476
transcript:ENSBTAT00000017188	15.4476
transcript:ENSBTAT00000034273	15.4484
transcript:ENSBTAT00000048744	15.4493
transcript:ENSBTAT00000056961	15.4494
transcript:ENSBTAT00000001130	15.455
transcript:ENSBTAT00000048078	15.4555
transcript:ENSBTAT00000001187	15.4636
transcript:ENSBTAT00000027767	15.466
transcript:ENSBTAT00000028865	15.4678
transcript:ENSBTAT00000001595	15.4692
transcript:ENSBTAT00000038127	15.4725
transcript:ENSBTAT00000055087	15.4762
transcript:ENSBTAT00000013923	15.4766
transcript:ENSBTAT00000027135	15.4838
transcript:ENSBTAT00000029458	15.4882
transcript:ENSBTAT00000005861	15.4897
transcript:ENSBTAT00000024022	15.4904
transcript:ENSBTAT00000003431	15.5184
transcript:ENSBTAT00000023198	15.5206
transcript:ENSBTAT00000030623	15.5243
transcript:ENSBTAT00000027457	15.5288
transcript:ENSBTAT00000027614	15.5332
transcript:ENSBTAT00000056675	15.5417
transcript:ENSBTAT00000020263	15.5501
transcript:ENSBTAT00000021109	15.555
transcript:ENSBTAT00000006069	15.5595
transcript:ENSBTAT00000044280	15.5759
transcript:ENSBTAT00000000517	15.5898
transcript:ENSBTAT00000055714	15.5915
transcript:ENSBTAT00000026738	15.596
transcript:ENSBTAT00000003163	15.5996
transcript:ENSBTAT00000028464	15.6006
transcript:ENSBTAT00000001970	15.6179
transcript:ENSBTAT00000004324	15.6227
transcript:ENSBTAT00000016741	15.6233
transcript:ENSBTAT00000010646	15.6512
transcript:ENSBTAT00000019231	15.654
transcript:ENSBTAT00000014206	15.6589
transcript:ENSBTAT00000024709	15.6659
transcript:ENSBTAT00000065249	15.6735
transcript:ENSBTAT00000061317	15.6735
transcript:ENSBTAT00000022702	15.6737
transcript:ENSBTAT00000029446	15.6782
transcript:ENSBTAT00000044551	15.6792
transcript:ENSBTAT00000022696	15.6835
transcript:ENSBTAT00000016618	15.6896
transcript:ENSBTAT00000056739	15.6935
transcript:ENSBTAT00000011070	15.6943
transcript:ENSBTAT00000013925	15.7056
transcript:ENSBTAT00000009222	15.7122
transcript:ENSBTAT00000065483	15.7179
transcript:ENSBTAT00000043831	15.7228
transcript:ENSBTAT00000004486	15.7261
transcript:ENSBTAT00000043768	15.7309
transcript:ENSBTAT00000056926	15.74
transcript:ENSBTAT00000025485	15.7506
transcript:ENSBTAT00000047515	15.7614
transcript:ENSBTAT00000043198	15.7658
transcript:ENSBTAT00000052198	15.7672
transcript:ENSBTAT00000021803	15.7741
transcript:ENSBTAT00000011569	15.7745
transcript:ENSBTAT00000013795	15.7768
transcript:ENSBTAT00000000513	15.7795
transcript:ENSBTAT00000015567	15.7907
transcript:ENSBTAT00000063490	15.7947
transcript:ENSBTAT00000060992	15.7983
transcript:ENSBTAT00000026881	15.8025
transcript:ENSBTAT00000029023	15.8158
transcript:ENSBTAT00000028258	15.8385
transcript:ENSBTAT00000013992	15.8436
transcript:ENSBTAT00000055672	15.8485
transcript:ENSBTAT00000017672	15.851
transcript:ENSBTAT00000029082	15.8548
transcript:ENSBTAT00000063952	15.8594
transcript:ENSBTAT00000065909	15.8594
transcript:ENSBTAT00000019549	15.8674
transcript:ENSBTAT00000002512	15.8676
transcript:ENSBTAT00000029514	15.8683
transcript:ENSBTAT00000044837	15.874
transcript:ENSBTAT00000007723	15.8783
transcript:ENSBTAT00000061585	15.8821
transcript:ENSBTAT00000013376	15.8883
transcript:ENSBTAT00000042547	15.8939
transcript:ENSBTAT00000037922	15.9029
transcript:ENSBTAT00000019617	15.9131
transcript:ENSBTAT00000035463	15.9138
transcript:ENSBTAT00000012342	15.9201
transcript:ENSBTAT00000003897	15.9237
transcript:ENSBTAT00000014756	15.9273
transcript:ENSBTAT00000008241	15.9405
transcript:ENSBTAT00000001018	15.9418
transcript:ENSBTAT00000012046	15.9422
transcript:ENSBTAT00000010391	15.9454
transcript:ENSBTAT00000040201	15.9475
transcript:ENSBTAT00000000999	15.9522
transcript:ENSBTAT00000016673	15.9603
transcript:ENSBTAT00000006413	15.9677
transcript:ENSBTAT00000065455	15.9703
transcript:ENSBTAT00000042576	15.9767
transcript:ENSBTAT00000063204	15.9769
transcript:ENSBTAT00000007077	15.9788
transcript:ENSBTAT00000021342	16.0019
transcript:ENSBTAT00000005092	16.0164
transcript:ENSBTAT00000039096	16.0204
transcript:ENSBTAT00000044841	16.0252
transcript:ENSBTAT00000048470	16.0281
transcript:ENSBTAT00000006613	16.0336
transcript:ENSBTAT00000008658	16.0348
transcript:ENSBTAT00000012505	16.0349
transcript:ENSBTAT00000006039	16.0408
transcript:ENSBTAT00000004805	16.041
transcript:ENSBTAT00000012060	16.0474
transcript:ENSBTAT00000002247	16.0576
transcript:ENSBTAT00000027101	16.0583
transcript:ENSBTAT00000001893	16.0633
transcript:ENSBTAT00000010022	16.0695
transcript:ENSBTAT00000056229	16.0705
transcript:ENSBTAT00000044620	16.0726
transcript:ENSBTAT00000024779	16.0908
transcript:ENSBTAT00000061093	16.095
transcript:ENSBTAT00000025522	16.095
transcript:ENSBTAT00000019690	16.1014
transcript:ENSBTAT00000004312	16.1079
transcript:ENSBTAT00000017626	16.1278
transcript:ENSBTAT00000054676	16.1339
transcript:ENSBTAT00000011740	16.1383
transcript:ENSBTAT00000021357	16.1523
transcript:ENSBTAT00000010532	16.1544
transcript:ENSBTAT00000027772	16.1564
transcript:ENSBTAT00000033340	16.1654
transcript:ENSBTAT00000026575	16.1668
transcript:ENSBTAT00000017091	16.1679
transcript:ENSBTAT00000005228	16.1715
transcript:ENSBTAT00000019761	16.1732
transcript:ENSBTAT00000019161	16.1747
transcript:ENSBTAT00000047117	16.1756
transcript:ENSBTAT00000063872	16.1865
transcript:ENSBTAT00000012826	16.1991
transcript:ENSBTAT00000026534	16.2155
transcript:ENSBTAT00000008061	16.2178
transcript:ENSBTAT00000064414	16.2208
transcript:ENSBTAT00000016841	16.2345
transcript:ENSBTAT00000025322	16.2408
transcript:ENSBTAT00000017320	16.2447
transcript:ENSBTAT00000029986	16.2522
transcript:ENSBTAT00000006133	16.2532
transcript:ENSBTAT00000016300	16.2559
transcript:ENSBTAT00000043412	16.2654
transcript:ENSBTAT00000015965	16.2673
transcript:ENSBTAT00000002360	16.2678
transcript:ENSBTAT00000010127	16.2727
transcript:ENSBTAT00000010474	16.2814
transcript:ENSBTAT00000009974	16.2882
transcript:ENSBTAT00000065987	16.2945
transcript:ENSBTAT00000054391	16.3072
transcript:ENSBTAT00000020819	16.3082
transcript:ENSBTAT00000015420	16.3162
transcript:ENSBTAT00000002226	16.3283
transcript:ENSBTAT00000016553	16.329
transcript:ENSBTAT00000016665	16.3379
transcript:ENSBTAT00000034821	16.347
transcript:ENSBTAT00000018046	16.3484
transcript:ENSBTAT00000016154	16.3494
transcript:ENSBTAT00000046420	16.3524
transcript:ENSBTAT00000011767	16.353
transcript:ENSBTAT00000011354	16.3543
transcript:ENSBTAT00000027722	16.3666
transcript:ENSBTAT00000048852	16.3758
transcript:ENSBTAT00000016904	16.3865
transcript:ENSBTAT00000048539	16.3939
transcript:ENSBTAT00000040162	16.3981
transcript:ENSBTAT00000013117	16.4018
transcript:ENSBTAT00000012650	16.4029
transcript:ENSBTAT00000009960	16.4082
transcript:ENSBTAT00000027936	16.4083
transcript:ENSBTAT00000000374	16.4092
transcript:ENSBTAT00000013636	16.4337
transcript:ENSBTAT00000022299	16.4339
transcript:ENSBTAT00000052696	16.4539
transcript:ENSBTAT00000045605	16.4577
transcript:ENSBTAT00000014016	16.4593
transcript:ENSBTAT00000018337	16.4598
transcript:ENSBTAT00000002566	16.464
transcript:ENSBTAT00000063614	16.4733
transcript:ENSBTAT00000065216	16.4767
transcript:ENSBTAT00000015917	16.4796
transcript:ENSBTAT00000061310	16.4841
transcript:ENSBTAT00000025198	16.4863
transcript:ENSBTAT00000065057	16.49
transcript:ENSBTAT00000005418	16.4941
transcript:ENSBTAT00000029373	16.501
transcript:ENSBTAT00000003927	16.5028
transcript:ENSBTAT00000000186	16.5059
transcript:ENSBTAT00000037934	16.508
transcript:ENSBTAT00000018076	16.5081
transcript:ENSBTAT00000002844	16.5121
transcript:ENSBTAT00000063218	16.5216
transcript:ENSBTAT00000015000	16.5263
transcript:ENSBTAT00000021209	16.5287
transcript:ENSBTAT00000064737	16.5308
transcript:ENSBTAT00000031583	16.532
transcript:ENSBTAT00000004027	16.534
transcript:ENSBTAT00000044949	16.5354
transcript:ENSBTAT00000017556	16.5494
transcript:ENSBTAT00000024188	16.5536
transcript:ENSBTAT00000028318	16.5567
transcript:ENSBTAT00000030147	16.5655
transcript:ENSBTAT00000021306	16.5656
transcript:ENSBTAT00000022801	16.568
transcript:ENSBTAT00000003640	16.5718
transcript:ENSBTAT00000018336	16.5728
transcript:ENSBTAT00000023874	16.574
transcript:ENSBTAT00000003826	16.5769
transcript:ENSBTAT00000010516	16.5816
transcript:ENSBTAT00000000246	16.5919
transcript:ENSBTAT00000064519	16.6056
transcript:ENSBTAT00000064932	16.6059
transcript:ENSBTAT00000043971	16.6075
transcript:ENSBTAT00000043078	16.6134
transcript:ENSBTAT00000038564	16.6189
transcript:ENSBTAT00000053993	16.6211
transcript:ENSBTAT00000037326	16.6256
transcript:ENSBTAT00000025031	16.6275
transcript:ENSBTAT00000029272	16.6286
transcript:ENSBTAT00000007918	16.631
transcript:ENSBTAT00000015238	16.6447
transcript:ENSBTAT00000012259	16.6484
transcript:ENSBTAT00000015530	16.6506
transcript:ENSBTAT00000002836	16.6574
transcript:ENSBTAT00000021443	16.6638
transcript:ENSBTAT00000043858	16.664
transcript:ENSBTAT00000028950	16.6696
transcript:ENSBTAT00000035550	16.6713
transcript:ENSBTAT00000046199	16.6735
transcript:ENSBTAT00000010714	16.6756
transcript:ENSBTAT00000023937	16.676
transcript:ENSBTAT00000010939	16.6778
transcript:ENSBTAT00000028277	16.6793
transcript:ENSBTAT00000010335	16.6911
transcript:ENSBTAT00000015995	16.7087
transcript:ENSBTAT00000032743	16.7115
transcript:ENSBTAT00000024713	16.7124
transcript:ENSBTAT00000063359	16.7144
transcript:ENSBTAT00000012308	16.7155
transcript:ENSBTAT00000013182	16.718
transcript:ENSBTAT00000005245	16.7199
transcript:ENSBTAT00000064896	16.721
transcript:ENSBTAT00000012662	16.7246
transcript:ENSBTAT00000008101	16.7252
transcript:ENSBTAT00000018143	16.7402
transcript:ENSBTAT00000017663	16.7475
transcript:ENSBTAT00000010907	16.7521
transcript:ENSBTAT00000008914	16.7556
transcript:ENSBTAT00000012602	16.7608
transcript:ENSBTAT00000033398	16.7615
transcript:ENSBTAT00000055788	16.7632
transcript:ENSBTAT00000053940	16.7708
transcript:ENSBTAT00000007642	16.774
transcript:ENSBTAT00000003318	16.7806
transcript:ENSBTAT00000018405	16.7863
transcript:ENSBTAT00000010136	16.791
transcript:ENSBTAT00000065156	16.791
transcript:ENSBTAT00000009661	16.7986
transcript:ENSBTAT00000024902	16.7986
transcript:ENSBTAT00000016726	16.8057
transcript:ENSBTAT00000000962	16.814
transcript:ENSBTAT00000020514	16.8233
transcript:ENSBTAT00000001328	16.8242
transcript:ENSBTAT00000032251	16.8264
transcript:ENSBTAT00000013971	16.8369
transcript:ENSBTAT00000012550	16.851
transcript:ENSBTAT00000018934	16.8597
transcript:ENSBTAT00000035207	16.8668
transcript:ENSBTAT00000018623	16.8747
transcript:ENSBTAT00000024390	16.8864
transcript:ENSBTAT00000024937	16.8892
transcript:ENSBTAT00000017995	16.8961
transcript:ENSBTAT00000043725	16.8987
transcript:ENSBTAT00000002433	16.903
transcript:ENSBTAT00000022701	16.9078
transcript:ENSBTAT00000005367	16.9116
transcript:ENSBTAT00000020114	16.9231
transcript:ENSBTAT00000055067	16.9279
transcript:ENSBTAT00000004645	16.933
transcript:ENSBTAT00000054196	16.9371
transcript:ENSBTAT00000020441	16.9506
transcript:ENSBTAT00000052616	16.9631
transcript:ENSBTAT00000027152	16.9758
transcript:ENSBTAT00000026058	16.976
transcript:ENSBTAT00000004752	16.9769
transcript:ENSBTAT00000054270	16.9971
transcript:ENSBTAT00000027604	17.009
transcript:ENSBTAT00000003502	17.0173
transcript:ENSBTAT00000034126	17.0187
transcript:ENSBTAT00000004327	17.0213
transcript:ENSBTAT00000002268	17.025
transcript:ENSBTAT00000064788	17.0285
transcript:ENSBTAT00000063495	17.0309
transcript:ENSBTAT00000055077	17.031
transcript:ENSBTAT00000006789	17.034
transcript:ENSBTAT00000064761	17.0347
transcript:ENSBTAT00000001327	17.0363
transcript:ENSBTAT00000001329	17.0363
transcript:ENSBTAT00000065632	17.039
transcript:ENSBTAT00000014236	17.0525
transcript:ENSBTAT00000005416	17.0528
transcript:ENSBTAT00000006804	17.0658
transcript:ENSBTAT00000039630	17.0705
transcript:ENSBTAT00000024262	17.0813
transcript:ENSBTAT00000027446	17.0843
transcript:ENSBTAT00000007309	17.0908
transcript:ENSBTAT00000021105	17.0918
transcript:ENSBTAT00000045398	17.0986
transcript:ENSBTAT00000006918	17.099
transcript:ENSBTAT00000029894	17.1015
transcript:ENSBTAT00000025153	17.1066
transcript:ENSBTAT00000021408	17.1129
transcript:ENSBTAT00000035893	17.1152
transcript:ENSBTAT00000003186	17.1408
transcript:ENSBTAT00000019513	17.1455
transcript:ENSBTAT00000039422	17.1558
transcript:ENSBTAT00000021517	17.1628
transcript:ENSBTAT00000007876	17.1658
transcript:ENSBTAT00000003862	17.1679
transcript:ENSBTAT00000012454	17.1809
transcript:ENSBTAT00000055230	17.1828
transcript:ENSBTAT00000003835	17.1861
transcript:ENSBTAT00000026356	17.1988
transcript:ENSBTAT00000028291	17.1998
transcript:ENSBTAT00000065880	17.1998
transcript:ENSBTAT00000066076	17.2033
transcript:ENSBTAT00000011036	17.2047
transcript:ENSBTAT00000014400	17.2123
transcript:ENSBTAT00000016963	17.2148
transcript:ENSBTAT00000054515	17.2165
transcript:ENSBTAT00000027917	17.2178
transcript:ENSBTAT00000045464	17.2214
transcript:ENSBTAT00000038929	17.2293
transcript:ENSBTAT00000038930	17.2293
transcript:ENSBTAT00000019502	17.2324
transcript:ENSBTAT00000024705	17.2391
transcript:ENSBTAT00000065555	17.2524
transcript:ENSBTAT00000014108	17.2561
transcript:ENSBTAT00000002335	17.265
transcript:ENSBTAT00000040283	17.2665
transcript:ENSBTAT00000028899	17.2679
transcript:ENSBTAT00000006513	17.2696
transcript:ENSBTAT00000028964	17.2705
transcript:ENSBTAT00000011840	17.2725
transcript:ENSBTAT00000014986	17.2784
transcript:ENSBTAT00000005757	17.2796
transcript:ENSBTAT00000026029	17.2835
transcript:ENSBTAT00000002084	17.3019
transcript:ENSBTAT00000015750	17.3022
transcript:ENSBTAT00000061147	17.3026
transcript:ENSBTAT00000020468	17.3045
transcript:ENSBTAT00000002182	17.3098
transcript:ENSBTAT00000023179	17.3161
transcript:ENSBTAT00000000447	17.3179
transcript:ENSBTAT00000005522	17.3194
transcript:ENSBTAT00000037047	17.3203
transcript:ENSBTAT00000056582	17.3233
transcript:ENSBTAT00000014258	17.3233
transcript:ENSBTAT00000001888	17.3246
transcript:ENSBTAT00000046212	17.3255
transcript:ENSBTAT00000064158	17.3257
transcript:ENSBTAT00000037101	17.3276
transcript:ENSBTAT00000044703	17.3276
transcript:ENSBTAT00000008635	17.3314
transcript:ENSBTAT00000020600	17.3354
transcript:ENSBTAT00000001417	17.3375
transcript:ENSBTAT00000031857	17.339
transcript:ENSBTAT00000017383	17.3441
transcript:ENSBTAT00000025020	17.3466
transcript:ENSBTAT00000003563	17.3471
transcript:ENSBTAT00000027197	17.3517
transcript:ENSBTAT00000007930	17.3531
transcript:ENSBTAT00000011312	17.3535
transcript:ENSBTAT00000053062	17.355
transcript:ENSBTAT00000053931	17.3623
transcript:ENSBTAT00000004400	17.3634
transcript:ENSBTAT00000061482	17.3733
transcript:ENSBTAT00000027924	17.3744
transcript:ENSBTAT00000024059	17.3901
transcript:ENSBTAT00000054198	17.3996
transcript:ENSBTAT00000013680	17.4086
transcript:ENSBTAT00000006978	17.4149
transcript:ENSBTAT00000066249	17.4205
transcript:ENSBTAT00000052262	17.4237
transcript:ENSBTAT00000013540	17.4315
transcript:ENSBTAT00000000147	17.4323
transcript:ENSBTAT00000010785	17.4382
transcript:ENSBTAT00000045584	17.4401
transcript:ENSBTAT00000009683	17.4464
transcript:ENSBTAT00000065475	17.4543
transcript:ENSBTAT00000018581	17.4647
transcript:ENSBTAT00000043205	17.467
transcript:ENSBTAT00000016586	17.4741
transcript:ENSBTAT00000025061	17.4757
transcript:ENSBTAT00000063425	17.4769
transcript:ENSBTAT00000043110	17.4787
transcript:ENSBTAT00000005697	17.4895
transcript:ENSBTAT00000019193	17.5009
transcript:ENSBTAT00000063707	17.5009
transcript:ENSBTAT00000029107	17.5059
transcript:ENSBTAT00000055460	17.5124
transcript:ENSBTAT00000030227	17.5152
transcript:ENSBTAT00000002720	17.5253
transcript:ENSBTAT00000015810	17.5279
transcript:ENSBTAT00000065903	17.5325
transcript:ENSBTAT00000047018	17.5402
transcript:ENSBTAT00000043989	17.5423
transcript:ENSBTAT00000002451	17.5434
transcript:ENSBTAT00000031989	17.5434
transcript:ENSBTAT00000044780	17.5444
transcript:ENSBTAT00000054614	17.5445
transcript:ENSBTAT00000039925	17.5495
transcript:ENSBTAT00000029059	17.5502
transcript:ENSBTAT00000015608	17.5553
transcript:ENSBTAT00000011319	17.5656
transcript:ENSBTAT00000010617	17.5743
transcript:ENSBTAT00000027260	17.5802
transcript:ENSBTAT00000001405	17.5809
transcript:ENSBTAT00000001642	17.5838
transcript:ENSBTAT00000063132	17.5877
transcript:ENSBTAT00000038236	17.5906
transcript:ENSBTAT00000028643	17.6099
transcript:ENSBTAT00000037205	17.6101
transcript:ENSBTAT00000034913	17.6184
transcript:ENSBTAT00000037648	17.6197
transcript:ENSBTAT00000065894	17.6305
transcript:ENSBTAT00000006372	17.6343
transcript:ENSBTAT00000052307	17.6409
transcript:ENSBTAT00000001950	17.6448
transcript:ENSBTAT00000026846	17.6627
transcript:ENSBTAT00000021243	17.6662
transcript:ENSBTAT00000020909	17.6776
transcript:ENSBTAT00000044505	17.6826
transcript:ENSBTAT00000027443	17.6853
transcript:ENSBTAT00000009984	17.6864
transcript:ENSBTAT00000010386	17.6911
transcript:ENSBTAT00000024647	17.6913
transcript:ENSBTAT00000005111	17.6919
transcript:ENSBTAT00000048500	17.6945
transcript:ENSBTAT00000044947	17.6974
transcript:ENSBTAT00000064827	17.6977
transcript:ENSBTAT00000011267	17.6991
transcript:ENSBTAT00000002587	17.7
transcript:ENSBTAT00000044020	17.7003
transcript:ENSBTAT00000010764	17.7044
transcript:ENSBTAT00000042618	17.7066
transcript:ENSBTAT00000064981	17.7128
transcript:ENSBTAT00000021082	17.7163
transcript:ENSBTAT00000053229	17.7246
transcript:ENSBTAT00000007456	17.7389
transcript:ENSBTAT00000023055	17.7445
transcript:ENSBTAT00000025396	17.7577
transcript:ENSBTAT00000054275	17.7691
transcript:ENSBTAT00000026972	17.7707
transcript:ENSBTAT00000042840	17.7707
transcript:ENSBTAT00000023285	17.776
transcript:ENSBTAT00000036501	17.7807
transcript:ENSBTAT00000026102	17.7891
transcript:ENSBTAT00000023655	17.7903
transcript:ENSBTAT00000028261	17.7983
transcript:ENSBTAT00000027948	17.8005
transcript:ENSBTAT00000020194	17.8015
transcript:ENSBTAT00000007523	17.8034
transcript:ENSBTAT00000020635	17.8045
transcript:ENSBTAT00000036142	17.807
transcript:ENSBTAT00000017416	17.8133
transcript:ENSBTAT00000023470	17.8244
transcript:ENSBTAT00000021429	17.8255
transcript:ENSBTAT00000007556	17.8286
transcript:ENSBTAT00000034094	17.8353
transcript:ENSBTAT00000009093	17.8494
transcript:ENSBTAT00000002293	17.8641
transcript:ENSBTAT00000030485	17.8699
transcript:ENSBTAT00000053995	17.8712
transcript:ENSBTAT00000066084	17.8713
transcript:ENSBTAT00000018435	17.8718
transcript:ENSBTAT00000045935	17.8737
transcript:ENSBTAT00000024663	17.8795
transcript:ENSBTAT00000025631	17.8805
transcript:ENSBTAT00000026635	17.8818
transcript:ENSBTAT00000015654	17.8836
transcript:ENSBTAT00000066095	17.893
transcript:ENSBTAT00000028482	17.8975
transcript:ENSBTAT00000046471	17.8975
transcript:ENSBTAT00000029038	17.9027
transcript:ENSBTAT00000020347	17.9101
transcript:ENSBTAT00000017923	17.9136
transcript:ENSBTAT00000061303	17.9164
transcript:ENSBTAT00000042573	17.9219
transcript:ENSBTAT00000066011	17.9223
transcript:ENSBTAT00000014026	17.9342
transcript:ENSBTAT00000002311	17.9348
transcript:ENSBTAT00000027511	17.9401
transcript:ENSBTAT00000044289	17.9407
transcript:ENSBTAT00000017114	17.9443
transcript:ENSBTAT00000042655	17.9566
transcript:ENSBTAT00000007112	17.9645
transcript:ENSBTAT00000026762	17.9664
transcript:ENSBTAT00000001976	17.9672
transcript:ENSBTAT00000018163	17.9677
transcript:ENSBTAT00000008161	17.9682
transcript:ENSBTAT00000066334	17.9739
transcript:ENSBTAT00000063403	17.9795
transcript:ENSBTAT00000043415	17.9795
transcript:ENSBTAT00000009545	17.9829
transcript:ENSBTAT00000008661	17.9839
transcript:ENSBTAT00000037505	17.9839
transcript:ENSBTAT00000021769	17.9847
transcript:ENSBTAT00000007561	17.985
transcript:ENSBTAT00000064221	17.985
transcript:ENSBTAT00000026577	17.9858
transcript:ENSBTAT00000020310	17.9865
transcript:ENSBTAT00000012307	17.9998
transcript:ENSBTAT00000053303	18.0102
transcript:ENSBTAT00000025505	18.0103
transcript:ENSBTAT00000002979	18.013
transcript:ENSBTAT00000061486	18.0162
transcript:ENSBTAT00000013630	18.0168
transcript:ENSBTAT00000015123	18.0214
transcript:ENSBTAT00000023704	18.0271
transcript:ENSBTAT00000017269	18.0283
transcript:ENSBTAT00000035230	18.0313
transcript:ENSBTAT00000018700	18.0393
transcript:ENSBTAT00000015861	18.0472
transcript:ENSBTAT00000029698	18.0474
transcript:ENSBTAT00000023440	18.0475
transcript:ENSBTAT00000011457	18.0529
transcript:ENSBTAT00000004659	18.0628
transcript:ENSBTAT00000022718	18.0712
transcript:ENSBTAT00000009694	18.0764
transcript:ENSBTAT00000029088	18.0798
transcript:ENSBTAT00000016537	18.0846
transcript:ENSBTAT00000006434	18.0875
transcript:ENSBTAT00000014806	18.0887
transcript:ENSBTAT00000018956	18.0929
transcript:ENSBTAT00000063452	18.0948
transcript:ENSBTAT00000015261	18.0979
transcript:ENSBTAT00000026756	18.102
transcript:ENSBTAT00000056680	18.1026
transcript:ENSBTAT00000011595	18.1034
transcript:ENSBTAT00000009111	18.1121
transcript:ENSBTAT00000009133	18.1121
transcript:ENSBTAT00000020547	18.1129
transcript:ENSBTAT00000015139	18.1138
transcript:ENSBTAT00000018957	18.1176
transcript:ENSBTAT00000001754	18.1238
transcript:ENSBTAT00000013662	18.1276
transcript:ENSBTAT00000065412	18.1366
transcript:ENSBTAT00000012612	18.1448
transcript:ENSBTAT00000044944	18.1456
transcript:ENSBTAT00000022065	18.1505
transcript:ENSBTAT00000039850	18.1624
transcript:ENSBTAT00000037416	18.1712
transcript:ENSBTAT00000007346	18.1736
transcript:ENSBTAT00000004443	18.1802
transcript:ENSBTAT00000024799	18.1849
transcript:ENSBTAT00000007292	18.1856
transcript:ENSBTAT00000017067	18.1856
transcript:ENSBTAT00000043890	18.1858
transcript:ENSBTAT00000026895	18.19
transcript:ENSBTAT00000000445	18.1906
transcript:ENSBTAT00000026945	18.1937
transcript:ENSBTAT00000047769	18.1977
transcript:ENSBTAT00000015852	18.1981
transcript:ENSBTAT00000024371	18.2073
transcript:ENSBTAT00000017069	18.208
transcript:ENSBTAT00000035955	18.2086
transcript:ENSBTAT00000014035	18.2197
transcript:ENSBTAT00000010444	18.2238
transcript:ENSBTAT00000025156	18.2284
transcript:ENSBTAT00000049391	18.2292
transcript:ENSBTAT00000019944	18.2331
transcript:ENSBTAT00000010389	18.244
transcript:ENSBTAT00000011035	18.2478
transcript:ENSBTAT00000065982	18.2517
transcript:ENSBTAT00000022075	18.2577
transcript:ENSBTAT00000006490	18.2628
transcript:ENSBTAT00000061242	18.2647
transcript:ENSBTAT00000047445	18.2691
transcript:ENSBTAT00000008039	18.2691
transcript:ENSBTAT00000017076	18.2797
transcript:ENSBTAT00000012173	18.2829
transcript:ENSBTAT00000019915	18.2877
transcript:ENSBTAT00000026258	18.2923
transcript:ENSBTAT00000011783	18.3042
transcript:ENSBTAT00000008535	18.3044
transcript:ENSBTAT00000002028	18.3147
transcript:ENSBTAT00000037567	18.3168
transcript:ENSBTAT00000011642	18.3196
transcript:ENSBTAT00000010530	18.3217
transcript:ENSBTAT00000054038	18.3293
transcript:ENSBTAT00000001832	18.3326
transcript:ENSBTAT00000016038	18.337
transcript:ENSBTAT00000043714	18.3425
transcript:ENSBTAT00000012475	18.3499
transcript:ENSBTAT00000026064	18.3531
transcript:ENSBTAT00000030501	18.3532
transcript:ENSBTAT00000008193	18.362
transcript:ENSBTAT00000023373	18.3692
transcript:ENSBTAT00000024649	18.3714
transcript:ENSBTAT00000013339	18.3803
transcript:ENSBTAT00000066350	18.3803
transcript:ENSBTAT00000065245	18.3839
transcript:ENSBTAT00000045467	18.3846
transcript:ENSBTAT00000005982	18.3855
transcript:ENSBTAT00000026147	18.387
transcript:ENSBTAT00000053556	18.3897
transcript:ENSBTAT00000004035	18.3997
transcript:ENSBTAT00000034825	18.4006
transcript:ENSBTAT00000023684	18.406
transcript:ENSBTAT00000001086	18.4064
transcript:ENSBTAT00000029882	18.4067
transcript:ENSBTAT00000064051	18.4113
transcript:ENSBTAT00000024557	18.4203
transcript:ENSBTAT00000064992	18.4237
transcript:ENSBTAT00000017713	18.4284
transcript:ENSBTAT00000047031	18.4312
transcript:ENSBTAT00000013544	18.4339
transcript:ENSBTAT00000003860	18.4462
transcript:ENSBTAT00000017174	18.4473
transcript:ENSBTAT00000065612	18.4483
transcript:ENSBTAT00000031941	18.4529
transcript:ENSBTAT00000053059	18.4529
transcript:ENSBTAT00000053943	18.4533
transcript:ENSBTAT00000004595	18.4557
transcript:ENSBTAT00000003999	18.4686
transcript:ENSBTAT00000052375	18.4732
transcript:ENSBTAT00000022485	18.4772
transcript:ENSBTAT00000003805	18.4776
transcript:ENSBTAT00000029084	18.4784
transcript:ENSBTAT00000029086	18.4794
transcript:ENSBTAT00000007177	18.4828
transcript:ENSBTAT00000053693	18.49
transcript:ENSBTAT00000021393	18.4933
transcript:ENSBTAT00000009482	18.4959
transcript:ENSBTAT00000000967	18.4978
transcript:ENSBTAT00000017844	18.5005
transcript:ENSBTAT00000026474	18.5275
transcript:ENSBTAT00000012517	18.5294
transcript:ENSBTAT00000005174	18.5387
transcript:ENSBTAT00000006102	18.5397
transcript:ENSBTAT00000022381	18.5427
transcript:ENSBTAT00000027246	18.5466
transcript:ENSBTAT00000021521	18.5505
transcript:ENSBTAT00000056266	18.5507
transcript:ENSBTAT00000064694	18.5541
transcript:ENSBTAT00000002156	18.5556
transcript:ENSBTAT00000007323	18.558
transcript:ENSBTAT00000022472	18.563
transcript:ENSBTAT00000007840	18.5644
transcript:ENSBTAT00000019896	18.5714
transcript:ENSBTAT00000026283	18.5725
transcript:ENSBTAT00000000341	18.5769
transcript:ENSBTAT00000063113	18.5825
transcript:ENSBTAT00000027212	18.5884
transcript:ENSBTAT00000043215	18.5919
transcript:ENSBTAT00000016887	18.5967
transcript:ENSBTAT00000020559	18.5993
transcript:ENSBTAT00000043613	18.6035
transcript:ENSBTAT00000015911	18.6036
transcript:ENSBTAT00000005137	18.6139
transcript:ENSBTAT00000029923	18.629
transcript:ENSBTAT00000056876	18.6317
transcript:ENSBTAT00000006029	18.6461
transcript:ENSBTAT00000042553	18.6504
transcript:ENSBTAT00000017864	18.6522
transcript:ENSBTAT00000007452	18.6607
transcript:ENSBTAT00000055083	18.668
transcript:ENSBTAT00000009075	18.6682
transcript:ENSBTAT00000001437	18.6709
transcript:ENSBTAT00000021969	18.6787
transcript:ENSBTAT00000028589	18.6897
transcript:ENSBTAT00000018299	18.6939
transcript:ENSBTAT00000064341	18.6939
transcript:ENSBTAT00000045374	18.6963
transcript:ENSBTAT00000004042	18.7113
transcript:ENSBTAT00000022648	18.7187
transcript:ENSBTAT00000025701	18.7219
transcript:ENSBTAT00000033237	18.722
transcript:ENSBTAT00000010879	18.7247
transcript:ENSBTAT00000035343	18.726
transcript:ENSBTAT00000005445	18.7287
transcript:ENSBTAT00000022759	18.7323
transcript:ENSBTAT00000012212	18.7335
transcript:ENSBTAT00000003728	18.7365
transcript:ENSBTAT00000008030	18.7371
transcript:ENSBTAT00000008431	18.7432
transcript:ENSBTAT00000017182	18.7442
transcript:ENSBTAT00000003203	18.7459
transcript:ENSBTAT00000032182	18.75
transcript:ENSBTAT00000054912	18.757
transcript:ENSBTAT00000022386	18.7597
transcript:ENSBTAT00000063363	18.7602
transcript:ENSBTAT00000012256	18.7648
transcript:ENSBTAT00000027322	18.7654
transcript:ENSBTAT00000064587	18.7667
transcript:ENSBTAT00000066117	18.7667
transcript:ENSBTAT00000020075	18.7669
transcript:ENSBTAT00000061194	18.7707
transcript:ENSBTAT00000013922	18.7874
transcript:ENSBTAT00000033975	18.7893
transcript:ENSBTAT00000006575	18.7924
transcript:ENSBTAT00000064182	18.7988
transcript:ENSBTAT00000012605	18.7999
transcript:ENSBTAT00000064860	18.7999
transcript:ENSBTAT00000024404	18.8
transcript:ENSBTAT00000031284	18.8151
transcript:ENSBTAT00000054357	18.8151
transcript:ENSBTAT00000004192	18.8165
transcript:ENSBTAT00000011491	18.8175
transcript:ENSBTAT00000006405	18.8244
transcript:ENSBTAT00000013121	18.8311
transcript:ENSBTAT00000027338	18.8324
[truncated: 12,281 more rows]

## Sheet: Total Cryo
Total in cryo : 12375	Coverage_cryo
transcript:ENSBTAT00000063108	1.96185
transcript:ENSBTAT00000000860	2.2348
transcript:ENSBTAT00000063301	2.2906
transcript:ENSBTAT00000032427	2.32367
transcript:ENSBTAT00000066011	2.36736
transcript:ENSBTAT00000007682	2.36975
transcript:ENSBTAT00000054961	2.69097
transcript:ENSBTAT00000027480	2.69476
transcript:ENSBTAT00000008511	2.71235
transcript:ENSBTAT00000022073	2.75063
transcript:ENSBTAT00000002533	2.80961
transcript:ENSBTAT00000012324	2.81162
transcript:ENSBTAT00000007840	2.86027
transcript:ENSBTAT00000001347	2.99069
transcript:ENSBTAT00000011166	3.00089
transcript:ENSBTAT00000029373	3.31559
transcript:ENSBTAT00000024445	3.38078
transcript:ENSBTAT00000014663	3.44042
transcript:ENSBTAT00000011959	3.55306
transcript:ENSBTAT00000021927	3.7434
transcript:ENSBTAT00000001237	3.77042
transcript:ENSBTAT00000038334	3.92663
transcript:ENSBTAT00000037548	3.95213
transcript:ENSBTAT00000065567	3.95911
transcript:ENSBTAT00000016419	3.96739
transcript:ENSBTAT00000008038	4.05093
transcript:ENSBTAT00000042741	4.10086
transcript:ENSBTAT00000054064	4.10999
transcript:ENSBTAT00000052754	4.12172
transcript:ENSBTAT00000021685	4.14474
transcript:ENSBTAT00000044397	4.16667
transcript:ENSBTAT00000019811	4.1931
transcript:ENSBTAT00000063693	4.1931
transcript:ENSBTAT00000057596	4.23075
transcript:ENSBTAT00000008858	4.2654
transcript:ENSBTAT00000009255	4.28279
transcript:ENSBTAT00000029841	4.32754
transcript:ENSBTAT00000055580	4.34395
transcript:ENSBTAT00000034076	4.37465
transcript:ENSBTAT00000003182	4.57243
transcript:ENSBTAT00000064968	4.61003
transcript:ENSBTAT00000008330	4.63163
transcript:ENSBTAT00000030916	4.66698
transcript:ENSBTAT00000010835	4.67075
transcript:ENSBTAT00000012602	4.67671
transcript:ENSBTAT00000064690	4.69829
transcript:ENSBTAT00000050851	4.7602
transcript:ENSBTAT00000009171	4.79595
transcript:ENSBTAT00000014527	4.83307
transcript:ENSBTAT00000035399	4.84104
transcript:ENSBTAT00000035773	4.84553
transcript:ENSBTAT00000052461	4.90293
transcript:ENSBTAT00000002240	4.91956
transcript:ENSBTAT00000030913	5.02723
transcript:ENSBTAT00000016206	5.03205
transcript:ENSBTAT00000011986	5.10238
transcript:ENSBTAT00000056392	5.14683
transcript:ENSBTAT00000001623	5.1508
transcript:ENSBTAT00000065422	5.17904
transcript:ENSBTAT00000012050	5.21083
transcript:ENSBTAT00000003664	5.23269
transcript:ENSBTAT00000008803	5.26001
transcript:ENSBTAT00000057411	5.31165
transcript:ENSBTAT00000023081	5.31304
transcript:ENSBTAT00000054755	5.33952
transcript:ENSBTAT00000011545	5.4516
transcript:ENSBTAT00000042743	5.45629
transcript:ENSBTAT00000064081	5.50375
transcript:ENSBTAT00000018523	5.53588
transcript:ENSBTAT00000018658	5.5643
transcript:ENSBTAT00000001696	5.57276
transcript:ENSBTAT00000034341	5.598
transcript:ENSBTAT00000055387	5.61289
transcript:ENSBTAT00000022732	5.61917
transcript:ENSBTAT00000038244	5.63354
transcript:ENSBTAT00000052887	5.66243
transcript:ENSBTAT00000024796	5.66275
transcript:ENSBTAT00000006413	5.68724
transcript:ENSBTAT00000015274	5.73442
transcript:ENSBTAT00000066198	5.7554
transcript:ENSBTAT00000038724	5.78562
transcript:ENSBTAT00000024500	5.79962
transcript:ENSBTAT00000024611	5.84949
transcript:ENSBTAT00000016089	5.85438
transcript:ENSBTAT00000001404	5.86447
transcript:ENSBTAT00000007016	5.87184
transcript:ENSBTAT00000039305	5.88328
transcript:ENSBTAT00000047301	5.90836
transcript:ENSBTAT00000003736	5.9098
transcript:ENSBTAT00000065713	5.92483
transcript:ENSBTAT00000000741	5.95999
transcript:ENSBTAT00000026550	5.99921
transcript:ENSBTAT00000017332	5.99957
transcript:ENSBTAT00000050795	6.03394
transcript:ENSBTAT00000003341	6.07836
transcript:ENSBTAT00000009070	6.09947
transcript:ENSBTAT00000014457	6.10617
transcript:ENSBTAT00000063717	6.11247
transcript:ENSBTAT00000019288	6.12193
transcript:ENSBTAT00000044104	6.16504
transcript:ENSBTAT00000023709	6.18454
transcript:ENSBTAT00000065912	6.20709
transcript:ENSBTAT00000025533	6.25159
transcript:ENSBTAT00000024227	6.25778
transcript:ENSBTAT00000010802	6.35622
transcript:ENSBTAT00000028950	6.36797
transcript:ENSBTAT00000060992	6.36911
transcript:ENSBTAT00000054682	6.37317
transcript:ENSBTAT00000027897	6.37495
transcript:ENSBTAT00000015828	6.37877
transcript:ENSBTAT00000036738	6.38503
transcript:ENSBTAT00000003213	6.46572
transcript:ENSBTAT00000019927	6.47594
transcript:ENSBTAT00000002432	6.48611
transcript:ENSBTAT00000063419	6.49898
transcript:ENSBTAT00000028122	6.51111
transcript:ENSBTAT00000033274	6.51732
transcript:ENSBTAT00000016385	6.53254
transcript:ENSBTAT00000015433	6.54206
transcript:ENSBTAT00000024658	6.56817
transcript:ENSBTAT00000000034	6.60466
transcript:ENSBTAT00000010532	6.60889
transcript:ENSBTAT00000020974	6.61145
transcript:ENSBTAT00000010693	6.63593
transcript:ENSBTAT00000002289	6.67282
transcript:ENSBTAT00000026945	6.69277
transcript:ENSBTAT00000008224	6.72772
transcript:ENSBTAT00000017187	6.72864
transcript:ENSBTAT00000063344	6.73303
transcript:ENSBTAT00000006288	6.76036
transcript:ENSBTAT00000003923	6.76862
transcript:ENSBTAT00000066133	6.82003
transcript:ENSBTAT00000028208	6.83761
transcript:ENSBTAT00000021012	6.83761
transcript:ENSBTAT00000064149	6.84979
transcript:ENSBTAT00000066030	6.8817
transcript:ENSBTAT00000034726	6.89345
transcript:ENSBTAT00000009974	6.99669
transcript:ENSBTAT00000063330	7.00126
transcript:ENSBTAT00000054874	7.02912
transcript:ENSBTAT00000009299	7.0463
transcript:ENSBTAT00000026958	7.06017
transcript:ENSBTAT00000025198	7.06431
transcript:ENSBTAT00000025189	7.08177
transcript:ENSBTAT00000014258	7.0966
transcript:ENSBTAT00000006571	7.10128
transcript:ENSBTAT00000010396	7.12082
transcript:ENSBTAT00000066110	7.13004
transcript:ENSBTAT00000029059	7.15904
transcript:ENSBTAT00000037358	7.20012
transcript:ENSBTAT00000026848	7.20379
transcript:ENSBTAT00000064693	7.20919
transcript:ENSBTAT00000003442	7.22461
transcript:ENSBTAT00000031291	7.23673
transcript:ENSBTAT00000006987	7.24765
transcript:ENSBTAT00000064755	7.26683
transcript:ENSBTAT00000045619	7.26924
transcript:ENSBTAT00000043312	7.28066
transcript:ENSBTAT00000053516	7.29017
transcript:ENSBTAT00000004726	7.29234
transcript:ENSBTAT00000016754	7.30629
transcript:ENSBTAT00000022381	7.30794
transcript:ENSBTAT00000056395	7.33333
transcript:ENSBTAT00000064364	7.34344
transcript:ENSBTAT00000011449	7.35564
transcript:ENSBTAT00000020424	7.35947
transcript:ENSBTAT00000000422	7.36243
transcript:ENSBTAT00000057179	7.40414
transcript:ENSBTAT00000010281	7.40414
transcript:ENSBTAT00000001962	7.40741
transcript:ENSBTAT00000026362	7.41048
transcript:ENSBTAT00000053586	7.43889
transcript:ENSBTAT00000010322	7.4568
transcript:ENSBTAT00000006804	7.4659
transcript:ENSBTAT00000029311	7.55301
transcript:ENSBTAT00000004967	7.60293
transcript:ENSBTAT00000006428	7.60761
transcript:ENSBTAT00000018719	7.62141
transcript:ENSBTAT00000024541	7.64041
transcript:ENSBTAT00000027457	7.64638
transcript:ENSBTAT00000055962	7.66927
transcript:ENSBTAT00000003930	7.70015
transcript:ENSBTAT00000017982	7.70994
transcript:ENSBTAT00000009383	7.75652
transcript:ENSBTAT00000008081	7.75687
transcript:ENSBTAT00000004398	7.76842
transcript:ENSBTAT00000035230	7.77136
transcript:ENSBTAT00000020475	7.77328
transcript:ENSBTAT00000027181	7.7872
transcript:ENSBTAT00000010654	7.7952
transcript:ENSBTAT00000015995	7.82712
transcript:ENSBTAT00000006753	7.84589
transcript:ENSBTAT00000016505	7.84959
transcript:ENSBTAT00000012768	7.86051
transcript:ENSBTAT00000010372	7.86356
transcript:ENSBTAT00000047039	7.86645
transcript:ENSBTAT00000013145	7.89648
transcript:ENSBTAT00000044620	7.90011
transcript:ENSBTAT00000015910	7.91599
transcript:ENSBTAT00000022753	7.96883
transcript:ENSBTAT00000020028	7.98412
transcript:ENSBTAT00000009516	8.00301
transcript:ENSBTAT00000064483	8.00301
transcript:ENSBTAT00000065632	8.00434
transcript:ENSBTAT00000029618	8.01101
transcript:ENSBTAT00000011255	8.02958
transcript:ENSBTAT00000013088	8.05246
transcript:ENSBTAT00000032010	8.06247
transcript:ENSBTAT00000002984	8.06517
transcript:ENSBTAT00000025850	8.09577
transcript:ENSBTAT00000055916	8.15838
transcript:ENSBTAT00000014195	8.16088
transcript:ENSBTAT00000008001	8.17454
transcript:ENSBTAT00000003590	8.17645
transcript:ENSBTAT00000023618	8.18525
transcript:ENSBTAT00000021257	8.21226
transcript:ENSBTAT00000015383	8.23337
transcript:ENSBTAT00000065044	8.28821
transcript:ENSBTAT00000037194	8.30333
transcript:ENSBTAT00000046169	8.30494
transcript:ENSBTAT00000020233	8.30702
transcript:ENSBTAT00000023384	8.31309
transcript:ENSBTAT00000056352	8.33748
transcript:ENSBTAT00000031583	8.35905
transcript:ENSBTAT00000057307	8.36947
transcript:ENSBTAT00000029212	8.37466
transcript:ENSBTAT00000038449	8.41231
transcript:ENSBTAT00000015852	8.42671
transcript:ENSBTAT00000029830	8.44163
transcript:ENSBTAT00000010385	8.4423
transcript:ENSBTAT00000050191	8.45862
transcript:ENSBTAT00000017819	8.45912
transcript:ENSBTAT00000016227	8.46109
transcript:ENSBTAT00000013594	8.47188
transcript:ENSBTAT00000004901	8.47269
transcript:ENSBTAT00000025637	8.48688
transcript:ENSBTAT00000016348	8.53728
transcript:ENSBTAT00000010617	8.5396
transcript:ENSBTAT00000052163	8.54239
transcript:ENSBTAT00000038022	8.54525
transcript:ENSBTAT00000011592	8.56941
transcript:ENSBTAT00000022065	8.58001
transcript:ENSBTAT00000028372	8.58509
transcript:ENSBTAT00000020701	8.60459
transcript:ENSBTAT00000023514	8.6262
transcript:ENSBTAT00000022217	8.62656
transcript:ENSBTAT00000016591	8.62818
transcript:ENSBTAT00000024063	8.63176
transcript:ENSBTAT00000003317	8.65549
transcript:ENSBTAT00000006581	8.66568
transcript:ENSBTAT00000055322	8.66686
transcript:ENSBTAT00000019047	8.66933
transcript:ENSBTAT00000043510	8.71436
transcript:ENSBTAT00000023204	8.72465
transcript:ENSBTAT00000044985	8.73171
transcript:ENSBTAT00000063572	8.73461
transcript:ENSBTAT00000009339	8.74535
transcript:ENSBTAT00000027791	8.748
transcript:ENSBTAT00000056197	8.75093
transcript:ENSBTAT00000003099	8.75467
transcript:ENSBTAT00000010610	8.75682
transcript:ENSBTAT00000062977	8.75682
transcript:ENSBTAT00000054347	8.76119
transcript:ENSBTAT00000045013	8.79519
transcript:ENSBTAT00000015429	8.80687
transcript:ENSBTAT00000065107	8.80881
transcript:ENSBTAT00000043613	8.81348
transcript:ENSBTAT00000021969	8.82446
transcript:ENSBTAT00000030481	8.83577
transcript:ENSBTAT00000005228	8.86824
transcript:ENSBTAT00000018754	8.90089
transcript:ENSBTAT00000000209	8.90647
transcript:ENSBTAT00000009467	8.92427
transcript:ENSBTAT00000000756	8.9554
transcript:ENSBTAT00000028200	8.97021
transcript:ENSBTAT00000022082	8.97602
transcript:ENSBTAT00000014624	8.98988
transcript:ENSBTAT00000004557	9.04253
transcript:ENSBTAT00000000109	9.04662
transcript:ENSBTAT00000035184	9.07462
transcript:ENSBTAT00000000818	9.08664
transcript:ENSBTAT00000038451	9.08664
transcript:ENSBTAT00000020586	9.10939
transcript:ENSBTAT00000046362	9.11337
transcript:ENSBTAT00000038676	9.13462
transcript:ENSBTAT00000065315	9.13607
transcript:ENSBTAT00000046067	9.14262
transcript:ENSBTAT00000025657	9.14878
transcript:ENSBTAT00000034509	9.15152
transcript:ENSBTAT00000053068	9.15808
transcript:ENSBTAT00000002473	9.17183
transcript:ENSBTAT00000055870	9.19232
transcript:ENSBTAT00000005441	9.20345
transcript:ENSBTAT00000029103	9.20973
transcript:ENSBTAT00000048510	9.21412
transcript:ENSBTAT00000065348	9.2221
transcript:ENSBTAT00000019703	9.23068
transcript:ENSBTAT00000006074	9.2326
transcript:ENSBTAT00000064577	9.23777
transcript:ENSBTAT00000014627	9.24901
transcript:ENSBTAT00000028740	9.25088
transcript:ENSBTAT00000025510	9.28465
transcript:ENSBTAT00000006356	9.29149
transcript:ENSBTAT00000026972	9.32776
transcript:ENSBTAT00000042840	9.32776
transcript:ENSBTAT00000064518	9.41984
transcript:ENSBTAT00000010192	9.43513
transcript:ENSBTAT00000019121	9.44812
transcript:ENSBTAT00000043659	9.44913
transcript:ENSBTAT00000019251	9.47977
transcript:ENSBTAT00000002720	9.48483
transcript:ENSBTAT00000014355	9.49786
transcript:ENSBTAT00000014206	9.52877
transcript:ENSBTAT00000025033	9.55663
transcript:ENSBTAT00000024904	9.5568
transcript:ENSBTAT00000056411	9.55744
transcript:ENSBTAT00000016728	9.56392
transcript:ENSBTAT00000064001	9.57869
transcript:ENSBTAT00000009180	9.58517
transcript:ENSBTAT00000007978	9.58543
transcript:ENSBTAT00000005354	9.59218
transcript:ENSBTAT00000025402	9.60505
transcript:ENSBTAT00000046510	9.60841
transcript:ENSBTAT00000013635	9.63081
transcript:ENSBTAT00000054952	9.6392
transcript:ENSBTAT00000022057	9.66354
transcript:ENSBTAT00000027786	9.67927
transcript:ENSBTAT00000017997	9.68228
transcript:ENSBTAT00000028215	9.68911
transcript:ENSBTAT00000001802	9.69728
transcript:ENSBTAT00000008663	9.70626
transcript:ENSBTAT00000009545	9.71116
transcript:ENSBTAT00000026937	9.72256
transcript:ENSBTAT00000020194	9.72577
transcript:ENSBTAT00000014695	9.72583
transcript:ENSBTAT00000015555	9.72843
transcript:ENSBTAT00000007080	9.7352
transcript:ENSBTAT00000021523	9.7432
transcript:ENSBTAT00000004405	9.75137
transcript:ENSBTAT00000027347	9.7629
transcript:ENSBTAT00000025537	9.77932
transcript:ENSBTAT00000002103	9.79609
transcript:ENSBTAT00000023526	9.79696
transcript:ENSBTAT00000027936	9.80474
transcript:ENSBTAT00000002117	9.81549
transcript:ENSBTAT00000001970	9.83149
transcript:ENSBTAT00000037468	9.86026
transcript:ENSBTAT00000064522	9.86395
transcript:ENSBTAT00000026236	9.86665
transcript:ENSBTAT00000012396	9.86742
transcript:ENSBTAT00000006527	9.8685
transcript:ENSBTAT00000065003	9.87124
transcript:ENSBTAT00000048732	9.891
transcript:ENSBTAT00000064628	9.89335
transcript:ENSBTAT00000005562	9.90383
transcript:ENSBTAT00000019309	9.92247
transcript:ENSBTAT00000001538	9.92669
transcript:ENSBTAT00000035482	9.93164
transcript:ENSBTAT00000008696	9.93721
transcript:ENSBTAT00000056355	9.93767
transcript:ENSBTAT00000019499	9.95656
transcript:ENSBTAT00000017509	9.95768
transcript:ENSBTAT00000002084	9.96673
transcript:ENSBTAT00000061585	9.96805
transcript:ENSBTAT00000010214	9.97211
transcript:ENSBTAT00000000115	9.98463
transcript:ENSBTAT00000010393	10.001
transcript:ENSBTAT00000002882	10.0057
transcript:ENSBTAT00000001018	10.0081
transcript:ENSBTAT00000018360	10.0762
transcript:ENSBTAT00000025710	10.0769
transcript:ENSBTAT00000024649	10.1
transcript:ENSBTAT00000057292	10.1067
transcript:ENSBTAT00000047991	10.1101
transcript:ENSBTAT00000012940	10.1114
transcript:ENSBTAT00000030243	10.1136
transcript:ENSBTAT00000024779	10.1145
transcript:ENSBTAT00000005007	10.1277
transcript:ENSBTAT00000004268	10.1346
transcript:ENSBTAT00000016310	10.1401
transcript:ENSBTAT00000021652	10.1469
transcript:ENSBTAT00000056432	10.1711
transcript:ENSBTAT00000016791	10.173
transcript:ENSBTAT00000004230	10.176
transcript:ENSBTAT00000019445	10.1768
transcript:ENSBTAT00000065185	10.1827
transcript:ENSBTAT00000065711	10.1827
transcript:ENSBTAT00000061353	10.1863
transcript:ENSBTAT00000027541	10.192
transcript:ENSBTAT00000002978	10.1925
transcript:ENSBTAT00000012550	10.1968
transcript:ENSBTAT00000045750	10.2145
transcript:ENSBTAT00000033848	10.2152
transcript:ENSBTAT00000001567	10.223
transcript:ENSBTAT00000001744	10.2682
transcript:ENSBTAT00000021584	10.2684
transcript:ENSBTAT00000000612	10.2744
transcript:ENSBTAT00000012232	10.2748
transcript:ENSBTAT00000038247	10.2909
transcript:ENSBTAT00000013451	10.304
transcript:ENSBTAT00000015668	10.3122
transcript:ENSBTAT00000018765	10.3167
transcript:ENSBTAT00000017292	10.3264
transcript:ENSBTAT00000028746	10.3371
transcript:ENSBTAT00000025762	10.3424
transcript:ENSBTAT00000010998	10.379
transcript:ENSBTAT00000004561	10.3818
transcript:ENSBTAT00000028964	10.395
transcript:ENSBTAT00000054910	10.3991
transcript:ENSBTAT00000026336	10.4206
transcript:ENSBTAT00000020809	10.4294
transcript:ENSBTAT00000029148	10.4318
transcript:ENSBTAT00000009263	10.437
transcript:ENSBTAT00000030931	10.4446
transcript:ENSBTAT00000031838	10.4455
transcript:ENSBTAT00000011884	10.4492
transcript:ENSBTAT00000008973	10.4822
transcript:ENSBTAT00000020099	10.4888
transcript:ENSBTAT00000019865	10.4889
transcript:ENSBTAT00000005076	10.4918
transcript:ENSBTAT00000063317	10.4956
transcript:ENSBTAT00000050672	10.5045
transcript:ENSBTAT00000023717	10.5058
transcript:ENSBTAT00000063082	10.5058
transcript:ENSBTAT00000024011	10.5146
transcript:ENSBTAT00000020965	10.5149
transcript:ENSBTAT00000018284	10.5177
transcript:ENSBTAT00000007879	10.5243
transcript:ENSBTAT00000012961	10.5302
transcript:ENSBTAT00000064471	10.5431
transcript:ENSBTAT00000008714	10.5616
transcript:ENSBTAT00000019988	10.5742
transcript:ENSBTAT00000054298	10.585
transcript:ENSBTAT00000013479	10.5897
transcript:ENSBTAT00000019198	10.6206
transcript:ENSBTAT00000052546	10.6443
transcript:ENSBTAT00000003027	10.6631
transcript:ENSBTAT00000057299	10.6662
transcript:ENSBTAT00000063146	10.6911
transcript:ENSBTAT00000065558	10.7042
transcript:ENSBTAT00000046521	10.7198
transcript:ENSBTAT00000065455	10.7242
transcript:ENSBTAT00000054234	10.7288
transcript:ENSBTAT00000002418	10.7342
transcript:ENSBTAT00000010627	10.7432
transcript:ENSBTAT00000015210	10.7662
transcript:ENSBTAT00000004493	10.7822
transcript:ENSBTAT00000026859	10.7946
transcript:ENSBTAT00000001639	10.8262
transcript:ENSBTAT00000002209	10.8264
transcript:ENSBTAT00000036967	10.8311
transcript:ENSBTAT00000065323	10.8466
transcript:ENSBTAT00000027570	10.8556
transcript:ENSBTAT00000001446	10.8599
transcript:ENSBTAT00000016944	10.8648
transcript:ENSBTAT00000020819	10.8781
transcript:ENSBTAT00000054992	10.8877
transcript:ENSBTAT00000017537	10.8916
transcript:ENSBTAT00000034799	10.9029
transcript:ENSBTAT00000027974	10.9153
transcript:ENSBTAT00000003728	10.951
transcript:ENSBTAT00000015137	10.9657
transcript:ENSBTAT00000018327	10.9828
transcript:ENSBTAT00000066055	10.9854
transcript:ENSBTAT00000056672	10.987
transcript:ENSBTAT00000021074	11.0061
transcript:ENSBTAT00000000467	11.0072
transcript:ENSBTAT00000015875	11.0418
transcript:ENSBTAT00000023767	11.0522
transcript:ENSBTAT00000006354	11.0592
transcript:ENSBTAT00000018196	11.0594
transcript:ENSBTAT00000002294	11.0605
transcript:ENSBTAT00000046319	11.0926
transcript:ENSBTAT00000017963	11.0946
transcript:ENSBTAT00000001327	11.0992
transcript:ENSBTAT00000001329	11.0992
transcript:ENSBTAT00000015861	11.1172
transcript:ENSBTAT00000025201	11.1213
transcript:ENSBTAT00000006653	11.1227
transcript:ENSBTAT00000026377	11.1265
transcript:ENSBTAT00000054230	11.129
transcript:ENSBTAT00000004943	11.1338
transcript:ENSBTAT00000035955	11.1373
transcript:ENSBTAT00000065332	11.1458
transcript:ENSBTAT00000063804	11.1561
transcript:ENSBTAT00000063898	11.1648
transcript:ENSBTAT00000010224	11.1787
transcript:ENSBTAT00000001091	11.1888
transcript:ENSBTAT00000022833	11.203
transcript:ENSBTAT00000008602	11.2051
transcript:ENSBTAT00000045854	11.2131
transcript:ENSBTAT00000015822	11.2179
transcript:ENSBTAT00000006409	11.2329
transcript:ENSBTAT00000002165	11.249
transcript:ENSBTAT00000061147	11.26
transcript:ENSBTAT00000034734	11.2723
transcript:ENSBTAT00000022696	11.2872
transcript:ENSBTAT00000020855	11.2879
transcript:ENSBTAT00000025391	11.2891
transcript:ENSBTAT00000056695	11.3005
transcript:ENSBTAT00000057182	11.3244
transcript:ENSBTAT00000017588	11.3283
transcript:ENSBTAT00000016940	11.333
transcript:ENSBTAT00000013481	11.341
transcript:ENSBTAT00000020098	11.3422
transcript:ENSBTAT00000025261	11.3424
transcript:ENSBTAT00000066051	11.362
transcript:ENSBTAT00000009691	11.3664
transcript:ENSBTAT00000042759	11.3704
transcript:ENSBTAT00000055228	11.3774
transcript:ENSBTAT00000006068	11.3858
transcript:ENSBTAT00000021860	11.3865
transcript:ENSBTAT00000020511	11.4274
transcript:ENSBTAT00000046272	11.4609
transcript:ENSBTAT00000062936	11.4609
transcript:ENSBTAT00000019853	11.462
transcript:ENSBTAT00000035550	11.4637
transcript:ENSBTAT00000056138	11.4743
transcript:ENSBTAT00000001351	11.4905
transcript:ENSBTAT00000023118	11.491
transcript:ENSBTAT00000014422	11.5026
transcript:ENSBTAT00000001414	11.5067
transcript:ENSBTAT00000063318	11.507
transcript:ENSBTAT00000007447	11.5073
transcript:ENSBTAT00000004757	11.5093
transcript:ENSBTAT00000002408	11.5223
transcript:ENSBTAT00000003509	11.5238
transcript:ENSBTAT00000064548	11.5242
transcript:ENSBTAT00000018119	11.5635
transcript:ENSBTAT00000052907	11.5792
transcript:ENSBTAT00000049041	11.5876
transcript:ENSBTAT00000022601	11.5987
transcript:ENSBTAT00000024914	11.6197
transcript:ENSBTAT00000012482	11.6295
transcript:ENSBTAT00000050657	11.6324
transcript:ENSBTAT00000010306	11.6329
transcript:ENSBTAT00000022687	11.6351
transcript:ENSBTAT00000036142	11.6511
transcript:ENSBTAT00000025730	11.6537
transcript:ENSBTAT00000057257	11.6537
transcript:ENSBTAT00000020595	11.669
transcript:ENSBTAT00000043020	11.6695
transcript:ENSBTAT00000027314	11.6697
transcript:ENSBTAT00000064389	11.6883
transcript:ENSBTAT00000027554	11.6974
transcript:ENSBTAT00000064414	11.7269
transcript:ENSBTAT00000000851	11.727
transcript:ENSBTAT00000014310	11.7587
transcript:ENSBTAT00000030623	11.7722
transcript:ENSBTAT00000005039	11.7808
transcript:ENSBTAT00000054289	11.7834
transcript:ENSBTAT00000027850	11.7844
transcript:ENSBTAT00000009148	11.795
transcript:ENSBTAT00000027147	11.8006
transcript:ENSBTAT00000015846	11.8052
transcript:ENSBTAT00000061193	11.8087
transcript:ENSBTAT00000027654	11.8095
transcript:ENSBTAT00000002538	11.8192
transcript:ENSBTAT00000053993	11.8294
transcript:ENSBTAT00000049255	11.8489
transcript:ENSBTAT00000008509	11.8493
transcript:ENSBTAT00000002933	11.8545
transcript:ENSBTAT00000022398	11.864
transcript:ENSBTAT00000015938	11.8746
transcript:ENSBTAT00000065682	11.875
transcript:ENSBTAT00000045400	11.8944
transcript:ENSBTAT00000027968	11.8985
transcript:ENSBTAT00000002140	11.9177
transcript:ENSBTAT00000015092	11.9179
transcript:ENSBTAT00000018700	11.9244
transcript:ENSBTAT00000015049	11.9523
transcript:ENSBTAT00000020668	11.9542
transcript:ENSBTAT00000013600	11.9693
transcript:ENSBTAT00000006544	11.9732
transcript:ENSBTAT00000003689	11.9786
transcript:ENSBTAT00000002876	11.9814
transcript:ENSBTAT00000038240	11.9936
transcript:ENSBTAT00000000639	11.9948
transcript:ENSBTAT00000026440	12.0165
transcript:ENSBTAT00000028571	12.0169
transcript:ENSBTAT00000027382	12.0195
transcript:ENSBTAT00000007923	12.0507
transcript:ENSBTAT00000031586	12.0664
transcript:ENSBTAT00000024713	12.0735
transcript:ENSBTAT00000018336	12.0835
transcript:ENSBTAT00000056016	12.105
transcript:ENSBTAT00000001328	12.1097
transcript:ENSBTAT00000005154	12.1131
transcript:ENSBTAT00000045168	12.1147
transcript:ENSBTAT00000035312	12.1212
transcript:ENSBTAT00000003431	12.1271
transcript:ENSBTAT00000057533	12.1285
transcript:ENSBTAT00000009496	12.1576
transcript:ENSBTAT00000001458	12.1707
transcript:ENSBTAT00000014593	12.1834
transcript:ENSBTAT00000004128	12.1853
transcript:ENSBTAT00000031743	12.1932
transcript:ENSBTAT00000045780	12.208
transcript:ENSBTAT00000002583	12.2199
transcript:ENSBTAT00000008609	12.2276
transcript:ENSBTAT00000061140	12.2337
transcript:ENSBTAT00000014267	12.2388
transcript:ENSBTAT00000063592	12.2614
transcript:ENSBTAT00000011569	12.2665
transcript:ENSBTAT00000009807	12.2676
transcript:ENSBTAT00000018617	12.2695
transcript:ENSBTAT00000055826	12.278
transcript:ENSBTAT00000026354	12.2824
transcript:ENSBTAT00000054541	12.2913
transcript:ENSBTAT00000016139	12.2966
transcript:ENSBTAT00000027188	12.3366
transcript:ENSBTAT00000036408	12.3595
transcript:ENSBTAT00000023859	12.3716
transcript:ENSBTAT00000014805	12.4028
transcript:ENSBTAT00000024705	12.4068
transcript:ENSBTAT00000018337	12.423
transcript:ENSBTAT00000015870	12.4263
transcript:ENSBTAT00000012044	12.4263
transcript:ENSBTAT00000032535	12.4336
transcript:ENSBTAT00000015325	12.4408
transcript:ENSBTAT00000001200	12.4494
transcript:ENSBTAT00000046979	12.4516
transcript:ENSBTAT00000031754	12.4863
transcript:ENSBTAT00000019371	12.4868
transcript:ENSBTAT00000026102	12.4891
transcript:ENSBTAT00000021174	12.4989
transcript:ENSBTAT00000022236	12.5
transcript:ENSBTAT00000005861	12.5041
transcript:ENSBTAT00000025246	12.5073
transcript:ENSBTAT00000054154	12.5103
transcript:ENSBTAT00000012928	12.5378
transcript:ENSBTAT00000046043	12.5402
transcript:ENSBTAT00000007217	12.5503
transcript:ENSBTAT00000000356	12.5575
transcript:ENSBTAT00000038217	12.5635
transcript:ENSBTAT00000015345	12.5908
transcript:ENSBTAT00000005411	12.6121
transcript:ENSBTAT00000020559	12.6194
transcript:ENSBTAT00000019992	12.6473
transcript:ENSBTAT00000065413	12.6512
transcript:ENSBTAT00000038502	12.6512
transcript:ENSBTAT00000064073	12.6512
transcript:ENSBTAT00000020055	12.6602
transcript:ENSBTAT00000050396	12.6836
transcript:ENSBTAT00000020989	12.6878
transcript:ENSBTAT00000065275	12.7202
transcript:ENSBTAT00000003214	12.736
transcript:ENSBTAT00000014108	12.7369
transcript:ENSBTAT00000027644	12.7405
transcript:ENSBTAT00000061170	12.7459
transcript:ENSBTAT00000016237	12.749
transcript:ENSBTAT00000011869	12.7517
transcript:ENSBTAT00000026985	12.7564
transcript:ENSBTAT00000045966	12.7608
transcript:ENSBTAT00000004917	12.763
transcript:ENSBTAT00000000573	12.7795
transcript:ENSBTAT00000020985	12.8053
transcript:ENSBTAT00000008658	12.8103
transcript:ENSBTAT00000025435	12.8157
transcript:ENSBTAT00000013230	12.8233
transcript:ENSBTAT00000010706	12.8267
transcript:ENSBTAT00000045265	12.8337
transcript:ENSBTAT00000007288	12.8343
transcript:ENSBTAT00000007965	12.8675
transcript:ENSBTAT00000025522	12.8693
transcript:ENSBTAT00000016647	12.8806
transcript:ENSBTAT00000001720	12.8811
transcript:ENSBTAT00000061367	12.8881
transcript:ENSBTAT00000015039	12.8923
transcript:ENSBTAT00000027875	12.8956
transcript:ENSBTAT00000063682	12.9039
transcript:ENSBTAT00000025374	12.9227
transcript:ENSBTAT00000003210	12.9246
transcript:ENSBTAT00000052111	12.9915
transcript:ENSBTAT00000020395	13.0216
transcript:ENSBTAT00000012592	13.0373
transcript:ENSBTAT00000026055	13.0573
transcript:ENSBTAT00000016807	13.0578
transcript:ENSBTAT00000016799	13.0578
transcript:ENSBTAT00000044856	13.0597
transcript:ENSBTAT00000006383	13.0865
transcript:ENSBTAT00000046575	13.0987
transcript:ENSBTAT00000029167	13.1045
transcript:ENSBTAT00000003239	13.139
transcript:ENSBTAT00000000693	13.1485
transcript:ENSBTAT00000017275	13.1516
transcript:ENSBTAT00000008182	13.1538
transcript:ENSBTAT00000039899	13.1559
transcript:ENSBTAT00000057234	13.1643
transcript:ENSBTAT00000000815	13.1827
transcript:ENSBTAT00000055062	13.19
transcript:ENSBTAT00000009942	13.2022
transcript:ENSBTAT00000015220	13.2071
transcript:ENSBTAT00000038441	13.211
transcript:ENSBTAT00000015933	13.2111
transcript:ENSBTAT00000008625	13.2113
transcript:ENSBTAT00000037858	13.2116
transcript:ENSBTAT00000032713	13.2158
transcript:ENSBTAT00000010315	13.2629
transcript:ENSBTAT00000016841	13.2848
transcript:ENSBTAT00000012640	13.2895
transcript:ENSBTAT00000002325	13.302
transcript:ENSBTAT00000024072	13.3043
transcript:ENSBTAT00000007890	13.3052
transcript:ENSBTAT00000008235	13.331
transcript:ENSBTAT00000048509	13.3456
transcript:ENSBTAT00000015403	13.3501
transcript:ENSBTAT00000016904	13.3549
transcript:ENSBTAT00000010261	13.3567
transcript:ENSBTAT00000020141	13.3761
transcript:ENSBTAT00000063699	13.3832
transcript:ENSBTAT00000037840	13.388
transcript:ENSBTAT00000009150	13.3985
transcript:ENSBTAT00000056565	13.4063
transcript:ENSBTAT00000011024	13.4064
transcript:ENSBTAT00000032953	13.4309
transcript:ENSBTAT00000007304	13.4513
transcript:ENSBTAT00000018594	13.4545
transcript:ENSBTAT00000016943	13.4725
transcript:ENSBTAT00000066224	13.4774
transcript:ENSBTAT00000046199	13.4827
transcript:ENSBTAT00000014005	13.4958
transcript:ENSBTAT00000017105	13.4993
transcript:ENSBTAT00000064833	13.5024
transcript:ENSBTAT00000007927	13.5156
transcript:ENSBTAT00000021742	13.5164
transcript:ENSBTAT00000010530	13.518
transcript:ENSBTAT00000022192	13.5219
transcript:ENSBTAT00000014709	13.5219
transcript:ENSBTAT00000020825	13.5486
transcript:ENSBTAT00000002276	13.556
transcript:ENSBTAT00000020081	13.5576
transcript:ENSBTAT00000008931	13.5647
transcript:ENSBTAT00000020438	13.5692
transcript:ENSBTAT00000016123	13.5729
transcript:ENSBTAT00000007596	13.5791
transcript:ENSBTAT00000035663	13.5871
transcript:ENSBTAT00000013852	13.5884
transcript:ENSBTAT00000002707	13.5959
transcript:ENSBTAT00000016738	13.5984
transcript:ENSBTAT00000061246	13.5984
transcript:ENSBTAT00000043784	13.6073
transcript:ENSBTAT00000004988	13.6103
transcript:ENSBTAT00000010501	13.6111
transcript:ENSBTAT00000019578	13.6191
transcript:ENSBTAT00000035138	13.6206
transcript:ENSBTAT00000043110	13.6334
transcript:ENSBTAT00000020675	13.6388
transcript:ENSBTAT00000054038	13.6397
transcript:ENSBTAT00000023373	13.6409
transcript:ENSBTAT00000035769	13.6477
transcript:ENSBTAT00000007798	13.6595
transcript:ENSBTAT00000008891	13.6901
transcript:ENSBTAT00000019055	13.6986
transcript:ENSBTAT00000008329	13.7046
transcript:ENSBTAT00000000897	13.7231
transcript:ENSBTAT00000018136	13.7317
transcript:ENSBTAT00000007438	13.7374
transcript:ENSBTAT00000020023	13.7806
transcript:ENSBTAT00000044884	13.7823
transcript:ENSBTAT00000003178	13.7966
transcript:ENSBTAT00000052079	13.7967
transcript:ENSBTAT00000065799	13.8076
transcript:ENSBTAT00000002626	13.8096
transcript:ENSBTAT00000017905	13.8389
transcript:ENSBTAT00000011536	13.8439
transcript:ENSBTAT00000062927	13.8507
transcript:ENSBTAT00000000259	13.8515
transcript:ENSBTAT00000064699	13.8814
transcript:ENSBTAT00000061357	13.8857
transcript:ENSBTAT00000003463	13.8914
transcript:ENSBTAT00000023907	13.899
transcript:ENSBTAT00000046263	13.903
transcript:ENSBTAT00000042547	13.9102
transcript:ENSBTAT00000018092	13.9127
transcript:ENSBTAT00000005137	13.9234
transcript:ENSBTAT00000065585	13.927
transcript:ENSBTAT00000056859	13.9487
transcript:ENSBTAT00000028478	13.9545
transcript:ENSBTAT00000017388	13.9786
transcript:ENSBTAT00000018612	14.0067
transcript:ENSBTAT00000026657	14.012
transcript:ENSBTAT00000064452	14.0284
transcript:ENSBTAT00000008644	14.0369
transcript:ENSBTAT00000016856	14.0373
transcript:ENSBTAT00000054266	14.0453
transcript:ENSBTAT00000065541	14.0496
transcript:ENSBTAT00000013697	14.0673
transcript:ENSBTAT00000045347	14.0692
transcript:ENSBTAT00000022485	14.0711
transcript:ENSBTAT00000043910	14.0759
transcript:ENSBTAT00000008060	14.0824
transcript:ENSBTAT00000008557	14.0969
transcript:ENSBTAT00000003400	14.1114
transcript:ENSBTAT00000001762	14.1133
transcript:ENSBTAT00000020304	14.1318
transcript:ENSBTAT00000052262	14.1412
transcript:ENSBTAT00000025492	14.1604
transcript:ENSBTAT00000002518	14.164
transcript:ENSBTAT00000026358	14.1793
transcript:ENSBTAT00000002604	14.1803
transcript:ENSBTAT00000020608	14.1835
transcript:ENSBTAT00000010159	14.2034
transcript:ENSBTAT00000003144	14.2045
transcript:ENSBTAT00000063014	14.2111
transcript:ENSBTAT00000066249	14.218
transcript:ENSBTAT00000008848	14.2185
transcript:ENSBTAT00000017282	14.2194
transcript:ENSBTAT00000004389	14.2213
transcript:ENSBTAT00000024937	14.2342
transcript:ENSBTAT00000011001	14.2357
transcript:ENSBTAT00000002111	14.2373
transcript:ENSBTAT00000026031	14.2385
transcript:ENSBTAT00000008918	14.2435
transcript:ENSBTAT00000021952	14.2604
transcript:ENSBTAT00000011523	14.2822
transcript:ENSBTAT00000015117	14.3025
transcript:ENSBTAT00000032384	14.3055
transcript:ENSBTAT00000006715	14.308
transcript:ENSBTAT00000011594	14.3115
transcript:ENSBTAT00000065671	14.3159
transcript:ENSBTAT00000008386	14.3524
transcript:ENSBTAT00000016893	14.3636
transcript:ENSBTAT00000008447	14.3677
transcript:ENSBTAT00000012691	14.3913
transcript:ENSBTAT00000004267	14.4054
transcript:ENSBTAT00000017531	14.411
transcript:ENSBTAT00000002695	14.414
transcript:ENSBTAT00000019818	14.4146
transcript:ENSBTAT00000028903	14.4264
transcript:ENSBTAT00000005416	14.4516
transcript:ENSBTAT00000001283	14.4539
transcript:ENSBTAT00000000135	14.4732
transcript:ENSBTAT00000007764	14.4798
transcript:ENSBTAT00000017178	14.4867
transcript:ENSBTAT00000029432	14.4892
transcript:ENSBTAT00000019209	14.4946
transcript:ENSBTAT00000013323	14.5082
transcript:ENSBTAT00000001299	14.5145
transcript:ENSBTAT00000027364	14.5155
transcript:ENSBTAT00000038177	14.517
transcript:ENSBTAT00000001782	14.5317
transcript:ENSBTAT00000011978	14.5324
transcript:ENSBTAT00000007339	14.5429
transcript:ENSBTAT00000012977	14.5461
transcript:ENSBTAT00000055374	14.5512
transcript:ENSBTAT00000064000	14.5576
transcript:ENSBTAT00000002529	14.5639
transcript:ENSBTAT00000019239	14.5773
transcript:ENSBTAT00000029895	14.5879
transcript:ENSBTAT00000017095	14.5924
transcript:ENSBTAT00000016929	14.5926
transcript:ENSBTAT00000050815	14.6013
transcript:ENSBTAT00000022290	14.6041
transcript:ENSBTAT00000028958	14.613
transcript:ENSBTAT00000046825	14.616
transcript:ENSBTAT00000020709	14.6178
transcript:ENSBTAT00000032937	14.6192
transcript:ENSBTAT00000064065	14.6193
transcript:ENSBTAT00000011392	14.6249
transcript:ENSBTAT00000064085	14.6272
transcript:ENSBTAT00000017623	14.6368
transcript:ENSBTAT00000019870	14.6401
transcript:ENSBTAT00000026996	14.6402
transcript:ENSBTAT00000038321	14.642
transcript:ENSBTAT00000017865	14.649
transcript:ENSBTAT00000023179	14.6514
transcript:ENSBTAT00000029223	14.6538
transcript:ENSBTAT00000044119	14.6627
transcript:ENSBTAT00000013803	14.6664
transcript:ENSBTAT00000065461	14.6716
transcript:ENSBTAT00000009609	14.6733
transcript:ENSBTAT00000034924	14.6739
transcript:ENSBTAT00000061077	14.6747
transcript:ENSBTAT00000028482	14.6949
transcript:ENSBTAT00000046471	14.6949
transcript:ENSBTAT00000025926	14.7007
transcript:ENSBTAT00000002087	14.7013
transcript:ENSBTAT00000048335	14.7038
transcript:ENSBTAT00000008123	14.7059
transcript:ENSBTAT00000019271	14.7116
transcript:ENSBTAT00000064893	14.7234
transcript:ENSBTAT00000016931	14.7257
transcript:ENSBTAT00000006959	14.7312
transcript:ENSBTAT00000047815	14.7368
transcript:ENSBTAT00000001298	14.7382
transcript:ENSBTAT00000011863	14.7403
transcript:ENSBTAT00000013983	14.7419
transcript:ENSBTAT00000063022	14.7521
transcript:ENSBTAT00000013292	14.7578
transcript:ENSBTAT00000040344	14.7611
transcript:ENSBTAT00000002513	14.7806
transcript:ENSBTAT00000005725	14.7942
transcript:ENSBTAT00000063350	14.7952
transcript:ENSBTAT00000047200	14.8009
transcript:ENSBTAT00000023198	14.8021
transcript:ENSBTAT00000007964	14.8047
transcript:ENSBTAT00000000184	14.8147
transcript:ENSBTAT00000056576	14.8158
transcript:ENSBTAT00000032269	14.8311
transcript:ENSBTAT00000003609	14.8326
transcript:ENSBTAT00000065770	14.8583
transcript:ENSBTAT00000015420	14.8599
transcript:ENSBTAT00000015907	14.864
transcript:ENSBTAT00000025417	14.8702
transcript:ENSBTAT00000008661	14.8822
transcript:ENSBTAT00000037505	14.8822
transcript:ENSBTAT00000028712	14.8892
transcript:ENSBTAT00000014725	14.8959
transcript:ENSBTAT00000020392	14.9055
transcript:ENSBTAT00000019225	14.9219
transcript:ENSBTAT00000033330	14.9269
transcript:ENSBTAT00000000490	14.9591
transcript:ENSBTAT00000052032	14.9682
transcript:ENSBTAT00000024866	14.9701
transcript:ENSBTAT00000020433	14.9735
transcript:ENSBTAT00000043423	14.9782
transcript:ENSBTAT00000043166	14.9892
transcript:ENSBTAT00000012410	14.9899
transcript:ENSBTAT00000045415	15.0065
transcript:ENSBTAT00000025190	15.0101
transcript:ENSBTAT00000011595	15.0126
transcript:ENSBTAT00000056003	15.0205
transcript:ENSBTAT00000027088	15.0254
transcript:ENSBTAT00000033511	15.0294
transcript:ENSBTAT00000039803	15.0376
transcript:ENSBTAT00000065496	15.0495
transcript:ENSBTAT00000036876	15.0576
transcript:ENSBTAT00000023746	15.0678
transcript:ENSBTAT00000003015	15.0784
transcript:ENSBTAT00000053650	15.0824
transcript:ENSBTAT00000011517	15.084
transcript:ENSBTAT00000010516	15.0946
transcript:ENSBTAT00000037734	15.0982
transcript:ENSBTAT00000063324	15.0997
transcript:ENSBTAT00000018961	15.0999
transcript:ENSBTAT00000020468	15.1002
transcript:ENSBTAT00000008501	15.102
transcript:ENSBTAT00000008507	15.1047
transcript:ENSBTAT00000052404	15.1151
transcript:ENSBTAT00000055132	15.1151
transcript:ENSBTAT00000008924	15.1225
transcript:ENSBTAT00000056701	15.1454
transcript:ENSBTAT00000032980	15.1554
transcript:ENSBTAT00000063365	15.1554
transcript:ENSBTAT00000029526	15.1559
transcript:ENSBTAT00000009152	15.1575
transcript:ENSBTAT00000006032	15.158
transcript:ENSBTAT00000022119	15.1637
transcript:ENSBTAT00000052730	15.1709
transcript:ENSBTAT00000006887	15.1734
transcript:ENSBTAT00000023448	15.1798
transcript:ENSBTAT00000030590	15.1881
transcript:ENSBTAT00000007019	15.2023
transcript:ENSBTAT00000002525	15.2041
transcript:ENSBTAT00000042573	15.2068
transcript:ENSBTAT00000002868	15.2305
transcript:ENSBTAT00000001367	15.2362
transcript:ENSBTAT00000034731	15.2375
transcript:ENSBTAT00000017983	15.2421
transcript:ENSBTAT00000020543	15.2436
transcript:ENSBTAT00000063844	15.2667
transcript:ENSBTAT00000009746	15.2707
transcript:ENSBTAT00000052457	15.2918
transcript:ENSBTAT00000008754	15.3003
transcript:ENSBTAT00000020890	15.3086
transcript:ENSBTAT00000015922	15.3173
transcript:ENSBTAT00000003173	15.3203
transcript:ENSBTAT00000063103	15.3236
transcript:ENSBTAT00000043464	15.3268
transcript:ENSBTAT00000027215	15.3333
transcript:ENSBTAT00000000837	15.3424
transcript:ENSBTAT00000002145	15.3459
transcript:ENSBTAT00000053675	15.3551
transcript:ENSBTAT00000030224	15.3603
transcript:ENSBTAT00000013461	15.3769
transcript:ENSBTAT00000044550	15.3817
transcript:ENSBTAT00000015602	15.3846
transcript:ENSBTAT00000016504	15.3899
transcript:ENSBTAT00000004443	15.3915
transcript:ENSBTAT00000021091	15.4026
transcript:ENSBTAT00000036507	15.411
transcript:ENSBTAT00000016586	15.4581
transcript:ENSBTAT00000023700	15.4589
transcript:ENSBTAT00000043872	15.4643
transcript:ENSBTAT00000014397	15.4739
transcript:ENSBTAT00000023499	15.4786
transcript:ENSBTAT00000033455	15.4915
transcript:ENSBTAT00000064834	15.4967
transcript:ENSBTAT00000012029	15.5098
transcript:ENSBTAT00000026386	15.5116
transcript:ENSBTAT00000028564	15.5122
transcript:ENSBTAT00000019507	15.5209
transcript:ENSBTAT00000024709	15.5412
transcript:ENSBTAT00000031148	15.5521
transcript:ENSBTAT00000013855	15.5562
transcript:ENSBTAT00000009709	15.5614
transcript:ENSBTAT00000052366	15.5626
transcript:ENSBTAT00000064426	15.573
transcript:ENSBTAT00000052087	15.5745
transcript:ENSBTAT00000028236	15.5896
transcript:ENSBTAT00000063307	15.5897
transcript:ENSBTAT00000063348	15.5965
transcript:ENSBTAT00000025935	15.5971
transcript:ENSBTAT00000004188	15.6031
transcript:ENSBTAT00000016415	15.6036
transcript:ENSBTAT00000064066	15.614
transcript:ENSBTAT00000015677	15.6244
transcript:ENSBTAT00000032748	15.6354
transcript:ENSBTAT00000063072	15.6379
transcript:ENSBTAT00000064360	15.6379
transcript:ENSBTAT00000026048	15.648
transcript:ENSBTAT00000012770	15.6508
transcript:ENSBTAT00000065821	15.6691
transcript:ENSBTAT00000002335	15.6811
transcript:ENSBTAT00000018897	15.6827
transcript:ENSBTAT00000023089	15.6859
transcript:ENSBTAT00000008416	15.6875
transcript:ENSBTAT00000032947	15.7011
transcript:ENSBTAT00000027969	15.703
transcript:ENSBTAT00000002554	15.7053
transcript:ENSBTAT00000008025	15.7065
transcript:ENSBTAT00000053848	15.7113
transcript:ENSBTAT00000001595	15.7122
transcript:ENSBTAT00000026782	15.7192
transcript:ENSBTAT00000020297	15.7227
transcript:ENSBTAT00000015149	15.7297
transcript:ENSBTAT00000001549	15.7437
transcript:ENSBTAT00000027778	15.745
transcript:ENSBTAT00000013214	15.7528
transcript:ENSBTAT00000063302	15.7592
transcript:ENSBTAT00000023241	15.7697
transcript:ENSBTAT00000029806	15.7748
transcript:ENSBTAT00000042554	15.786
transcript:ENSBTAT00000064048	15.7869
transcript:ENSBTAT00000042747	15.7982
transcript:ENSBTAT00000029514	15.7988
transcript:ENSBTAT00000044837	15.8074
transcript:ENSBTAT00000056091	15.8156
transcript:ENSBTAT00000047510	15.8169
transcript:ENSBTAT00000052566	15.8174
transcript:ENSBTAT00000045473	15.8281
transcript:ENSBTAT00000027652	15.8281
transcript:ENSBTAT00000004184	15.8424
transcript:ENSBTAT00000063139	15.883
transcript:ENSBTAT00000063032	15.883
transcript:ENSBTAT00000020149	15.8838
transcript:ENSBTAT00000022442	15.8958
transcript:ENSBTAT00000044966	15.8958
transcript:ENSBTAT00000043382	15.9154
transcript:ENSBTAT00000021750	15.927
transcript:ENSBTAT00000011004	15.943
transcript:ENSBTAT00000057488	15.9509
transcript:ENSBTAT00000045345	15.9517
transcript:ENSBTAT00000009059	15.9604
transcript:ENSBTAT00000063686	15.9624
transcript:ENSBTAT00000006363	15.9675
transcript:ENSBTAT00000009921	15.9713
transcript:ENSBTAT00000031648	15.9716
transcript:ENSBTAT00000012046	15.9773
transcript:ENSBTAT00000045319	15.9783
transcript:ENSBTAT00000026501	15.9841
transcript:ENSBTAT00000007057	15.9934
transcript:ENSBTAT00000020622	15.9934
transcript:ENSBTAT00000057188	16.0019
transcript:ENSBTAT00000023382	16.0173
transcript:ENSBTAT00000042971	16.0237
transcript:ENSBTAT00000014771	16.0297
transcript:ENSBTAT00000018343	16.0297
transcript:ENSBTAT00000039389	16.0309
transcript:ENSBTAT00000055300	16.0338
transcript:ENSBTAT00000027106	16.0345
transcript:ENSBTAT00000038632	16.0499
transcript:ENSBTAT00000044432	16.0548
transcript:ENSBTAT00000018888	16.0569
transcript:ENSBTAT00000060981	16.0584
transcript:ENSBTAT00000011097	16.0631
transcript:ENSBTAT00000001160	16.0755
transcript:ENSBTAT00000017268	16.0776
transcript:ENSBTAT00000020032	16.0778
transcript:ENSBTAT00000054274	16.0809
transcript:ENSBTAT00000063147	16.0847
transcript:ENSBTAT00000000071	16.1149
transcript:ENSBTAT00000063117	16.1188
transcript:ENSBTAT00000027540	16.13
transcript:ENSBTAT00000017467	16.1324
transcript:ENSBTAT00000002647	16.1359
transcript:ENSBTAT00000026695	16.1359
transcript:ENSBTAT00000065254	16.1359
transcript:ENSBTAT00000026285	16.1451
transcript:ENSBTAT00000029075	16.1607
transcript:ENSBTAT00000004683	16.1632
transcript:ENSBTAT00000003042	16.1741
transcript:ENSBTAT00000064585	16.1807
transcript:ENSBTAT00000027111	16.1813
transcript:ENSBTAT00000018253	16.185
transcript:ENSBTAT00000018261	16.1914
transcript:ENSBTAT00000016019	16.2044
transcript:ENSBTAT00000018812	16.2083
transcript:ENSBTAT00000009392	16.2112
transcript:ENSBTAT00000064473	16.2185
transcript:ENSBTAT00000006419	16.2229
transcript:ENSBTAT00000003981	16.2303
transcript:ENSBTAT00000057406	16.2366
transcript:ENSBTAT00000066136	16.2393
transcript:ENSBTAT00000063604	16.2457
transcript:ENSBTAT00000000329	16.2459
transcript:ENSBTAT00000006464	16.2505
transcript:ENSBTAT00000065590	16.2632
transcript:ENSBTAT00000012797	16.2638
transcript:ENSBTAT00000055714	16.2699
transcript:ENSBTAT00000007133	16.2731
transcript:ENSBTAT00000002260	16.2906
transcript:ENSBTAT00000044882	16.2989
transcript:ENSBTAT00000018807	16.2989
transcript:ENSBTAT00000043432	16.3117
transcript:ENSBTAT00000011760	16.3139
transcript:ENSBTAT00000011049	16.3252
transcript:ENSBTAT00000018600	16.3259
transcript:ENSBTAT00000029320	16.3292
transcript:ENSBTAT00000021003	16.3441
transcript:ENSBTAT00000006710	16.3448
transcript:ENSBTAT00000010748	16.3527
transcript:ENSBTAT00000042557	16.3603
transcript:ENSBTAT00000013636	16.3644
transcript:ENSBTAT00000052633	16.3677
transcript:ENSBTAT00000037753	16.3806
transcript:ENSBTAT00000016048	16.381
transcript:ENSBTAT00000065966	16.3894
transcript:ENSBTAT00000043357	16.3921
transcript:ENSBTAT00000013363	16.3985
transcript:ENSBTAT00000063761	16.4004
transcript:ENSBTAT00000043336	16.4046
transcript:ENSBTAT00000002747	16.4072
transcript:ENSBTAT00000011048	16.4127
transcript:ENSBTAT00000030528	16.4136
transcript:ENSBTAT00000005359	16.4275
transcript:ENSBTAT00000065036	16.4462
transcript:ENSBTAT00000043009	16.4488
transcript:ENSBTAT00000006124	16.4502
transcript:ENSBTAT00000054426	16.4502
transcript:ENSBTAT00000055087	16.4502
transcript:ENSBTAT00000011351	16.4543
transcript:ENSBTAT00000042873	16.4622
transcript:ENSBTAT00000063978	16.468
transcript:ENSBTAT00000047640	16.4709
transcript:ENSBTAT00000009111	16.484
transcript:ENSBTAT00000009133	16.484
transcript:ENSBTAT00000030214	16.4993
transcript:ENSBTAT00000020545	16.5033
transcript:ENSBTAT00000019119	16.5249
transcript:ENSBTAT00000011385	16.5294
transcript:ENSBTAT00000038591	16.5352
transcript:ENSBTAT00000001940	16.5451
transcript:ENSBTAT00000010670	16.5493
transcript:ENSBTAT00000063060	16.5511
transcript:ENSBTAT00000036478	16.5514
transcript:ENSBTAT00000014060	16.5533
transcript:ENSBTAT00000018791	16.556
transcript:ENSBTAT00000006420	16.5615
transcript:ENSBTAT00000015658	16.5646
transcript:ENSBTAT00000009044	16.5792
transcript:ENSBTAT00000044780	16.5839
transcript:ENSBTAT00000005550	16.5841
transcript:ENSBTAT00000030853	16.5846
transcript:ENSBTAT00000055615	16.6117
transcript:ENSBTAT00000023490	16.6124
transcript:ENSBTAT00000013035	16.6198
transcript:ENSBTAT00000007900	16.6239
transcript:ENSBTAT00000065916	16.6302
transcript:ENSBTAT00000002315	16.6431
transcript:ENSBTAT00000007126	16.6512
transcript:ENSBTAT00000056983	16.6536
transcript:ENSBTAT00000043923	16.6667
transcript:ENSBTAT00000003296	16.6667
transcript:ENSBTAT00000031134	16.6683
transcript:ENSBTAT00000047683	16.6791
transcript:ENSBTAT00000056475	16.6835
transcript:ENSBTAT00000000973	16.6837
transcript:ENSBTAT00000015212	16.6848
transcript:ENSBTAT00000025441	16.6956
transcript:ENSBTAT00000057263	16.7222
transcript:ENSBTAT00000050195	16.7287
transcript:ENSBTAT00000052249	16.7309
transcript:ENSBTAT00000026534	16.7325
transcript:ENSBTAT00000006986	16.7557
transcript:ENSBTAT00000029446	16.7793
transcript:ENSBTAT00000025659	16.7864
transcript:ENSBTAT00000023470	16.7911
transcript:ENSBTAT00000007021	16.8062
transcript:ENSBTAT00000013006	16.8094
transcript:ENSBTAT00000002229	16.811
transcript:ENSBTAT00000001854	16.8196
transcript:ENSBTAT00000027172	16.8266
transcript:ENSBTAT00000017773	16.835
transcript:ENSBTAT00000029292	16.8477
transcript:ENSBTAT00000019957	16.8752
transcript:ENSBTAT00000004562	16.8932
transcript:ENSBTAT00000063495	16.8984
transcript:ENSBTAT00000027504	16.9072
transcript:ENSBTAT00000013992	16.9161
transcript:ENSBTAT00000021848	16.9214
transcript:ENSBTAT00000022340	16.9238
transcript:ENSBTAT00000063192	16.9293
transcript:ENSBTAT00000029225	16.9497
transcript:ENSBTAT00000000677	16.9736
transcript:ENSBTAT00000033864	16.9753
transcript:ENSBTAT00000005307	16.9835
transcript:ENSBTAT00000056582	16.9995
transcript:ENSBTAT00000050226	17.0174
transcript:ENSBTAT00000065424	17.0207
transcript:ENSBTAT00000065608	17.0288
transcript:ENSBTAT00000000878	17.033
transcript:ENSBTAT00000014448	17.037
transcript:ENSBTAT00000004547	17.0411
transcript:ENSBTAT00000030920	17.0579
transcript:ENSBTAT00000009612	17.0631
transcript:ENSBTAT00000015645	17.0706
transcript:ENSBTAT00000019893	17.0714
transcript:ENSBTAT00000065896	17.0732
transcript:ENSBTAT00000012125	17.0753
transcript:ENSBTAT00000044328	17.0762
transcript:ENSBTAT00000001080	17.0892
transcript:ENSBTAT00000064677	17.0959
transcript:ENSBTAT00000002508	17.1069
transcript:ENSBTAT00000013436	17.1132
transcript:ENSBTAT00000010156	17.1139
transcript:ENSBTAT00000018428	17.1171
transcript:ENSBTAT00000010124	17.118
transcript:ENSBTAT00000021507	17.1183
transcript:ENSBTAT00000007359	17.1183
transcript:ENSBTAT00000021315	17.1214
transcript:ENSBTAT00000024997	17.1246
transcript:ENSBTAT00000029290	17.1298
transcript:ENSBTAT00000021769	17.1332
transcript:ENSBTAT00000017277	17.134
transcript:ENSBTAT00000018411	17.1373
transcript:ENSBTAT00000017713	17.1421
transcript:ENSBTAT00000023001	17.1445
transcript:ENSBTAT00000018923	17.1463
transcript:ENSBTAT00000064935	17.149
transcript:ENSBTAT00000018013	17.1518
transcript:ENSBTAT00000021082	17.1581
transcript:ENSBTAT00000010738	17.1589
transcript:ENSBTAT00000023213	17.1606
transcript:ENSBTAT00000008088	17.1915
transcript:ENSBTAT00000045063	17.1965
transcript:ENSBTAT00000023596	17.1996
transcript:ENSBTAT00000025932	17.1997
transcript:ENSBTAT00000013858	17.208
transcript:ENSBTAT00000018876	17.2084
transcript:ENSBTAT00000063652	17.2194
transcript:ENSBTAT00000021084	17.2211
transcript:ENSBTAT00000010136	17.2308
transcript:ENSBTAT00000065156	17.2308
transcript:ENSBTAT00000040383	17.2316
transcript:ENSBTAT00000017728	17.2471
transcript:ENSBTAT00000004161	17.2548
transcript:ENSBTAT00000023107	17.2727
transcript:ENSBTAT00000064366	17.284
transcript:ENSBTAT00000015839	17.284
transcript:ENSBTAT00000005943	17.287
transcript:ENSBTAT00000054084	17.2878
transcript:ENSBTAT00000008802	17.2909
transcript:ENSBTAT00000038666	17.2917
transcript:ENSBTAT00000044438	17.2928
transcript:ENSBTAT00000009747	17.293
transcript:ENSBTAT00000012057	17.2982
transcript:ENSBTAT00000025615	17.3059
transcript:ENSBTAT00000001191	17.3102
transcript:ENSBTAT00000027731	17.3153
transcript:ENSBTAT00000065922	17.3252
transcript:ENSBTAT00000009365	17.3307
transcript:ENSBTAT00000010741	17.3364
transcript:ENSBTAT00000033700	17.3488
transcript:ENSBTAT00000004844	17.35
transcript:ENSBTAT00000064277	17.358
transcript:ENSBTAT00000009151	17.3652
transcript:ENSBTAT00000064164	17.366
transcript:ENSBTAT00000016680	17.3726
transcript:ENSBTAT00000008370	17.3885
transcript:ENSBTAT00000013696	17.39
transcript:ENSBTAT00000052627	17.4241
transcript:ENSBTAT00000019468	17.4261
transcript:ENSBTAT00000020101	17.4268
transcript:ENSBTAT00000025667	17.4319
transcript:ENSBTAT00000006632	17.4362
transcript:ENSBTAT00000012833	17.4503
transcript:ENSBTAT00000017420	17.4655
transcript:ENSBTAT00000018189	17.4708
transcript:ENSBTAT00000008473	17.4829
transcript:ENSBTAT00000003523	17.4902
transcript:ENSBTAT00000010259	17.5057
transcript:ENSBTAT00000020847	17.5078
transcript:ENSBTAT00000001564	17.5088
transcript:ENSBTAT00000011371	17.5108
transcript:ENSBTAT00000018773	17.5121
transcript:ENSBTAT00000020955	17.5133
transcript:ENSBTAT00000064996	17.5286
transcript:ENSBTAT00000017120	17.5298
transcript:ENSBTAT00000035290	17.5298
transcript:ENSBTAT00000029131	17.5443
transcript:ENSBTAT00000016055	17.5572
transcript:ENSBTAT00000017746	17.57
transcript:ENSBTAT00000005670	17.5714
transcript:ENSBTAT00000011273	17.5723
transcript:ENSBTAT00000042610	17.5783
transcript:ENSBTAT00000056931	17.5887
transcript:ENSBTAT00000019322	17.5958
transcript:ENSBTAT00000014462	17.6008
transcript:ENSBTAT00000056673	17.6045
transcript:ENSBTAT00000015967	17.6079
transcript:ENSBTAT00000006924	17.6116
transcript:ENSBTAT00000019942	17.618
transcript:ENSBTAT00000049046	17.6223
transcript:ENSBTAT00000026275	17.6314
transcript:ENSBTAT00000064175	17.6344
transcript:ENSBTAT00000057012	17.6346
transcript:ENSBTAT00000053721	17.6425
transcript:ENSBTAT00000061216	17.644
transcript:ENSBTAT00000008944	17.6453
transcript:ENSBTAT00000066259	17.6465
transcript:ENSBTAT00000007095	17.6554
transcript:ENSBTAT00000006622	17.6613
transcript:ENSBTAT00000010723	17.6669
transcript:ENSBTAT00000001386	17.6898
transcript:ENSBTAT00000021312	17.7239
transcript:ENSBTAT00000004324	17.7267
transcript:ENSBTAT00000017523	17.7448
transcript:ENSBTAT00000009056	17.7637
transcript:ENSBTAT00000047094	17.7639
transcript:ENSBTAT00000049934	17.771
transcript:ENSBTAT00000066029	17.771
transcript:ENSBTAT00000053788	17.7791
transcript:ENSBTAT00000005534	17.7841
transcript:ENSBTAT00000008715	17.7849
transcript:ENSBTAT00000064911	17.7897
transcript:ENSBTAT00000011702	17.7903
transcript:ENSBTAT00000029280	17.7925
transcript:ENSBTAT00000004210	17.8079
transcript:ENSBTAT00000028273	17.8186
transcript:ENSBTAT00000053045	17.8253
transcript:ENSBTAT00000026452	17.8273
transcript:ENSBTAT00000027552	17.8273
transcript:ENSBTAT00000063767	17.8404
transcript:ENSBTAT00000003131	17.8475
transcript:ENSBTAT00000056164	17.8483
transcript:ENSBTAT00000002841	17.8512
transcript:ENSBTAT00000049985	17.8545
transcript:ENSBTAT00000013268	17.8609
transcript:ENSBTAT00000020432	17.8641
transcript:ENSBTAT00000043205	17.8707
transcript:ENSBTAT00000029249	17.8707
transcript:ENSBTAT00000002119	17.8746
transcript:ENSBTAT00000018350	17.8813
transcript:ENSBTAT00000011345	17.884
transcript:ENSBTAT00000063136	17.9012
transcript:ENSBTAT00000007153	17.9048
transcript:ENSBTAT00000008096	17.9474
transcript:ENSBTAT00000035789	17.9533
transcript:ENSBTAT00000035874	17.9579
transcript:ENSBTAT00000015389	17.9583
transcript:ENSBTAT00000027841	17.9599
transcript:ENSBTAT00000023277	17.996
transcript:ENSBTAT00000007717	17.9976
transcript:ENSBTAT00000001625	18.0047
transcript:ENSBTAT00000029169	18.0059
transcript:ENSBTAT00000017992	18.0095
transcript:ENSBTAT00000005837	18.0116
transcript:ENSBTAT00000003191	18.0116
transcript:ENSBTAT00000055170	18.0138
transcript:ENSBTAT00000000527	18.0212
transcript:ENSBTAT00000001950	18.0284
transcript:ENSBTAT00000013065	18.0412
transcript:ENSBTAT00000035288	18.0433
transcript:ENSBTAT00000020381	18.0434
transcript:ENSBTAT00000008207	18.0441
transcript:ENSBTAT00000037363	18.0511
transcript:ENSBTAT00000000588	18.0538
transcript:ENSBTAT00000019467	18.0572
transcript:ENSBTAT00000027336	18.058
transcript:ENSBTAT00000060999	18.0607
transcript:ENSBTAT00000015716	18.0681
transcript:ENSBTAT00000023689	18.0862
transcript:ENSBTAT00000011879	18.0952
transcript:ENSBTAT00000054144	18.0961
transcript:ENSBTAT00000039410	18.1057
transcript:ENSBTAT00000003529	18.1072
transcript:ENSBTAT00000007976	18.1156
transcript:ENSBTAT00000000276	18.1272
transcript:ENSBTAT00000018669	18.1301
transcript:ENSBTAT00000026726	18.1328
transcript:ENSBTAT00000044471	18.1369
transcript:ENSBTAT00000009548	18.1414
transcript:ENSBTAT00000020046	18.1455
transcript:ENSBTAT00000009961	18.1513
transcript:ENSBTAT00000044870	18.1601
transcript:ENSBTAT00000002792	18.1612
transcript:ENSBTAT00000027498	18.1638
transcript:ENSBTAT00000029424	18.1643
transcript:ENSBTAT00000061034	18.1855
transcript:ENSBTAT00000001536	18.1905
transcript:ENSBTAT00000001061	18.199
transcript:ENSBTAT00000024729	18.2121
transcript:ENSBTAT00000024378	18.2128
transcript:ENSBTAT00000025832	18.223
transcript:ENSBTAT00000054480	18.2254
transcript:ENSBTAT00000027592	18.2362
transcript:ENSBTAT00000063152	18.2532
transcript:ENSBTAT00000019254	18.2691
transcript:ENSBTAT00000065852	18.2692
transcript:ENSBTAT00000007768	18.2748
transcript:ENSBTAT00000053693	18.2871
transcript:ENSBTAT00000023834	18.2877
transcript:ENSBTAT00000046842	18.2932
transcript:ENSBTAT00000053931	18.3041
transcript:ENSBTAT00000029251	18.3065
transcript:ENSBTAT00000007588	18.3072
transcript:ENSBTAT00000015486	18.3133
transcript:ENSBTAT00000002299	18.314
transcript:ENSBTAT00000024049	18.3176
transcript:ENSBTAT00000005932	18.3331
transcript:ENSBTAT00000017386	18.3333
transcript:ENSBTAT00000018907	18.3625
transcript:ENSBTAT00000027152	18.3626
transcript:ENSBTAT00000015139	18.3843
transcript:ENSBTAT00000054043	18.3871
transcript:ENSBTAT00000023465	18.4038
transcript:ENSBTAT00000017274	18.4078
transcript:ENSBTAT00000029126	18.411
transcript:ENSBTAT00000012342	18.4142
transcript:ENSBTAT00000052906	18.416
transcript:ENSBTAT00000020114	18.4211
transcript:ENSBTAT00000003394	18.4244
transcript:ENSBTAT00000063736	18.4358
transcript:ENSBTAT00000019750	18.4374
transcript:ENSBTAT00000063539	18.4382
transcript:ENSBTAT00000063362	18.4385
transcript:ENSBTAT00000063401	18.4389
transcript:ENSBTAT00000055067	18.4431
transcript:ENSBTAT00000002136	18.4441
transcript:ENSBTAT00000005680	18.451
transcript:ENSBTAT00000012173	18.4556
transcript:ENSBTAT00000044661	18.4563
transcript:ENSBTAT00000027030	18.4738
transcript:ENSBTAT00000062950	18.4993
transcript:ENSBTAT00000065201	18.5082
transcript:ENSBTAT00000047964	18.5185
transcript:ENSBTAT00000026333	18.5191
transcript:ENSBTAT00000061462	18.5302
transcript:ENSBTAT00000064981	18.5312
transcript:ENSBTAT00000005904	18.536
transcript:ENSBTAT00000006112	18.5387
transcript:ENSBTAT00000015231	18.5497
transcript:ENSBTAT00000043431	18.5521
transcript:ENSBTAT00000064827	18.5582
transcript:ENSBTAT00000027793	18.5735
transcript:ENSBTAT00000025675	18.5746
transcript:ENSBTAT00000065517	18.5784
transcript:ENSBTAT00000021623	18.5907
transcript:ENSBTAT00000050635	18.5909
transcript:ENSBTAT00000008851	18.6007
transcript:ENSBTAT00000018114	18.6007
transcript:ENSBTAT00000007792	18.6131
transcript:ENSBTAT00000013482	18.6173
transcript:ENSBTAT00000004806	18.6278
transcript:ENSBTAT00000026567	18.6366
transcript:ENSBTAT00000042815	18.6533
transcript:ENSBTAT00000021630	18.667
transcript:ENSBTAT00000032823	18.6884
transcript:ENSBTAT00000005113	18.695
transcript:ENSBTAT00000064438	18.6962
transcript:ENSBTAT00000053125	18.6971
transcript:ENSBTAT00000063471	18.7017
transcript:ENSBTAT00000060950	18.7024
transcript:ENSBTAT00000014879	18.7076
transcript:ENSBTAT00000020368	18.7085
transcript:ENSBTAT00000061310	18.7087
transcript:ENSBTAT00000032525	18.7135
transcript:ENSBTAT00000029198	18.7165
transcript:ENSBTAT00000038884	18.7172
transcript:ENSBTAT00000042846	18.7184
transcript:ENSBTAT00000016486	18.7271
transcript:ENSBTAT00000023111	18.7447
transcript:ENSBTAT00000012533	18.7473
transcript:ENSBTAT00000029033	18.7563
transcript:ENSBTAT00000001640	18.7578
transcript:ENSBTAT00000010089	18.7596
transcript:ENSBTAT00000066239	18.7688
transcript:ENSBTAT00000027656	18.7706
transcript:ENSBTAT00000029229	18.7726
transcript:ENSBTAT00000007595	18.7849
transcript:ENSBTAT00000006857	18.7857
transcript:ENSBTAT00000026585	18.7923
transcript:ENSBTAT00000011278	18.7984
transcript:ENSBTAT00000065693	18.799
transcript:ENSBTAT00000002838	18.8102
transcript:ENSBTAT00000011313	18.8397
transcript:ENSBTAT00000053012	18.8444
transcript:ENSBTAT00000033676	18.8707
transcript:ENSBTAT00000014891	18.8824
transcript:ENSBTAT00000024873	18.8841
transcript:ENSBTAT00000061380	18.8876
transcript:ENSBTAT00000026403	18.9149
transcript:ENSBTAT00000039551	18.9156
transcript:ENSBTAT00000015924	18.9167
transcript:ENSBTAT00000006962	18.9178
transcript:ENSBTAT00000025031	18.9213
transcript:ENSBTAT00000052204	18.9258
transcript:ENSBTAT00000017976	18.9418
transcript:ENSBTAT00000008771	18.9451
transcript:ENSBTAT00000065720	18.9485
transcript:ENSBTAT00000064340	18.9522
transcript:ENSBTAT00000012726	18.9633
transcript:ENSBTAT00000064587	18.9674
transcript:ENSBTAT00000066117	18.9674
transcript:ENSBTAT00000046186	18.9737
transcript:ENSBTAT00000021634	18.9765
transcript:ENSBTAT00000007129	18.9783
transcript:ENSBTAT00000018029	18.9811
transcript:ENSBTAT00000026729	18.984
transcript:ENSBTAT00000010884	18.9933
transcript:ENSBTAT00000052030	18.9934
transcript:ENSBTAT00000026884	19.0176
transcript:ENSBTAT00000026744	19.0193
transcript:ENSBTAT00000009103	19.0287
transcript:ENSBTAT00000015172	19.0299
transcript:ENSBTAT00000020343	19.0341
transcript:ENSBTAT00000010289	19.042
transcript:ENSBTAT00000009803	19.0436
transcript:ENSBTAT00000019453	19.0491
transcript:ENSBTAT00000036973	19.0637
transcript:ENSBTAT00000048816	19.0681
transcript:ENSBTAT00000000805	19.0702
transcript:ENSBTAT00000007265	19.0744
transcript:ENSBTAT00000050846	19.0751
transcript:ENSBTAT00000014661	19.076
transcript:ENSBTAT00000009858	19.0993
transcript:ENSBTAT00000014978	19.1075
transcript:ENSBTAT00000029899	19.112
transcript:ENSBTAT00000033398	19.1159
transcript:ENSBTAT00000027889	19.1262
transcript:ENSBTAT00000027119	19.129
transcript:ENSBTAT00000052382	19.1314
transcript:ENSBTAT00000037594	19.1381
transcript:ENSBTAT00000019928	19.1588
transcript:ENSBTAT00000021983	19.1639
transcript:ENSBTAT00000034353	19.2003
transcript:ENSBTAT00000028542	19.2099
transcript:ENSBTAT00000015850	19.2112
transcript:ENSBTAT00000019675	19.2133
transcript:ENSBTAT00000063907	19.2178
transcript:ENSBTAT00000023157	19.2178
transcript:ENSBTAT00000022809	19.2308
transcript:ENSBTAT00000033991	19.2326
transcript:ENSBTAT00000027023	19.234
transcript:ENSBTAT00000066032	19.2349
transcript:ENSBTAT00000018147	19.2396
transcript:ENSBTAT00000017711	19.2397
transcript:ENSBTAT00000018766	19.243
transcript:ENSBTAT00000005511	19.2463
transcript:ENSBTAT00000010033	19.254
transcript:ENSBTAT00000036417	19.2581
transcript:ENSBTAT00000002226	19.2629
transcript:ENSBTAT00000055491	19.2653
transcript:ENSBTAT00000015999	19.2742
transcript:ENSBTAT00000021731	19.2777
transcript:ENSBTAT00000029488	19.2837
transcript:ENSBTAT00000052814	19.2848
transcript:ENSBTAT00000001923	19.3025
transcript:ENSBTAT00000066076	19.3067
transcript:ENSBTAT00000016753	19.3203
transcript:ENSBTAT00000043721	19.3258
transcript:ENSBTAT00000005830	19.3434
transcript:ENSBTAT00000038149	19.3465
transcript:ENSBTAT00000026127	19.3479
transcript:ENSBTAT00000010711	19.3479
transcript:ENSBTAT00000002625	19.3487
transcript:ENSBTAT00000063363	19.3498
transcript:ENSBTAT00000020277	19.353
transcript:ENSBTAT00000054825	19.3627
transcript:ENSBTAT00000065401	19.3748
transcript:ENSBTAT00000053317	19.3829
transcript:ENSBTAT00000064638	19.3842
transcript:ENSBTAT00000004101	19.3851
transcript:ENSBTAT00000052753	19.3866
transcript:ENSBTAT00000020547	19.3882
transcript:ENSBTAT00000027223	19.3904
transcript:ENSBTAT00000010355	19.395
transcript:ENSBTAT00000018339	19.4
transcript:ENSBTAT00000061479	19.4021
transcript:ENSBTAT00000028828	19.4048
transcript:ENSBTAT00000039673	19.4072
transcript:ENSBTAT00000002312	19.4119
transcript:ENSBTAT00000016922	19.4208
transcript:ENSBTAT00000002618	19.4337
transcript:ENSBTAT00000022714	19.4357
transcript:ENSBTAT00000023304	19.439
transcript:ENSBTAT00000019358	19.4392
transcript:ENSBTAT00000015982	19.4451
transcript:ENSBTAT00000002363	19.4481
transcript:ENSBTAT00000065633	19.4617
transcript:ENSBTAT00000003483	19.4758
transcript:ENSBTAT00000053702	19.4762
transcript:ENSBTAT00000013932	19.479
transcript:ENSBTAT00000024529	19.4823
transcript:ENSBTAT00000025250	19.4859
transcript:ENSBTAT00000064283	19.4894
transcript:ENSBTAT00000023912	19.4899
transcript:ENSBTAT00000027945	19.4969
transcript:ENSBTAT00000001767	19.5023
transcript:ENSBTAT00000016499	19.5137
transcript:ENSBTAT00000005636	19.52
transcript:ENSBTAT00000027191	19.5221
transcript:ENSBTAT00000007993	19.5274
transcript:ENSBTAT00000018852	19.5301
transcript:ENSBTAT00000064031	19.5522
transcript:ENSBTAT00000048688	19.5524
transcript:ENSBTAT00000065445	19.5554
transcript:ENSBTAT00000018376	19.5554
transcript:ENSBTAT00000011436	19.5682
transcript:ENSBTAT00000016118	19.5702
transcript:ENSBTAT00000020811	19.5705
transcript:ENSBTAT00000001607	19.572
transcript:ENSBTAT00000007809	19.5732
transcript:ENSBTAT00000004073	19.576
transcript:ENSBTAT00000029274	19.5779
transcript:ENSBTAT00000013435	19.583
transcript:ENSBTAT00000010845	19.595
transcript:ENSBTAT00000024829	19.5985
transcript:ENSBTAT00000010864	19.6031
transcript:ENSBTAT00000043790	19.6124
transcript:ENSBTAT00000020310	19.6138
transcript:ENSBTAT00000027619	19.6254
transcript:ENSBTAT00000018173	19.6301
transcript:ENSBTAT00000044586	19.6382
transcript:ENSBTAT00000004602	19.6401
transcript:ENSBTAT00000063467	19.6489
transcript:ENSBTAT00000025086	19.6498
transcript:ENSBTAT00000064375	19.6581
transcript:ENSBTAT00000047799	19.662
transcript:ENSBTAT00000023672	19.6774
transcript:ENSBTAT00000039331	19.6841
transcript:ENSBTAT00000001709	19.6888
transcript:ENSBTAT00000029250	19.6947
transcript:ENSBTAT00000061121	19.7098
transcript:ENSBTAT00000003502	19.7121
transcript:ENSBTAT00000012034	19.7134
transcript:ENSBTAT00000042836	19.7147
transcript:ENSBTAT00000020170	19.7285
transcript:ENSBTAT00000008254	19.7344
transcript:ENSBTAT00000020793	19.7396
transcript:ENSBTAT00000009228	19.7716
transcript:ENSBTAT00000016956	19.7776
transcript:ENSBTAT00000057265	19.7852
transcript:ENSBTAT00000056204	19.7861
transcript:ENSBTAT00000055206	19.7961
transcript:ENSBTAT00000043714	19.7985
transcript:ENSBTAT00000035053	19.8029
transcript:ENSBTAT00000022385	19.8045
transcript:ENSBTAT00000063748	19.8137
transcript:ENSBTAT00000037643	19.8148
transcript:ENSBTAT00000064913	19.8148
transcript:ENSBTAT00000032616	19.8192
transcript:ENSBTAT00000027794	19.8344
transcript:ENSBTAT00000000015	19.8398
transcript:ENSBTAT00000009113	19.841
transcript:ENSBTAT00000054539	19.8428
transcript:ENSBTAT00000055149	19.8472
transcript:ENSBTAT00000037556	19.8512
transcript:ENSBTAT00000000445	19.852
transcript:ENSBTAT00000015695	19.8561
transcript:ENSBTAT00000015807	19.8568
transcript:ENSBTAT00000053550	19.8735
transcript:ENSBTAT00000002600	19.8782
transcript:ENSBTAT00000054342	19.882
transcript:ENSBTAT00000013189	19.8853
transcript:ENSBTAT00000065879	19.8903
transcript:ENSBTAT00000018869	19.8907
transcript:ENSBTAT00000064722	19.8952
transcript:ENSBTAT00000004619	19.8975
transcript:ENSBTAT00000045511	19.8975
transcript:ENSBTAT00000008460	19.9081
transcript:ENSBTAT00000054074	19.9123
transcript:ENSBTAT00000025880	19.9141
transcript:ENSBTAT00000064961	19.9214
transcript:ENSBTAT00000046284	19.9216
transcript:ENSBTAT00000027283	19.9277
transcript:ENSBTAT00000006089	19.9322
transcript:ENSBTAT00000048945	19.9468
transcript:ENSBTAT00000056442	19.947
transcript:ENSBTAT00000028643	19.9473
transcript:ENSBTAT00000023744	19.9501
transcript:ENSBTAT00000025452	19.9523
transcript:ENSBTAT00000063095	19.9602
transcript:ENSBTAT00000007204	19.964
transcript:ENSBTAT00000026624	19.9685
transcript:ENSBTAT00000022589	19.9685
transcript:ENSBTAT00000039125	19.9716
transcript:ENSBTAT00000019232	19.9759
transcript:ENSBTAT00000043096	19.976
transcript:ENSBTAT00000021397	19.9778
transcript:ENSBTAT00000024078	19.9814
transcript:ENSBTAT00000066038	19.985
transcript:ENSBTAT00000033308	19.9862
transcript:ENSBTAT00000033494	19.988
transcript:ENSBTAT00000003130	19.9896
transcript:ENSBTAT00000003419	19.994
transcript:ENSBTAT00000004115	19.9977
transcript:ENSBTAT00000065995	20
transcript:ENSBTAT00000014489	20
transcript:ENSBTAT00000064080	20
transcript:ENSBTAT00000013398	20.0086
transcript:ENSBTAT00000047845	20.0203
transcript:ENSBTAT00000002170	20.0269
transcript:ENSBTAT00000048179	20.0293
transcript:ENSBTAT00000004051	20.0311
transcript:ENSBTAT00000063185	20.0359
transcript:ENSBTAT00000028621	20.0396
transcript:ENSBTAT00000011238	20.0712
transcript:ENSBTAT00000053235	20.0891
transcript:ENSBTAT00000030486	20.1025
transcript:ENSBTAT00000024887	20.1047
transcript:ENSBTAT00000004567	20.1085
transcript:ENSBTAT00000030432	20.1127
transcript:ENSBTAT00000025321	20.1317
transcript:ENSBTAT00000008325	20.136
transcript:ENSBTAT00000015977	20.1388
transcript:ENSBTAT00000043570	20.1452
transcript:ENSBTAT00000017168	20.1464
transcript:ENSBTAT00000001698	20.1593
transcript:ENSBTAT00000055571	20.1639
transcript:ENSBTAT00000047005	20.1735
transcript:ENSBTAT00000063372	20.1754
transcript:ENSBTAT00000028831	20.1779
transcript:ENSBTAT00000022375	20.1795
transcript:ENSBTAT00000028212	20.183
transcript:ENSBTAT00000019004	20.1848
transcript:ENSBTAT00000027865	20.1897
transcript:ENSBTAT00000063746	20.1897
transcript:ENSBTAT00000006956	20.1911
transcript:ENSBTAT00000011769	20.2033
transcript:ENSBTAT00000000988	20.2141
transcript:ENSBTAT00000025925	20.218
transcript:ENSBTAT00000022579	20.224
transcript:ENSBTAT00000053843	20.2242
transcript:ENSBTAT00000029153	20.2401
transcript:ENSBTAT00000008243	20.2597
transcript:ENSBTAT00000004893	20.2791
transcript:ENSBTAT00000043111	20.2809
transcript:ENSBTAT00000061487	20.2917
transcript:ENSBTAT00000006260	20.3001
transcript:ENSBTAT00000039896	20.3002
transcript:ENSBTAT00000035608	20.3023
transcript:ENSBTAT00000000461	20.3111
transcript:ENSBTAT00000016291	20.3159
transcript:ENSBTAT00000005496	20.3206
transcript:ENSBTAT00000006465	20.3308
transcript:ENSBTAT00000033403	20.3379
transcript:ENSBTAT00000006848	20.3408
transcript:ENSBTAT00000010620	20.3408
transcript:ENSBTAT00000016395	20.3414
transcript:ENSBTAT00000052346	20.3451
transcript:ENSBTAT00000036966	20.3493
transcript:ENSBTAT00000027511	20.3513
transcript:ENSBTAT00000015802	20.3673
transcript:ENSBTAT00000017674	20.3799
transcript:ENSBTAT00000003206	20.3893
transcript:ENSBTAT00000000169	20.3927
transcript:ENSBTAT00000006041	20.3985
transcript:ENSBTAT00000045004	20.405
transcript:ENSBTAT00000046141	20.4384
transcript:ENSBTAT00000064918	20.4497
transcript:ENSBTAT00000065047	20.4555
transcript:ENSBTAT00000035086	20.4601
transcript:ENSBTAT00000028657	20.4609
transcript:ENSBTAT00000043137	20.4622
transcript:ENSBTAT00000046340	20.473
transcript:ENSBTAT00000066339	20.4748
transcript:ENSBTAT00000062935	20.4777
transcript:ENSBTAT00000006411	20.4777
transcript:ENSBTAT00000026793	20.4793
transcript:ENSBTAT00000044066	20.4883
transcript:ENSBTAT00000021306	20.5003
transcript:ENSBTAT00000064160	20.5016
transcript:ENSBTAT00000053713	20.5042
transcript:ENSBTAT00000022855	20.5049
transcript:ENSBTAT00000028662	20.512
transcript:ENSBTAT00000056382	20.5201
transcript:ENSBTAT00000014350	20.5298
transcript:ENSBTAT00000013466	20.5521
transcript:ENSBTAT00000000782	20.5525
transcript:ENSBTAT00000048357	20.5542
transcript:ENSBTAT00000012161	20.5647
transcript:ENSBTAT00000046159	20.565
transcript:ENSBTAT00000052710	20.5698
transcript:ENSBTAT00000035177	20.5708
transcript:ENSBTAT00000003775	20.5781
transcript:ENSBTAT00000061233	20.5781
transcript:ENSBTAT00000017129	20.5836
transcript:ENSBTAT00000001963	20.5843
transcript:ENSBTAT00000043880	20.5873
transcript:ENSBTAT00000065619	20.5873
transcript:ENSBTAT00000057487	20.6027
transcript:ENSBTAT00000012351	20.6045
transcript:ENSBTAT00000013409	20.6186
transcript:ENSBTAT00000065613	20.6189
transcript:ENSBTAT00000020642	20.6328
transcript:ENSBTAT00000013979	20.6384
transcript:ENSBTAT00000001348	20.6463
transcript:ENSBTAT00000022557	20.6501
transcript:ENSBTAT00000005450	20.659
transcript:ENSBTAT00000015742	20.6691
transcript:ENSBTAT00000032752	20.6767
transcript:ENSBTAT00000005821	20.6924
transcript:ENSBTAT00000022189	20.7207
transcript:ENSBTAT00000063374	20.7266
transcript:ENSBTAT00000052898	20.7307
transcript:ENSBTAT00000047541	20.7492
transcript:ENSBTAT00000043509	20.7492
transcript:ENSBTAT00000005938	20.7497
transcript:ENSBTAT00000004825	20.7519
transcript:ENSBTAT00000014034	20.7534
transcript:ENSBTAT00000007284	20.7537
transcript:ENSBTAT00000035403	20.7589
transcript:ENSBTAT00000061345	20.7692
transcript:ENSBTAT00000012159	20.7716
transcript:ENSBTAT00000021129	20.7773
transcript:ENSBTAT00000017006	20.7879
transcript:ENSBTAT00000044888	20.7975
transcript:ENSBTAT00000042939	20.8123
transcript:ENSBTAT00000050784	20.8217
transcript:ENSBTAT00000010299	20.8244
transcript:ENSBTAT00000004148	20.8281
transcript:ENSBTAT00000047910	20.8322
transcript:ENSBTAT00000026179	20.8343
transcript:ENSBTAT00000004636	20.844
transcript:ENSBTAT00000038271	20.85
transcript:ENSBTAT00000048680	20.8552
transcript:ENSBTAT00000013412	20.8586
transcript:ENSBTAT00000022876	20.8599
transcript:ENSBTAT00000024261	20.8611
transcript:ENSBTAT00000010730	20.8674
transcript:ENSBTAT00000032213	20.8724
transcript:ENSBTAT00000015717	20.8768
transcript:ENSBTAT00000053229	20.8982
transcript:ENSBTAT00000061463	20.8984
transcript:ENSBTAT00000038197	20.9007
transcript:ENSBTAT00000005494	20.9024
transcript:ENSBTAT00000032110	20.9119
transcript:ENSBTAT00000011774	20.9137
transcript:ENSBTAT00000056233	20.9345
transcript:ENSBTAT00000053513	20.9402
transcript:ENSBTAT00000013871	20.9407
transcript:ENSBTAT00000016159	20.9452
transcript:ENSBTAT00000045760	20.9572
transcript:ENSBTAT00000008883	20.9582
transcript:ENSBTAT00000061569	20.9702
transcript:ENSBTAT00000063269	20.9722
transcript:ENSBTAT00000055901	20.9759
transcript:ENSBTAT00000008142	20.9882
transcript:ENSBTAT00000004727	20.9897
transcript:ENSBTAT00000060990	20.9912
transcript:ENSBTAT00000064189	20.9928
transcript:ENSBTAT00000012815	20.9995
transcript:ENSBTAT00000061513	21.0031
transcript:ENSBTAT00000028333	21.0094
transcript:ENSBTAT00000022712	21.0108
transcript:ENSBTAT00000009984	21.0123
transcript:ENSBTAT00000064309	21.0125
transcript:ENSBTAT00000013165	21.0181
transcript:ENSBTAT00000049339	21.0227
transcript:ENSBTAT00000024135	21.0229
transcript:ENSBTAT00000063971	21.0256
transcript:ENSBTAT00000038317	21.0309
transcript:ENSBTAT00000061581	21.0351
transcript:ENSBTAT00000014699	21.0383
transcript:ENSBTAT00000045233	21.0431
transcript:ENSBTAT00000045235	21.0431
transcript:ENSBTAT00000000767	21.0467
transcript:ENSBTAT00000026798	21.0555
transcript:ENSBTAT00000003484	21.0562
transcript:ENSBTAT00000009302	21.059
transcript:ENSBTAT00000014770	21.0614
transcript:ENSBTAT00000025479	21.066
transcript:ENSBTAT00000036726	21.0661
transcript:ENSBTAT00000008875	21.0665
transcript:ENSBTAT00000007450	21.0697
transcript:ENSBTAT00000026762	21.0825
transcript:ENSBTAT00000022638	21.0831
transcript:ENSBTAT00000047061	21.0862
transcript:ENSBTAT00000043708	21.0874
transcript:ENSBTAT00000005581	21.0911
transcript:ENSBTAT00000001268	21.0945
transcript:ENSBTAT00000010892	21.0976
transcript:ENSBTAT00000010692	21.0986
transcript:ENSBTAT00000004198	21.101
transcript:ENSBTAT00000021759	21.1155
transcript:ENSBTAT00000012852	21.1195
transcript:ENSBTAT00000061323	21.1195
transcript:ENSBTAT00000001465	21.1239
transcript:ENSBTAT00000026323	21.1242
transcript:ENSBTAT00000039158	21.1335
transcript:ENSBTAT00000044230	21.1336
transcript:ENSBTAT00000008808	21.1384
transcript:ENSBTAT00000044541	21.1403
transcript:ENSBTAT00000017376	21.1453
transcript:ENSBTAT00000026396	21.156
transcript:ENSBTAT00000004977	21.1562
transcript:ENSBTAT00000054636	21.1615
transcript:ENSBTAT00000064035	21.1646
transcript:ENSBTAT00000012068	21.1651
transcript:ENSBTAT00000055832	21.1712
transcript:ENSBTAT00000064686	21.1715
transcript:ENSBTAT00000001176	21.1733
transcript:ENSBTAT00000004880	21.1838
transcript:ENSBTAT00000007814	21.1858
transcript:ENSBTAT00000005959	21.1858
transcript:ENSBTAT00000028047	21.1914
transcript:ENSBTAT00000032751	21.1926
transcript:ENSBTAT00000000143	21.1957
transcript:ENSBTAT00000045249	21.1995
transcript:ENSBTAT00000029039	21.208
transcript:ENSBTAT00000054605	21.2098
transcript:ENSBTAT00000004007	21.2121
transcript:ENSBTAT00000030764	21.2144
transcript:ENSBTAT00000009627	21.2183
transcript:ENSBTAT00000009628	21.2183
transcript:ENSBTAT00000016060	21.2203
transcript:ENSBTAT00000023750	21.2358
transcript:ENSBTAT00000001883	21.2485
transcript:ENSBTAT00000056670	21.2563
transcript:ENSBTAT00000023192	21.2574
transcript:ENSBTAT00000009760	21.269
transcript:ENSBTAT00000004810	21.2717
transcript:ENSBTAT00000030639	21.2795
transcript:ENSBTAT00000044657	21.2815
transcript:ENSBTAT00000046553	21.291
transcript:ENSBTAT00000028074	21.2927
transcript:ENSBTAT00000021739	21.2996
transcript:ENSBTAT00000032217	21.3046
transcript:ENSBTAT00000017894	21.306
transcript:ENSBTAT00000065257	21.3076
transcript:ENSBTAT00000035145	21.3141
transcript:ENSBTAT00000066280	21.3158
transcript:ENSBTAT00000027776	21.3167
transcript:ENSBTAT00000063975	21.3173
transcript:ENSBTAT00000020937	21.3208
transcript:ENSBTAT00000037717	21.3267
transcript:ENSBTAT00000008907	21.3363
transcript:ENSBTAT00000052587	21.3388
transcript:ENSBTAT00000008518	21.3423
transcript:ENSBTAT00000038341	21.3503
transcript:ENSBTAT00000020418	21.3518
transcript:ENSBTAT00000064879	21.3534
transcript:ENSBTAT00000024088	21.3707
transcript:ENSBTAT00000003205	21.3767
transcript:ENSBTAT00000056900	21.3885
transcript:ENSBTAT00000024903	21.3887
transcript:ENSBTAT00000064723	21.3934
transcript:ENSBTAT00000052029	21.4
transcript:ENSBTAT00000017940	21.4077
transcript:ENSBTAT00000064202	21.4135
transcript:ENSBTAT00000006156	21.4286
transcript:ENSBTAT00000045006	21.4289
transcript:ENSBTAT00000029080	21.4391
transcript:ENSBTAT00000023564	21.4401
transcript:ENSBTAT00000040023	21.4412
transcript:ENSBTAT00000064299	21.4412
transcript:ENSBTAT00000005667	21.4464
transcript:ENSBTAT00000049153	21.4507
transcript:ENSBTAT00000049169	21.4507
transcript:ENSBTAT00000007461	21.4601
transcript:ENSBTAT00000009864	21.465
transcript:ENSBTAT00000051964	21.4672
transcript:ENSBTAT00000009094	21.4676
transcript:ENSBTAT00000024301	21.4786
transcript:ENSBTAT00000021217	21.4848
transcript:ENSBTAT00000053583	21.4885
transcript:ENSBTAT00000015301	21.4897
transcript:ENSBTAT00000053960	21.51
transcript:ENSBTAT00000065581	21.51
transcript:ENSBTAT00000063469	21.5229
transcript:ENSBTAT00000021720	21.5269
transcript:ENSBTAT00000065708	21.5369
transcript:ENSBTAT00000007616	21.5424
transcript:ENSBTAT00000032930	21.5445
transcript:ENSBTAT00000013152	21.5474
transcript:ENSBTAT00000065132	21.5554
transcript:ENSBTAT00000026003	21.5769
transcript:ENSBTAT00000052364	21.5789
transcript:ENSBTAT00000021258	21.5861
transcript:ENSBTAT00000011169	21.5919
transcript:ENSBTAT00000065425	21.5919
transcript:ENSBTAT00000024051	21.597
transcript:ENSBTAT00000012612	21.6053
transcript:ENSBTAT00000009736	21.6117
transcript:ENSBTAT00000061143	21.6135
transcript:ENSBTAT00000026779	21.6174
[truncated: 10,376 more rows]

## Sheet: Upregulated_in cryo
Upregulated Transcript ID	Gene Name	Coverage Fresh	Coverage Cryo	FPKM Fresh	FPKM Cryo	log2(fold_change)
transcript:ENSBTAT00000019948	RPRD2	34.4322	44.5293	9.71031e-05	0.580739	12.5461
transcript:ENSBTAT00000043704	gene:ENSBTAG00000030892	52.516	99.9085	0.0385986	20.2252	9.03339
transcript:ENSBTAT00000031172	gene:ENSBTAG00000030838	55.1209	97.8663	0.0663945	12.8173	7.59282
transcript:ENSBTAT00000063009	gene:ENSBTAG00000047823	33.697	98.6667	0.01192	1.3323	6.80439
transcript:ENSBTAT00000009443	AVPR1A	35.3753	52.459	0.0102824	0.762139	6.2118
transcript:ENSBTAT00000063986	gene:ENSBTAG00000046264	38.8889	85.9111	0.00743419	0.523805	6.13871
transcript:ENSBTAT00000053818	MARVELD2	38.3374	56.9947	0.0114108	0.723786	5.98709
transcript:ENSBTAT00000009796	NGF	73.4533	100	0.0249582	1.42302	5.8333
transcript:ENSBTAT00000065475	KCNA6	17.4543	97.5425	0.0124588	0.680695	5.77177
transcript:ENSBTAT00000011264	SALL1	44.9561	87.0077	0.0138628	0.744865	5.74768
transcript:ENSBTAT00000036098	GRIN3B	28.789	80.483	0.0108031	0.527064	5.60846
transcript:ENSBTAT00000002431	SGCG	29.9012	26.9381	0.012761	0.554465	5.44129
transcript:ENSBTAT00000037847	ELOA	20.8023	39.7155	0.0163544	0.696171	5.41169
transcript:ENSBTAT00000057417	FAM43A	25.0786	90.8019	0.0160969	0.576868	5.16339
transcript:ENSBTAT00000025957	USP6NL	43.3731	44.4109	0.0225208	0.806471	5.16229
transcript:ENSBTAT00000003368	SP8	51.7992	92.8033	0.0264042	0.934421	5.14523
transcript:ENSBTAT00000007096	XKR6	23.633	89.0639	0.0648831	2.19703	5.08157
transcript:ENSBTAT00000063797	gene:ENSBTAG00000045589	57.0346	97.4026	0.0237627	0.760696	5.00055
transcript:ENSBTAT00000052685	gene:ENSBTAG00000039370	28.3389	50.8418	0.0238607	0.724287	4.92385
transcript:ENSBTAT00000052929	gene:ENSBTAG00000039706	28.8064	58.1189	0.0234736	0.706372	4.91132
transcript:ENSBTAT00000022175	C1QL3	42.1937	50.4791	0.0220153	0.659387	4.90454
transcript:ENSBTAT00000053940	gene:ENSBTAG00000016774	16.7708	96.4583	0.022647	0.652102	4.84771
transcript:ENSBTAT00000001735	DMRTA1	11.2614	34.0464	0.0200773	0.576881	4.84464
transcript:ENSBTAT00000005409	gene:ENSBTAG00000018221	64.2857	67.5983	0.0224712	0.641583	4.83549
transcript:ENSBTAT00000063628	gene:ENSBTAG00000046115	55.414	85.6688	0.0231915	0.658992	4.8286
transcript:ENSBTAT00000052181	gene:ENSBTAG00000038479	82.2779	92.4352	0.0207029	0.554901	4.74432
transcript:ENSBTAT00000024196	gene:ENSBTAG00000018182	24.8408	83.8641	0.0231915	0.594292	4.67951
transcript:ENSBTAT00000042549	BTBD17	22.9184	30.6184	0.025396	0.629902	4.63246
transcript:ENSBTAT00000065842	gene:ENSBTAG00000045561	52.6429	88.0259	0.0473312	1.16064	4.61599
transcript:ENSBTAT00000007471	GPR183	36.9687	67.9445	0.0264955	0.619999	4.54845
transcript:ENSBTAT00000022142	KCNA1	57.1909	95.6989	0.0402344	0.93735	4.54209
transcript:ENSBTAT00000065179	CHD2	37.7821	43.9141	0.0338988	0.768401	4.50255
transcript:ENSBTAT00000061448	EOMES	55.7344	97.6347	0.0336563	0.754579	4.48672
transcript:ENSBTAT00000047913	gene:ENSBTAG00000039769	51.8694	90.0474	0.0648568	1.36471	4.3952
transcript:ENSBTAT00000011019	gene:ENSBTAG00000008370	55.814	90.0492	0.0434251	0.896282	4.36735
transcript:ENSBTAT00000019669	AKAP12	60.4811	100	0.157678	3.18128	4.33456
transcript:ENSBTAT00000003743	SORBS1	42.1049	42.8318	0.0280471	0.538516	4.26307
transcript:ENSBTAT00000043013	gene:ENSBTAG00000047617	21.1356	86.8559	0.0414037	0.789494	4.2531
transcript:ENSBTAT00000052480	gene:ENSBTAG00000006605	66.9782	88.5774	0.0451175	0.859364	4.25151
transcript:ENSBTAT00000063670	gene:ENSBTAG00000046347	89.9123	85.0877	0.0654697	1.23732	4.24025
transcript:ENSBTAT00000014573	PROX1	39.7372	57.8246	0.0784735	1.46394	4.22151
transcript:ENSBTAT00000013177	CPEB4	37.1768	38.5777	0.030339	0.563546	4.21529
transcript:ENSBTAT00000024158	gene:ENSBTAG00000018151	56.0493	71.8278	0.0377661	0.700908	4.21406
transcript:ENSBTAT00000013737	MYH9	26.7038	38.533	0.0357815	0.664044	4.21399
transcript:ENSBTAT00000064038	SOX4	48.705	60.0758	0.0517563	0.955672	4.20671
transcript:ENSBTAT00000065618	gene:ENSBTAG00000046690	55.5556	94.1441	0.036716	0.66675	4.18267
transcript:ENSBTAT00000032323	C23H6orf47	46.9549	81.7296	0.0479433	0.819795	4.09586
transcript:ENSBTAT00000000543	TSHZ1	28.9734	98.3612	0.0380375	0.633962	4.0589
transcript:ENSBTAT00000064378	gene:ENSBTAG00000047411	87.2276	99.9249	0.585288	9.63436	4.04097
transcript:ENSBTAT00000028893	gene:ENSBTAG00000030719	73.8095	99.4824	0.045832	0.732254	3.99792
transcript:ENSBTAT00000052066	RBM15	35.1913	89.5082	0.0328604	0.521261	3.98759
transcript:ENSBTAT00000021454	gene:ENSBTAG00000016119	43.1435	90.9283	0.0460142	0.698476	3.92406
transcript:ENSBTAT00000007933	ARHGDIB	48.4253	47.8061	0.0532091	0.797679	3.90606
transcript:ENSBTAT00000018063	gene:ENSBTAG00000013585	63.5934	89.4799	0.0532046	0.767556	3.85065
transcript:ENSBTAT00000064779	gene:ENSBTAG00000045558	82.5496	89.5507	0.045472	0.652139	3.84213
transcript:ENSBTAT00000023357	gene:ENSBTAG00000017570	99.8652	100	0.158214	2.25374	3.83237
transcript:ENSBTAT00000049902	gene:ENSBTAG00000033558	42.7278	97.2239	0.0522039	0.715737	3.7772
transcript:ENSBTAT00000066267	gene:ENSBTAG00000046871	69.0705	96.7949	0.0805516	1.10426	3.77703
transcript:ENSBTAT00000011165	gene:ENSBTAG00000008481	78.9527	80.1611	0.0434251	0.584324	3.75017
transcript:ENSBTAT00000000986	MBOAT4	48.2414	76.6227	0.0623082	0.833536	3.74175
transcript:ENSBTAT00000064565	gene:ENSBTAG00000046928	38.7324	72.8873	0.047503	0.627577	3.7237
transcript:ENSBTAT00000006784	gene:ENSBTAG00000005143	45.9495	91.1687	0.0821249	1.04882	3.6748
transcript:ENSBTAT00000027204	RAP2A	35.791	41.584	0.051491	0.640944	3.63781
transcript:ENSBTAT00000004430	gene:ENSBTAG00000023542	99.835	89.604	0.0417284	0.511022	3.61428
transcript:ENSBTAT00000022334	gene:ENSBTAG00000016789	48.2571	88.3442	0.0479189	0.569353	3.57066
transcript:ENSBTAT00000054712	HTR1A	86.052	97.7147	0.0615973	0.731273	3.56947
transcript:ENSBTAT00000054151	gene:ENSBTAG00000038290	68.0556	93.8034	0.0701364	0.824092	3.55457
transcript:ENSBTAT00000063718	gene:ENSBTAG00000047726	98.4216	100	0.43942	5.03129	3.51726
transcript:ENSBTAT00000065477	gene:ENSBTAG00000048014	35.1506	91.2482	0.0723648	0.808982	3.48275
transcript:ENSBTAT00000059607	RF00090	100	100	0.767072	8.55207	3.47884
transcript:ENSBTAT00000065903	gene:ENSBTAG00000047399	17.5325	92.2078	0.0478529	0.531591	3.47364
transcript:ENSBTAT00000057464	gene:ENSBTAG00000038438	100	94.239	0.059661	0.639026	3.42101
transcript:ENSBTAT00000021628	KIAA1958	44.3718	36.8857	0.0517538	0.533595	3.36601
transcript:ENSBTAT00000011325	gene:ENSBTAG00000008588	93.8492	83.9286	0.0555978	0.569255	3.35597
transcript:ENSBTAT00000061347	SKIDA1	52.8693	67.5676	0.0923697	0.945155	3.35506
transcript:ENSBTAT00000057034	gene:ENSBTAG00000039467	75.7862	87.631	0.0684769	0.688692	3.33017
transcript:ENSBTAT00000007148	MB21D2	49.1992	92.3767	0.0764654	0.768167	3.32854
transcript:ENSBTAT00000014674	PLPP6	34.0889	87.2711	0.0512185	0.50983	3.31528
transcript:ENSBTAT00000003331	SSU72	11.7	33.9796	0.0932143	0.914523	3.2944
transcript:ENSBTAT00000052413	gene:ENSBTAG00000039664	75.8228	100	0.0814297	0.796715	3.29044
transcript:ENSBTAT00000023846	gene:ENSBTAG00000017931	96.7846	100	0.135887	1.30526	3.26386
transcript:ENSBTAT00000055790	gene:ENSBTAG00000039757	40.8008	80.7436	0.0656039	0.629861	3.26318
transcript:ENSBTAT00000015487	CEP152	41.628	47.842	0.117383	1.06717	3.18449
transcript:ENSBTAT00000025495	FRS2	44.0884	65.61	0.0864562	0.784061	3.18092
transcript:ENSBTAT00000066220	gene:ENSBTAG00000047322	71.757	85.5501	0.0743509	0.670305	3.1724
transcript:ENSBTAT00000050719	gene:ENSBTAG00000045758	65.5296	81.6876	0.171256	1.53051	3.15978
transcript:ENSBTAT00000017451	gene:ENSBTAG00000013130	73.5141	88.634	0.0680298	0.606152	3.15544
transcript:ENSBTAT00000013961	gene:ENSBTAG00000026365	85.0996	94.6614	0.0799986	0.705256	3.1401
transcript:ENSBTAT00000054810	gene:ENSBTAG00000038562	87.2541	79.3863	0.0612045	0.512064	3.06461
transcript:ENSBTAT00000054222	gene:ENSBTAG00000037684	78.6091	93.1507	0.147511	1.23035	3.06017
transcript:ENSBTAT00000000349	gene:ENSBTAG00000000280	76.6667	92.6882	0.113271	0.895464	2.98286
transcript:ENSBTAT00000064254	gene:ENSBTAG00000046424	56.5464	80.4671	0.113731	0.871253	2.93747
transcript:ENSBTAT00000028519	gene:ENSBTAG00000022137	100	100	0.177568	1.32765	2.90243
transcript:ENSBTAT00000019791	gene:ENSBTAG00000014862	100	100	0.0912207	0.67488	2.8872
transcript:ENSBTAT00000052933	gene:ENSBTAG00000039773	98.3642	77.2083	0.213366	1.5703	2.87964
transcript:ENSBTAT00000014244	gene:ENSBTAG00000010752	95.5511	98.3822	0.104924	0.757885	2.85263
transcript:ENSBTAT00000045584	TNFSF12	17.4401	70.2448	0.0722417	0.514286	2.83167
transcript:ENSBTAT00000026433	gene:ENSBTAG00000011735	69.146	73.0028	0.0988219	0.69856	2.82148
transcript:ENSBTAT00000052718	ZBTB34	68.3627	96.4775	0.0837432	0.563932	2.75148
transcript:ENSBTAT00000000484	LRRTM4	53.6538	94.4872	0.10979	0.734825	2.74266
transcript:ENSBTAT00000031311	gene:ENSBTAG00000023037	85.7143	84.9421	0.106491	0.707211	2.73141
transcript:ENSBTAT00000052339	PCDHB1	49.0435	76.3533	0.0830556	0.542342	2.70705
transcript:ENSBTAT00000012058	ZNF391	25.1242	79.6309	0.126631	0.818873	2.69301
transcript:ENSBTAT00000061511	MAF	69.4885	83.5979	0.115243	0.744997	2.69256
transcript:ENSBTAT00000055192	gene:ENSBTAG00000011521	75.8149	90.326	0.197387	1.24174	2.65326
transcript:ENSBTAT00000054547	gene:ENSBTAG00000040339	51.3062	91.8495	0.0865559	0.543007	2.64927
transcript:ENSBTAT00000022848	gene:ENSBTAG00000030305	100	70.4819	0.300174	1.87401	2.64226
transcript:ENSBTAT00000056897	gene:ENSBTAG00000037399	95.5939	92.7203	0.157826	0.98	2.63445
transcript:ENSBTAT00000000284	OR51E1	75.0524	95.7023	0.12373	0.765753	2.62969
transcript:ENSBTAT00000031607	CCDC186	36.8819	36.6116	0.0957624	0.589098	2.62098
transcript:ENSBTAT00000065479	RF00017	100	92.517	0.154079	0.947557	2.62054
transcript:ENSBTAT00000013964	gene:ENSBTAG00000010553	100	93.4043	0.12451	0.724198	2.54013
transcript:ENSBTAT00000004167	BLCAP	35.7544	69.6811	0.115579	0.663634	2.52151
transcript:ENSBTAT00000026223	MC4R	95.3997	96.8948	0.175757	1.00665	2.51791
transcript:ENSBTAT00000028517	FLRT2	99.0419	87.2416	0.143834	0.823247	2.51693
transcript:ENSBTAT00000024607	AFF1	49.8946	65.1457	0.126759	0.7139	2.49363
transcript:ENSBTAT00000059254	RF00015	82.2695	94.3262	21.9945	123.755	2.49227
transcript:ENSBTAT00000030820	gene:ENSBTAG00000007966	32.9851	38.1111	0.112717	0.631185	2.48535
transcript:ENSBTAT00000023205	DUSP18	31.8304	74.7261	0.0999909	0.551773	2.46421
transcript:ENSBTAT00000019113	TMCC3	47.338	61.7931	0.104089	0.572902	2.46047
transcript:ENSBTAT00000019323	PDGFA	4.16467	28.6926	0.192723	1.04268	2.43569
transcript:ENSBTAT00000003762	ATOH1	29.0859	81.2096	0.128592	0.694617	2.43341
transcript:ENSBTAT00000004608	S1PR5	30.122	72.439	0.192641	1.03979	2.43231
transcript:ENSBTAT00000013235	gene:ENSBTAG00000010035	95.0433	88.749	0.222602	1.19113	2.41979
transcript:ENSBTAT00000045622	gene:ENSBTAG00000032156	43.6156	38.489	0.151872	0.809102	2.41346
transcript:ENSBTAT00000052777	gene:ENSBTAG00000008324	69.4617	71.4286	0.116709	0.614186	2.39576
transcript:ENSBTAT00000031535	NXNL2	51.4513	87.9474	0.125274	0.640817	2.35483
transcript:ENSBTAT00000014745	RTN4	40.6204	41.4161	0.154901	0.788843	2.34839
transcript:ENSBTAT00000065621	LRRC10B	49.6286	97.7252	0.210233	1.05713	2.33009
transcript:ENSBTAT00000013450	LYSMD4	84.3023	100	0.309034	1.55205	2.32834
transcript:ENSBTAT00000064383	gene:ENSBTAG00000046086	26.7742	61.0753	0.127689	0.632413	2.30824
transcript:ENSBTAT00000064653	RF00017	100	97.9798	1.03274	5.07435	2.29674
transcript:ENSBTAT00000008241	RBFOX3	15.9405	22.0218	0.144838	0.704467	2.28209
transcript:ENSBTAT00000063462	TENT5C	48.6408	52.233	0.23823	1.15829	2.28157
transcript:ENSBTAT00000062952	PRR30	85.7143	98.4962	0.188334	0.897453	2.25255
transcript:ENSBTAT00000004277	HOXC4	42.9108	84.0845	0.108877	0.518067	2.25043
transcript:ENSBTAT00000063240	gene:ENSBTAG00000047313	87.7395	91.7837	0.214624	1.01931	2.24772
transcript:ENSBTAT00000015524	C25H16orf45	38.5908	42.3291	4.31984	20.5159	2.24769
transcript:ENSBTAT00000028589	TWIST2	18.6897	27.4462	0.108235	0.509036	2.2336
transcript:ENSBTAT00000054746	gene:ENSBTAG00000039437	79.6816	58.605	0.14943	0.676531	2.17868
transcript:ENSBTAT00000063616	gene:ENSBTAG00000045788	100	100	0.685282	3.08721	2.17153
transcript:ENSBTAT00000020753	SIMC1	38.6488	29.5023	0.309704	1.39096	2.16712
transcript:ENSBTAT00000025619	BLOC1S5	35.3622	60.9549	0.168157	0.740983	2.13963
transcript:ENSBTAT00000015700	gene:ENSBTAG00000011830	100	100	0.13769	0.60338	2.13164
transcript:ENSBTAT00000059274	RF00100	100	92.8826	0.235963	1.02696	2.12175
transcript:ENSBTAT00000015687	PHF14	49.2631	50.8186	0.684844	2.96974	2.11649
transcript:ENSBTAT00000017828	CTDSPL	39.3565	41.0039	0.145684	0.626987	2.10559
transcript:ENSBTAT00000044039	OR4S1	100	100	0.12859	0.551099	2.09953
transcript:ENSBTAT00000004630	gene:ENSBTAG00000003560	67.9587	49.2248	0.298458	1.27588	2.09589
transcript:ENSBTAT00000037061	gene:ENSBTAG00000026157	100	100	0.143441	0.608909	2.08577
transcript:ENSBTAT00000038638	gene:ENSBTAG00000026992	100	100	0.466999	1.95921	2.06878
transcript:ENSBTAT00000053598	gene:ENSBTAG00000038059	92.4868	82.4339	0.575436	2.41294	2.06807
transcript:ENSBTAT00000060242	RF00100	93.6556	92.145	0.166914	0.69732	2.06272
transcript:ENSBTAT00000055994	gene:ENSBTAG00000037505	85.836	90.6283	2.49409	10.3959	2.05943
transcript:ENSBTAT00000011527	OLIG3	55.6777	99.3895	0.158482	0.657622	2.05294
transcript:ENSBTAT00000003768	gene:ENSBTAG00000002900	87.1504	97.5813	0.382987	1.55106	2.01789
transcript:ENSBTAT00000063716	gene:ENSBTAG00000046344	92.4949	100	0.160638	0.649077	2.01458
transcript:ENSBTAT00000064931	gene:ENSBTAG00000046283	81.1219	100	0.49124	1.94221	1.9832
transcript:ENSBTAT00000034686	KCNJ16	69.8473	92.4358	0.440409	1.72872	1.97279
transcript:ENSBTAT00000063625	SPACA4	40.2667	87.2	0.18665	0.720717	1.94909
transcript:ENSBTAT00000063291	gene:ENSBTAG00000048080	71.6129	77.5806	0.168004	0.647536	1.94646
transcript:ENSBTAT00000056449	CNGA3	30.3183	40.927	0.249749	0.943005	1.91679
transcript:ENSBTAT00000001319	TENT5A	83.3813	76.4706	0.151677	0.561453	1.88816
transcript:ENSBTAT00000045969	DNAJB5	23.0153	46.2977	0.242624	0.882105	1.86222
transcript:ENSBTAT00000065608	gene:ENSBTAG00000047837	28.8623	17.0288	0.153856	0.556759	1.85547
transcript:ENSBTAT00000008489	gene:ENSBTAG00000006473	75.5814	100	0.161543	0.58428	1.85474
transcript:ENSBTAT00000044059	YWHAH	76.6043	71.123	0.143362	0.511761	1.8358
transcript:ENSBTAT00000063634	gene:ENSBTAG00000047516	79.0335	89.368	0.168596	0.598958	1.82889
transcript:ENSBTAT00000064434	OR56B4	62.5845	83.6213	0.246674	0.865993	1.81175
transcript:ENSBTAT00000010541	STX17	44.4868	41.3167	0.204624	0.718262	1.81154
transcript:ENSBTAT00000032158	FAM186A	40.1153	39.8001	0.177839	0.613221	1.78584
transcript:ENSBTAT00000060363	RF00100	100	98.7421	0.259855	0.882497	1.76388
transcript:ENSBTAT00000026611	PCDH10	44.3801	44.4531	0.388478	1.31669	1.76101
transcript:ENSBTAT00000021729	SATB2	45.2052	47.2531	0.151843	0.509933	1.74772
transcript:ENSBTAT00000011340	PRICKLE1	36.8433	38.8993	0.178647	0.596729	1.73997
transcript:ENSBTAT00000027534	BAZ2B	36.2994	31.3098	0.19262	0.638994	1.73004
transcript:ENSBTAT00000039564	OR4X1	64.9462	97.4194	0.529791	1.74115	1.71655
transcript:ENSBTAT00000059099	RF00100	100	100	0.207547	0.680033	1.71216
transcript:ENSBTAT00000012151	gene:ENSBTAG00000009220	100	79.3566	0.469188	1.52784	1.70326
transcript:ENSBTAT00000026199	TMUB2	33.5587	62.9379	0.375121	1.20412	1.68255
transcript:ENSBTAT00000007916	BEX3	26.2142	53.2269	0.163424	0.523802	1.6804
transcript:ENSBTAT00000022592	PIN1	28.8827	69.0443	0.162589	0.520549	1.67881
transcript:ENSBTAT00000040854	RF00003	100	100	0.189113	0.597249	1.65908
transcript:ENSBTAT00000063261	PRPF38B	77.3916	74.5063	3.37931	10.523	1.63875
transcript:ENSBTAT00000006825	SYS1	34.5408	39.3041	0.186443	0.57923	1.6354
transcript:ENSBTAT00000017102	BMP5	44.5036	40.5722	0.240484	0.744605	1.63054
transcript:ENSBTAT00000020109	CITED4	34.9739	80.6115	0.167702	0.508693	1.60089
transcript:ENSBTAT00000030247	gene:ENSBTAG00000033030	100	83.9744	0.195233	0.591685	1.59963
transcript:ENSBTAT00000014885	SYT11	25.2888	28.5228	0.26988	0.801212	1.56987
transcript:ENSBTAT00000063198	gene:ENSBTAG00000047961	100	100	0.197504	0.582351	1.56001
transcript:ENSBTAT00000045223	TMEM251	26.9648	78.1589	0.434258	1.2729	1.5515
transcript:ENSBTAT00000056456	gene:ENSBTAG00000037799	35.8573	37.2481	0.22863	0.66678	1.5442
transcript:ENSBTAT00000012504	LUZP1	60.6854	70.1908	0.191036	0.556257	1.5419
transcript:ENSBTAT00000016104	SIX1	48.2792	79.3996	0.22223	0.642041	1.53061
transcript:ENSBTAT00000054320	gene:ENSBTAG00000019925	83.9521	72.0958	0.204506	0.587731	1.52301
transcript:ENSBTAT00000002324	SPRY2	85.4277	85.5861	0.281934	0.807081	1.51736
transcript:ENSBTAT00000061397	SMIM4	24.4313	26.4257	0.926976	2.63861	1.50917
transcript:ENSBTAT00000028665	gene:ENSBTAG00000026633	100	95.6803	0.191773	0.541223	1.49683
transcript:ENSBTAT00000012189	SZRD1	10.2957	49.0738	0.319115	0.898569	1.49355
transcript:ENSBTAT00000005708	gene:ENSBTAG00000004369	63.3008	84.3648	0.212458	0.596474	1.48928
transcript:ENSBTAT00000061494	MEIS2	47.0334	41.9498	0.279122	0.779463	1.48159
transcript:ENSBTAT00000014517	CSRNP2	69.543	83.6289	0.224312	0.616394	1.45835
transcript:ENSBTAT00000005407	C15H11orf87	92.7973	94.8074	0.259227	0.70957	1.45273
transcript:ENSBTAT00000062834	RF00003	100	100	0.391813	1.07102	1.45075
transcript:ENSBTAT00000020036	CFL2	39.7436	68.9291	3.91223	10.6394	1.44336
transcript:ENSBTAT00000010518	gene:ENSBTAG00000047432	94.8905	100	0.236823	0.633044	1.4185
transcript:ENSBTAT00000030411	gene:ENSBTAG00000022460	100	86.4368	0.410699	1.081	1.39621
transcript:ENSBTAT00000056005	gene:ENSBTAG00000039707	92.619	91.0119	0.337154	0.878573	1.38175
transcript:ENSBTAT00000052785	gene:ENSBTAG00000037416	100	50.8475	0.249924	0.645512	1.36896
transcript:ENSBTAT00000006348	CNOT10	41.8636	56.2858	0.359272	0.920519	1.35737
transcript:ENSBTAT00000003129	CYB5B	50.6453	65.7006	0.230507	0.58871	1.35274
transcript:ENSBTAT00000008675	ERRFI1	28.6736	56.8985	0.351759	0.896793	1.35019
transcript:ENSBTAT00000065393	gene:ENSBTAG00000047904	64.0813	75.1616	0.27678	0.700215	1.33906
transcript:ENSBTAT00000062033	RF00009	88.9881	92.2619	0.207317	0.518779	1.32329
transcript:ENSBTAT00000019522	gene:ENSBTAG00000014662	100	98.9648	0.596996	1.45162	1.28187
transcript:ENSBTAT00000057251	SFT2D2	44.4559	66.584	0.343079	0.829702	1.27405
transcript:ENSBTAT00000000160	KMT5A	24.4859	49.0984	0.216525	0.523421	1.27344
transcript:ENSBTAT00000042967	gene:ENSBTAG00000030431	84.0787	98.9267	0.310044	0.748091	1.27074
transcript:ENSBTAT00000018066	CCR2	54.5373	87.5112	0.331525	0.791959	1.25631
transcript:ENSBTAT00000065533	PLA2G2D3	43.5083	37.1777	0.315023	0.748842	1.24921
transcript:ENSBTAT00000022561	RAP2B	82.9312	97.9426	0.217764	0.509421	1.22609
transcript:ENSBTAT00000045869	RND3	40.337	52.0421	0.582589	1.35179	1.21432
transcript:ENSBTAT00000006968	CDC25C	39.0249	49.8451	0.233332	0.538089	1.20546
transcript:ENSBTAT00000028994	DNAJB4	68.9403	59.2241	0.310321	0.710904	1.19589
transcript:ENSBTAT00000034879	METTL7A	52.5598	57.0564	0.276409	0.627231	1.18219
transcript:ENSBTAT00000002277	TUT7	41.2299	35.5583	0.246662	0.559174	1.18076
transcript:ENSBTAT00000004925	DNAJC2	39.9243	29.5537	0.22776	0.513304	1.1723
transcript:ENSBTAT00000011028	FEM1B	53.0159	65.6572	0.968393	2.18013	1.17075
transcript:ENSBTAT00000019241	gene:ENSBTAG00000027396	100	100	0.326317	0.724911	1.15153
transcript:ENSBTAT00000046345	gene:ENSBTAG00000032651	89.2027	89.2027	0.293075	0.648409	1.14563
transcript:ENSBTAT00000030668	DCAF1	53.383	62.5992	0.37789	0.832212	1.13898
transcript:ENSBTAT00000000497	ZBTB18	79.8145	71.1984	0.344066	0.739372	1.10361
transcript:ENSBTAT00000037682	DDX17	40.9568	53.8584	0.278347	0.590485	1.08502
transcript:ENSBTAT00000011007	gene:ENSBTAG00000008359	100	100	0.275727	0.582526	1.07908
transcript:ENSBTAT00000028044	TMEM190	42.3114	55.3964	0.29795	0.627681	1.07496
transcript:ENSBTAT00000010914	KCNJ2	46.6343	79.456	0.488363	1.02703	1.07245
transcript:ENSBTAT00000024401	gene:ENSBTAG00000018340	89.6024	89.6024	0.369329	0.772877	1.06533
transcript:ENSBTAT00000065739	gene:ENSBTAG00000046153	98.3914	71.0456	0.411934	0.859952	1.06184
transcript:ENSBTAT00000064851	gene:ENSBTAG00000048065	100	100	0.259084	0.53357	1.04226
transcript:ENSBTAT00000012510	PHETA2	40.0472	89.1677	0.809632	1.66448	1.03973
transcript:ENSBTAT00000065007	RF00017	100	98.9831	0.281175	0.56671	1.01114

## Sheet: Downregulated in cryo
Downregulated	Gene Name	Coverage Fresh	Cryo	FPKM Fresh	FPKM Cryo	log2(fold_change)
transcript:ENSBTAT00000046263	ARL2BP	15.2887	13.903	0.682183	8.71953e-06	-16.2555
transcript:ENSBTAT00000064587	C11H9orf50	18.7667	18.9674	0.914223	0.000117154	-12.9299
transcript:ENSBTAT00000044397	HSPB1	32.4621	4.16667	0.659059	0.000143766	-12.1625
transcript:ENSBTAT00000050657	ACP1	24.188	11.6324	0.578017	0.000133338	-12.0818
transcript:ENSBTAT00000012544	RPS2	53.7649	66.1157	22.0935	0.0744956	-8.21225
transcript:ENSBTAT00000021587	RPS7	13.0119	26.3682	9.28106	0.0517408	-7.48684
transcript:ENSBTAT00000060546	gene:ENSBTAG00000043567	98.3246	95.7068	99.0111	0.610796	-7.34076
transcript:ENSBTAT00000037020	UBE2F	34.7965	46.5445	3.3042	0.0235189	-7.13433
transcript:ENSBTAT00000005581	EEF2	43.9933	21.0911	1.23354	0.00896279	-7.10464
transcript:ENSBTAT00000034833	HSPB9	100	43.3852	11.5874	0.0926414	-6.96669
transcript:ENSBTAT00000019318	EEF1A1	51.5018	32.126	6.21961	0.0526282	-6.88484
transcript:ENSBTAT00000021268	RPS5	38.716	51.4485	5.97726	0.054622	-6.77386
transcript:ENSBTAT00000026183	RACK1	35.6696	25.8031	6.05247	0.0605932	-6.64222
transcript:ENSBTAT00000063682	SLC25A6	30.1761	12.9039	7.05141	0.0709798	-6.63436
transcript:ENSBTAT00000023094	YBX1	39.4416	37.5162	13.218	0.138896	-6.57235
transcript:ENSBTAT00000017578	CAPZA3	91.3444	60.4052	2.59157	0.0298618	-6.43938
transcript:ENSBTAT00000007950	NMT1	27.078	25.8382	1.24575	0.0144567	-6.42914
transcript:ENSBTAT00000005007	RPL13A	25.8723	10.1277	5.26729	0.0611723	-6.42804
transcript:ENSBTAT00000001668	HNRNPC	43.5453	37.8272	1.94921	0.0235966	-6.36817
transcript:ENSBTAT00000000814	RPS17	34.0209	76.0604	8.21049	0.10253	-6.32335
transcript:ENSBTAT00000026826	RPL7	51.0256	28.5755	2.43777	0.0307901	-6.30695
transcript:ENSBTAT00000012866	RPSA	39.3524	27.3115	5.04036	0.0689625	-6.19157
transcript:ENSBTAT00000024788	RPL29	30.069	65.1954	4.91312	0.0685944	-6.16241
transcript:ENSBTAT00000060540	gene:ENSBTAG00000043570	97.8358	84.6595	29.4808	0.42856	-6.10413
transcript:ENSBTAT00000017905	RPL24	27.3868	13.8389	5.46993	0.0831461	-6.03973
transcript:ENSBTAT00000037367	RPL8	39.4393	45.3917	5.43151	0.085302	-5.99263
transcript:ENSBTAT00000044584	FAM209A	97.8316	84.375	3.87991	0.0633458	-5.93663
transcript:ENSBTAT00000042874	RPS14	39.1148	26.2993	6.11747	0.100242	-5.93137
transcript:ENSBTAT00000026259	RPL31	36.4774	42.6784	7.65472	0.12696	-5.9139
transcript:ENSBTAT00000047600	SPA17	28.6564	32.2484	3.2289	0.0542653	-5.89487
transcript:ENSBTAT00000025292	TNP1	100	87.8173	20.084	0.358021	-5.80986
transcript:ENSBTAT00000047557	FAM229B	35.8101	45.676	3.12762	0.0558921	-5.80628
transcript:ENSBTAT00000009113	ROPN1	33.7275	19.841	1.78165	0.0321494	-5.79228
transcript:ENSBTAT00000029271	NPC2	46.8375	55.6319	2.79101	0.0510639	-5.77234
transcript:ENSBTAT00000016943	KLHDC3	42.8843	13.4725	0.88608	0.01626	-5.76804
transcript:ENSBTAT00000012735	YBX3	40.4404	52.3279	0.953153	0.0175311	-5.76472
transcript:ENSBTAT00000012599	SH3BGRL3	57.0988	25.6173	2.05033	0.0378336	-5.76004
transcript:ENSBTAT00000018406	C25H16orf72	26.281	36.9739	1.77335	0.0328137	-5.75604
transcript:ENSBTAT00000020267	RPL36AL	57.0218	63.7409	5.29588	0.104516	-5.66308
transcript:ENSBTAT00000027662	PCBP2	45.0804	69.9226	1.43921	0.0288751	-5.63931
transcript:ENSBTAT00000065971	BICD2	46.0042	39.3695	0.555645	0.0111964	-5.63305
transcript:ENSBTAT00000007429	TMSB10	51.9288	48.4669	23.1723	0.47067	-5.62154
transcript:ENSBTAT00000043422	LYPD8	47.363	35.5105	0.93522	0.0192391	-5.60319
transcript:ENSBTAT00000063186	CCDC54	91.2266	23.5581	1.26205	0.0264242	-5.57776
transcript:ENSBTAT00000018491	RPS11	22.0806	23.4375	3.56983	0.0758229	-5.55708
transcript:ENSBTAT00000026278	RPS15	27.4614	28.4698	4.73499	0.101374	-5.54561
transcript:ENSBTAT00000008502	RPS9	34.7463	82.3192	5.01917	0.111308	-5.49481
transcript:ENSBTAT00000015716	EEF1G	29.4154	18.0681	4.94145	0.11041	-5.48399
transcript:ENSBTAT00000066011	ATP5PF	17.9223	2.36736	1.90637	0.0435431	-5.45224
transcript:ENSBTAT00000026501	MRPL40	27.1173	15.9841	2.25114	0.0525626	-5.42047
transcript:ENSBTAT00000002160	RPL21	41.2386	49.4417	2.15604	0.0504862	-5.41636
transcript:ENSBTAT00000014581	MORF4L1	31.4667	50.2321	1.0651	0.0264771	-5.3301
transcript:ENSBTAT00000023087	SAT1	60.0066	30.3478	2.57231	0.0645075	-5.31745
transcript:ENSBTAT00000004190	RPL23	36.3907	22.7012	11.3833	0.285812	-5.3157
transcript:ENSBTAT00000028712	PHPT1	46.4681	14.8892	2.80963	0.0713538	-5.29925
transcript:ENSBTAT00000025904	ELP5	42.3949	39.7398	1.06732	0.027322	-5.28778
transcript:ENSBTAT00000018888	RPL35A	45.3833	16.0569	4.73761	0.121331	-5.28714
transcript:ENSBTAT00000063708	SERF2	53.2062	56.7302	15.4244	0.395086	-5.2869
transcript:ENSBTAT00000026358	TPI1	37.0569	14.1793	0.979949	0.0258057	-5.24694
transcript:ENSBTAT00000064237	PABPC1	47.6199	46.465	3.03611	0.0803678	-5.23946
transcript:ENSBTAT00000009998	FKBP4	23.0497	27.6698	0.533439	0.0141855	-5.23284
transcript:ENSBTAT00000031107	CNDP2	37.2251	36.6847	0.56345	0.015006	-5.23068
transcript:ENSBTAT00000014162	NACA	57.5727	79.1818	1.40833	0.0378878	-5.21611
transcript:ENSBTAT00000034356	gene:ENSBTAG00000035206	71.0909	47.6364	6.12118	0.164754	-5.21543
transcript:ENSBTAT00000016978	gene:ENSBTAG00000012775	100	52.9289	10.9564	0.302073	-5.18073
transcript:ENSBTAT00000010480	C1H3orf38	33.5064	41.5439	0.81853	0.0236177	-5.1151
transcript:ENSBTAT00000000791	CCNI	40.6538	48.9013	1.63138	0.0470711	-5.1151
transcript:ENSBTAT00000002573	DAZAP2	54.0765	24.2691	1.12813	0.03256	-5.11469
transcript:ENSBTAT00000055086	RPLP0	47.3736	42.9138	6.31144	0.183248	-5.1061
transcript:ENSBTAT00000025926	SLC25A39	37.544	14.7007	0.669001	0.0194512	-5.10408
transcript:ENSBTAT00000008907	PHGDH	35.2666	21.3363	0.55769	0.0164316	-5.08492
transcript:ENSBTAT00000027850	RPL11	20.1574	11.7844	4.76871	0.141569	-5.07402
transcript:ENSBTAT00000045249	ABHD16B	85.3325	21.1995	0.594309	0.0177086	-5.06869
transcript:ENSBTAT00000010159	ARF1	23.3623	14.2034	0.563605	0.0168824	-5.06109
transcript:ENSBTAT00000053663	SLC25A3	43.8418	39.4189	0.805707	0.0241669	-5.05915
transcript:ENSBTAT00000022087	gene:ENSBTAG00000016603	21.3532	40.6543	0.885889	0.0265835	-5.05853
transcript:ENSBTAT00000027964	RUVBL1	10.5399	24.624	0.603583	0.0186745	-5.01441
transcript:ENSBTAT00000036655	TBATA	44.6535	26.777	0.809305	0.0260599	-4.95678
transcript:ENSBTAT00000022579	FUNDC2	14.9502	20.224	1.04347	0.0340816	-4.93625
transcript:ENSBTAT00000007948	BZW1	47.1027	36.8494	1.03495	0.0339078	-4.93181
transcript:ENSBTAT00000019814	GABARAP	57.0984	39.3264	2.69341	0.0896362	-4.90921
transcript:ENSBTAT00000015875	RPS19	25.0033	11.0418	5.6583	0.18987	-4.89729
transcript:ENSBTAT00000003962	RPS3	31.0729	25.5668	5.19733	0.176581	-4.87937
transcript:ENSBTAT00000023213	ATF4	70.0765	17.1606	0.650895	0.0223983	-4.86097
transcript:ENSBTAT00000061268	MPHOSPH8	53.9647	60.8149	0.57575	0.0200817	-4.84149
transcript:ENSBTAT00000008386	GPI	25.1024	14.3524	0.82047	0.0286669	-4.83899
transcript:ENSBTAT00000004476	ODF1	47.997	36.3387	6.29039	0.220065	-4.83714
transcript:ENSBTAT00000022959	TXNDC2	91.9164	39.6004	1.66371	0.0585447	-4.82872
transcript:ENSBTAT00000013464	PCMT1	43.8805	43.2534	0.936596	0.0332164	-4.81746
transcript:ENSBTAT00000047094	PROCA1	34.4416	17.7639	5.40444	0.192426	-4.81177
transcript:ENSBTAT00000004728	gene:ENSBTAG00000024657	34.5944	26.0775	1.3743	0.0490531	-4.8082
transcript:ENSBTAT00000026698	LPCAT4	71.866	58.561	0.854771	0.0310069	-4.78488
transcript:ENSBTAT00000024656	OAZ1	36.2942	33.239	3.04111	0.111018	-4.77573
transcript:ENSBTAT00000043319	TEX33	52.1029	52.1868	0.781081	0.0287404	-4.76432
transcript:ENSBTAT00000055723	UBE2D2	30.433	32.5372	0.899788	0.0334448	-4.74973
transcript:ENSBTAT00000005555	ARPC1A	26.9823	43.7605	1.13829	0.0424006	-4.74664
transcript:ENSBTAT00000024572	VIM	42.1816	25.1576	0.852674	0.0322611	-4.72412
transcript:ENSBTAT00000008132	ACTG1	67.3455	56.0744	1.605	0.0613814	-4.70863
transcript:ENSBTAT00000019499	EEF1D	24.4856	9.95656	0.774317	0.0296209	-4.70824
transcript:ENSBTAT00000004433	PHKG2	35.0265	36.0099	1.43574	0.0562254	-4.67443
transcript:ENSBTAT00000024107	PEBP1	39.117	29.5806	2.30146	0.0902808	-4.67199
transcript:ENSBTAT00000004418	SF3B6	42.3768	46.0961	1.23454	0.0487841	-4.66142
transcript:ENSBTAT00000021166	GAPDHS	42.8555	49.4314	1.65525	0.0661333	-4.64553
transcript:ENSBTAT00000037753	GAPDH	35.6057	16.3806	0.793015	0.0320196	-4.63032
transcript:ENSBTAT00000036839	BTF3	59.7341	44.3154	2.07374	0.0840823	-4.62429
transcript:ENSBTAT00000055320	EIF4G2	49.8648	30.0406	1.30408	0.0536061	-4.60449
transcript:ENSBTAT00000019134	EIF3I	53.3514	50.116	1.29075	0.0531375	-4.60234
transcript:ENSBTAT00000002616	EIF5A	37.8667	47.7128	1.20907	0.0499739	-4.59659
transcript:ENSBTAT00000002725	INSIG2	43.0364	54.0846	2.03604	0.0843503	-4.59323
transcript:ENSBTAT00000024541	PRSS37	43.8523	7.64041	0.901029	0.038106	-4.56348
transcript:ENSBTAT00000020371	GSDME	48.5744	50.114	1.01058	0.0428117	-4.56104
transcript:ENSBTAT00000009643	ATP5MG	52.5338	76.433	2.51589	0.107423	-4.54969
transcript:ENSBTAT00000006781	RPL37	39.2157	60.0538	8.40544	0.362547	-4.53508
transcript:ENSBTAT00000037464	PRM2	83.3333	46.7742	9.63741	0.418354	-4.52585
transcript:ENSBTAT00000018256	CPLX2	56.3861	45.3465	2.63627	0.116013	-4.50615
transcript:ENSBTAT00000044049	NOVA1	43.6031	24.9447	1.10274	0.0486939	-4.50121
transcript:ENSBTAT00000008609	HDGF	18.8919	12.2276	0.759334	0.0342581	-4.47022
transcript:ENSBTAT00000060569	COX1	99.2233	67.5081	1.73061	0.0787933	-4.45707
transcript:ENSBTAT00000016356	CETN1	91.8736	26.9752	0.88416	0.0403119	-4.45503
transcript:ENSBTAT00000024509	POLG2	38.1979	45.2214	0.852003	0.0394828	-4.43156
transcript:ENSBTAT00000012835	FBP1	33.7582	27.1156	1.07203	0.0501666	-4.41747
transcript:ENSBTAT00000065799	gene:ENSBTAG00000048229	22.6654	13.8076	2.99874	0.143467	-4.38557
transcript:ENSBTAT00000035769	RAB15	30.926	13.6477	0.531706	0.0257852	-4.36601
transcript:ENSBTAT00000055681	QDPR	37.2421	85.1179	0.977509	0.0476774	-4.35773
transcript:ENSBTAT00000026444	CABS1	96.4644	29.9092	1.28003	0.0627824	-4.34967
transcript:ENSBTAT00000054840	RPS26	45.3926	29.9749	2.52469	0.1241	-4.34653
transcript:ENSBTAT00000003431	RPS18	15.5184	12.1271	5.19713	0.255803	-4.34461
transcript:ENSBTAT00000003201	RPS28	47.3963	72.1977	14.2698	0.704897	-4.33941
transcript:ENSBTAT00000021328	MYL12A	40.5065	51.4873	0.852517	0.0423778	-4.33035
transcript:ENSBTAT00000063855	PHF7	39.4455	53.9997	1.05518	0.0525622	-4.32732
transcript:ENSBTAT00000010670	OSR1	26.5211	16.5493	2.75904	0.137476	-4.32692
transcript:ENSBTAT00000013402	TPT1	32.0542	40.9989	10.3919	0.521868	-4.31563
transcript:ENSBTAT00000009152	RPL12	34.375	15.1575	2.84857	0.143865	-4.30745
transcript:ENSBTAT00000001518	CLTA	24.6364	26.8069	0.592838	0.0300557	-4.30192
transcript:ENSBTAT00000042547	RPL38	15.8939	13.9102	4.89692	0.248441	-4.3009
transcript:ENSBTAT00000005600	RHOA	20.6337	36.9691	0.900912	0.0459066	-4.29461
transcript:ENSBTAT00000002666	RPL19	37.8486	50.0285	6.15863	0.316802	-4.28096
transcript:ENSBTAT00000065893	MRFAP1L1	76	41.2857	1.49713	0.0772934	-4.27571
transcript:ENSBTAT00000025963	RPL10A	75.7929	60.4175	2.10289	0.10947	-4.26377
transcript:ENSBTAT00000017822	DBIL5	89.9917	75.4796	15.8953	0.840787	-4.24071
transcript:ENSBTAT00000024514	DDX5	63.2572	84.688	2.21018	0.117486	-4.23361
transcript:ENSBTAT00000016242	TUBA1B	61.2921	88.4433	1.64751	0.0875996	-4.23322
transcript:ENSBTAT00000014907	CITED2	75.5853	38.7124	0.862842	0.0460076	-4.22915
transcript:ENSBTAT00000027627	RPS15A	33.6596	27.3055	2.11365	0.11421	-4.20997
transcript:ENSBTAT00000032452	SOD1	31.633	33.0756	1.55832	0.0844849	-4.20516
transcript:ENSBTAT00000020184	UBXN4	42.8785	46.9684	0.732817	0.0398835	-4.19959
transcript:ENSBTAT00000019818	MEX3C	39.6523	14.4146	0.666581	0.0364339	-4.19343
transcript:ENSBTAT00000012000	SERP1	33.3479	37.5548	1.6289	0.0899408	-4.17877
transcript:ENSBTAT00000010949	SDHB	13.8718	23.3009	0.648168	0.0358354	-4.17691
transcript:ENSBTAT00000018376	ALLC	27.9879	19.5554	2.21751	0.124265	-4.15746
transcript:ENSBTAT00000040344	CPNE2	35.0112	14.7611	0.787973	0.0449231	-4.13262
transcript:ENSBTAT00000005441	SPATA20	25.397	9.20345	0.569819	0.0328767	-4.11537
transcript:ENSBTAT00000017770	RPS23	30.4301	50.8065	2.35712	0.136135	-4.11391
transcript:ENSBTAT00000028498	S100A14	62.7918	49.0759	0.565999	0.0332257	-4.09043
transcript:ENSBTAT00000010706	SMPD2	48.8754	12.8267	0.5951	0.0354656	-4.06864
transcript:ENSBTAT00000002978	REEP6	26.3978	10.1925	0.984403	0.0588093	-4.06513
transcript:ENSBTAT00000063269	gene:ENSBTAG00000045773	98.3333	20.9722	1.55268	0.0946006	-4.03677
transcript:ENSBTAT00000026489	gene:ENSBTAG00000019881	44.9924	31.0855	5.68222	0.348904	-4.02555
transcript:ENSBTAT00000002626	RPL5	45.2744	13.8096	1.66182	0.102245	-4.02266
transcript:ENSBTAT00000016549	ILF2	37.6662	33.2036	1.86773	0.115183	-4.01929
transcript:ENSBTAT00000063089	gene:ENSBTAG00000046486	33.7024	36.4173	1.51872	0.0942685	-4.00993
transcript:ENSBTAT00000024376	RPLP1	23.9777	41.2175	14.024	0.871873	-4.00764
transcript:ENSBTAT00000024127	KIF5C	40.1622	40.2955	6.1301	0.389183	-3.97739
transcript:ENSBTAT00000012912	GKAP1	38.6928	30.2851	0.598409	0.0384814	-3.9589
transcript:ENSBTAT00000004739	CISD1	48.4762	61.6735	0.782649	0.0507487	-3.94692
transcript:ENSBTAT00000006363	ARL2BP	14.9829	15.9675	1.05573	0.0688315	-3.93903
transcript:ENSBTAT00000015944	CYB5A	25.8075	31.7634	0.577658	0.0378336	-3.93248
transcript:ENSBTAT00000027520	TSSK3	72.4379	44.6849	0.636318	0.0419744	-3.92217
transcript:ENSBTAT00000046842	LELP1	67.6806	18.2932	3.06218	0.206527	-3.89015
transcript:ENSBTAT00000056434	TMEM225B	21.97	22.9789	2.3216	0.157614	-3.88066
transcript:ENSBTAT00000007220	CCNY	29.1239	33.2658	0.912079	0.0625377	-3.86636
transcript:ENSBTAT00000013707	ARPC2	44.1017	41.071	1.31604	0.0906891	-3.85914
transcript:ENSBTAT00000006666	FAM204A	46.3228	39.1173	0.625922	0.0431377	-3.85896
transcript:ENSBTAT00000004247	MGC137055	100	89.7623	23.921	1.64948	-3.85819
transcript:ENSBTAT00000010176	UBA52	37.4423	28.847	7.34461	0.506867	-3.85701
transcript:ENSBTAT00000008373	gene:ENSBTAG00000006383	92.7044	56.2264	1.35535	0.0935993	-3.85602
transcript:ENSBTAT00000006465	PFN1	30.5564	20.3308	1.91588	0.133743	-3.84047
transcript:ENSBTAT00000051953	SRSF3	79.8265	82.9563	0.526928	0.0368844	-3.83652
transcript:ENSBTAT00000034695	H3F3B	60.4377	71.6049	3.37833	0.23727	-3.83171
transcript:ENSBTAT00000045121	LAMP1	32.7876	29.7552	0.990655	0.0709249	-3.80402
transcript:ENSBTAT00000024975	DNAJB3	94.2466	47.1233	1.67462	0.120266	-3.79953
transcript:ENSBTAT00000008319	ATP5IF1	39.082	54.4563	1.62799	0.117161	-3.79652
transcript:ENSBTAT00000009803	RPL10	30.3851	19.0436	2.99953	0.216701	-3.79095
transcript:ENSBTAT00000008774	SYNCRIP	39.3926	32.5149	0.610003	0.0446436	-3.77229
transcript:ENSBTAT00000010035	THAP1	41.7724	42.374	3.89599	0.287303	-3.76135
transcript:ENSBTAT00000009779	TEKT1	42.5804	35.7515	0.898895	0.0663582	-3.75981
transcript:ENSBTAT00000046692	PRM1	100	98.8048	302.628	22.4999	-3.74956
transcript:ENSBTAT00000006500	TEX35	67.0252	65.1163	1.01973	0.0759321	-3.74734
transcript:ENSBTAT00000038641	C2H2orf88	40.2675	32.9732	1.99277	0.150788	-3.72418
transcript:ENSBTAT00000004161	RPL35	32.756	17.2548	4.3622	0.331107	-3.71969
transcript:ENSBTAT00000013231	CHCHD2	34.9948	24.554	5.08756	0.388685	-3.7103
transcript:ENSBTAT00000053702	SPERT	24.7634	19.4762	1.36847	0.105332	-3.69955
transcript:ENSBTAT00000006960	CLDN2	63.1086	25.4682	0.558277	0.0433727	-3.68612
transcript:ENSBTAT00000043721	MS4A13	23.7611	19.3258	2.27273	0.177939	-3.67497
transcript:ENSBTAT00000012602	UBXN11	16.7608	4.67671	0.727586	0.0570055	-3.67394
transcript:ENSBTAT00000010767	UBXN6	33.5875	57.9017	1.74025	0.137722	-3.65946
transcript:ENSBTAT00000006198	GSG1	44.7624	69.0008	3.42755	0.276449	-3.63209
transcript:ENSBTAT00000025484	RPS20	38.0417	54.1734	5.29742	0.429693	-3.62391
transcript:ENSBTAT00000036647	FAM205C	76.8756	35.5858	1.08605	0.0884776	-3.61764
transcript:ENSBTAT00000008984	JOSD2	23.8634	21.8667	0.583289	0.047901	-3.60608
transcript:ENSBTAT00000029003	NDUFB2	38.604	22.1154	1.0805	0.0894937	-3.59376
transcript:ENSBTAT00000021485	CYB5R2	40.526	26.5973	1.58451	0.133035	-3.57415
transcript:ENSBTAT00000025235	RAB11A	40.4758	40.8446	0.894814	0.0752369	-3.57208
transcript:ENSBTAT00000008696	HMGN1	40.8948	9.93721	0.647651	0.0546492	-3.56694
transcript:ENSBTAT00000046490	OAZ3	49.0394	27.9713	4.83811	0.410982	-3.55729
transcript:ENSBTAT00000005983	CAPZB	12.5265	30.4713	1.33709	0.113982	-3.55222
transcript:ENSBTAT00000042557	ST6GALNAC2	22.5027	16.3603	2.80511	0.2428	-3.53022
transcript:ENSBTAT00000036270	DNAJB1	40.462	29.1576	0.605544	0.0524385	-3.52953
transcript:ENSBTAT00000045004	SPEM1	76.8692	20.405	3.53368	0.306897	-3.52535
transcript:ENSBTAT00000010807	C15H11orf71	75.4579	54.5788	3.99649	0.349955	-3.51349
transcript:ENSBTAT00000014877	RPS6	38.7835	40.7106	3.02313	0.266358	-3.5046
transcript:ENSBTAT00000020452	RPL18	45.3773	21.6259	5.67171	0.500702	-3.50176
transcript:ENSBTAT00000019980	LAMTOR4	25.2714	59.4089	0.74872	0.0663995	-3.49518
transcript:ENSBTAT00000009961	ATP6V1F	29.2956	18.1513	1.49877	0.13307	-3.49353
transcript:ENSBTAT00000063539	GON7	32.1169	18.4382	0.752038	0.0671948	-3.48438
transcript:ENSBTAT00000028744	DCAF12	42.5593	31.0021	1.37427	0.12309	-3.48088
transcript:ENSBTAT00000013883	SELENOV	50.7814	77.6412	0.890428	0.0798811	-3.47857
transcript:ENSBTAT00000042554	SUMO2	13.6778	15.786	0.87269	0.0788068	-3.46908
transcript:ENSBTAT00000024937	C13H20orf27	16.8892	14.2342	0.539821	0.048986	-3.46204
transcript:ENSBTAT00000017277	RNF11	33.9564	17.134	0.981418	0.0911571	-3.42844
transcript:ENSBTAT00000007155	SMCP	76.5463	27.9485	5.98382	0.555994	-3.42792
transcript:ENSBTAT00000000289	YWHAZ	31.2243	30.3474	20.5224	1.90846	-3.42672
transcript:ENSBTAT00000018807	C11H9orf16	19.8294	16.2989	0.740076	0.0693094	-3.41655
transcript:ENSBTAT00000014270	NDUFAF1	66.7786	76.3224	0.555004	0.0520173	-3.41544
transcript:ENSBTAT00000031716	TES	48.5222	28.2746	0.642029	0.0610779	-3.39392
transcript:ENSBTAT00000013127	PGP	95.8079	44.4541	1.32703	0.126308	-3.39318
transcript:ENSBTAT00000033359	RPL6	60.7172	61.1654	1.92592	0.184679	-3.38246
transcript:ENSBTAT00000043432	SPATA3	29.873	16.3117	1.67034	0.160925	-3.37568
transcript:ENSBTAT00000007054	VRK3	27.1968	40.4956	0.630481	0.0607496	-3.37551
transcript:ENSBTAT00000005015	RPL37A	39.4275	28.7786	2.99786	0.292613	-3.35687
transcript:ENSBTAT00000014919	GTSF1L	100	97.1047	23.7651	2.33026	-3.35028
transcript:ENSBTAT00000027749	KRT24	68.8382	40.428	0.911977	0.0904727	-3.33344
transcript:ENSBTAT00000006003	PRRX1	34.1097	28.7789	0.702023	0.070244	-3.32107
transcript:ENSBTAT00000011824	PCBP1	97.4898	60.5834	2.0845	0.209027	-3.31794
transcript:ENSBTAT00000019577	CLPP	48.6605	86.0314	1.31136	0.131909	-3.31345
transcript:ENSBTAT00000000276	POLB	27.7006	18.1272	1.19603	0.120505	-3.31108
transcript:ENSBTAT00000036068	CCDC32	56.6995	46.351	1.48736	0.149884	-3.31084
transcript:ENSBTAT00000018110	LMNB2	24.5197	27.0924	0.604047	0.0608891	-3.3104
transcript:ENSBTAT00000004188	RPL3	28.0632	15.6031	1.96092	0.198678	-3.30303
transcript:ENSBTAT00000035773	IZUMO4	30.9268	4.84553	1.10228	0.113237	-3.28307
transcript:ENSBTAT00000042556	JPT1	32.4126	57.0133	0.823652	0.0848689	-3.27873
transcript:ENSBTAT00000030549	SLFNL1	39.9208	40.4297	0.744281	0.0774741	-3.26406
transcript:ENSBTAT00000020150	S100A10	36.7569	31.2511	1.2788	0.133476	-3.26014
transcript:ENSBTAT00000002805	CRISP2	33.5735	30.8384	1.55222	0.162834	-3.25286
transcript:ENSBTAT00000010595	ZNF706	40.9096	66.0594	4.97202	0.526933	-3.23814
transcript:ENSBTAT00000028162	HNRNPK	49.2483	55.0307	1.03438	0.110153	-3.23119
transcript:ENSBTAT00000061045	SRPK2	42.0356	43.1132	3.56581	0.381103	-3.22598
transcript:ENSBTAT00000061860	RF00009	100	100	23.3984	2.50214	-3.22518
transcript:ENSBTAT00000021120	NSUN4	50.4652	29.2797	0.978707	0.104848	-3.22258
transcript:ENSBTAT00000056576	ATP5F1E	15.1138	14.8158	1.41752	0.152951	-3.21223
transcript:ENSBTAT00000008809	EIF3E	41.4635	32.4881	0.94844	0.103299	-3.19874
transcript:ENSBTAT00000000438	HMGB4	100	97.5172	47.0802	5.15611	-3.19076
transcript:ENSBTAT00000047341	TCIM	95.6956	39.8155	0.655496	0.0718557	-3.18941
transcript:ENSBTAT00000056338	SPATA6	39.6328	31.6515	0.916746	0.100514	-3.18912
transcript:ENSBTAT00000012357	HNRNPH1	44.6284	37.3514	0.756557	0.0830851	-3.18679
transcript:ENSBTAT00000047320	RPL13	35.6845	27.7546	5.30621	0.585958	-3.17881
transcript:ENSBTAT00000063918	CYLC1	35.7028	31.2667	0.786466	0.0873968	-3.16973
transcript:ENSBTAT00000021401	PTMA	100	57.2852	1.22446	0.136519	-3.16497
transcript:ENSBTAT00000011403	PRDX5	42.2322	65.1656	1.06561	0.119294	-3.15909
transcript:ENSBTAT00000043256	SWI5	52.5786	73.8686	2.55589	0.286906	-3.15518
transcript:ENSBTAT00000016378	RPL26	9.87755	23.9388	1.65748	0.188537	-3.13608
transcript:ENSBTAT00000026288	ANKEF1	34.9625	40.8451	0.553332	0.0629619	-3.13559
transcript:ENSBTAT00000035230	AGPAT2	18.0313	7.77136	0.732156	0.0840236	-3.12328
transcript:ENSBTAT00000031754	RPL28	19.4068	12.4863	3.31946	0.381087	-3.12276
transcript:ENSBTAT00000023581	CA2	45.4277	38.3158	0.976344	0.113016	-3.11086
transcript:ENSBTAT00000006853	SCP2D1	99.4366	92.8169	16.8498	1.95851	-3.1049
transcript:ENSBTAT00000011803	RAP1B	43.3118	53.1709	0.638525	0.0742301	-3.10467
transcript:ENSBTAT00000008122	DNAJB8	100	55.0287	3.71124	0.432325	-3.10171
transcript:ENSBTAT00000009127	SPAG4	39.6728	42.7752	1.98124	0.231214	-3.0991
transcript:ENSBTAT00000002020	BRI3BP	30.3296	75.8121	0.988633	0.115585	-3.09649
transcript:ENSBTAT00000002642	RPL14	54.2656	48.1677	2.26289	0.266976	-3.08339
transcript:ENSBTAT00000035306	SKP1	28.2349	28.21	0.615467	0.0726548	-3.08255
transcript:ENSBTAT00000005558	LYPLA1	37.5144	49.6363	0.904424	0.106889	-3.08089
transcript:ENSBTAT00000020325	ODF2	44.6667	50.2879	1.8881	0.223175	-3.08069
transcript:ENSBTAT00000054038	AK1	18.3293	13.6397	1.42641	0.169415	-3.07375
transcript:ENSBTAT00000063234	gene:ENSBTAG00000046651	89.5966	24.2038	0.614179	0.0742865	-3.04749
transcript:ENSBTAT00000023720	BAG1	46.6018	55.7292	1.30848	0.158929	-3.04143
transcript:ENSBTAT00000001128	PPP1R2	37.0578	35.5911	1.75084	0.213569	-3.03527
transcript:ENSBTAT00000034274	DYNLL1	60.4107	82.5051	0.500469	0.0611723	-3.03233
transcript:ENSBTAT00000060549	MT-CO2	89.9123	36.2573	0.949853	0.11644	-3.02811
transcript:ENSBTAT00000017500	HSPA1A	96.1578	53.5826	0.744879	0.0916211	-3.02325
transcript:ENSBTAT00000001878	gene:ENSBTAG00000001432	99.5798	38.0952	0.886398	0.109244	-3.0204
transcript:ENSBTAT00000020326	RPS8	33.3649	46.9001	3.68126	0.456658	-3.01101
transcript:ENSBTAT00000004732	PRSS58	58.9376	23.1546	1.39158	0.1734	-3.00454
transcript:ENSBTAT00000064247	gene:ENSBTAG00000046373	100	63.2911	2.4948	0.310887	-3.00446
transcript:ENSBTAT00000028093	RPS16	29.1447	31.2525	3.71839	0.467202	-2.99256
transcript:ENSBTAT00000011581	gene:ENSBTAG00000008789	54.1864	54.4497	0.724322	0.0913157	-2.9877
transcript:ENSBTAT00000027728	gene:ENSBTAG00000020807	38.7442	28.5905	0.943852	0.119211	-2.98504
transcript:ENSBTAT00000013888	GPS2	25.9146	58.8415	0.643599	0.081538	-2.98062
transcript:ENSBTAT00000061276	HAND2	34.3155	22.0762	5.08479	0.644206	-2.98059
transcript:ENSBTAT00000029308	RASSF8	37.882	35.3396	0.674489	0.085503	-2.97975
transcript:ENSBTAT00000012170	RAC1	14.137	26.1121	0.622437	0.0791764	-2.97478
transcript:ENSBTAT00000026466	CCDC70	32.9298	31.5445	2.73209	0.349288	-2.96752
transcript:ENSBTAT00000022908	GATA3	63.5476	79.9826	4.37181	0.562663	-2.95789
transcript:ENSBTAT00000036093	gene:ENSBTAG00000025595	100	75.3571	1.83554	0.239735	-2.93669
transcript:ENSBTAT00000064198	TEX50	60.1269	47.5939	6.87378	0.899549	-2.93383
transcript:ENSBTAT00000001970	GRK4	15.6179	9.83149	0.673386	0.0881369	-2.93362
transcript:ENSBTAT00000021896	GSTM1	49.0426	22.9939	3.31842	0.435049	-2.93125
transcript:ENSBTAT00000017002	DCUN1D1	35.868	37.7842	2.38244	0.314189	-2.92274
transcript:ENSBTAT00000018284	STMN1	21.4532	10.5177	0.778279	0.102987	-2.91783
transcript:ENSBTAT00000021327	EIF4A3	32.9133	27.039	2.30686	0.308131	-2.90431
transcript:ENSBTAT00000003305	PTMA	26.5785	22.3362	1.59638	0.214497	-2.89577
transcript:ENSBTAT00000006516	TOX	39.8242	30.7409	0.874403	0.117993	-2.8896
transcript:ENSBTAT00000022448	OSER1	40.9502	34.6785	1.50085	0.203345	-2.88378
transcript:ENSBTAT00000011131	SLU7	30.2867	31.7103	0.619726	0.0843965	-2.87637
transcript:ENSBTAT00000010166	gene:ENSBTAG00000027610	95.6835	55.8753	1.0111	0.138449	-2.86849
transcript:ENSBTAT00000002607	CIAO2A	40.5842	34.4563	0.602303	0.0827673	-2.86336
transcript:ENSBTAT00000023638	CHD2	30.882	44.1916	0.969802	0.133764	-2.85799
transcript:ENSBTAT00000020202	STARD10	26.5913	40.0144	0.918849	0.128778	-2.83495
transcript:ENSBTAT00000008920	CCDC174	34.3966	31.8942	14.4685	2.03982	-2.8264
transcript:ENSBTAT00000047947	SSR2	82.1722	56.6778	1.29504	0.184386	-2.81219
transcript:ENSBTAT00000026400	gene:ENSBTAG00000023274	100	100	1.26287	0.181023	-2.80246
transcript:ENSBTAT00000044904	ARRDC5	45.5644	48.8036	0.875585	0.126044	-2.79632
transcript:ENSBTAT00000023182	C17H5orf52	38.0521	23.6802	1.279	0.184424	-2.79392
transcript:ENSBTAT00000005324	CAPZA2	50.1064	52.3784	0.933021	0.134718	-2.79196
transcript:ENSBTAT00000021397	COX4I1	23.7791	19.9778	2.08929	0.302909	-2.78606
transcript:ENSBTAT00000008954	FAM181B	49.8378	49.0811	3.12322	0.454732	-2.77995
transcript:ENSBTAT00000045775	IQCF2	68.0371	54.9735	3.87093	0.568663	-2.76703
transcript:ENSBTAT00000030275	EIF5	52.4316	45.7434	0.946383	0.139503	-2.76212
transcript:ENSBTAT00000028244	C5H12orf45	52.8089	77.8382	0.841752	0.124375	-2.7587
transcript:ENSBTAT00000019184	gene:ENSBTAG00000014423	46.7151	61.2568	0.932925	0.13834	-2.75354
transcript:ENSBTAT00000021909	CALU	37.8852	38.5977	1.39718	0.207652	-2.75028
transcript:ENSBTAT00000026716	C25H16orf82	100	63.2961	3.131	0.466429	-2.74689
transcript:ENSBTAT00000021793	UBL4B	46.0012	25.8524	0.623754	0.0930389	-2.74507
transcript:ENSBTAT00000036194	CALM1	27.6871	51.2943	1.81586	0.271228	-2.74307
transcript:ENSBTAT00000057012	IQCF5	50.8448	17.6346	1.23184	0.184012	-2.74295
transcript:ENSBTAT00000022345	CSNK1G2	34.354	42.6235	0.66407	0.0992114	-2.74276
transcript:ENSBTAT00000064235	ANKRD66	41.7785	42.0528	0.759989	0.114578	-2.72965
transcript:ENSBTAT00000025932	ACTL7B	80.4549	17.1997	0.572371	0.0872903	-2.71306
transcript:ENSBTAT00000024529	UBE2J1	35.8079	19.4823	0.690556	0.105951	-2.70437
transcript:ENSBTAT00000008194	WDR83OS	39.2326	57.8686	0.807835	0.124642	-2.69627
transcript:ENSBTAT00000065039	gene:ENSBTAG00000046623	100	99.7701	0.816889	0.12696	-2.68577
transcript:ENSBTAT00000006990	gene:ENSBTAG00000005315	99.5104	94.6144	1.15816	0.180188	-2.68426
transcript:ENSBTAT00000019050	ANTXR2	38.61	29.4559	0.762201	0.1187	-2.68285
transcript:ENSBTAT00000060566	COX3	94.4942	72.8553	2.97441	0.463522	-2.68189
transcript:ENSBTAT00000009334	THTPA	47.3538	50.6552	1.81447	0.286216	-2.66437
transcript:ENSBTAT00000009600	gene:ENSBTAG00000007296	95.4301	100	3.27199	0.516808	-2.66247
transcript:ENSBTAT00000009747	CEP41	32.7531	17.293	0.994666	0.157324	-2.66047
transcript:ENSBTAT00000049077	BCL2L11	33.3481	51.5652	0.510835	0.0812426	-2.65255
transcript:ENSBTAT00000000901	CSDE1	55.0654	69.3335	1.27111	0.202159	-2.65253
transcript:ENSBTAT00000060539	MT-ATP6	97.6505	94.2731	2.48437	0.396075	-2.64903
transcript:ENSBTAT00000028602	CFL1	48.4195	47.74	4.02313	0.644773	-2.64146
transcript:ENSBTAT00000010077	CTNNBL1	45.1889	49.47	0.588169	0.094965	-2.63076
transcript:ENSBTAT00000019944	C19orf71	18.2331	24.2699	1.82565	0.296705	-2.62131
transcript:ENSBTAT00000028246	APOPT1	23.8917	42.3032	9.05762	1.48051	-2.61304
transcript:ENSBTAT00000021600	RNASEH1	50.6747	54.7786	1.24143	0.203077	-2.61191
transcript:ENSBTAT00000033556	FAM71F2	60.8901	61.6595	1.05529	0.172873	-2.60985
transcript:ENSBTAT00000000704	NKX2-1	41.5828	46.7178	3.38885	0.556011	-2.60761
transcript:ENSBTAT00000055329	PAFAH1B1	40.0353	39.0326	1.04958	0.17361	-2.5959
transcript:ENSBTAT00000003974	ADRM1	45.2153	92.8534	0.54264	0.0897843	-2.59546
transcript:ENSBTAT00000023746	YPEL1	22.0303	15.0678	0.725157	0.120319	-2.59143
transcript:ENSBTAT00000020322	KIF2C	34.4417	32.4936	0.543369	0.0902952	-2.58921
transcript:ENSBTAT00000022373	ZCCHC17	31.4352	26.4736	0.791291	0.131621	-2.58781
transcript:ENSBTAT00000010815	PAIP2	34.0679	53.0391	0.783949	0.13165	-2.57406
transcript:ENSBTAT00000048862	C23H6orf106	37.8839	40.9098	0.97624	0.164088	-2.57276
transcript:ENSBTAT00000045066	gene:ENSBTAG00000031786	100	100	5.02697	0.846594	-2.56995
transcript:ENSBTAT00000061075	HILS1	87.5	69.2518	3.32997	0.560937	-2.5696
transcript:ENSBTAT00000012845	PDRG1	43.0922	52.2473	0.526739	0.0888627	-2.56744
transcript:ENSBTAT00000016534	ELF5	48.2518	43.6667	0.57555	0.0980453	-2.55342
transcript:ENSBTAT00000000925	UBE2R2	43.8228	49.8118	10.4833	1.79514	-2.54592
transcript:ENSBTAT00000044026	PLCD4	42.0554	36.5799	0.661462	0.113429	-2.54387
transcript:ENSBTAT00000008150	DNAJB7	97.5495	87.3704	4.99061	0.860829	-2.53542
transcript:ENSBTAT00000022919	UBB	62.6976	66.4384	2.28832	0.394795	-2.53512
transcript:ENSBTAT00000025854	IGF2BP3	43.8989	40.1224	1.0122	0.175278	-2.52978
transcript:ENSBTAT00000002225	TRA2B	55.5499	70.1229	2.39679	0.415584	-2.52789
transcript:ENSBTAT00000007442	YWHAE	35.0874	39.5965	1.67538	0.291645	-2.5222
transcript:ENSBTAT00000065735	gene:ENSBTAG00000007966	34.6442	46.5595	0.524786	0.0915212	-2.51955
transcript:ENSBTAT00000054025	TNP2	99.2188	98.8932	26.8838	4.69005	-2.51906
transcript:ENSBTAT00000064948	gene:ENSBTAG00000047507	81.1475	37.2951	1.04661	0.18418	-2.50653
transcript:ENSBTAT00000028520	PSME1	38.5424	24.3802	0.582524	0.102774	-2.50284
transcript:ENSBTAT00000031634	CABYR	48.871	35.7664	0.991567	0.17545	-2.49865
transcript:ENSBTAT00000004410	ACTR3	49.7788	31.4075	0.58165	0.103425	-2.49157
transcript:ENSBTAT00000016937	UBE2M	37.9397	35.3643	1.18763	0.211314	-2.49063
transcript:ENSBTAT00000028220	NRDC	44.5787	38.6003	0.937899	0.167119	-2.48855
transcript:ENSBTAT00000022161	SLC2A4RG	50.9103	77.4444	0.681622	0.121658	-2.48614
transcript:ENSBTAT00000027310	C23H6orf62	54.7394	67.471	1.61869	0.290461	-2.47841
transcript:ENSBTAT00000056243	gene:ENSBTAG00000040602	33.0088	26.7157	0.708104	0.127421	-2.47436
transcript:ENSBTAT00000009155	gene:ENSBTAG00000025385	100	92.381	1.46621	0.264155	-2.47263
transcript:ENSBTAT00000056280	KCNMB1	51.3374	63.8399	1.24582	0.226088	-2.46214
transcript:ENSBTAT00000055282	gene:ENSBTAG00000038146	29.6491	38.6564	0.542825	0.0986765	-2.45971
transcript:ENSBTAT00000008072	MAP1LC3A	54.4794	55.0847	1.34702	0.246352	-2.45097
transcript:ENSBTAT00000012026	YBX2	31.9574	40.4627	1.90494	0.348484	-2.45058
transcript:ENSBTAT00000065567	MPG	18.9405	3.95911	0.601495	0.1102	-2.44843
transcript:ENSBTAT00000010932	MKRN1	44.1183	43.7342	1.63184	0.299815	-2.44435
transcript:ENSBTAT00000024505	PSMF1	38.2399	38.2247	0.649753	0.119512	-2.44273
transcript:ENSBTAT00000014299	C26H10orf120	66.4221	32.2107	0.951865	0.175545	-2.43892
transcript:ENSBTAT00000009889	UBE2Q1	36.7731	39.7353	0.596459	0.110079	-2.43788
transcript:ENSBTAT00000038937	TMCO5A	48.7106	25.1894	1.37007	0.253215	-2.43582
transcript:ENSBTAT00000002674	TAGLN2	29.1715	57.7923	1.7984	0.33411	-2.42831
transcript:ENSBTAT00000063487	NPM2	41.3305	32.6644	1.56432	0.296331	-2.40026
transcript:ENSBTAT00000000926	TAF10	49.9647	29.6113	2.24106	0.426281	-2.3943
transcript:ENSBTAT00000006508	FDXACB1	25.5169	25.033	0.583841	0.111343	-2.39057
transcript:ENSBTAT00000026930	WNT5A	22.6474	53.0507	3.29476	0.628813	-2.38947
transcript:ENSBTAT00000024097	SPATA18	33.9788	27.0112	0.883171	0.168729	-2.38799
transcript:ENSBTAT00000045790	CCDC159	45.0196	27.6687	1.00317	0.192064	-2.38491
transcript:ENSBTAT00000043537	SERBP1	48.7034	56.5802	0.521978	0.100055	-2.38319
transcript:ENSBTAT00000052511	TFAM	27.994	45.6223	2.08839	0.402108	-2.37674
transcript:ENSBTAT00000043046	H2AFJ	84.3427	33.8257	0.613803	0.118257	-2.37586
transcript:ENSBTAT00000028456	CCDC34	51.6077	36.5779	1.80295	0.347849	-2.37382
transcript:ENSBTAT00000030664	TCTA	48.1623	73.2316	0.612374	0.118981	-2.36368
transcript:ENSBTAT00000031096	CHIC2	46.6424	43.231	0.964957	0.188102	-2.35895
transcript:ENSBTAT00000015392	HABP4	35.8419	28.6846	0.701821	0.137118	-2.35569
transcript:ENSBTAT00000002119	RUNDC3A	24.9452	17.8746	0.528733	0.104502	-2.33901
transcript:ENSBTAT00000029203	ALDH5A1	39.3597	24.4587	0.951343	0.189837	-2.3252
transcript:ENSBTAT00000020732	CYLC2	70.6595	61.7013	2.29629	0.459383	-2.32154
transcript:ENSBTAT00000022467	TCP11	20.0805	23.5769	0.956775	0.192247	-2.31522
transcript:ENSBTAT00000039634	C15H11orf94	83.2817	23.5294	0.918098	0.18495	-2.31151
transcript:ENSBTAT00000018167	KIF22	34.2788	58.2996	1.30571	0.264045	-2.30598
transcript:ENSBTAT00000014215	CCL14	64.4191	43.2158	2.12163	0.42958	-2.30417
transcript:ENSBTAT00000009615	VPS41	49.9773	51.4508	0.968476	0.199091	-2.28229
transcript:ENSBTAT00000064252	gene:ENSBTAG00000047462	94.3299	64.7766	0.683841	0.141399	-2.27389
transcript:ENSBTAT00000008822	ARIH1	35.1945	40.113	0.71159	0.148147	-2.26402
transcript:ENSBTAT00000010688	CHD5	21.5088	39.7303	2.41713	0.503536	-2.26313
transcript:ENSBTAT00000010928	FKBP1A	26.9208	37.7633	0.753779	0.157454	-2.25921
transcript:ENSBTAT00000003694	IRF6	35.9288	62.6739	0.563421	0.118431	-2.25017
transcript:ENSBTAT00000025066	CMTM2	36.7143	35.1973	1.08637	0.228787	-2.24745
transcript:ENSBTAT00000000195	GSTT4	37.3267	47.6386	0.754819	0.15925	-2.24484
transcript:ENSBTAT00000039655	LIMCH1	40.139	36.5572	0.508039	0.107268	-2.24372
transcript:ENSBTAT00000018966	gene:ENSBTAG00000014274	43.8119	51.1757	0.841109	0.177782	-2.24218
transcript:ENSBTAT00000000486	SSRP1	36.6527	30.7531	9.61491	2.0447	-2.23339
transcript:ENSBTAT00000007412	gene:ENSBTAG00000005639	96.7192	68.5039	0.688703	0.146938	-2.22867
transcript:ENSBTAT00000019943	OTUB2	28.1394	30.5651	0.697653	0.14972	-2.22025
transcript:ENSBTAT00000002055	CALM2	24.2313	35.525	0.870304	0.187076	-2.2179
transcript:ENSBTAT00000054070	gene:ENSBTAG00000037410	42.936	40.8783	1.75973	0.37839	-2.21741
transcript:ENSBTAT00000047197	TPM3	46.269	54.8112	0.786383	0.169986	-2.20982
transcript:ENSBTAT00000065517	CFAP97D1	29.9892	18.5784	0.673198	0.146079	-2.20429
transcript:ENSBTAT00000015924	PPIA	28.3482	18.9167	1.22105	0.267284	-2.19168
transcript:ENSBTAT00000013496	POLR2D	61.3969	66.0621	2.79127	0.614795	-2.18274
transcript:ENSBTAT00000028671	DNPEP	32.5707	38.7155	0.918293	0.202864	-2.17844
transcript:ENSBTAT00000005793	HMGB3	13.9367	61.2754	0.519591	0.115173	-2.17357
transcript:ENSBTAT00000008372	TUBB4B	68.6066	50.6557	1.05949	0.23706	-2.16004
transcript:ENSBTAT00000046199	SPINK2B	16.6735	13.4827	0.664077	0.148611	-2.15981
transcript:ENSBTAT00000012810	ATP5MD	25.4119	22.4011	0.918098	0.205697	-2.15813
transcript:ENSBTAT00000064961	C19H17orf107	61.4679	19.9214	0.685334	0.153838	-2.1554
transcript:ENSBTAT00000014687	gene:ENSBTAG00000027770	48.0579	41.6138	0.803878	0.183213	-2.13346
transcript:ENSBTAT00000005211	GSTO2	29.1731	42.6636	0.724402	0.166169	-2.12414
transcript:ENSBTAT00000029328	PCNT	20.1329	34.2259	0.858441	0.198171	-2.11497
transcript:ENSBTAT00000026118	LDHB	55.9247	69.0362	0.652059	0.150576	-2.11451
transcript:ENSBTAT00000005279	JUN	60.8504	50.0489	0.652747	0.151103	-2.111
transcript:ENSBTAT00000021172	SDHAF3	55.9815	55.1036	0.797638	0.185518	-2.10417
transcript:ENSBTAT00000055138	ZNRF4	100	84.9634	1.06168	0.247027	-2.10361
transcript:ENSBTAT00000011448	SLC46A3	34.6162	30.6067	0.573943	0.134908	-2.08893
transcript:ENSBTAT00000012670	gene:ENSBTAG00000009621	96.6134	75.4468	1.5945	0.375612	-2.08579
transcript:ENSBTAT00000045683	HEMGN	52.1668	50.2504	1.57373	0.37551	-2.06727
transcript:ENSBTAT00000065572	gene:ENSBTAG00000045568	100	87.5406	0.78723	0.18795	-2.06644
transcript:ENSBTAT00000043235	UBE2B	41.8291	47.1628	1.42412	0.343372	-2.05223
transcript:ENSBTAT00000012570	ATP2B1	45.4118	38.6794	0.928108	0.225585	-2.04062
transcript:ENSBTAT00000027091	BTG1	55.5146	57.4327	0.973956	0.237069	-2.03855
transcript:ENSBTAT00000036316	OPCML	49.0195	65.0461	1.35258	0.330309	-2.03382
transcript:ENSBTAT00000056966	MCRIP1	49.0993	23.8793	0.940684	0.230187	-2.0309
transcript:ENSBTAT00000012001	ACSBG2	43.8399	46.7992	1.17428	0.287592	-2.02969
transcript:ENSBTAT00000013015	FAM71F1	48.4905	54.0863	1.53419	0.376447	-2.02696
transcript:ENSBTAT00000002349	RPL36	31.869	25	1.98652	0.487763	-2.02599
transcript:ENSBTAT00000037101	GET4	17.3276	27.2727	0.683345	0.168047	-2.02375
transcript:ENSBTAT00000047412	PKM	29.189	29.6727	0.520024	0.128572	-2.016
transcript:ENSBTAT00000010348	GLS	45.5921	42.8751	0.56627	0.140327	-2.0127
transcript:ENSBTAT00000021880	FXR1	41.0342	47.476	1.03972	0.258306	-2.00904
transcript:ENSBTAT00000003722	ARL4A	57.245	38.0767	0.550918	0.136939	-2.0083
transcript:ENSBTAT00000039835	CAMK2D	38.6717	27.8784	2.132	0.531513	-2.00403
transcript:ENSBTAT00000028279	DCAF5	42.2407	42.5263	3.49892	0.876255	-1.99749
transcript:ENSBTAT00000038488	GLUL	36.0337	60.7826	1.67624	0.419809	-1.99743
transcript:ENSBTAT00000016431	CHMP5	40.8333	47.9957	43.5259	10.9093	-1.99631
transcript:ENSBTAT00000035312	C12H13orf46	27.6246	12.1212	3.10989	0.784504	-1.98701
transcript:ENSBTAT00000043424	LPIN1	31.0444	53.0009	1.58891	0.401388	-1.98497
transcript:ENSBTAT00000044551	LYRM4	15.6792	34.8905	0.69753	0.176343	-1.98387
transcript:ENSBTAT00000006705	LRP2BP	36.356	23.9559	4.08989	1.03461	-1.98298
transcript:ENSBTAT00000016514	PPP1CB	39.9261	39.6578	0.76607	0.19389	-1.98224
transcript:ENSBTAT00000054670	gene:ENSBTAG00000039870	100	100	5.41798	1.37424	-1.97912
transcript:ENSBTAT00000048797	gene:ENSBTAG00000034449	98.1544	82.8859	1.08689	0.276507	-1.97481
transcript:ENSBTAT00000001883	ARL6IP6	31.1061	21.2485	0.625885	0.159489	-1.97244
transcript:ENSBTAT00000006115	COQ10B	45.211	46.4414	0.553636	0.142155	-1.96147
transcript:ENSBTAT00000013000	SUMO1	35.231	53.4028	0.877563	0.226714	-1.95263
transcript:ENSBTAT00000039155	UBE2V1	19.2332	26.4175	0.641179	0.166069	-1.94894
transcript:ENSBTAT00000020570	SRD5A1	26.7203	21.7295	0.845902	0.219367	-1.94714
transcript:ENSBTAT00000018295	IRGC	65.36	84.9603	1.7924	0.465191	-1.946
transcript:ENSBTAT00000010469	ARPC4	29.1416	43.1821	0.770302	0.200643	-1.9408
transcript:ENSBTAT00000004020	DCUN1D5	50.908	52.3824	1.13525	0.296341	-1.93768
transcript:ENSBTAT00000045348	LKAAEAR1	44.2244	27.2827	0.616157	0.161453	-1.93218
transcript:ENSBTAT00000052050	gene:ENSBTAG00000039555	69.4015	56.3707	0.885189	0.232441	-1.92912
transcript:ENSBTAT00000049153	AKAP1	32.7052	21.4507	1.08578	0.285221	-1.92858
transcript:ENSBTAT00000021838	CTNNB1	45.9607	56.3572	0.841406	0.221741	-1.92392
transcript:ENSBTAT00000032051	HNRNPL	31.3413	52.4352	0.639284	0.168638	-1.92253
transcript:ENSBTAT00000005001	RIMS2	31.9282	32.4315	0.77496	0.206585	-1.90739
transcript:ENSBTAT00000013448	PAK1	49.1221	43.906	0.675275	0.180251	-1.90547
transcript:ENSBTAT00000025323	SLC30A7	52.6807	44.4592	1.24111	0.332394	-1.90067
transcript:ENSBTAT00000006129	RDX	45.6112	26.937	0.64751	0.174981	-1.88771
transcript:ENSBTAT00000004597	DPM3	59.0278	32.8125	0.966419	0.263706	-1.87372
transcript:ENSBTAT00000043503	PKIG	37.9802	67.2712	0.927976	0.25446	-1.86665
transcript:ENSBTAT00000009607	RAD21	49.2511	62.1277	2.5979	0.720462	-1.85035
transcript:ENSBTAT00000013140	MORC2	23.3199	31.228	0.574519	0.159652	-1.84743
transcript:ENSBTAT00000024387	TMSB4X	28.7512	41.6747	0.955479	0.267702	-1.8356
transcript:ENSBTAT00000007053	TGFB2	50.6845	47.4764	0.823719	0.232207	-1.82674
transcript:ENSBTAT00000046011	UBC	90.929	87.1038	0.786454	0.222918	-1.81885
transcript:ENSBTAT00000024094	HMGB1	54.9159	64.2408	1.88502	0.536777	-1.81219
transcript:ENSBTAT00000052059	HNRNPU	58.738	60.4761	1.09967	0.313173	-1.81204
transcript:ENSBTAT00000011114	MEIS1	48.8198	44.1795	1.53903	0.438354	-1.81185
transcript:ENSBTAT00000034186	H3F3A	42.9425	48.9691	2.98215	0.849773	-1.8112
transcript:ENSBTAT00000049295	gene:ENSBTAG00000034824	100	94.7154	4.95148	1.41299	-1.80911
transcript:ENSBTAT00000012042	NKG7	26.4439	58.8812	0.625544	0.178796	-1.80679
transcript:ENSBTAT00000010269	MTPN	45.2197	48.2724	3.20525	0.916508	-1.80622
transcript:ENSBTAT00000010015	TMED6	37.5191	27.4618	1.13857	0.325577	-1.80616
transcript:ENSBTAT00000016164	DKKL1	32.121	22.0765	1.80259	0.5174	-1.80071
transcript:ENSBTAT00000035849	SORD	33.4327	46.2741	0.520693	0.149922	-1.79622
transcript:ENSBTAT00000001706	TMEM50A	26.1555	39.3314	0.57058	0.164561	-1.7938
transcript:ENSBTAT00000046417	RETREG1	34.0971	26.3756	0.856748	0.248344	-1.78653
transcript:ENSBTAT00000065974	RF00017	60	57.7419	2.58626	0.751931	-1.78219
transcript:ENSBTAT00000012287	NDUFA5	52.1725	49.5478	0.565297	0.164754	-1.7787
transcript:ENSBTAT00000002827	KHDRBS3	35.807	35.5321	0.599455	0.175239	-1.77432
transcript:ENSBTAT00000034838	CWC25	38.2686	61.9193	3.16234	0.925519	-1.77266
transcript:ENSBTAT00000004897	AKIRIN2	33.469	40.6795	1.2437	0.366534	-1.76262
transcript:ENSBTAT00000020427	MLLT11	60.4298	75.7689	2.67723	0.793936	-1.75365
transcript:ENSBTAT00000019612	CHD4	44.9391	45.7355	2.6308	0.785846	-1.74318
transcript:ENSBTAT00000046152	ATL3	34.2175	47.374	0.798518	0.238612	-1.74266
transcript:ENSBTAT00000044974	gene:ENSBTAG00000031719	98.3974	100	0.927622	0.277413	-1.7415
transcript:ENSBTAT00000008026	SLF1	46.716	45.4336	0.72154	0.21628	-1.73818
transcript:ENSBTAT00000012950	gene:ENSBTAG00000009823	73.3696	72.3913	0.593612	0.178212	-1.73593
transcript:ENSBTAT00000027798	PELI1	39.3593	31.2838	0.714599	0.215032	-1.73258
transcript:ENSBTAT00000006190	DYNLL2	48.1088	54.1966	1.32817	0.403707	-1.71806
transcript:ENSBTAT00000063744	gene:ENSBTAG00000046450	97.4281	94.0998	3.63537	1.11002	-1.71152
transcript:ENSBTAT00000017329	SIX6	34.46	85.9363	1.89971	0.583893	-1.702
transcript:ENSBTAT00000018634	TRIM36	33.5727	48.6608	0.904763	0.27855	-1.69961
transcript:ENSBTAT00000021774	SLC35G6	65.9018	68.1963	0.862977	0.269516	-1.67895
transcript:ENSBTAT00000024634	gene:ENSBTAG00000018506	96.4664	100	0.753624	0.235504	-1.67809
transcript:ENSBTAT00000015381	CD44	43.0025	38.038	1.22469	0.385525	-1.66752
transcript:ENSBTAT00000008738	TSSK6	100	98.9051	2.43641	0.771154	-1.65967
transcript:ENSBTAT00000024009	CNOT7	43.6129	53.8283	0.655901	0.207626	-1.65949
transcript:ENSBTAT00000024448	DPYSL2	46.9156	52.9795	1.60312	0.509363	-1.65412
transcript:ENSBTAT00000033734	gene:ENSBTAG00000024361	96.0403	86.6811	1.34645	0.428595	-1.65147
transcript:ENSBTAT00000003560	OSTF1	47.7378	45.6754	0.790505	0.252048	-1.64908
transcript:ENSBTAT00000013021	NRN1	28.9576	37.8635	2.09579	0.669411	-1.64653
transcript:ENSBTAT00000037998	TAF12	41.7938	71.1623	0.99075	0.316756	-1.64515
transcript:ENSBTAT00000017839	ENO1	36.5114	34.6492	0.567978	0.181688	-1.64437
transcript:ENSBTAT00000019411	CALM3	26.4663	42.6581	1.28029	0.41055	-1.64084
transcript:ENSBTAT00000033850	FDX1	41.5018	33.4248	0.694927	0.223116	-1.63907
transcript:ENSBTAT00000060547	MT-ND3	76.0116	83.526	2.36198	0.760161	-1.63562
transcript:ENSBTAT00000063866	gene:ENSBTAG00000045504	100	78.0735	0.722324	0.232512	-1.63534
transcript:ENSBTAT00000032432	LTN1	47.2849	41.9766	0.708714	0.228376	-1.63379
transcript:ENSBTAT00000035337	gene:ENSBTAG00000032954	100	89.5408	0.97797	0.316137	-1.62924
transcript:ENSBTAT00000036888	ACTB	57.8253	82.3271	1.06597	0.345942	-1.62356
transcript:ENSBTAT00000017968	ATP6V1C1	42.8974	33.8276	1.32638	0.431086	-1.62145
transcript:ENSBTAT00000007405	LSM2	44.6529	68.4221	2.51238	0.81681	-1.62098
transcript:ENSBTAT00000037234	PDHA2	96.006	40.3165	1.35683	0.444449	-1.61015
transcript:ENSBTAT00000003832	ATP5MC3	27.6117	21.9544	1.53516	0.502975	-1.60983
transcript:ENSBTAT00000043336	FAM71D	41.4807	16.4046	1.57233	0.516468	-1.60615
transcript:ENSBTAT00000048145	TCEAL8	71.2159	30.0868	0.630308	0.207071	-1.60593
transcript:ENSBTAT00000061309	UCK2	39.8726	36.4937	1.4245	0.468244	-1.60513
transcript:ENSBTAT00000028781	gene:ENSBTAG00000022498	100	100	1.61587	0.533712	-1.59818
transcript:ENSBTAT00000017533	WBP2NL	32.9145	27.0471	0.606294	0.200404	-1.59711
transcript:ENSBTAT00000060989	PRELID2	44.092	47.1307	0.631783	0.210689	-1.58431
transcript:ENSBTAT00000019336	PGAM2	67.1338	88.0679	1.50867	0.503326	-1.58371
transcript:ENSBTAT00000048732	BRD9	23.2355	9.891	2.40796	0.809261	-1.57314
transcript:ENSBTAT00000046195	TMEM258	48.9133	64.2608	0.700227	0.235335	-1.57311
transcript:ENSBTAT00000037014	LBH	40.5953	38.3345	0.547568	0.185859	-1.55883
transcript:ENSBTAT00000065590	COX7B	14.5739	16.2632	0.750219	0.256119	-1.5505
transcript:ENSBTAT00000063995	gene:ENSBTAG00000046374	98.2759	100	0.983724	0.337311	-1.54417
transcript:ENSBTAT00000035504	LURAP1L	39.7171	30.2365	2.06788	0.709995	-1.54228
transcript:ENSBTAT00000002457	C22H3orf14	57.1685	73.3098	2.53262	0.869958	-1.54161
transcript:ENSBTAT00000002191	RTF1	50.1214	65.6093	2.46326	0.84648	-1.54102
transcript:ENSBTAT00000017001	ZNF428	29.0939	31.6464	0.902441	0.310634	-1.53862
transcript:ENSBTAT00000002429	NR4A3	38.9826	39.4257	0.796316	0.2748	-1.53496
transcript:ENSBTAT00000027369	PYURF	53.1618	56.806	0.578833	0.200959	-1.52625
transcript:ENSBTAT00000008460	GAP43	29.5129	19.9081	1.65833	0.580754	-1.51373
transcript:ENSBTAT00000061234	BAZ2B	36.2645	31.3331	0.728671	0.256428	-1.50671
transcript:ENSBTAT00000008225	HSP90AA1	66.6542	63.7097	0.692468	0.244127	-1.50412
transcript:ENSBTAT00000017811	CDKAL1	48.5024	43.5775	0.5144	0.181693	-1.50138
transcript:ENSBTAT00000006950	NT5C1B	35.8482	75.6147	0.65841	0.234941	-1.48669
transcript:ENSBTAT00000054497	MAP7	42.5591	40.3769	0.770845	0.275683	-1.48343
transcript:ENSBTAT00000046131	APH1A	55.4032	59.1059	1.08375	0.390652	-1.47207
transcript:ENSBTAT00000043753	LGALS3	38.356	47.037	0.518731	0.187341	-1.46932
transcript:ENSBTAT00000062561	RF00100	100	75.5224	4.54634	1.64367	-1.46778
transcript:ENSBTAT00000044628	ANKRD9	42.9809	41.5367	9.63523	3.4918	-1.46435
transcript:ENSBTAT00000063811	gene:ENSBTAG00000047341	70.2365	56.3365	0.634977	0.231698	-1.45446
transcript:ENSBTAT00000045591	CDH3	41.7128	41.8987	0.567056	0.209335	-1.43768
transcript:ENSBTAT00000064153	THUMPD1	38.4778	56.5422	0.582081	0.215122	-1.43607
transcript:ENSBTAT00000035766	HSPA1L	57.7164	52.5721	0.57395	0.212694	-1.43214
transcript:ENSBTAT00000027988	GTF2F1	43.8547	67.1299	0.626318	0.233742	-1.42198
transcript:ENSBTAT00000008831	FBXO8	34.9353	25.7467	0.778697	0.290742	-1.42132
transcript:ENSBTAT00000064566	gene:ENSBTAG00000047642	100	64.5161	0.956537	0.357544	-1.4197
transcript:ENSBTAT00000032851	YWHAQ	38.8119	27.6159	0.751255	0.280848	-1.41951
transcript:ENSBTAT00000022353	SGMS2	23.3182	24.7024	0.599858	0.224904	-1.41531
transcript:ENSBTAT00000014774	gene:ENSBTAG00000002284	98.3003	93.39	2.31181	0.867216	-1.41456
transcript:ENSBTAT00000044163	ADIG	27.9012	39.5784	0.798009	0.301787	-1.40287
transcript:ENSBTAT00000027490	UTP18	43.1356	50.4368	0.540759	0.204634	-1.40194
transcript:ENSBTAT00000012216	ELMSAN1	23.9269	62.8927	0.522201	0.198178	-1.39781
transcript:ENSBTAT00000024811	DLX5	41.6296	62.3039	1.04754	0.397739	-1.39711
transcript:ENSBTAT00000013247	gene:ENSBTAG00000027787	100	91.3043	1.33535	0.512255	-1.38229
transcript:ENSBTAT00000032525	YPEL5	21.1301	18.7135	2.41018	0.925067	-1.38151
transcript:ENSBTAT00000026503	HAS2	35.8984	38.0019	1.10031	0.427666	-1.36336
transcript:ENSBTAT00000031298	MBL1	70.0561	29.7976	0.53171	0.207792	-1.3555
transcript:ENSBTAT00000027122	PAQR5	50.0705	50.1662	0.575304	0.225046	-1.35411
transcript:ENSBTAT00000006715	COX7A2	24.197	14.308	1.40957	0.551977	-1.35257
transcript:ENSBTAT00000036177	NOP10	56.5527	61.7094	0.658586	0.258955	-1.34667
transcript:ENSBTAT00000023996	LANCL2	36.9216	50.7763	0.60685	0.239041	-1.34408
transcript:ENSBTAT00000048870	GTF2F2	44.6081	38.3305	0.572638	0.227562	-1.33136
transcript:ENSBTAT00000016907	ANKRD2	25.4693	33.8541	0.657205	0.263592	-1.31804
transcript:ENSBTAT00000002300	AHCYL2	45.1239	45.0947	1.21789	0.48855	-1.31781
transcript:ENSBTAT00000045777	gene:ENSBTAG00000032281	90.9418	94.1769	1.45247	0.583079	-1.31674
transcript:ENSBTAT00000003190	SEC61B	64.6195	67.1243	0.91722	0.369117	-1.31319
transcript:ENSBTAT00000008070	gene:ENSBTAG00000006133	72.0542	60.0626	0.980288	0.394889	-1.31176
transcript:ENSBTAT00000027710	KCNA4	54.3528	65.2046	0.585052	0.236231	-1.30837
transcript:ENSBTAT00000039811	COL13A1	33.2543	28.1327	0.525672	0.212732	-1.30513
transcript:ENSBTAT00000000831	LSM14A	48.4362	61.223	0.552627	0.223679	-1.30488
transcript:ENSBTAT00000002707	CDC34	21.2671	13.5959	1.33737	0.542696	-1.30119
transcript:ENSBTAT00000052393	UBE2N	33.1504	44.8376	1.45544	0.597667	-1.28405
transcript:ENSBTAT00000023396	GPAT3	44.1797	48.1212	1.74567	0.729032	-1.25973
transcript:ENSBTAT00000002948	EIF1	60.3987	51.251	2.98466	1.25064	-1.2549
transcript:ENSBTAT00000014644	TMEM52B	58.9723	58.7013	0.584059	0.244959	-1.25358
transcript:ENSBTAT00000039245	ROMO1	54.6345	96.0183	0.711384	0.299253	-1.24926
transcript:ENSBTAT00000003498	KIT	37.7917	42.4443	0.522034	0.219813	-1.24786
transcript:ENSBTAT00000012530	EIF4E	34.0955	27.1347	1.62983	0.687027	-1.24628
transcript:ENSBTAT00000014983	FAM133A	100	82.2086	0.717285	0.304121	-1.2379
transcript:ENSBTAT00000000389	LMO4	51.6623	60.1626	1.91139	0.810621	-1.23752
transcript:ENSBTAT00000004007	EFNA1	24.5152	21.2121	0.506271	0.216263	-1.22712
transcript:ENSBTAT00000006318	KRTAP27-1	90.8719	77.4137	1.15278	0.497505	-1.21234
transcript:ENSBTAT00000011643	JPH1	35.1681	35.3975	0.786836	0.341977	-1.20216
transcript:ENSBTAT00000043182	BHLHE41	28.0811	34.2278	1.62241	0.706402	-1.19957
transcript:ENSBTAT00000056240	gene:ENSBTAG00000038849	39.2187	28.8821	11.7439	5.12829	-1.19536
transcript:ENSBTAT00000032643	gene:ENSBTAG00000023792	100	93.379	0.52625	0.23058	-1.19048
transcript:ENSBTAT00000018778	MGC148714	40.8628	64.4189	2.11795	0.928389	-1.18987
transcript:ENSBTAT00000021199	DNAJA4	28.8839	25.0262	0.522034	0.229586	-1.18511
transcript:ENSBTAT00000047156	PABPN1	62.819	70.4508	4.34445	1.91095	-1.18488
transcript:ENSBTAT00000027308	HIST1H2BD	98.0671	95.9308	0.664799	0.292767	-1.18317
transcript:ENSBTAT00000028031	ELAVL4	46.5714	50.2418	0.59863	0.264849	-1.17649
transcript:ENSBTAT00000016997	SRSF9	37.4522	63.8535	0.818866	0.364173	-1.169
transcript:ENSBTAT00000003961	SPIN1	55.5174	59.1839	0.847155	0.380087	-1.1563
transcript:ENSBTAT00000013663	EZR	28.7539	58.5271	0.564605	0.253762	-1.15377
transcript:ENSBTAT00000054758	PTP4A2	30.3465	31.4538	0.553737	0.249221	-1.15178
transcript:ENSBTAT00000038591	NCALD	30.0593	16.5352	1.99782	0.907183	-1.13896
transcript:ENSBTAT00000022636	PPARGC1A	50.8415	44.6613	1.53342	0.700489	-1.13031
transcript:ENSBTAT00000062960	RF00017	98.6532	91.2458	3.70046	1.69145	-1.12944
transcript:ENSBTAT00000024782	ABHD14B	52.5796	60.2634	0.526333	0.241059	-1.12659
transcript:ENSBTAT00000059593	RF00100	100	100	6.06775	2.78603	-1.12295
transcript:ENSBTAT00000053463	CAB39	39.5977	30.1982	0.593342	0.27358	-1.1169
transcript:ENSBTAT00000065463	gene:ENSBTAG00000014448	35.9276	22.4434	0.694003	0.320595	-1.11419
transcript:ENSBTAT00000035406	PHACTR1	28.3409	32.4811	0.663654	0.307524	-1.10973
transcript:ENSBTAT00000000943	COX7A2L	44.3896	45.5716	1.66305	0.770881	-1.10925
transcript:ENSBTAT00000049560	ATXN7L3B	74.1841	77.6886	1.44412	0.671265	-1.10523
transcript:ENSBTAT00000027808	MAT2A	43.2047	28.8332	0.799316	0.373846	-1.09632
transcript:ENSBTAT00000064997	gene:ENSBTAG00000031359	91.8154	92.8606	1.56306	0.731617	-1.09521
transcript:ENSBTAT00000049126	ZNRF1	27.8732	40.1713	0.712914	0.334355	-1.09235
transcript:ENSBTAT00000020987	CREB3L2	39.4838	42.7902	0.845183	0.39906	-1.08266
transcript:ENSBTAT00000004381	ACAP2	39.1482	31.9444	0.928145	0.439008	-1.0801
transcript:ENSBTAT00000053602	gene:ENSBTAG00000040580	46.5352	30.217	0.650812	0.308087	-1.07891
transcript:ENSBTAT00000005580	gene:ENSBTAG00000000425	100	100	1.5033	0.713593	-1.07496
transcript:ENSBTAT00000012551	SUCLG2	38.2786	32.2159	1.06414	0.506759	-1.07032
transcript:ENSBTAT00000025431	TSC22D1	58.66	64.804	0.578198	0.275608	-1.06895
transcript:ENSBTAT00000002064	GPATCH2	51.8021	51.2692	0.524034	0.25287	-1.05126
transcript:ENSBTAT00000053510	CCDC77	39.3668	70.1269	0.509567	0.246481	-1.0478
transcript:ENSBTAT00000023084	BAG5	56.436	71.2803	0.623989	0.302708	-1.04359
transcript:ENSBTAT00000026719	TNFRSF21	49.2962	60.395	0.515394	0.250948	-1.03829
transcript:ENSBTAT00000003783	INHBA	52.8911	73.5414	1.28667	0.627889	-1.03506
transcript:ENSBTAT00000063427	gene:ENSBTAG00000046867	100	93.9746	0.865012	0.422971	-1.03216
transcript:ENSBTAT00000005451	CLYBL	34.3388	34.6282	0.559381	0.27388	-1.03029
transcript:ENSBTAT00000045616	NELL2	42.8395	36.6984	0.614624	0.301393	-1.02806
transcript:ENSBTAT00000023908	PTGES3	34.5844	51.3032	0.670361	0.32886	-1.02746
transcript:ENSBTAT00000013570	DUSP14	45.8475	68.5643	0.5581	0.273806	-1.02737
transcript:ENSBTAT00000052158	FAM229A	70.2105	56.8421	1.79654	0.887446	-1.01749
transcript:ENSBTAT00000021993	FOXP1	49.5315	52.4111	0.927395	0.461131	-1.00801
transcript:ENSBTAT00000061439	SLMAP	49.3331	38.2396	0.510177	0.253743	-1.00763
transcript:ENSBTAT00000050762	LPXN	32.5972	34.986	0.640558	0.319055	-1.00552
transcript:ENSBTAT00000061343	NCOR1	23.2165	27.8022	1.00932	0.503097	-1.00448
transcript:ENSBTAT00000026845	DEDD	32.7917	37.2427	0.644505	0.321984	-1.0012
